# Supplementary material for: Dominant drivers of the human plasma metabolome
Source: Research Square preprint supplement (doi:10.21203/rs.3.rs-688716/v1), 2021-07-19
Supplement: Supplementary file 2 [file 44bda2fa283c4e3fa75f6a19.xlsx]

## Sheet: Index
Index for supplementary tables:
S1	Sample size of each omics dataset involved in present study
S2	Summary of 1183 annotated plasma metabolites
S3	78 dietary factors involved in the analysis
S4	Inter-individual variations of whole plasma metabolome explained by diet, genetics and microbiome
S5	Metabolite associations to diets
S6	Metabolite associations to human genetics
S7	Metabolite associations to microbial species
S8	Metabolite associations to microbial MetaCyc pathways
S9	Inter-individual variations in each metabolite explained by diet, genetics and microbiome
S10	Intra-correlation of metabolite levels between baseline and follow-up
S11	Results of Mendelian Randomization analysis testing the causal effect of microbiome on metabolites
S12	Mendelian Randomization analysis testing the causal effect of microbiome on metabolites
S13	Inverse Mendelian Randomization analysis testing the causal effect of microbiome on metabolites
S14	Metabolite associations to microbial gutSMASH pathways
S15	Metabolite associations to microbial vSVs
S16	Metabolite associations to microbial dSVs
S17	Mediation linkages among diet, microbiome and metabolites
S18	Association between phenotypes and plasma metabolome PCs

## Sheet: S1_sample_size
Between-individual analysis	Discovery	Replication1	Replication2	Replication3
	LLD baseline	LLD follow-up	LLD subset	GoNL
dietary habit associations to metabolites	1054	311	-	-
GWAS (metabolitesQTL)	933	311	237	77
microbial species abundance associations to metabolites	1054	311	-	-
microbial pathway abundance associations to metabolites	1054	311	-	-
microbial species vSV associations to metabolites	1054	311	-	-
microbial species dSV associations to metabolites	1054	311	-	-
Mendelian randomisation analysis (MR): microbial abundance as exposure while metabolites as outcome	933	311	-	-
Mediation analysis: diet influence metabolite through microbial strain (SV)	1054	311	-	-
Mediation analysis: diet influence microbial strain (SV) through metabolite	1054	311	-	-
Within-individual analysis	LLD baseline		LLD follow-up
microbial species abundance changes associate with metabolic changes	311		311
microbial pathway abundance changes associate with metabolic changes	311		311
microbial species vSV changes associate with metabolic changes	311		311
microbial species dSV changes associate with metabolic changes	311		311

## Sheet: S2_1183metabolites_summary
meta_id	ionIdx	ionMz	ionActive	ionQualTIC	ionAverageInt	mz delta	formula	ion	score	HMDB	name	super_class	class	sub_class	molecular_framework	direct_parent	previously_reported	name
meta_1	1	53.0395	TRUE	0.628358	1650.3	0.000168469	C4H6	-H(-)	100	HMDB0041792	1,3-Butadiene	Hydrocarbons	Unsaturated hydrocarbons	Olefins	Aliphatic acyclic compounds	Alkadienes	NA	1,3-Butadiene
meta_2	2	54.0352	TRUE	0.197911	2902.79	-0.000250873	C3H5N	-H(-)	100	HMDB0061870	N-Methylene-ethenamine	Organic 1,3-dipolar compounds	Propargyl-type 1,3-dipolar organic compounds	Not classified	Aliphatic acyclic compounds	Propargyl-type 1,3-dipolar organic compounds	NA	N-Methylene-ethenamine
meta_3	3	55.0191	TRUE	0.320584	4272.94	-0.00015492	C3H4O	-H(-)	100	HMDB0041822	Acrolein	Organic oxygen compounds	Organooxygen compounds	Carbonyl compounds	Aliphatic acyclic compounds	Enals	NA	Acrolein
meta_4	4	57.0343	TRUE	0.538498	9464.05	0.000249005	C3H6O	-H(-)	100	HMDB0001659	Acetone	Organic oxygen compounds	Organooxygen compounds	Carbonyl compounds	Aliphatic acyclic compounds	Ketones	NA	Acetone
meta_5	5	59.0141	TRUE	0.806066	31120.9	-0.000287918	C2H4O2	-H(-)	100	HMDB0000042	Acetic acid	Organic acids and derivatives	Carboxylic acids and derivatives	Carboxylic acids	Aliphatic acyclic compounds	Carboxylic acids	yes	Acetic acid
meta_6	6	59.9858	TRUE	0.303395	1965.3	-0.000509347	CHO3	-H(-)	100	HMDB0000595	Hydrogen carbonate	Organic acids and derivatives	Organic carbonic acids and derivatives	Organic carbonic acids	Aliphatic acyclic compounds	Organic carbonic acids	NA	Hydrogen carbonate
meta_7	7	61.0292	TRUE	0.513323	2592.14	0.000346783	C2H6O2	-H(-)	100	HMDB0031430	Dimethyl peroxide	Organooxygen compounds	Organic oxides	Organic peroxides	Aliphatic acyclic compounds	Dialkyl peroxides	NA	Dimethyl peroxide
meta_8	8	65.0396	TRUE	0.502033	1749.42	4.45e-05	C5H6	-H(-)	100	HMDB0061878	Cyclopentadiene	Hydrocarbons	Unsaturated hydrocarbons	Olefins	Aliphatic homomonocyclic compounds	Cycloalkenes	NA	Cyclopentadiene
meta_9	9	67.0191	TRUE	0.455433	4256.79	-0.000124793	C4H4O	-H(-)	100	HMDB0006853	3-Butyn-1-al	Organic oxygen compounds	Organooxygen compounds	Carbonyl compounds	Aliphatic acyclic compounds	Alpha-hydrogen aldehydes	NA	3-Butyn-1-al
meta_10	10	69.0343	TRUE	0.251231	3199.78	0.000270428	C4H6O	-H(-)	100	HMDB0034233	(E)-2-Butenal	Organic oxygen compounds	Organooxygen compounds	Carbonyl compounds	Aliphatic acyclic compounds	Enals	NA	(E)-2-Butenal
meta_11	11	71.0139	TRUE	0.821812	39237.7	-8.47e-05	C3H4O2	-H(-)	100	HMDB0001167	Pyruvaldehyde	Organic oxygen compounds	Organooxygen compounds	Carbonyl compounds	Aliphatic acyclic compounds	Alpha ketoaldehydes	NA	Pyruvaldehyde
meta_12	12	71.0507	TRUE	0.412856	3332.16	-0.000511218	C4H8O	-H(-)	100	HMDB0000246	Tetrahydrofuran	Organoheterocyclic compounds	Tetrahydrofurans	Not classified	Aliphatic heteromonocyclic compounds	Tetrahydrofurans	NA	Tetrahydrofuran
meta_13	13	72.0462	TRUE	0.458978	2447.46	-0.000758549	C3H7NO	-H(-)	100	HMDB0001106	3-Aminopropionaldehyde	Organic oxygen compounds	Organooxygen compounds	Carbonyl compounds	Aliphatic acyclic compounds	Alpha-hydrogen aldehydes	NA	3-Aminopropionaldehyde
meta_14	14	73.0103	TRUE	0.586128	16502.6	0.00148285	C3H6S	-H(-)	46	HMDB0031635	2-Propene-1-thiol	Organosulfur compounds	Allyl sulfur compounds	Not classified	Aliphatic acyclic compounds	Allyl sulfur compounds	NA	2-Propene-1-thiol
meta_15	15	73.0296	TRUE	0.379854	12062.5	-9.86e-05	C3H6O2	-H(-)	100	HMDB0000237	Propionic acid	Organic acids and derivatives	Carboxylic acids and derivatives	Carboxylic acids	Aliphatic acyclic compounds	Carboxylic acids	NA	Propionic acid
meta_16	16	74.0249	TRUE	0.777432	32448.7	-0.000132021	C2H5NO2	-H(-)	100	HMDB0000123	Glycine	Organic acids and derivatives	Carboxylic acids and derivatives	Amino acids, peptides, and analogues	Aliphatic acyclic compounds	Alpha amino acids	yes	Glycine
meta_17	17	74.991	TRUE	0.519209	46973.5	-1.67e-05	C2H4OS	-H(-)	100	HMDB0031188	Ethanethioic acid	Organic acids and derivatives	Thiocarboxylic acids and derivatives	Thiocarboxylic acids	Aliphatic acyclic compounds	Thiocarboxylic acids	NA	Ethanethioic acid
meta_18	18	75.0091	TRUE	0.704233	24072.9	-0.000296113	C2H4O3	-H(-)	100	HMDB0000115	Glycolic acid	Organic acids and derivatives	Hydroxy acids and derivatives	Alpha hydroxy acids and derivatives	Aliphatic acyclic compounds	Alpha hydroxy acids and derivatives	NA	Glycolic acid
meta_19	19	77.0398	TRUE	0.351669	4443.75	-0.000171494	C6H6	-H(-)	100	HMDB0001505	Benzene	Benzenoids	Benzene and substituted derivatives	Not classified	Aromatic homomonocyclic compounds	Benzene and substituted derivatives	NA	Benzene
meta_20	20	79.958	TRUE	0.263115	687415	-0.000588094	HO3S	-H(-)	100	HMDB0001033	Hydrogen sulfite	Homogeneous non-metal compounds	Non-metal oxoanionic compounds	Non-metal sulfites	Not classified	Non-metal sulfites	NA	Hydrogen sulfite
meta_21	21	80.9654	TRUE	0.569724	58246.2	-0.000179325	H2O3S	-H(-)	100	HMDB0034829	Sulfurous acid	Homogeneous non-metal compounds	Non-metal oxoanionic compounds	Non-metal sulfites	Not classified	Non-metal sulfites	NA	Sulfurous acid
meta_22	22	81.035	TRUE	0.241523	5275.63	-0.000362555	C5H6O	-H(-)	100	HMDB0013749	2-Methylfuran	Organoheterocyclic compounds	Heteroaromatic compounds	Not classified	Aromatic heteromonocyclic compounds	Heteroaromatic compounds	NA	2-Methylfuran
meta_23	23	81.0463	TRUE	0.308198	7335.85	-0.000466931	C4H6N2	-H(-)	100	HMDB0015344	Fomepizole	Organoheterocyclic compounds	Azoles	Pyrazoles	Aromatic heteromonocyclic compounds	Pyrazoles	NA	Fomepizole
meta_24	24	81.071	TRUE	-0.493134	3264.05	-3.22e-05	C6H10	-H(-)	100	HMDB0031544	3-Methylcyclopentene	Hydrocarbons	Unsaturated hydrocarbons	Olefins	Aliphatic homomonocyclic compounds	Cycloalkenes	NA	3-Methylcyclopentene
meta_25	25	82.9959	TRUE	0.467417	2214.15	0.000235479	C4H4S	-H(-)	100	HMDB0029718	Thiophene	Organoheterocyclic compounds	Heteroaromatic compounds	Not classified	Aromatic heteromonocyclic compounds	Heteroaromatic compounds	NA	Thiophene
meta_26	26	83.0141	TRUE	0.32711	8332.35	-0.000202041	C4H4O2	-H(-)	100	HMDB0032330	4-Hydroxy-2-butenoic acid gamma-lactone	Organoheterocyclic compounds	Dihydrofurans	Furanones	Aliphatic heteromonocyclic compounds	Butenolides	NA	4-Hydroxy-2-butenoic acid gamma-lactone
meta_27	27	83.0255	TRUE	0.864689	2245.33	-0.000411123	C3H4N2O	-H(-)	100	HMDB0004363	Imidazolone	Organic acids and derivatives	Carboxylic acids and derivatives	Amino acids, peptides, and analogues	Aliphatic heteromonocyclic compounds	Alpha amino acids and derivatives	NA	Imidazolone
meta_28	28	83.0507	TRUE	0.318404	6775.07	-0.000437818	C5H8O	-H(-)	100	HMDB0001184	Methyl propenyl ketone	Organic oxygen compounds	Organooxygen compounds	Carbonyl compounds	Aliphatic acyclic compounds	Enones	NA	Methyl propenyl ketone
meta_29	29	84.0459	TRUE	0.475916	5645.84	-0.000456162	C4H7NO	-H(-)	100	HMDB0002039	2-Pyrrolidinone	Organoheterocyclic compounds	Pyrrolidines	Pyrrolidones	Aliphatic heteromonocyclic compounds	Pyrrolidine-2-ones	yes	2-Pyrrolidinone
meta_30	30	85.0296	TRUE	0.765112	73652.5	-8.08e-05	C4H6O2	-H(-)	100	HMDB0000549	Gamma-Butyrolactone	Organoheterocyclic compounds	Lactones	Gamma butyrolactones	Aliphatic heteromonocyclic compounds	Gamma butyrolactones	NA	Gamma-Butyrolactone
meta_31	31	85.0654	TRUE	0.487208	3702.21	0.000492776	C5H10O	-H(-)	100	HMDB0006478	Iso-Valeraldehyde	Organic oxygen compounds	Organooxygen compounds	Carbonyl compounds	Aliphatic acyclic compounds	Alpha-hydrogen aldehydes	NA	Iso-Valeraldehyde
meta_32	32	86.025	TRUE	0.186477	20397.5	-0.000205401	C3H5NO2	-H(-)	100	HMDB0003609	2-Aminoacrylic acid	Organic acids and derivatives	Carboxylic acids and derivatives	Amino acids, peptides, and analogues	Aliphatic acyclic compounds	Alpha amino acids	NA	2-Aminoacrylic acid
meta_33	33	87.0084	TRUE	0.633752	78868.9	0.000321426	C3H4O3	-H(-)	100	HMDB0000243	Pyruvic acid	Organic acids and derivatives	Keto acids and derivatives	Alpha-keto acids and derivatives	Aliphatic acyclic compounds	Alpha-keto acids and derivatives	yes	Pyruvic acid
meta_34	34	88.0409	TRUE	0.807554	117281	-0.000478761	C3H7NO2	-H(-)	100	HMDB0000056	beta-Alanine	Organic acids and derivatives	Carboxylic acids and derivatives	Amino acids, peptides, and analogues	Aliphatic acyclic compounds	Beta amino acids and derivatives	yes	beta-Alanine
meta_35	35	89.0247	TRUE	0.792262	414216	-0.000309881	C3H6O3	-H(-)	100	HMDB0000190	L-Lactic acid	Organic acids and derivatives	Hydroxy acids and derivatives	Alpha hydroxy acids and derivatives	Aliphatic acyclic compounds	Alpha hydroxy acids and derivatives	yes	L-Lactic acid
meta_36	36	91.0225	TRUE	0.419865	48097.9	-0.000201812	C3H8OS	-H(-)	100	HMDB0030299	Cibulins	Organic acids and derivatives	Organosulfenic acids and derivatives	Organosulfenic acids	Aliphatic acyclic compounds	S-alkylsulfenates	NA	Cibulins
meta_37	37	92.051	TRUE	0.464988	5512.59	-0.000402784	C6H7N	-H(-)	100	HMDB0003012	Aniline	Benzenoids	Benzene and substituted derivatives	Aniline and substituted anilines	Aromatic homomonocyclic compounds	Aniline and substituted anilines	NA	Aniline
meta_38	38	93.035	TRUE	0.80051	241244	-0.000373635	C6H6O	-H(-)	100	HMDB0000228	Phenol	Benzenoids	Phenols	1-hydroxy-4-unsubstituted benzenoids	Aromatic homomonocyclic compounds	1-hydroxy-4-unsubstituted benzenoids	yes	Phenol
meta_39	39	93.046	TRUE	0.849666	48233.9	-0.000178503	C5H6N2	-H(-)	100	HMDB0033112	Methylpyrazine	Organoheterocyclic compounds	Diazines	Pyrazines	Aromatic heteromonocyclic compounds	Pyrazines	NA	Methylpyrazine
meta_40	40	94.0304	TRUE	0.532244	38558.7	-0.000579921	C5H5NO	-H(-)	100	HMDB0013751	2-Hydroxypyridine	Organoheterocyclic compounds	Pyridines and derivatives	Hydropyridines	Aromatic heteromonocyclic compounds	Pyridinones	NA	2-Hydroxypyridine
meta_41	41	95.0504	TRUE	0.44964	5689.1	-0.000206452	C6H8O	-H(-)	100	HMDB0031545	2-Methyl-2-cyclopenten-1-one	Organooxygen compounds	Carbonyl compounds	Ketones	Aliphatic homomonocyclic compounds	Cyclic ketones	NA	2-Methyl-2-cyclopenten-1-one
meta_42	42	96.046	TRUE	0.183592	3313.54	-0.000483954	C5H7NO	-H(-)	100	HMDB0031339	1-Cyano-2-hydroxy-3-butene	Organic oxygen compounds	Organooxygen compounds	Alcohols and polyols	Aliphatic acyclic compounds	Secondary alcohols	NA	1-Cyano-2-hydroxy-3-butene
meta_43	43	97.0115	TRUE	-0.0515589	26722.9	0.000265611	C5H6S	-H(-)	100	HMDB0033118	2-Methylthiophene	Organoheterocyclic compounds	Heteroaromatic compounds	Not classified	Aromatic heteromonocyclic compounds	Heteroaromatic compounds	NA	2-Methylthiophene
meta_44	44	97.0404	TRUE	0.0613363	5949.81	0.000339403	C4H6N2O	-H(-)	100	HMDB0060768	4-Hydroxymethylpyrazole	Organoheterocyclic compounds	Azoles	Pyrazoles	Aromatic heteromonocyclic compounds	Pyrazoles	NA	4-Hydroxymethylpyrazole
meta_45	45	97.0658	TRUE	0.409922	6493.32	5.5e-05	C6H10O	-H(-)	100	HMDB0003315	Cyclohexanone	Organic oxygen compounds	Organooxygen compounds	Carbonyl compounds	Aliphatic homomonocyclic compounds	Cyclic ketones	NA	Cyclohexanone
meta_46	46	98.0071	TRUE	0.443618	3102.36	-7.62e-05	C4H5NS	-H(-)	100	HMDB0005843	Allyl isothiocyanate	Organosulfur compounds	Isothiocyanates	Not classified	Aliphatic acyclic compounds	Isothiocyanates	NA	Allyl isothiocyanate
meta_47	47	98.0248	TRUE	-0.00137786	14085.9	-8.49e-05	C4H5NO2	-H(-)	100	HMDB0030276	(R)-Dihydromaleimide	Organoheterocyclic compounds	Pyrrolines	Not classified	Aliphatic heteromonocyclic compounds	Pyrrolines	NA	(R)-Dihydromaleimide
meta_48	48	99.0452	TRUE	0.215537	9439.42	-5.79e-05	C5H8O2	-H(-)	100	HMDB0000509	Senecioic acid	Lipids and lipid-like molecules	Fatty Acyls	Fatty acids and conjugates	Aliphatic acyclic compounds	Methyl-branched fatty acids	NA	Senecioic acid
meta_49	49	99.0558	TRUE	0.159088	3949.33	0.000628601	C4H8N2O	-H(-)	100	HMDB0031642	N-Nitroso-pyrrolidine	Organoheterocyclic compounds	Pyrrolidines	Not classified	Aliphatic heteromonocyclic compounds	Pyrrolidines	NA	N-Nitroso-pyrrolidine
meta_50	50	99.082	TRUE	0.351062	3577.38	-0.000427081	C6H12O	-H(-)	100	HMDB0000753	3-Hexanone	Organic oxygen compounds	Organooxygen compounds	Carbonyl compounds	Aliphatic acyclic compounds	Ketones	NA	3-Hexanone
meta_51	51	100.023	TRUE	0.621644	12235.1	-0.000127991	C4H7NS	-H(-)	100	HMDB0029555	4,5-Dihydro-2-methylthiazole	Organoheterocyclic compounds	Azolines	Thiazolines	Aliphatic heteromonocyclic compounds	Thiazolines	NA	4,5-Dihydro-2-methylthiazole
meta_52	52	100.04	TRUE	0.369805	12212.5	-3.24e-05	C4H7NO2	-H(-)	100	HMDB0029387	L-3-Aminodihydro-2(3H)-furanone	Organic acids and derivatives	Carboxylic acids and derivatives	Amino acids, peptides, and analogues	Aliphatic heteromonocyclic compounds	Alpha amino acid esters	NA	L-3-Aminodihydro-2(3H)-furanone
meta_53	53	101.061	TRUE	0.157153	12065.7	0.000142667	C5H10O2	-H(-)	100	HMDB0000718	Isovaleric acid	Lipids and lipid-like molecules	Fatty Acyls	Fatty acids and conjugates	Aliphatic acyclic compounds	Methyl-branched fatty acids	yes	Isovaleric acid
meta_54	54	102.02	TRUE	-0.155917	5722.03	5.26e-05	C3H5NO3	-H(-)	100	HMDB0002455	Pyruvatoxime	Organic nitrogen compounds	Organonitrogen compounds	Oximes	Aliphatic acyclic compounds	Ketoximes	NA	Pyruvatoxime
meta_55	55	102.056	TRUE	0.698549	28197	-0.000238281	C4H9NO2	-H(-)	100	HMDB0000092	Dimethylglycine	Organic acids and derivatives	Carboxylic acids and derivatives	Amino acids, peptides, and analogues	Aliphatic acyclic compounds	Alpha amino acids	yes	Dimethylglycine
meta_56	56	103.04	TRUE	0.737689	40200	3.48e-05	C4H8O3	-H(-)	100	HMDB0000008	2-Hydroxybutyric acid	Organic acids and derivatives	Hydroxy acids and derivatives	Alpha hydroxy acids and derivatives	Aliphatic acyclic compounds	Alpha hydroxy acids and derivatives	NA	2-Hydroxybutyric acid
meta_57	57	104.035	TRUE	0.751434	20696.5	8.75e-05	C3H7NO3	-H(-)	100	HMDB0000187	L-Serine	Organic acids and derivatives	Carboxylic acids and derivatives	Amino acids, peptides, and analogues	Aliphatic acyclic compounds	Serine and derivatives	yes	L-Serine
meta_58	58	105.019	TRUE	0.662229	14951.3	0.000161624	C3H6O4	-H(-)	100	HMDB0000139	Glyceric acid	Organic oxygen compounds	Organooxygen compounds	Carbohydrates and carbohydrate conjugates	Aliphatic acyclic compounds	Sugar acids and derivatives	yes	Glyceric acid
meta_59	59	105.035	TRUE	0.468143	4174.68	-0.000214067	C7H6O	-H(-)	100	HMDB0006115	Benzaldehyde	Benzenoids	Benzene and substituted derivatives	Benzoyl derivatives	Aromatic homomonocyclic compounds	Benzoyl derivatives	NA	Benzaldehyde
meta_60	60	105.056	TRUE	0.658866	2055.95	-0.00012603	C4H10O3	-H(-)	100	HMDB0034778	(2R*,3R*)-1,2,3-Butanetriol	Organic oxygen compounds	Organooxygen compounds	Alcohols and polyols	Aliphatic acyclic compounds	Secondary alcohols	NA	(2R*,3R*)-1,2,3-Butanetriol
meta_61	61	105.071	TRUE	0.579297	2000.89	-0.000432784	C8H10	-H(-)	100	HMDB0059810	m-Xylene	Benzenoids	Benzene and substituted derivatives	Xylenes	Aromatic homomonocyclic compounds	m-Xylenes	NA	m-Xylene
meta_62	62	106.066	TRUE	0.518043	3752.42	-2.63e-05	C7H9N	-H(-)	100	HMDB0029734	3-Ethylpyridine	Organoheterocyclic compounds	Pyridines and derivatives	Not classified	Aromatic heteromonocyclic compounds	Pyridines and derivatives	NA	3-Ethylpyridine
meta_63	63	107.05	TRUE	0.823718	503514	-0.000139437	C7H8O	-H(-)	100	HMDB0001858	p-Cresol	Benzenoids	Phenols	Cresols	Aromatic homomonocyclic compounds	Para cresols	yes	p-Cresol
meta_64	64	108.045	TRUE	0.442896	19360	8.98e-05	C6H7NO	-H(-)	100	HMDB0001169	4-Aminophenol	Benzenoids	Benzene and substituted derivatives	Aniline and substituted anilines	Aromatic homomonocyclic compounds	Aniline and substituted anilines	NA	4-Aminophenol
meta_65	65	108.083	TRUE	0.706557	2783.16	-0.00116494	C7H11N	-H(-)	77	HMDB0029722	1,2,5-Trimethyl-1H-pyrrole	Organoheterocyclic compounds	Pyrroles	Substituted pyrroles	Aromatic heteromonocyclic compounds	N-methylpyrroles	NA	1,2,5-Trimethyl-1H-pyrrole
meta_66	66	109.012	TRUE	-0.300849	13352	0.000197966	C6H6S	-H(-)	100	HMDB0029726	2-Vinylthiophene	Organoheterocyclic compounds	Heteroaromatic compounds	Not classified	Aromatic heteromonocyclic compounds	Heteroaromatic compounds	NA	2-Vinylthiophene
meta_67	67	109.03	TRUE	0.704242	233646	-0.000102514	C6H6O2	-H(-)	100	HMDB0000957	Pyrocatechol	Benzenoids	Phenols	Benzenediols	Aromatic homomonocyclic compounds	Catechols	NA	Pyrocatechol
meta_68	68	110.025	TRUE	0.261426	10115.9	5.98e-05	C5H5NO2	-H(-)	100	HMDB0004230	Pyrrole-2-carboxylic acid	Organoheterocyclic compounds	Pyrroles	Pyrrole carboxylic acids and derivatives	Aromatic heteromonocyclic compounds	Pyrrole 2-carboxylic acids	NA	Pyrrole-2-carboxylic acid
meta_69	69	110.061	TRUE	0.334827	2935.68	-0.000304517	C6H9NO	-H(-)	100	HMDB0031163	N-Acetyl-2,3-dihydro-1H-pyrrole	Organoheterocyclic compounds	Pyrrolines	Not classified	Aliphatic heteromonocyclic compounds	Pyrrolines	NA	N-Acetyl-2,3-dihydro-1H-pyrrole
meta_70	70	110.073	TRUE	0.694583	14400.5	-0.000205128	C5H9N3	-H(-)	100	HMDB0000870	Histamine	Organic nitrogen compounds	Organonitrogen compounds	Amines	Aromatic heteromonocyclic compounds	2-arylethylamines	yes	Histamine
meta_71	71	110.991	TRUE	-0.0451912	5237.78	0.000261979	C5H4OS	-H(-)	100	HMDB0029717	2-Thiophenecarboxaldehyde	Organic oxygen compounds	Organooxygen compounds	Carbonyl compounds	Aromatic heteromonocyclic compounds	Aryl-aldehydes	NA	2-Thiophenecarboxaldehyde
meta_72	72	111.009	TRUE	0.606529	205425	-5.35e-05	C5H4O3	-H(-)	100	HMDB0000444	3-Furoic acid	Organoheterocyclic compounds	Furans	Furoic acid and derivatives	Aromatic heteromonocyclic compounds	Furoic acids	NA	3-Furoic acid
meta_73	73	111.045	TRUE	-0.0183512	10103.2	0.000121105	C6H8O2	-H(-)	100	HMDB0001164	trans-1,2-Dihydrobenzene-1,2-diol	Organic oxygen compounds	Organooxygen compounds	Alcohols and polyols	Aliphatic homomonocyclic compounds	1,2-diols	NA	trans-1,2-Dihydrobenzene-1,2-diol
meta_74	74	111.081	TRUE	0.365785	3844.82	0.00010055	C7H12O	-H(-)	100	HMDB0031483	(Z)-4-Heptenal	Organooxygen compounds	Carbonyl compounds	Aldehydes	Aliphatic acyclic compounds	Medium-chain aldehydes	NA	(Z)-4-Heptenal
meta_75	75	112.041	TRUE	0.546328	11029.9	-0.000334467	C5H7NO2	-H(-)	100	HMDB0001301	1-Pyrroline-5-carboxylic acid	Organic acids and derivatives	Carboxylic acids and derivatives	Amino acids, peptides, and analogues	Aliphatic heteromonocyclic compounds	Alpha amino acids and derivatives	NA	1-Pyrroline-5-carboxylic acid
meta_76	76	112.052	TRUE	0.811672	163494	-0.000303355	C4H7N3O	-H(-)	100	HMDB0000562	Creatinine	Organic acids and derivatives	Carboxylic acids and derivatives	Amino acids, peptides, and analogues	Aliphatic heteromonocyclic compounds	Alpha amino acids and derivatives	yes	Creatinine
meta_77	77	113.025	TRUE	0.795111	75231.7	-0.000634256	C5H6O3	-H(-)	100	HMDB0031859	Norfuraneol	Organoheterocyclic compounds	Dihydrofurans	Furanones	Aliphatic heteromonocyclic compounds	Furanones	NA	Norfuraneol
meta_78	78	113.035	TRUE	0.46467	16167.8	0.000746638	C4H6N2O2	-H(-)	100	HMDB0000076	Dihydrouracil	Organoheterocyclic compounds	Diazines	Pyrimidines and pyrimidine derivatives	Aliphatic heteromonocyclic compounds	Pyrimidones	NA	Dihydrouracil
meta_79	79	113.06	TRUE	0.505221	7581.27	0.000445539	C6H10O2	-H(-)	100	HMDB0000453	Delta-Hexanolactone	Organoheterocyclic compounds	Lactones	Delta valerolactones	Aliphatic heteromonocyclic compounds	Delta valerolactones	NA	Delta-Hexanolactone
meta_80	80	113.073	TRUE	0.27464	3757.17	-0.000486142	C5H10N2O	-H(-)	100	HMDB0000323	3-Amino-2-piperidone	Organic acids and derivatives	Carboxylic acids and derivatives	Amino acids, peptides, and analogues	Aliphatic heteromonocyclic compounds	Alpha amino acid amides	yes	3-Amino-2-piperidone
meta_81	81	113.097	TRUE	0.536138	3083.89	-6.9e-05	C7H14O	-H(-)	100	HMDB0003671	2-Heptanone	Organic oxygen compounds	Organooxygen compounds	Carbonyl compounds	Aliphatic acyclic compounds	Ketones	NA	2-Heptanone
meta_82	82	114.039	TRUE	0.332946	2797.66	-0.000507856	C5H9NS	-H(-)	100	HMDB0031328	1-Isothiocyanatobutane	Organosulfur compounds	Isothiocyanates	Not classified	Aliphatic acyclic compounds	Isothiocyanates	NA	1-Isothiocyanatobutane
meta_83	83	114.056	TRUE	0.80027	246877	-0.000212738	C5H9NO2	-H(-)	100	HMDB0000162	L-Proline	Organic acids and derivatives	Carboxylic acids and derivatives	Amino acids, peptides, and analogues	Aliphatic heteromonocyclic compounds	Proline and derivatives	yes	L-Proline
meta_84	84	115.004	TRUE	0.404368	7469.35	1.75e-05	C4H4O4	-H(-)	100	HMDB0000134	Fumaric acid	Organic acids and derivatives	Carboxylic acids and derivatives	Dicarboxylic acids and derivatives	Aliphatic acyclic compounds	Dicarboxylic acids and derivatives	yes	Fumaric acid
meta_85	85	115.04	TRUE	0.60675	15037.4	-0.000159932	C5H8O3	-H(-)	100	HMDB0000019	alpha-Ketoisovaleric acid	Organic acids and derivatives	Keto acids and derivatives	Short-chain keto acids and derivatives	Aliphatic acyclic compounds	Short-chain keto acids and derivatives	NA	alpha-Ketoisovaleric acid
meta_86	86	115.051	TRUE	0.290466	3699.94	0.000725782	C4H8N2O2	-H(-)	100	HMDB0060496	N,N'-Diacetylhydrazine	Organic nitrogen compounds	Organonitrogen compounds	Hydrazines and derivatives	Aliphatic acyclic compounds	Azines	NA	N,N'-Diacetylhydrazine
meta_87	87	115.077	TRUE	0.0568848	9407.98	-0.000245594	C6H12O2	-H(-)	100	HMDB0000535	Caproic acid	Lipids and lipid-like molecules	Fatty Acyls	Fatty acids and conjugates	Aliphatic acyclic compounds	Medium-chain fatty acids	yes	Caproic acid
meta_88	88	115.088	TRUE	0.387568	3066.14	-0.000298362	C5H12N2O	-H(-)	100	HMDB0012176	5-Aminopentanamide	Organic acids and derivatives	Carboxylic acids and derivatives	Amino acids, peptides, and analogues	Aliphatic acyclic compounds	Delta amino acids and derivatives	NA	5-Aminopentanamide
meta_89	89	116.018	TRUE	0.537036	4360.6	-7.32e-05	C4H7NOS	-H(-)	100	HMDB0002287	Homocysteine thiolactone	Organic acids and derivatives	Carboxylic acids and derivatives	Amino acids, peptides, and analogues	Aliphatic heteromonocyclic compounds	Alpha amino acids and derivatives	NA	Homocysteine thiolactone
meta_90	90	116.036	TRUE	0.353849	8559.38	-0.000190625	C4H7NO3	-H(-)	100	HMDB0000532	Acetylglycine	Organic acids and derivatives	Carboxylic acids and derivatives	Amino acids, peptides, and analogues	Aliphatic acyclic compounds	N-acyl-alpha amino acids	yes	Acetylglycine
meta_91	91	116.051	TRUE	0.857424	63060.7	-0.000104787	C8H7N	-H(-)	100	HMDB0000738	Indole	Organoheterocyclic compounds	Indoles and derivatives	Indoles	Aromatic heteropolycyclic compounds	Indoles	yes	Indole
meta_92	92	116.072	TRUE	0.918236	291477	0.000128287	C5H11NO2	-H(-)	100	HMDB0000043	Betaine	Organic acids and derivatives	Carboxylic acids and derivatives	Amino acids, peptides, and analogues	Aliphatic acyclic compounds	Alpha amino acids	yes	Betaine
meta_93	93	117.02	TRUE	0.442366	15147.2	-0.000405747	C4H6O4	-H(-)	100	HMDB0000202	Methylmalonic acid	Organic acids and derivatives	Carboxylic acids and derivatives	Dicarboxylic acids and derivatives	Aliphatic acyclic compounds	Dicarboxylic acids and derivatives	NA	Methylmalonic acid
meta_94	94	117.035	TRUE	0.44124	8151.83	-0.000347396	C8H6O	-H(-)	100	HMDB0030968	2,4,6-Octatriyn-1-ol	Lipids and lipid-like molecules	Fatty Acyls	Fatty alcohols	Aliphatic acyclic compounds	Fatty alcohols	NA	2,4,6-Octatriyn-1-ol
meta_95	95	117.056	TRUE	0.719068	40589.6	-8.27e-05	C5H10O3	-H(-)	100	HMDB0000351	3-Hydroxy-2-methyl-[R-(R,S)]-butanoic acid	Lipids and lipid-like molecules	Fatty Acyls	Fatty acids and conjugates	Aliphatic acyclic compounds	Hydroxy fatty acids	NA	3-Hydroxy-2-methyl-[R-(R,S)]-butanoic acid
meta_96	96	117.066	TRUE	-0.190825	7298.64	0.00104591	C4H10N2O2	-H(-)	93	HMDB0002362	2,4-Diaminobutyric acid	Organic acids and derivatives	Carboxylic acids and derivatives	Amino acids, peptides, and analogues	Aliphatic acyclic compounds	Alpha amino acids	NA	2,4-Diaminobutyric acid
meta_97	97	117.075	TRUE	0.611804	21883.9	-0.000644787	C6H14S	-H(-)	100	HMDB0029579	Diisopropyl sulfide	Organosulfur compounds	Thioethers	Dialkylthioethers	Aliphatic acyclic compounds	Dialkylthioethers	NA	Diisopropyl sulfide
meta_98	98	118.03	TRUE	0.190808	5845.41	-9.63e-05	C7H5NO	-H(-)	100	HMDB0062270	1,2-Diacylglycerol-LD-PI-pool	Benzenoids	Benzene and substituted derivatives	Not classified	Aromatic homomonocyclic compounds	Benzene and substituted derivatives	NA	1,2-Diacylglycerol-LD-PI-pool
meta_99	99	118.051	TRUE	0.667038	39277.9	0.000136648	C4H9NO3	-H(-)	100	HMDB0000167	L-Threonine	Organic acids and derivatives	Carboxylic acids and derivatives	Amino acids, peptides, and analogues	Aliphatic acyclic compounds	L-alpha-amino acids	yes	L-Threonine
meta_100	100	119.036	TRUE	0.842304	5.08781e+06	-7.97e-05	C5H4N4	-H(-)	90	HMDB0001366	Purine	Organoheterocyclic compounds	Imidazopyrimidines	Purines and purine derivatives	Aromatic heteropolycyclic compounds	Purines and purine derivatives	yes	Purine
meta_101	101	119.049	TRUE	0.888977	260754	0.000984243	C8H8O	-H(-)	100	HMDB0004072	4-Hydroxystyrene	Benzenoids	Benzene and substituted derivatives	Styrenes	Aromatic homomonocyclic compounds	Styrenes	yes	4-Hydroxystyrene
meta_102	102	120.013	TRUE	0.394169	6355.83	-0.000117715	C3H7NO2S	-H(-)	100	HMDB0000574	L-Cysteine	Organic acids and derivatives	Carboxylic acids and derivatives	Amino acids, peptides, and analogues	Aliphatic acyclic compounds	Cysteine and derivatives	yes	L-Cysteine
meta_103	103	120.998	TRUE	0.481599	3679.04	-0.00176981	C3H6O3S	-H(-)	29	HMDB0002127	3-Mercaptolactic acid	Organic oxygen compounds	Organooxygen compounds	Carbohydrates and carbohydrate conjugates	Aliphatic acyclic compounds	Monosaccharides	NA	3-Mercaptolactic acid
meta_104	104	121.029	TRUE	-0.313245	53032.1	1.69e-05	C7H6O2	-H(-)	100	HMDB0001870	Benzoic acid	Benzenoids	Benzene and substituted derivatives	Benzoic acids and derivatives	Aromatic homomonocyclic compounds	Benzoic acids	yes	Benzoic acid
meta_105	105	121.041	TRUE	0.26623	13196.9	-0.000646954	C6H6N2O	-H(-)	100	HMDB0001406	Niacinamide	Organoheterocyclic compounds	Pyridines and derivatives	Pyridinecarboxylic acids and derivatives	Aromatic heteromonocyclic compounds	Nicotinamides	yes	Niacinamide
meta_106	106	121.066	TRUE	0.342305	9410.62	5.91e-05	C8H10O	-H(-)	100	HMDB0029306	4-Ethylphenol	Benzenoids	Phenols	1-hydroxy-2-unsubstituted benzenoids	Aromatic homomonocyclic compounds	1-hydroxy-2-unsubstituted benzenoids	NA	4-Ethylphenol
meta_107	107	121.077	TRUE	0.194918	3251.1	8.78e-05	C7H10N2	-H(-)	100	HMDB0031844	Trimethylpyrazine	Organoheterocyclic compounds	Diazines	Pyrazines	Aromatic heteromonocyclic compounds	Pyrazines	NA	Trimethylpyrazine
meta_108	108	121.102	TRUE	0.543832	3024.73	-1.62e-05	C9H14	-H(-)	100	HMDB0038140	Santene	Hydrocarbons	Polycyclic hydrocarbons	Not classified	Aliphatic homopolycyclic compounds	Polycyclic hydrocarbons	NA	Santene
meta_109	109	122.025	TRUE	-0.125922	9719.89	-0.000396166	C6H5NO2	-H(-)	100	HMDB0001488	Nicotinic acid	Organoheterocyclic compounds	Pyridines and derivatives	Pyridinecarboxylic acids and derivatives	Aromatic heteromonocyclic compounds	Pyridinecarboxylic acids	NA	Nicotinic acid
meta_110	110	122.061	TRUE	0.233062	5315.52	-0.000165882	C7H9NO	-H(-)	100	HMDB0029300	p-Anisidine	Benzenoids	Benzene and substituted derivatives	Anilines	Aromatic homomonocyclic compounds	Methoxyanilines	NA	p-Anisidine
meta_111	111	123.045	TRUE	0.726033	86493.6	5.46e-05	C7H8O2	-H(-)	100	HMDB0000873	4-Methylcatechol	Benzenoids	Phenols	Benzenediols	Aromatic homomonocyclic compounds	Catechols	NA	4-Methylcatechol
meta_112	112	123.081	TRUE	-0.000593442	7820.11	0.000425708	C8H12O	-H(-)	100	HMDB0031414	2,3-Dimethyl-2-cyclohexen-1-one	Organooxygen compounds	Carbonyl compounds	Ketones	Aliphatic homomonocyclic compounds	Cyclic ketones	NA	2,3-Dimethyl-2-cyclohexen-1-one
meta_113	113	124.007	TRUE	0.846612	99360	-4.22e-05	C2H7NO3S	-H(-)	100	HMDB0000251	Taurine	Organic acids and derivatives	Organic sulfonic acids and derivatives	Organosulfonic acids and derivatives	Aliphatic acyclic compounds	Organosulfonic acids	yes	Taurine
meta_114	114	124.017	TRUE	0.724633	36347.9	0.000358088	C2H8NO3P	-H(-)	100	HMDB0011747	Ciliatine	Organic acids and derivatives	Organic phosphonic acids and derivatives	Organic phosphonic acids	Aliphatic acyclic compounds	Organic phosphonic acids	NA	Ciliatine
meta_115	115	124.075	TRUE	0.349576	3739.17	0.00139183	C7H11NO	-H(-)	53	HMDB0030345	6-Acetyl-1,2,3,4-tetrahydropyridine	Organoheterocyclic compounds	Pyridines and derivatives	Hydropyridines	Aliphatic heteromonocyclic compounds	Tetrahydropyridines	NA	6-Acetyl-1,2,3,4-tetrahydropyridine
meta_116	116	124.992	TRUE	0.560651	19059.3	-0.000385693	C2H6O4S	-H(-)	100	HMDB0003903	2-Hydroxyethanesulfonate	Organic acids and derivatives	Organic sulfonic acids and derivatives	Organosulfonic acids and derivatives	Aliphatic acyclic compounds	Organosulfonic acids	NA	2-Hydroxyethanesulfonate
meta_117	117	125.007	TRUE	-0.0777275	14946.7	-0.000278365	C6H6OS	-H(-)	100	HMDB0032431	5-Methyl-2-thiophenecarboxaldehyde	Organoheterocyclic compounds	Thiophenes	2,5-disubstituted thiophenes	Aromatic heteromonocyclic compounds	2,5-disubstituted thiophenes	NA	5-Methyl-2-thiophenecarboxaldehyde
meta_118	118	125.025	TRUE	0.446233	55054.2	-0.000258215	C6H6O3	-H(-)	100	HMDB0013674	1,2,3-Trihydroxybenzene	Benzenoids	Benzene and substituted derivatives	Phenols and derivatives	Aromatic homomonocyclic compounds	Pyrogallols and derivatives	NA	1,2,3-Trihydroxybenzene
meta_119	119	125.097	TRUE	0.202454	5140.92	-0.000892365	C6H12N3	-H(-)	100	HMDB0062574	N(tele)-methylhistaminium	Organic nitrogen compounds	Organonitrogen compounds	Amines	Aromatic heteromonocyclic compounds	Aralkylamines	NA	N(tele)-methylhistaminium
meta_120	120	126.906	TRUE	0.45359	10947.3	-0.00053207	HI	-H(-)	25	HMDB0059634	I(-)	Homogeneous non-metal compounds	Halogen organides	Halogen hydrides	Not classified	Halogen hydrides	NA	I(-)
meta_121	121	127.003	TRUE	-0.115503	6102.67	0.000456089	C5H4O4	-H(-)	100	HMDB0059784	5-Hydroxy-2-furoic acid	Organoheterocyclic compounds	Furans	Furoic acid and derivatives	Aromatic heteromonocyclic compounds	Furoic acids	NA	5-Hydroxy-2-furoic acid
meta_122	122	127.04	TRUE	-0.0416163	9736.18	-1.81e-05	C6H8O3	-H(-)	100	HMDB0031303	Osmundalactone	Organoheterocyclic compounds	Pyrans	Pyranones and derivatives	Aliphatic heteromonocyclic compounds	Dihydropyranones	NA	Osmundalactone
meta_123	123	127.052	TRUE	0.830784	117733	-0.000473228	C5H8N2O2	-H(-)	100	HMDB0000079	Dihydrothymine	Organoheterocyclic compounds	Diazines	Pyrimidines and pyrimidine derivatives	Aliphatic heteromonocyclic compounds	Hydropyrimidines	yes	Dihydrothymine
meta_124	124	128.019	TRUE	0.128954	2820.39	-0.0014237	C5H7NOS	-H(-)	51	HMDB0033561	2-Acetyl-4,5-dihydrothiazole	Organoheterocyclic compounds	Azolines	Thiazolines	Aliphatic heteromonocyclic compounds	Thiazolines	NA	2-Acetyl-4,5-dihydrothiazole
meta_125	125	128.035	TRUE	0.869486	202588	-0.000117983	C5H7NO3	-H(-)	100	HMDB0000267	Pyroglutamic acid	Organic acids and derivatives	Carboxylic acids and derivatives	Amino acids, peptides, and analogues	Aliphatic heteromonocyclic compounds	Alpha amino acids and derivatives	yes	Pyroglutamic acid
meta_126	126	128.072	TRUE	0.46156	18792	2.42e-05	C6H11NO2	-H(-)	100	HMDB0000070	Pipecolic acid	Organic acids and derivatives	Carboxylic acids and derivatives	Amino acids, peptides, and analogues	Aliphatic heteromonocyclic compounds	Alpha amino acids	yes	Pipecolic acid
meta_127	127	129	TRUE	0.50891	2996.74	0.00125077	C5H6O2S	-H(-)	67	HMDB0033548	4-Hydroxy-5-methyl-3(2H)-thiophenone	Organic acids and derivatives	Vinylogous thioesters	Not classified	Aliphatic heteromonocyclic compounds	Vinylogous thioesters	NA	4-Hydroxy-5-methyl-3(2H)-thiophenone
meta_128	128	129.019	TRUE	0.649313	40639.1	-0.00014889	C5H6O4	-H(-)	100	HMDB0000620	Glutaconic acid	Organic acids and derivatives	Carboxylic acids and derivatives	Dicarboxylic acids and derivatives	Aliphatic acyclic compounds	Dicarboxylic acids and derivatives	NA	Glutaconic acid
meta_129	129	129.039	TRUE	0.648185	15247.6	-0.000705737	C6H10OS	-H(-)	100	HMDB0031370	2-[(Methylthio)methyl]-2-butenal	Organic oxygen compounds	Organooxygen compounds	Carbonyl compounds	Aliphatic acyclic compounds	Enals	NA	2-[(Methylthio)methyl]-2-butenal
meta_130	130	129.092	TRUE	0.343293	7146.91	0.00026077	C7H14O2	-H(-)	100	HMDB0000666	Heptanoic acid	Lipids and lipid-like molecules	Fatty Acyls	Fatty acids and conjugates	Aliphatic acyclic compounds	Medium-chain fatty acids	yes	Heptanoic acid
meta_131	131	129.115	TRUE	0.504555	3549.4	-0.000245391	C5H14N4	-H(-)	100	HMDB0001432	Agmatine	Organic nitrogen compounds	Organonitrogen compounds	Guanidines	Aliphatic acyclic compounds	Guanidines	NA	Agmatine
meta_132	132	130.051	TRUE	0.689372	23643.9	3.06e-05	C5H9NO3	-H(-)	100	HMDB0000725	4-Hydroxyproline	Organic acids and derivatives	Carboxylic acids and derivatives	Amino acids, peptides, and analogues	Aliphatic heteromonocyclic compounds	Proline and derivatives	NA	4-Hydroxyproline
meta_133	133	130.066	TRUE	0.815672	31806.7	-0.000169838	C9H9N	-H(-)	100	HMDB0000466	3-Methylindole	Organoheterocyclic compounds	Indoles and derivatives	Indoles	Aromatic heteropolycyclic compounds	3-methylindoles	NA	3-Methylindole
meta_134	134	130.088	TRUE	0.949989	525557	-0.000243816	C6H13NO2	-H(-)	100	HMDB0000172	L-Isoleucine	Organic acids and derivatives	Carboxylic acids and derivatives	Amino acids, peptides, and analogues	Aliphatic acyclic compounds	Isoleucine and derivatives	yes	L-Isoleucine
meta_135	135	131.035	TRUE	0.426117	17045.5	-0.00050246	C5H8O4	-H(-)	100	HMDB0000576	Monoethyl malonic acid	Organic acids and derivatives	Carboxylic acids and derivatives	Dicarboxylic acids and derivatives	Aliphatic acyclic compounds	Dicarboxylic acids and derivatives	NA	Monoethyl malonic acid
meta_136	136	131.046	TRUE	0.756843	19323.9	5.56e-05	C4H8N2O3	-H(-)	100	HMDB0000026	Ureidopropionic acid	Organic acids and derivatives	Organic carbonic acids and derivatives	Ureas	Aliphatic acyclic compounds	Ureas	yes	Ureidopropionic acid
meta_137	137	131.06	TRUE	0.444949	5212.94	0.00157627	C8H8N2	-H(-)	40	HMDB0033171	1-Methylpyrrolo[1,2-a]pyrazine	Organoheterocyclic compounds	Pyrrolopyrazines	Not classified	Aromatic heteropolycyclic compounds	Pyrrolopyrazines	NA	1-Methylpyrrolo[1,2-a]pyrazine
meta_138	138	131.071	TRUE	0.568381	13598.6	-3.47e-06	C6H12O3	-H(-)	100	HMDB0000317	2-Hydroxy-3-methylpentanoic acid	Lipids and lipid-like molecules	Fatty Acyls	Fatty acids and conjugates	Aliphatic acyclic compounds	Hydroxy fatty acids	yes	2-Hydroxy-3-methylpentanoic acid
meta_139	139	131.083	TRUE	0.717603	161277	-0.000308934	C5H12N2O2	-H(-)	100	HMDB0000214	Ornithine	Organic acids and derivatives	Carboxylic acids and derivatives	Amino acids, peptides, and analogues	Aliphatic acyclic compounds	L-alpha-amino acids	yes	Ornithine
meta_140	140	131.995	TRUE	0.387562	3090.63	-0.000297301	C4H7NS2	-H(-)	100	HMDB0038442	1-Isothiocyanato-2-(methylthio)ethane	Organosulfur compounds	Isothiocyanates	Not classified	Aliphatic acyclic compounds	Isothiocyanates	NA	1-Isothiocyanato-2-(methylthio)ethane
meta_141	141	132.03	TRUE	0.51714	19465.1	-0.000116	C4H7NO4	-H(-)	100	HMDB0000191	L-Aspartic acid	Organic acids and derivatives	Carboxylic acids and derivatives	Amino acids, peptides, and analogues	Aliphatic acyclic compounds	Aspartic acid and derivatives	yes	L-Aspartic acid
meta_142	142	132.046	TRUE	0.597889	9708.22	-0.000297769	C8H7NO	-H(-)	100	HMDB0004094	Indoxyl	Organoheterocyclic compounds	Indoles and derivatives	Hydroxyindoles	Aromatic heteropolycyclic compounds	Hydroxyindoles	NA	Indoxyl
meta_143	143	132.066	TRUE	0.370327	7151.15	0.000268215	C5H11NO3	-H(-)	100	HMDB0031658	L-2-Amino-5-hydroxypentanoic acid	Organic acids and derivatives	Carboxylic acids and derivatives	Amino acids, peptides, and analogues	Aliphatic acyclic compounds	Alpha amino acids	NA	L-2-Amino-5-hydroxypentanoic acid
meta_144	144	132.924	TRUE	-0.419142	5445.39	0.00079541	C3H2S3	-H(-)	100	HMDB0035702	3H-1,2-Dithiole-3-thione	Organoheterocyclic compounds	Dithioles	1,2-dithioles	Aromatic heteromonocyclic compounds	1,2-dithiole-3-thiones	NA	3H-1,2-Dithiole-3-thione
meta_145	145	133.015	TRUE	0.610788	22725.3	-0.000534746	C4H6O5	-H(-)	100	HMDB0000156	L-Malic acid	Organic acids and derivatives	Hydroxy acids and derivatives	Beta hydroxy acids and derivatives	Aliphatic acyclic compounds	Beta hydroxy acids and derivatives	yes	L-Malic acid
meta_146	146	133.03	TRUE	0.239027	5503.64	-2.59e-05	C8H6O2	-H(-)	100	HMDB0032469	Phthalide	Organoheterocyclic compounds	Isobenzofurans	Isobenzofuranones	Aromatic heteropolycyclic compounds	Phthalides	NA	Phthalide
meta_147	147	133.051	TRUE	0.441263	12231.4	-9.37e-05	C5H10O4	-H(-)	100	HMDB0000421	2,3-Dihydroxyvaleric acid	Lipids and lipid-like molecules	Fatty Acyls	Fatty acids and conjugates	Aliphatic acyclic compounds	Hydroxy fatty acids	NA	2,3-Dihydroxyvaleric acid
meta_148	148	133.066	TRUE	0.722398	42994.4	-0.000324964	C9H10O	-H(-)	100	HMDB0029639	(4-Methylphenyl)acetaldehyde	Benzenoids	Benzene and substituted derivatives	Phenylacetaldehydes	Aromatic homomonocyclic compounds	Phenylacetaldehydes	NA	(4-Methylphenyl)acetaldehyde
meta_149	149	134.007	TRUE	0.206539	2970.54	-0.000259596	C7H5NS	-H(-)	100	HMDB0032930	Benzothiazole	Organoheterocyclic compounds	Benzothiazoles	Not classified	Aromatic heteropolycyclic compounds	Benzothiazoles	NA	Benzothiazole
meta_150	150	134.025	TRUE	0.29249	4908.64	-0.000237364	C7H5NO2	-H(-)	100	HMDB0032931	2-Benzoxazolol	Organoheterocyclic compounds	Benzoxazoles	Benzoxazolones	Aromatic heteropolycyclic compounds	Benzoxazolones	NA	2-Benzoxazolol
meta_151	151	134.047	TRUE	0.255272	12387.7	-0.000948393	C4H9NO4	-H(-)	100	HMDB0029389	(+)-threo-2-Amino-3,4-dihydroxybutanoic acid	Organic acids and derivatives	Carboxylic acids and derivatives	Amino acids, peptides, and analogues	Aliphatic acyclic compounds	Alpha amino acids	NA	(+)-threo-2-Amino-3,4-dihydroxybutanoic acid
meta_152	152	134.061	TRUE	0.757751	38958.8	-4.74e-05	C8H9NO	-H(-)	100	HMDB0001250	N-Acetylarylamine	Benzenoids	Benzene and substituted derivatives	Not classified	Aromatic homomonocyclic compounds	Benzene and substituted derivatives	NA	N-Acetylarylamine
meta_153	153	135.031	TRUE	0.845612	109636	-0.000611804	C4H8O5	-H(-)	100	HMDB0000613	Erythronic acid	Organic oxygen compounds	Organooxygen compounds	Carbohydrates and carbohydrate conjugates	Aliphatic acyclic compounds	Sugar acids and derivatives	yes	Erythronic acid
meta_154	154	135.045	TRUE	0.615271	69630.3	-2.55e-05	C8H8O2	-H(-)	100	HMDB0000209	Phenylacetic acid	Benzenoids	Benzene and substituted derivatives	Not classified	Aromatic homomonocyclic compounds	Benzene and substituted derivatives	NA	Phenylacetic acid
meta_155	155	135.057	TRUE	0.538381	8917.19	-0.000419003	C7H8N2O	-H(-)	100	HMDB0003152	N-Methylnicotinamide	Organoheterocyclic compounds	Pyridines and derivatives	Pyridinecarboxylic acids and derivatives	Aromatic heteromonocyclic compounds	Nicotinamides	NA	N-Methylnicotinamide
meta_156	156	135.081	TRUE	0.474995	7583.37	9.72e-05	C9H12O	-H(-)	100	HMDB0029667	2,3,6-Trimethylphenol	Benzenoids	Benzene and substituted derivatives	Phenols and derivatives	Aromatic homomonocyclic compounds	Ortho cresols	NA	2,3,6-Trimethylphenol
meta_157	157	136.038	TRUE	0.346626	9894.84	0.00197745	C7H7NO2	-H(-)	21	HMDB0000875	Trigonelline	Alkaloids and derivatives	Not classified	Not classified	Aromatic heteromonocyclic compounds	Alkaloids and derivatives	yes	Trigonelline
meta_158	158	136.064	TRUE	0.338138	2505.52	-5.69e-05	C7H9N2O	-H(-)	100	HMDB0000699	1-Methylnicotinamide	Organoheterocyclic compounds	Pyridines and derivatives	Pyridinecarboxylic acids and derivatives	Aromatic heteromonocyclic compounds	Nicotinamides	yes	1-Methylnicotinamide
meta_159	159	136.077	TRUE	0.379985	4220.08	0.000215191	C8H11NO	-H(-)	100	HMDB0000306	Tyramine	Benzenoids	Benzene and substituted derivatives	Phenethylamines	Aromatic homomonocyclic compounds	Phenethylamines	NA	Tyramine
meta_160	160	136.957	TRUE	0.0961289	2648.69	-0.00104614	C3H6S3	-H(-)	93	HMDB0036573	1,3,5-Trithiane	Organoheterocyclic compounds	Trithianes	Not classified	Aliphatic heteromonocyclic compounds	Trithianes	NA	1,3,5-Trithiane
meta_161	161	137.025	TRUE	0.0959761	59705.5	-0.000764411	C7H6O3	-H(-)	100	HMDB0000500	4-Hydroxybenzoic acid	Benzenoids	Benzene and substituted derivatives	Benzoic acids and derivatives	Aromatic homomonocyclic compounds	Hydroxybenzoic acid derivatives	yes	4-Hydroxybenzoic acid
meta_162	162	137.035	TRUE	0.307984	18586.4	0.000288029	C6H6N2O2	-H(-)	100	HMDB0000301	Urocanic acid	Organoheterocyclic compounds	Azoles	Imidazoles	Aromatic heteromonocyclic compounds	Imidazolyl carboxylic acids and derivatives	NA	Urocanic acid
meta_163	163	137.061	TRUE	0.456758	13227.2	0.00018236	C8H10O2	-H(-)	100	HMDB0004284	Tyrosol	Benzenoids	Phenols	Tyrosols and derivatives	Aromatic homomonocyclic compounds	Tyrosols	NA	Tyrosol
meta_164	164	137.097	TRUE	0.433889	4200.42	-5.82e-05	C9H14O	-H(-)	100	HMDB0013824	2-Pentylfuran	Organoheterocyclic compounds	Heteroaromatic compounds	Not classified	Aromatic heteromonocyclic compounds	Heteroaromatic compounds	NA	2-Pentylfuran
meta_165	165	138.039	TRUE	0.178869	3666.68	-0.000817861	C7H9NS	-H(-)	100	HMDB0037285	2,4-Dimethyl-5-vinylthiazole	Organoheterocyclic compounds	Azoles	Thiazoles	Aromatic heteromonocyclic compounds	2,4,5-trisubstituted thiazoles	NA	2,4-Dimethyl-5-vinylthiazole
meta_166	166	138.056	TRUE	0.580919	18473.5	-0.000391936	C7H9NO2	-H(-)	100	HMDB0012153	3,4-Dihydroxybenzylamine	Benzenoids	Phenols	Benzenediols	Aromatic homomonocyclic compounds	Catechols	NA	3,4-Dihydroxybenzylamine
meta_167	167	138.066	TRUE	0.224378	3960.95	0.00119529	C6H9N3O	-H(-)	73	HMDB0012234	Histidinal	Organic nitrogen compounds	Organonitrogen compounds	Amines	Aromatic heteromonocyclic compounds	Aralkylamines	NA	Histidinal
meta_168	168	139.059	TRUE	0.0925166	9200.91	-0.00045215	C8H12S	-H(-)	100	HMDB0040236	3,4-Diethylthiophene	Organoheterocyclic compounds	Heteroaromatic compounds	Not classified	Aromatic heteromonocyclic compounds	Heteroaromatic compounds	NA	3,4-Diethylthiophene
meta_169	169	139.076	TRUE	0.412364	6573.89	0.000261335	C8H12O2	-H(-)	100	HMDB0032311	2,4-Hexadienyl acetate	Organic acids and derivatives	Carboxylic acids and derivatives	Carboxylic acid derivatives	Aliphatic acyclic compounds	Acetate salts	NA	2,4-Hexadienyl acetate
meta_170	170	139.113	TRUE	0.400181	4724.91	0.000329387	C9H16O	-H(-)	100	HMDB0030957	(3Z,6Z)-3,6-Nonadien-1-ol	Lipids and lipid-like molecules	Fatty Acyls	Fatty alcohols	Aliphatic acyclic compounds	Fatty alcohols	NA	(3Z,6Z)-3,6-Nonadien-1-ol
meta_171	171	139.976	TRUE	-0.348829	19998.2	-0.000469141	CH4NO5P	-H(-)	100	HMDB0001096	Carbamoyl phosphate	Organic acids and derivatives	Organic phosphoric acids and derivatives	Not classified	Aliphatic acyclic compounds	Organic phosphoric acids and derivatives	NA	Carbamoyl phosphate
meta_172	172	139.994	TRUE	-0.159952	7726.66	-9.14e-05	C2H8NO2PS	-H(-)	100	HMDB0031803	(±)-Methamidophos	Organophosphorus compounds	Organothiophosphorus compounds	Not classified	Aliphatic acyclic compounds	Organothiophosphorus compounds	NA	(±)-Methamidophos
meta_173	173	140.035	TRUE	0.125236	8593.62	0.000222484	C6H7NO3	-H(-)	100	HMDB0001280	2-Aminomuconic acid semialdehyde	Organic acids and derivatives	Carboxylic acids and derivatives	Amino acids, peptides, and analogues	Aliphatic acyclic compounds	Alpha amino acids	NA	2-Aminomuconic acid semialdehyde
meta_174	174	140.072	TRUE	0.188928	3609.21	0.00012732	C7H11NO2	-H(-)	100	HMDB0014731	Ethosuximide	Organoheterocyclic compounds	Pyrrolidines	Pyrrolidones	Aliphatic heteromonocyclic compounds	Pyrrolidine-2-ones	NA	Ethosuximide
meta_175	175	141.055	TRUE	0.0997854	5183.63	0.0006247	C7H10O3	-H(-)	100	HMDB0033551	5-Ethyl-3-hydroxy-4-methyl-2(5H)-furanone	Organoheterocyclic compounds	Dihydrofurans	Furanones	Aliphatic heteromonocyclic compounds	Butenolides	NA	5-Ethyl-3-hydroxy-4-methyl-2(5H)-furanone
meta_176	176	141.071	TRUE	0.391797	5133.82	-0.000191281	C11H10	-H(-)	100	HMDB0032860	1-Methylnaphthalene	Benzenoids	Naphthalenes	Not classified	Aromatic homopolycyclic compounds	Naphthalenes	NA	1-Methylnaphthalene
meta_177	177	141.092	TRUE	0.184472	7987.76	3.06e-06	C8H14O2	-H(-)	100	HMDB0000392	2-Octenoic acid	Lipids and lipid-like molecules	Fatty Acyls	Fatty acids and conjugates	Aliphatic acyclic compounds	Medium-chain fatty acids	NA	2-Octenoic acid
meta_178	178	141.128	TRUE	0.288598	2983.92	0.000637552	C9H18O	-H(-)	100	HMDB0013821	2-Methyl-4-heptanone	Organic oxygen compounds	Organooxygen compounds	Carbonyl compounds	Aliphatic acyclic compounds	Ketones	NA	2-Methyl-4-heptanone
meta_179	179	142.051	TRUE	0.252325	8104.56	0.000111741	C6H9NO3	-H(-)	100	HMDB0000894	Vinylacetylglycine	Organic acids and derivatives	Carboxylic acids and derivatives	Amino acids, peptides, and analogues	Aliphatic acyclic compounds	N-acyl-alpha amino acids	NA	Vinylacetylglycine
meta_180	180	142.066	TRUE	0.84751	38431.7	-0.000150607	C10H9N	-H(-)	100	HMDB0033115	6-Methylquinoline	Organoheterocyclic compounds	Quinolines and derivatives	Not classified	Aromatic heteropolycyclic compounds	Quinolines and derivatives	NA	6-Methylquinoline
meta_181	181	142.087	TRUE	0.395418	5231.65	0.000112505	C7H13NO2	-H(-)	100	HMDB0004827	Proline betaine	Organic acids and derivatives	Carboxylic acids and derivatives	Amino acids, peptides, and analogues	Aliphatic heteromonocyclic compounds	Proline and derivatives	yes	Proline betaine
meta_182	182	143.035	TRUE	0.537778	22775.9	-0.000137394	C6H8O4	-H(-)	100	HMDB0000393	3-Hexenedioic acid	Lipids and lipid-like molecules	Fatty Acyls	Fatty acids and conjugates	Aliphatic acyclic compounds	Medium-chain fatty acids	NA	3-Hexenedioic acid
meta_183	183	143.05	TRUE	0.522057	10151.7	-4.69e-05	C10H8O	-H(-)	100	HMDB0006215	Naphthalene epoxide	Benzenoids	Naphthalenes	Not classified	Aromatic heteropolycyclic compounds	Naphthalenes	NA	Naphthalene epoxide
meta_184	184	143.06	TRUE	0.328893	3544.16	0.00169736	C9H8N2	-H(-)	33	HMDB0033178	5-Methylquinoxaline	Organoheterocyclic compounds	Naphthyridines	Quinoxalines	Aromatic heteropolycyclic compounds	Quinoxalines	NA	5-Methylquinoxaline
meta_185	185	143.071	TRUE	0.330201	12313.2	0.000210976	C7H12O3	-H(-)	100	HMDB0001988	4-Hydroxycyclohexylcarboxylic acid	Organic oxygen compounds	Organooxygen compounds	Alcohols and polyols	Aliphatic homomonocyclic compounds	Cyclohexanols	NA	4-Hydroxycyclohexylcarboxylic acid
meta_186	186	143.082	TRUE	0.158219	129423	0.000286223	C6H12N2O2	-H(-)	100	HMDB0060385	4-Amino-1-piperidinecarboxylic acid	Organoheterocyclic compounds	Piperidines	Piperidinecarboxylic acids and derivatives	Aliphatic heteromonocyclic compounds	Piperidinecarboxylic acids	NA	4-Amino-1-piperidinecarboxylic acid
meta_187	187	143.108	TRUE	0.568424	30416.6	-0.000253298	C8H16O2	-H(-)	100	HMDB0000482	Caprylic acid	Lipids and lipid-like molecules	Fatty Acyls	Fatty acids and conjugates	Aliphatic acyclic compounds	Medium-chain fatty acids	yes	Caprylic acid
meta_188	188	143.13	TRUE	0.354463	4927.32	0.000560803	C6H16N4	-H(-)	100	HMDB0031505	Homoagmatine	Organic nitrogen compounds	Organonitrogen compounds	Guanidines	Aliphatic acyclic compounds	Guanidines	NA	Homoagmatine
meta_189	189	143.144	TRUE	0.460641	4024.38	0.000452625	C9H20O	-H(-)	100	HMDB0031153	Diisobutylcarbinol	Organooxygen compounds	Alcohols and polyols	Secondary alcohols	Aliphatic acyclic compounds	Secondary alcohols	NA	Diisobutylcarbinol
meta_190	190	144.031	TRUE	0.470936	5015.47	-0.000774124	C5H7NO4	-H(-)	100	HMDB0001552	2-Keto-glutaramic acid	Organic acids and derivatives	Keto acids and derivatives	Short-chain keto acids and derivatives	Aliphatic acyclic compounds	Short-chain keto acids and derivatives	NA	2-Keto-glutaramic acid
meta_191	191	144.046	TRUE	0.6425	41243.7	-0.000280296	C9H7NO	-H(-)	100	HMDB0029737	1H-Indole-3-carboxaldehyde	Organoheterocyclic compounds	Indoles and derivatives	Indoles	Aromatic heteropolycyclic compounds	Indoles	yes	1H-Indole-3-carboxaldehyde
meta_192	192	144.067	TRUE	0.359189	11602.2	-7.08e-05	C6H11NO3	-H(-)	100	HMDB0000730	Isobutyrylglycine	Organic acids and derivatives	Carboxylic acids and derivatives	Amino acids, peptides, and analogues	Aliphatic acyclic compounds	N-acyl-alpha amino acids	NA	Isobutyrylglycine
meta_193	193	144.086	TRUE	0.197668	11924.6	-0.000490895	C7H15NS	-H(-)	100	HMDB0040116	(±)-2-Butylthiazolidine	Organoheterocyclic compounds	Azolidines	Thiazolidines	Aliphatic heteromonocyclic compounds	Thiazolidines	NA	(±)-2-Butylthiazolidine
meta_194	194	145.014	TRUE	0.505573	5808.71	7.49e-05	C5H6O5	-H(-)	100	HMDB0000208	Oxoglutaric acid	Organic acids and derivatives	Keto acids and derivatives	Gamma-keto acids and derivatives	Aliphatic acyclic compounds	Gamma-keto acids and derivatives	NA	Oxoglutaric acid
meta_195	195	145.03	TRUE	0.428898	8571.55	-0.000381215	C9H6O2	-H(-)	100	HMDB0001218	Coumarin	Phenylpropanoids and polyketides	Coumarins and derivatives	Not classified	Aromatic heteropolycyclic compounds	Coumarins and derivatives	NA	Coumarin
meta_196	196	145.051	TRUE	0.462547	23363.8	-0.000295542	C6H10O4	-H(-)	100	HMDB0000422	2-Methylglutaric acid	Lipids and lipid-like molecules	Fatty Acyls	Fatty acids and conjugates	Aliphatic acyclic compounds	Methyl-branched fatty acids	NA	2-Methylglutaric acid
meta_197	197	145.062	TRUE	0.938434	565239	-0.000114815	C5H10N2O3	-H(-)	100	HMDB0000641	L-Glutamine	Organic acids and derivatives	Carboxylic acids and derivatives	Amino acids, peptides, and analogues	Aliphatic acyclic compounds	L-alpha-amino acids	yes	L-Glutamine
meta_198	198	145.098	TRUE	0.365203	224593	0.000559183	C6H14N2O2	-H(-)	100	HMDB0000182	L-Lysine	Organic acids and derivatives	Carboxylic acids and derivatives	Amino acids, peptides, and analogues	Aliphatic acyclic compounds	L-alpha-amino acids	yes	L-Lysine
meta_199	199	146.025	TRUE	0.114297	13708.8	-6.65e-05	C8H5NO2	-H(-)	100	HMDB0006779	Indole-5,6-quinone	Organoheterocyclic compounds	Indoles and derivatives	Not classified	Aromatic heteropolycyclic compounds	Indoles and derivatives	NA	Indole-5,6-quinone
meta_200	200	146.046	TRUE	0.834842	54736.4	1.35e-05	C5H9NO4	-H(-)	100	HMDB0000148	L-Glutamic acid	Organic acids and derivatives	Carboxylic acids and derivatives	Amino acids, peptides, and analogues	Aliphatic acyclic compounds	Glutamic acid and derivatives	NA	L-Glutamic acid
meta_201	201	146.082	TRUE	0.725201	19611.7	0.000497916	C6H13NO3	-H(-)	100	HMDB0029449	(2R,3R,4R)-2-Amino-4-hydroxy-3-methylpentanoic acid	Organic acids and derivatives	Carboxylic acids and derivatives	Amino acids, peptides, and analogues	Aliphatic acyclic compounds	Isoleucine and derivatives	NA	(2R,3R,4R)-2-Amino-4-hydroxy-3-methylpentanoic acid
meta_202	202	147.03	TRUE	0.756231	50919.4	-0.00047175	C5H8O5	-H(-)	100	HMDB0000426	Citramalic acid	Lipids and lipid-like molecules	Fatty Acyls	Fatty acids and conjugates	Aliphatic acyclic compounds	Hydroxy fatty acids	NA	Citramalic acid
meta_203	203	147.046	TRUE	0.755209	28766.2	-0.000430663	C9H8O2	-H(-)	100	HMDB0000567	Cinnamic acid	Phenylpropanoids and polyketides	Cinnamic acids and derivatives	Cinnamic acids	Aromatic homomonocyclic compounds	Cinnamic acids	NA	Cinnamic acid
meta_204	204	147.066	TRUE	0.593608	13428	0.000164224	C6H12O4	-H(-)	100	HMDB0000227	Mevalonic acid	Lipids and lipid-like molecules	Fatty Acyls	Fatty acids and conjugates	Aliphatic acyclic compounds	Hydroxy fatty acids	NA	Mevalonic acid
meta_205	205	147.082	TRUE	0.529283	8597.83	3.79e-05	C10H12O	-H(-)	100	HMDB0002214	Cuminaldehyde	Lipids and lipid-like molecules	Prenol lipids	Monoterpenoids	Aromatic homomonocyclic compounds	Aromatic monoterpenoids	NA	Cuminaldehyde
meta_206	206	147.094	TRUE	0.520779	3783.53	-0.000791667	C9H12N2	-H(-)	100	HMDB0001126	Nornicotine	Organoheterocyclic compounds	Pyridines and derivatives	Pyrrolidinylpyridines	Aromatic heteromonocyclic compounds	Pyrrolidinylpyridines	NA	Nornicotine
meta_207	207	148.042	TRUE	0.734053	22474.8	-0.00140634	C8H7NO2	-H(-)	52	HMDB0004058	5,6-Dihydroxyindole	Organoheterocyclic compounds	Indoles and derivatives	Hydroxyindoles	Aromatic heteropolycyclic compounds	Hydroxyindoles	NA	5,6-Dihydroxyindole
meta_208	208	148.053	TRUE	0.781493	7679	0.000843377	C6H12ClNO	-H(-)	25	HMDB0014796	Sevelamer	Not classified	Not classified	Epoxides	Not classified	Not classified	NA	Sevelamer
meta_209	209	148.076	TRUE	0.473511	4392.07	0.000364348	C9H11NO	-H(-)	100	HMDB0030175	Venoterpine	Organoheterocyclic compounds	Pyridines and derivatives	Not classified	Aromatic heteropolycyclic compounds	Pyridines and derivatives	NA	Venoterpine
meta_210	210	148.992	TRUE	0.53441	8996.77	-0.000104365	C4H6O4S	-H(-)	100	HMDB0042032	Thiodiacetic acid	Organic acids and derivatives	Carboxylic acids and derivatives	Dicarboxylic acids and derivatives	Aliphatic acyclic compounds	Thiodiacetic acid derivatives	NA	Thiodiacetic acid
meta_211	211	149.01	TRUE	0.699045	329792	-0.000748776	C4H6O6	-H(-)	100	HMDB0029878	D-Tartaric acid	Organic oxygen compounds	Organooxygen compounds	Carbohydrates and carbohydrate conjugates	Aliphatic acyclic compounds	Sugar acids and derivatives	NA	D-Tartaric acid
meta_212	212	149.046	TRUE	0.843066	34695.6	-0.0001269	C5H10O5	-H(-)	100	HMDB0000098	D-Xylose	Organic oxygen compounds	Organooxygen compounds	Carbohydrates and carbohydrate conjugates	Aliphatic heteromonocyclic compounds	Pentoses	NA	D-Xylose
meta_213	213	149.061	TRUE	0.737068	32437.8	3.52e-05	C9H10O2	-H(-)	100	HMDB0000764	Hydrocinnamic acid	Phenylpropanoids and polyketides	Phenylpropanoic acids	Not classified	Aromatic homomonocyclic compounds	Phenylpropanoic acids	yes	Hydrocinnamic acid
meta_214	214	149.097	TRUE	0.474825	11565.4	8.53e-05	C10H14O	-H(-)	100	HMDB0001878	Thymol	Lipids and lipid-like molecules	Prenol lipids	Monoterpenoids	Aromatic homomonocyclic compounds	Aromatic monoterpenoids	yes	Thymol
meta_215	215	149.108	TRUE	0.622523	3578.81	0.000742653	C9H14N2	-H(-)	100	HMDB0031841	2,5-Dimethyl-3-propylpyrazine	Organoheterocyclic compounds	Diazines	Pyrazines	Aromatic heteromonocyclic compounds	Pyrazines	NA	2,5-Dimethyl-3-propylpyrazine
meta_216	216	150.04	TRUE	0.428671	5062.43	0.000701995	C3H7N3O4	-H(-) [+2]	24	HMDB0029398	(3-Nitroamino)alanine	Organic acids and derivatives	Carboxylic acids and derivatives	Amino acids, peptides, and analogues	Aliphatic acyclic compounds	Alpha amino acids	NA	(3-Nitroamino)alanine
meta_217	217	150.056	TRUE	0.708346	44205.5	-8.57e-05	C8H9NO2	-H(-)	100	HMDB0001859	Acetaminophen	Benzenoids	Phenols	1-hydroxy-2-unsubstituted benzenoids	Aromatic homomonocyclic compounds	1-hydroxy-2-unsubstituted benzenoids	yes	Acetaminophen
meta_218	218	151.027	TRUE	0.749888	37102.2	-0.000669615	C5H4N4O2	-H(-)	100	HMDB0000292	Xanthine	Organoheterocyclic compounds	Imidazopyrimidines	Purines and purine derivatives	Aromatic heteropolycyclic compounds	Xanthines	yes	Xanthine
meta_219	219	151.04	TRUE	0.628971	46503	0.000259438	C8H8O3	-H(-)	100	HMDB0000020	p-Hydroxyphenylacetic acid	Benzenoids	Phenols	1-hydroxy-2-unsubstituted benzenoids	Aromatic homomonocyclic compounds	1-hydroxy-2-unsubstituted benzenoids	yes	p-Hydroxyphenylacetic acid
meta_220	220	151.06	TRUE	0.598706	11291.6	0.000794346	C5H12O5	-H(-)	100	HMDB0000508	Ribitol	Organic oxygen compounds	Organooxygen compounds	Carbohydrates and carbohydrate conjugates	Aliphatic acyclic compounds	Sugar alcohols	yes	Ribitol
meta_221	221	151.113	TRUE	0.433715	9367.89	-0.00015425	C10H16O	-H(-)	100	HMDB0003450	(-)-trans-Carveol	Lipids and lipid-like molecules	Prenol lipids	Monoterpenoids	Aliphatic homomonocyclic compounds	Menthane monoterpenoids	NA	(-)-trans-Carveol
meta_222	222	151.985	TRUE	0.0422495	3597.24	6.09e-06	C3H7NO2S2	-H(-)	100	HMDB0003585	Thiocysteine	Organic acids and derivatives	Carboxylic acids and derivatives	Amino acids, peptides, and analogues	Aliphatic acyclic compounds	Cysteine and derivatives	NA	Thiocysteine
meta_223	223	152.035	TRUE	0.0853758	10087.7	0.000165002	C7H7NO3	-H(-)	100	HMDB0001476	3-Hydroxyanthranilic acid	Benzenoids	Benzene and substituted derivatives	Benzoic acids and derivatives	Aromatic homomonocyclic compounds	Hydroxybenzoic acid derivatives	NA	3-Hydroxyanthranilic acid
meta_224	224	152.108	TRUE	0.386947	2951.6	0.000418105	C9H15NO	-H(-)	100	HMDB0034580	psi-Pelletierine	Organoheterocyclic compounds	Piperidines	Piperidinones	Aliphatic heteropolycyclic compounds	Piperidinones	NA	psi-Pelletierine
meta_225	225	153.019	TRUE	0.682755	81803.8	1.27e-05	C7H6O4	-H(-)	100	HMDB0000152	Gentisic acid	Benzenoids	Benzene and substituted derivatives	Benzoic acids and derivatives	Aromatic homomonocyclic compounds	Hydroxybenzoic acid derivatives	yes	Gentisic acid
meta_226	226	153.03	TRUE	0.431658	18660.9	0.000490625	C6H6N2O3	-H(-)	100	HMDB0062719	5-(2-carboxylatoethyl)-4-oxo-4,5-dihydro-1H-imidazol-5-ide	Organoheterocyclic compounds	Azoles	Imidazoles	Aromatic heteromonocyclic compounds	Imidazolyl carboxylic acids and derivatives	NA	5-(2-carboxylatoethyl)-4-oxo-4,5-dihydro-1H-imidazol-5-ide
meta_227	227	153.039	TRUE	0.0479849	9626.35	-0.00128175	C8H10OS	-H(-)	64	HMDB0032935	1-(2-Thienyl)-1-butanone	Organic oxygen compounds	Organooxygen compounds	Carbonyl compounds	Aromatic heteromonocyclic compounds	Aryl alkyl ketones	NA	1-(2-Thienyl)-1-butanone
meta_228	228	153.056	TRUE	-0.251735	12359.6	0.000118898	C8H10O3	-H(-)	100	HMDB0005784	Hydroxytyrosol	Benzenoids	Phenols	Tyrosols and derivatives	Aromatic homomonocyclic compounds	Tyrosols	NA	Hydroxytyrosol
meta_229	229	153.092	TRUE	0.0442347	7869.88	0.000474999	C9H14O2	-H(-)	100	HMDB0031302	Methyl 2-octynoate	Lipids and lipid-like molecules	Fatty Acyls	Fatty acid esters	Aliphatic acyclic compounds	Fatty acid esters	NA	Methyl 2-octynoate
meta_230	230	153.128	TRUE	0.436484	3261.05	0.000191192	C10H18O	-H(-)	100	HMDB0004043	Alpha-Terpineol	Lipids and lipid-like molecules	Prenol lipids	Monoterpenoids	Aliphatic homomonocyclic compounds	Menthane monoterpenoids	NA	Alpha-Terpineol
meta_231	231	154.062	TRUE	0.894657	363124	0.000384208	C6H9N3O2	-H(-)	100	HMDB0000177	L-Histidine	Organic acids and derivatives	Carboxylic acids and derivatives	Amino acids, peptides, and analogues	Aromatic heteromonocyclic compounds	Histidine and derivatives	yes	L-Histidine
meta_232	232	154.99	TRUE	0.844231	20821.9	0.00048638	C7H5ClO2	-H(-)	25	HMDB0001544	m-Chlorobenzoic acid	Benzenoids	Benzene and substituted derivatives	Benzoic acids and derivatives	Aromatic homomonocyclic compounds	Halobenzoic acids	NA	m-Chlorobenzoic acid
meta_233	233	154.998	TRUE	-0.234221	15596.1	0.000832321	C6H4O5	-H(-)	100	HMDB0004812	2,5-Furandicarboxylic acid	Organoheterocyclic compounds	Furans	Furoic acid and derivatives	Aromatic heteromonocyclic compounds	Furoic acids	NA	2,5-Furandicarboxylic acid
meta_234	234	155.035	TRUE	-0.227454	8614.48	0.000446707	C7H8O4	-H(-)	100	HMDB0029610	Ascladiol	Organoheterocyclic compounds	Dihydrofurans	Furanones	Aliphatic heteromonocyclic compounds	Butenolides	NA	Ascladiol
meta_235	235	155.046	TRUE	0.584787	15238.9	-4.11e-05	C6H8N2O3	-H(-)	100	HMDB0000544	5-Hydroxymethyl-4-methyluracil	Organoheterocyclic compounds	Diazines	Pyrimidines and pyrimidine derivatives	Aromatic heteromonocyclic compounds	Pyrimidones	NA	5-Hydroxymethyl-4-methyluracil
meta_236	236	155.107	TRUE	0.14995	8373.55	0.000671986	C9H16O2	-H(-)	100	HMDB0004362	4-Hydroxynonenal	Lipids and lipid-like molecules	Fatty Acyls	Fatty alcohols	Aliphatic acyclic compounds	Fatty alcohols	NA	4-Hydroxynonenal
meta_237	237	155.144	TRUE	0.443777	3086.47	0.000448847	C10H20O	-H(-)	100	HMDB0003352	Menthol	Lipids and lipid-like molecules	Prenol lipids	Monoterpenoids	Aliphatic homomonocyclic compounds	Menthane monoterpenoids	yes	Menthol
meta_238	238	156.103	TRUE	0.414488	4748.52	0.000481048	C8H15NO2	-H(-)	100	HMDB0014447	Tranexamic Acid	Organic acids and derivatives	Carboxylic acids and derivatives	Amino acids, peptides, and analogues	Aliphatic homomonocyclic compounds	Amino acids	NA	Tranexamic Acid
meta_239	239	157.05	TRUE	0.194862	7981.81	0.000372844	C7H10O4	-H(-)	100	HMDB0000635	Succinylacetone	Organic acids and derivatives	Keto acids and derivatives	Medium-chain keto acids and derivatives	Aliphatic acyclic compounds	Medium-chain keto acids and derivatives	NA	Succinylacetone
meta_240	240	157.062	TRUE	0.300959	11812.7	-0.000126514	C6H10N2O3	-H(-)	100	HMDB0031670	1-(Hydroxymethyl)-5,5-dimethyl-2,4-imidazolidinedione	Organoheterocyclic compounds	Azolidines	Imidazolidines	Aliphatic heteromonocyclic compounds	Hydantoins	NA	1-(Hydroxymethyl)-5,5-dimethyl-2,4-imidazolidinedione
meta_241	241	157.087	TRUE	0.245794	13769.9	0.000377014	C8H14O3	-H(-)	100	HMDB0000451	cis-4-Hydroxycyclohexylacetic acid	Organic oxygen compounds	Organooxygen compounds	Alcohols and polyols	Aliphatic homomonocyclic compounds	Cyclohexanols	NA	cis-4-Hydroxycyclohexylacetic acid
meta_242	242	157.123	TRUE	0.454522	21758.9	0.0004477	C9H18O2	-H(-)	100	HMDB0000798	Oenanthic ether	Lipids and lipid-like molecules	Fatty Acyls	Fatty acid esters	Aliphatic acyclic compounds	Fatty acid esters	NA	Oenanthic ether
meta_243	243	158.046	TRUE	0.325938	12051	0.000333369	C6H9NO4	-H(-)	100	HMDB0029433	L-2-Amino-4-methylenepentanedioic acid	Organic acids and derivatives	Carboxylic acids and derivatives	Amino acids, peptides, and analogues	Aliphatic acyclic compounds	Alpha amino acids	NA	L-2-Amino-4-methylenepentanedioic acid
meta_244	244	158.06	TRUE	0.38301	30397.3	0.000898804	C10H9NO	-H(-)	100	HMDB0001190	Indoleacetaldehyde	Organoheterocyclic compounds	Indoles and derivatives	Indoles	Aromatic heteropolycyclic compounds	3-alkylindoles	NA	Indoleacetaldehyde
meta_245	245	158.119	TRUE	0.411054	4962.76	0.000147604	C8H17NO2	-H(-)	100	HMDB0000991	DL-2-Aminooctanoic acid	Organic acids and derivatives	Carboxylic acids and derivatives	Amino acids, peptides, and analogues	Aliphatic acyclic compounds	Alpha amino acids	yes	DL-2-Aminooctanoic acid
meta_246	246	158.996	TRUE	0.34877	5724.28	-0.0017087	C6H8OS2	-H(-)	32	HMDB0036807	(2-Furanylmethyl) methyl disulfide	Organoheterocyclic compounds	Heteroaromatic compounds	Not classified	Aromatic heteromonocyclic compounds	Heteroaromatic compounds	NA	(2-Furanylmethyl) methyl disulfide
meta_247	247	159.012	TRUE	0.510523	3333.02	0.000245947	C6H8O3S	-H(-)	100	HMDB0035901	Thiacremonone	Organic oxygen compounds	Organooxygen compounds	Carbonyl compounds	Aliphatic heteromonocyclic compounds	Acyloins	NA	Thiacremonone
meta_248	248	159.027	TRUE	0.0874041	7225.01	0.00015838	C10H8S	-H(-)	100	HMDB0029689	2-Naphthalenethiol	Benzenoids	Naphthalenes	Not classified	Aromatic homopolycyclic compounds	Naphthalenes	NA	2-Naphthalenethiol
meta_249	249	159.041	TRUE	0.439501	7801.03	-0.000119312	C5H8N2O4	-H(-)	100	HMDB0030412	Tricholomic acid	Organic acids and derivatives	Carboxylic acids and derivatives	Amino acids, peptides, and analogues	Aliphatic heteromonocyclic compounds	Alpha amino acids	NA	Tricholomic acid
meta_250	250	159.078	TRUE	0.356958	9943	-5.37e-05	C6H12N2O3	-H(-)	100	HMDB0003459	D-Alanyl-D-alanine	Organic acids and derivatives	Carboxylic acids and derivatives	Amino acids, peptides, and analogues	Aliphatic acyclic compounds	Dipeptides	NA	D-Alanyl-D-alanine
meta_251	251	159.092	TRUE	0.405882	5214.22	0.000371208	C10H12N2	-H(-)	100	HMDB0000303	Tryptamine	Organoheterocyclic compounds	Indoles and derivatives	Tryptamines and derivatives	Aromatic heteropolycyclic compounds	Tryptamines and derivatives	yes	Tryptamine
meta_252	252	159.102	TRUE	0.395291	9436.49	0.000208036	C8H16O3	-H(-)	100	HMDB0000486	7-Hydroxyoctanoic acid	Organic acids and derivatives	Hydroxy acids and derivatives	Medium-chain hydroxy acids and derivatives	Aliphatic acyclic compounds	Medium-chain hydroxy acids and derivatives	NA	7-Hydroxyoctanoic acid
meta_253	253	159.113	TRUE	0.308	81142.5	0.00040947	C7H16N2O2	-H(-)	100	HMDB0002038	N(6)-Methyllysine	Organic acids and derivatives	Carboxylic acids and derivatives	Amino acids, peptides, and analogues	Aliphatic acyclic compounds	L-alpha-amino acids	NA	N(6)-Methyllysine
meta_254	254	160.025	TRUE	0.426492	4094.6	-0.000241077	C5H7NO5	-H(-)	100	HMDB0002273	4-Hydroxy-L-glutamic acid	Organic compounds	Organic acids and derivatives	Carboxylic acids and derivatives	Aliphatic acyclic compounds	Glutamic acid and derivatives	NA	4-Hydroxy-L-glutamic acid
meta_255	255	160.041	TRUE	0.511422	11562.9	-0.00083591	C9H7NO2	-H(-)	100	HMDB0002285	2-Indolecarboxylic acid	Organoheterocyclic compounds	Indoles and derivatives	Indolecarboxylic acids and derivatives	Aromatic heteropolycyclic compounds	Indolecarboxylic acids and derivatives	NA	2-Indolecarboxylic acid
meta_256	256	160.061	TRUE	0.580073	13022.5	0.000172742	C6H11NO4	-H(-)	100	HMDB0000510	Aminoadipic acid	Organic acids and derivatives	Carboxylic acids and derivatives	Amino acids, peptides, and analogues	Aliphatic acyclic compounds	Alpha amino acids	yes	Aminoadipic acid
meta_257	257	160.077	TRUE	0.439153	4952.23	0.000267686	C10H11NO	-H(-)	100	HMDB0003447	Tryptophanol	Organoheterocyclic compounds	Indoles and derivatives	Indoles	Aromatic heteropolycyclic compounds	3-alkylindoles	NA	Tryptophanol
meta_258	258	160.1	TRUE	0.245058	3008.92	0.000957156	C10H13N2	-H(-)	100	HMDB0001010	Nicotine imine	Alkaloids and derivatives	Not classified	Not classified	Aromatic heteromonocyclic compounds	Alkaloids and derivatives	NA	Nicotine imine
meta_259	259	161.022	TRUE	0.515008	25115.3	-0.000918175	C5H10N2S2	-H(-)	100	HMDB0038379	1-Piperazinecarbodithioic acid	Organoheterocyclic compounds	Diazinanes	Piperazines	Aliphatic heteromonocyclic compounds	Piperazines	NA	1-Piperazinecarbodithioic acid
meta_260	260	161.045	TRUE	0.659526	39544.4	0.000196543	C6H10O5	-H(-)	100	HMDB0000321	2-Hydroxyadipic acid	Lipids and lipid-like molecules	Fatty Acyls	Fatty acids and conjugates	Aliphatic acyclic compounds	Medium-chain fatty acids	yes	2-Hydroxyadipic acid
meta_261	261	161.058	TRUE	0.399642	9642.17	-0.00107621	C5H10N2O4	-H(-)	88	HMDB0028850	Glycyl-Serine	Organic acids and derivatives	Carboxylic acids and derivatives	Amino acids, peptides, and analogues	Aliphatic acyclic compounds	Dipeptides	NA	Glycyl-Serine
meta_262	262	161.095	TRUE	0.357136	5138.43	0.00196348	C11H14O	-H(-)	21	HMDB0031208	1-Phenyl-1-pentanone	Benzenoids	Benzene and substituted derivatives	Butyrophenones	Aromatic homomonocyclic compounds	Butyrophenones	NA	1-Phenyl-1-pentanone
meta_263	263	161.102	TRUE	0.665044	3390.21	-0.00125267	C8H18OS	-H(-)	67	HMDB0032380	(S1)-Methoxy-3-heptanethiol	Organooxygen compounds	Ethers	Dialkyl ethers	Aliphatic acyclic compounds	Dialkyl ethers	NA	(S1)-Methoxy-3-heptanethiol
meta_264	264	161.133	TRUE	0.656464	2425.43	0.000525898	C12H18	-H(-)	100	HMDB0013806	1,3-Diisopropylbenzene	Benzenoids	Benzene and substituted derivatives	Cumenes	Aromatic homomonocyclic compounds	Cumenes	NA	1,3-Diisopropylbenzene
meta_265	265	161.987	TRUE	0.809605	16383.1	-0.000286112	C4H5NO4S	-H(-)	100	HMDB0033585	Acesulfame	Organic acids and derivatives	Organic sulfuric acids and derivatives	Not classified	Aliphatic heteromonocyclic compounds	Organic sulfuric acids and derivatives	yes	Acesulfame
meta_266	266	162.056	TRUE	0.294259	9018.13	0.000291104	C9H9NO2	-H(-)	100	HMDB0001424	4-(3-Pyridyl)-3-butenoic acid	Organoheterocyclic compounds	Pyridines and derivatives	Not classified	Aromatic heteromonocyclic compounds	Pyridines and derivatives	NA	4-(3-Pyridyl)-3-butenoic acid
meta_267	267	162.092	TRUE	0.0739991	4772.74	9.57e-06	C10H13NO	-H(-)	100	HMDB0039661	2,3,6,7-Tetrahydro-7-methylcyclopent[b]azepin-8(1H)-one	Organoheterocyclic compounds	Azepines	Not classified	Aliphatic heteropolycyclic compounds	Azepines	NA	2,3,6,7-Tetrahydro-7-methylcyclopent[b]azepin-8(1H)-one
meta_268	268	163.002	TRUE	-0.126111	13783.3	0.00143584	C8H4O4	-H(-)	50	HMDB0061917	Terephthalate	Benzenoids	Benzene and substituted derivatives	Benzoic acids and derivatives	Aromatic homomonocyclic compounds	P-phthalic acid and derivatives	NA	Terephthalate
meta_269	269	163.04	TRUE	0.445902	27941.7	0.000125966	C9H8O3	-H(-)	100	HMDB0000205	Phenylpyruvic acid	Benzenoids	Benzene and substituted derivatives	Phenylpyruvic acid derivatives	Aromatic homomonocyclic compounds	Phenylpyruvic acid derivatives	NA	Phenylpyruvic acid
meta_270	270	163.061	TRUE	0.572406	206651	0.000559301	C6H12O5	-H(-)	100	HMDB0000174	L-Fucose	Organic oxygen compounds	Organooxygen compounds	Carbohydrates and carbohydrate conjugates	Aliphatic heteromonocyclic compounds	Hexoses	NA	L-Fucose
meta_271	271	163.076	TRUE	0.754025	28537.3	0.000660043	C10H12O2	-H(-)	100	HMDB0000543	Benzenebutanoic acid	Benzenoids	Benzene and substituted derivatives	Not classified	Aromatic homomonocyclic compounds	Benzene and substituted derivatives	NA	Benzenebutanoic acid
meta_272	272	163.112	TRUE	0.338682	13292.5	0.000471063	C11H16O	-H(-)	100	HMDB0029653	1-(1-Methoxy-1-methylethyl)-4-methylbenzene	Benzenoids	Benzene and substituted derivatives	Phenylpropanes	Aromatic homomonocyclic compounds	Phenylpropanes	NA	1-(1-Methoxy-1-methylethyl)-4-methylbenzene
meta_273	273	164.071	TRUE	0.931802	293404	0.000255859	C9H11NO2	-H(-)	100	HMDB0000159	L-Phenylalanine	Organic acids and derivatives	Carboxylic acids and derivatives	Amino acids, peptides, and analogues	Aromatic homomonocyclic compounds	Phenylalanine and derivatives	NA	L-Phenylalanine
meta_274	274	165.041	TRUE	0.705434	445505	-0.00013426	C5H10O6	-H(-)	100	HMDB0000539	Arabinonic acid	Organic oxygen compounds	Organooxygen compounds	Carbohydrates and carbohydrate conjugates	Aliphatic acyclic compounds	Sugar acids and derivatives	NA	Arabinonic acid
meta_275	275	165.055	TRUE	0.704891	50152.5	0.000246659	C9H10O3	-H(-)	100	HMDB0000375	3-(3-Hydroxyphenyl)propanoic acid	Phenylpropanoids and polyketides	Phenylpropanoic acids	Not classified	Aromatic homomonocyclic compounds	Phenylpropanoic acids	yes	3-(3-Hydroxyphenyl)propanoic acid
meta_276	276	165.075	TRUE	0.824971	42574.6	-0.00089296	C10H14S	-H(-)	100	HMDB0038183	3-(4-Methyl-3-pentenyl)thiophene	Organoheterocyclic compounds	Heteroaromatic compounds	Not classified	Aromatic heteromonocyclic compounds	Heteroaromatic compounds	NA	3-(4-Methyl-3-pentenyl)thiophene
meta_277	277	165.09	TRUE	0.693465	23350.8	-0.00100107	C6H10N6	-H(-)	100	HMDB0029862	Cyromazine	Organoheterocyclic compounds	Triazines	Aminotriazines	Aromatic heteromonocyclic compounds	N-aliphatic s-triazines	NA	Cyromazine
meta_278	278	166.014	TRUE	0.736213	31436.5	0.000267614	C7H5NO4	-H(-)	100	HMDB0000232	Quinolinic acid	Organoheterocyclic compounds	Pyridines and derivatives	Pyridinecarboxylic acids and derivatives	Aromatic heteromonocyclic compounds	Pyridinecarboxylic acids	yes	Quinolinic acid
meta_279	279	166.027	TRUE	0.714834	11958.9	0.00185671	C3H9N3O3S	-H(-)	25	HMDB0003584	Taurocyamine	Organic acids and derivatives	Organic sulfonic acids and derivatives	Organosulfonic acids and derivatives	Aliphatic acyclic compounds	Organosulfonic acids	NA	Taurocyamine
meta_280	280	166.123	TRUE	0.727364	7643.79	0.000872382	C10H17NO	-H(-)	100	HMDB0030371	Myrtine	Organoheterocyclic compounds	Quinolizines	Not classified	Aliphatic heteropolycyclic compounds	Quinolizines	NA	Myrtine
meta_281	281	166.975	TRUE	-0.493717	12231.5	0.000342538	C3H5O6P	-H(-)	100	HMDB0000263	Phosphoenolpyruvic acid	Organic acids and derivatives	Organic phosphoric acids and derivatives	Phosphate esters	Aliphatic acyclic compounds	Phosphate esters	NA	Phosphoenolpyruvic acid
meta_282	282	167.021	TRUE	0.878166	2.80518e+06	-0.000375731	C5H4N4O3	-H(-)	100	HMDB0000289	Uric acid	Organoheterocyclic compounds	Imidazopyrimidines	Purines and purine derivatives	Aromatic heteropolycyclic compounds	Xanthines	yes	Uric acid
meta_283	283	167.999	TRUE	-0.352229	11426.9	-0.00133445	C3H7NO5S	-H(-)	58	HMDB0002757	Cysteic acid	Organic acids and derivatives	Carboxylic acids and derivatives	Amino acids, peptides, and analogues	Aliphatic acyclic compounds	Alpha amino acids	yes	Cysteic acid
meta_284	284	168.077	TRUE	0.752653	37939.8	0.00055681	C7H11N3O2	-H(-)	100	HMDB0000001	1-Methylhistidine	Organic acids and derivatives	Carboxylic acids and derivatives	Amino acids, peptides, and analogues	Aromatic heteromonocyclic compounds	Histidine and derivatives	NA	1-Methylhistidine
meta_285	285	168.103	TRUE	0.592033	8429.49	0.00031136	C9H15NO2	-H(-)	100	HMDB0038321	Homoarecoline	Alkaloids and derivatives	Not classified	Not classified	Aliphatic heteromonocyclic compounds	Alkaloids and derivatives	NA	Homoarecoline
meta_286	286	169.015	TRUE	0.707204	42035.2	-0.000155028	C8H10S2	-H(-)	100	HMDB0040590	Benzyl methyl disulfide	Benzenoids	Benzene and substituted derivatives	Not classified	Aromatic homomonocyclic compounds	Benzene and substituted derivatives	NA	Benzyl methyl disulfide
meta_287	287	169.033	TRUE	0.492241	69716.1	-0.000104474	C8H10O2S	-H(-)	100	HMDB0032234	2,5-Dimethyl-3-furanthiol acetate	Organoheterocyclic compounds	Heteroaromatic compounds	Not classified	Aromatic heteromonocyclic compounds	Heteroaromatic compounds	NA	2,5-Dimethyl-3-furanthiol acetate
meta_288	288	169.05	TRUE	-0.0358958	16324.9	0.000542892	C8H10O4	-H(-)	100	HMDB0000318	3,4-Dihydroxyphenylglycol	Benzenoids	Phenols	Benzenediols	Aromatic homomonocyclic compounds	Catechols	NA	3,4-Dihydroxyphenylglycol
meta_289	289	169.066	TRUE	0.612179	34254.4	8.68e-06	C12H10O	-H(-)	100	HMDB0032412	Methyl beta-naphthyl ketone	Benzenoids	Naphthalenes	Not classified	Aromatic homopolycyclic compounds	Naphthalenes	NA	Methyl beta-naphthyl ketone
meta_290	290	169.098	TRUE	0.439597	6078.86	0.000435848	C8H14N2O2	-H(-)	100	HMDB0015333	Levetiracetam	Organic acids and derivatives	Carboxylic acids and derivatives	Amino acids, peptides, and analogues	Aliphatic heteromonocyclic compounds	Alpha amino acids and derivatives	NA	Levetiracetam
meta_291	291	169.123	TRUE	0.603574	16242.2	0.000629544	C10H18O2	-H(-)	100	HMDB0004980	cis-4-Decenoic acid	Nucleosides, nucleotides, and analogues	Purine nucleotides	Purine nucleotide sugars	Aromatic heteropolycyclic compounds	Purine nucleotide sugars	NA	cis-4-Decenoic acid
meta_292	292	169.16	TRUE	0.877752	3989.6	-6.66e-05	C11H22O	-H(-)	100	HMDB0030941	Undecanal	Organic oxygen compounds	Organooxygen compounds	Carbonyl compounds	Aliphatic acyclic compounds	Medium-chain aldehydes	NA	Undecanal
meta_293	293	170.028	TRUE	0.369526	21408.8	-0.000115116	C7H9NO2S	-H(-)	100	HMDB0032420	2-(4-Methyl-5-thiazolyl)ethyl formate	Organoheterocyclic compounds	Azoles	Thiazoles	Aromatic heteromonocyclic compounds	4,5-disubstituted thiazoles	NA	2-(4-Methyl-5-thiazolyl)ethyl formate
meta_294	294	170.101	TRUE	0.427936	3711.09	0.000199444	C9H17NS	-H(-)	100	HMDB0037159	2,5-Dihydro-4,5-dimethyl-2-(2-methylpropyl)thiazole	Organoheterocyclic compounds	Azolines	Thiazolines	Aliphatic heteromonocyclic compounds	Thiazolines	NA	2,5-Dihydro-4,5-dimethyl-2-(2-methylpropyl)thiazole
meta_295	295	170.945	TRUE	0.396107	13399.3	0.000566345	C6H5BrO	-H(-)	25	HMDB0032059	2-Bromophenol	Benzenoids	Phenols	Halophenols	Aromatic homomonocyclic compounds	O-bromophenols	NA	2-Bromophenol
meta_296	296	171.045	TRUE	0.551112	12713.4	0.000384218	C11H8O2	-H(-)	100	HMDB0001892	Menadione	Benzenoids	Naphthalenes	Naphthoquinones	Aromatic homopolycyclic compounds	Naphthoquinones	NA	Menadione
meta_297	297	171.055	TRUE	0.498392	5997.52	0.00119456	C10H8N2O	-H(-)	73	HMDB0037296	3-Acetyl-2,7-naphthyridine	Organoheterocyclic compounds	Naphthyridines	Not classified	Aromatic heteropolycyclic compounds	Naphthyridines	NA	3-Acetyl-2,7-naphthyridine
meta_298	298	171.077	TRUE	0.30197	43936.7	0.000431047	C7H12N2O3	-H(-)	100	HMDB0000721	Glycylproline	Organic acids and derivatives	Carboxylic acids and derivatives	Amino acids, peptides, and analogues	Aliphatic heteromonocyclic compounds	Dipeptides	NA	Glycylproline
meta_299	299	171.102	TRUE	-0.298299	18422.5	0.000644719	C9H16O3	-H(-)	100	HMDB0036188	Tetrahydrofurfuryl butyrate	Lipids and lipid-like molecules	Fatty Acyls	Fatty acid esters	Aliphatic heteromonocyclic compounds	Fatty acid esters	NA	Tetrahydrofurfuryl butyrate
meta_300	300	171.139	TRUE	0.525103	33768.1	0.000372537	C10H20O2	-H(-)	100	HMDB0000511	Capric acid	Lipids and lipid-like molecules	Fatty Acyls	Fatty acids and conjugates	Aliphatic acyclic compounds	Medium-chain fatty acids	yes	Capric acid
meta_301	301	172.061	TRUE	-0.0333304	8440.42	0.000477772	C7H11NO4	-H(-)	100	HMDB0006488	N-Acetyl-L-glutamate 5-semialdehyde	Organic acids and derivatives	Carboxylic acids and derivatives	Amino acids, peptides, and analogues	Aliphatic acyclic compounds	N-acyl-L-alpha-amino acids	NA	N-Acetyl-L-glutamate 5-semialdehyde
meta_302	302	172.098	TRUE	0.479537	9866.08	-1.58e-05	C8H15NO3	-H(-)	100	HMDB0000701	Hexanoylglycine	Organic acids and derivatives	Carboxylic acids and derivatives	Amino acids, peptides, and analogues	Aliphatic acyclic compounds	N-acyl-alpha amino acids	NA	Hexanoylglycine
meta_303	303	172.899	TRUE	0.030925	2801	0.000968115	C2H6S2Se	-H(-)	25	HMDB0030876	Bis(methylthio) selenide	Organosulfur compounds	Thioselenides	Not classified	Aliphatic acyclic compounds	Thioselenides	NA	Bis(methylthio) selenide
meta_304	304	172.991	TRUE	0.774579	644950	1.92e-06	C6H6O4S	-H(-)	100	HMDB0060015	Phenol sulphate	Organic acids and derivatives	Organic sulfuric acids and derivatives	Arylsulfates	Aromatic homomonocyclic compounds	Phenylsulfates	yes	Phenol sulphate
meta_305	305	173.081	TRUE	0.174655	14644.7	0.000778723	C8H14O4	-H(-)	100	HMDB0000893	Suberic acid	Lipids and lipid-like molecules	Fatty Acyls	Fatty acids and conjugates	Aliphatic acyclic compounds	Medium-chain fatty acids	NA	Suberic acid
meta_306	306	173.093	TRUE	0.610869	35093.4	0.00031891	C7H14N2O3	-H(-)	100	HMDB0003357	N-Acetylornithine	Organic acids and derivatives	Carboxylic acids and derivatives	Amino acids, peptides, and analogues	Aliphatic acyclic compounds	N-acyl-L-alpha-amino acids	NA	N-Acetylornithine
meta_307	307	173.104	TRUE	0.41348	92092.3	0.000275749	C6H14N4O2	-H(-)	100	HMDB0000517	L-Arginine	Organic acids and derivatives	Carboxylic acids and derivatives	Amino acids, peptides, and analogues	Aliphatic acyclic compounds	L-alpha-amino acids	yes	L-Arginine
meta_308	308	173.118	TRUE	0.478461	11221.8	0.000721892	C9H18O3	-H(-)	100	HMDB0031513	(±)-3-Hydroxynonanoic acid	Organic acids and derivatives	Hydroxy acids and derivatives	Medium-chain hydroxy acids and derivatives	Aliphatic acyclic compounds	Medium-chain hydroxy acids and derivatives	NA	(±)-3-Hydroxynonanoic acid
meta_309	309	173.129	TRUE	0.47396	10177.1	0.00103003	C8H18N2O2	-H(-)	95	HMDB0013287	Ne,Ne dimethyllysine	Organic acids and derivatives	Carboxylic acids and derivatives	Amino acids, peptides, and analogues	Aliphatic acyclic compounds	Alpha amino acids	NA	Ne,Ne dimethyllysine
meta_310	310	173.142	TRUE	0.579693	5932.37	-5.89e-05	C9H20NO2	-H(-)	100	HMDB0013223	Butyrylcholine	Organic nitrogen compounds	Organonitrogen compounds	Quaternary ammonium salts	Aliphatic acyclic compounds	Acyl cholines	NA	Butyrylcholine
meta_311	311	173.156	TRUE	0.534426	4763.3	-0.000871121	C10H22O2	-H(-)	100	HMDB0030083	(±)-Hydroxycitronellol	Lipids and lipid-like molecules	Fatty Acyls	Fatty alcohols	Aliphatic acyclic compounds	Fatty alcohols	NA	(±)-Hydroxycitronellol
meta_312	312	174.076	TRUE	0.534964	5937.57	0.000903422	C7H13NO4	-H(-)	100	HMDB0002201	N-Carboxyethyl-g-aminobutyric acid	Organic acids and derivatives	Carboxylic acids and derivatives	Amino acids, peptides, and analogues	Aliphatic acyclic compounds	Gamma amino acids and derivatives	yes	N-Carboxyethyl-g-aminobutyric acid
meta_313	313	174.088	TRUE	0.757148	22963.7	0.000327105	C6H13N3O3	-H(-)	100	HMDB0000904	Citrulline	Organic acids and derivatives	Carboxylic acids and derivatives	Amino acids, peptides, and analogues	Aliphatic acyclic compounds	L-alpha-amino acids	yes	Citrulline
meta_314	314	175.024	TRUE	0.642236	14291.5	0.000438384	C6H8O6	-H(-)	100	HMDB0000044	Ascorbic acid	Organoheterocyclic compounds	Dihydrofurans	Furanones	Aliphatic heteromonocyclic compounds	Butenolides	yes	Ascorbic acid
meta_315	315	175.061	TRUE	0.376597	8753.84	0.000519938	C7H12O5	-H(-)	100	HMDB0000402	2-Isopropylmalic acid	Lipids and lipid-like molecules	Fatty Acyls	Fatty acids and conjugates	Aliphatic acyclic compounds	Hydroxy fatty acids	NA	2-Isopropylmalic acid
meta_316	316	175.076	TRUE	0.501736	14110.1	0.000584675	C11H12O2	-H(-)	100	HMDB0029699	Cinnamyl acetate	Benzenoids	Benzene and substituted derivatives	Styrenes	Aromatic homomonocyclic compounds	Styrenes	NA	Cinnamyl acetate
meta_317	317	175.112	TRUE	0.290215	4840.23	0.00079841	C12H16O	-H(-)	100	HMDB0031569	4-Methyl-1-phenyl-2-pentanone	Benzenoids	Benzene and substituted derivatives	Not classified	Aromatic homomonocyclic compounds	Benzene and substituted derivatives	NA	4-Methyl-1-phenyl-2-pentanone
meta_318	318	175.125	TRUE	0.751903	2705.9	-0.00109886	C11H16N2	-H(-)	85	HMDB0036175	(Cyclohexylmethyl)pyrazine	Organoheterocyclic compounds	Diazines	Pyrazines	Aromatic heteromonocyclic compounds	Pyrazines	NA	(Cyclohexylmethyl)pyrazine
meta_319	319	176.071	TRUE	0.470546	7688.08	0.000237077	C10H11NO2	-H(-)	100	HMDB0001855	5-Hydroxytryptophol	Organoheterocyclic compounds	Indoles and derivatives	Hydroxyindoles	Aromatic heteropolycyclic compounds	Hydroxyindoles	NA	5-Hydroxytryptophol
meta_320	320	176.093	TRUE	0.347059	3347.1	-4.51e-05	C7H15NO4	-H(-)	100	HMDB0035360	N-Methyl-1-deoxynojirimycin	Organoheterocyclic compounds	Piperidines	Not classified	Aliphatic heteromonocyclic compounds	Piperidines	NA	N-Methyl-1-deoxynojirimycin
meta_321	321	176.107	TRUE	0.00647212	4023.54	0.000720514	C11H15NO	-H(-)	100	HMDB0014968	Phenmetrazine	Organoheterocyclic compounds	Oxazinanes	Morpholines	Aromatic heteromonocyclic compounds	Phenylmorpholines	NA	Phenmetrazine
meta_322	322	177.02	TRUE	0.629001	18422.5	-0.000472327	C9H6O4	-H(-)	100	HMDB0030819	Aesculetin	Phenylpropanoids and polyketides	Coumarins and derivatives	Hydroxycoumarins	Aromatic heteropolycyclic compounds	6,7-dihydroxycoumarins	NA	Aesculetin
meta_323	323	177.034	TRUE	0.57268	10146.5	0.000419265	C5H10N2O3S	-H(-)	100	HMDB0000078	Cysteinylglycine	Organic acids and derivatives	Carboxylic acids and derivatives	Amino acids, peptides, and analogues	Aliphatic acyclic compounds	Dipeptides	NA	Cysteinylglycine
meta_324	324	177.039	TRUE	0.556356	10570	0.00119549	C6H10O6	-H(-)	73	HMDB0000150	Gluconolactone	Organic oxygen compounds	Organooxygen compounds	Carbohydrates and carbohydrate conjugates	Aliphatic heteromonocyclic compounds	Gluconolactones	NA	Gluconolactone
meta_325	325	177.056	TRUE	0.561676	15923.8	0.000129382	C10H10O3	-H(-)	100	HMDB0002040	4-Methoxycinnamic acid	Phenylpropanoids and polyketides	Cinnamic acids and derivatives	Cinnamic acids	Aromatic homomonocyclic compounds	Cinnamic acids	NA	4-Methoxycinnamic acid
meta_326	326	177.077	TRUE	0.379312	5370.46	0.000154288	C7H14O5	-H(-)	100	HMDB0033789	2-O-Methyl-L-fucose	Organic oxygen compounds	Organooxygen compounds	Carbohydrates and carbohydrate conjugates	Aliphatic heteromonocyclic compounds	Hexoses	NA	2-O-Methyl-L-fucose
meta_327	327	177.091	TRUE	0.108426	9025.35	0.001017	C11H14O2	-H(-)	97	HMDB0002043	5-Phenylvaleric acid	Lipids and lipid-like molecules	Fatty Acyls	Fatty acids and conjugates	Aromatic homomonocyclic compounds	Medium-chain fatty acids	NA	5-Phenylvaleric acid
meta_328	328	177.128	TRUE	0.299835	4766.43	0.000503019	C12H18O	-H(-)	100	HMDB0014956	Propofol	Benzenoids	Benzene and substituted derivatives	Cumenes	Aromatic homomonocyclic compounds	Cumenes	NA	Propofol
meta_329	329	178.033	TRUE	0.571878	6401.13	-7.43e-05	C9H9NOS	-H(-)	100	HMDB0032581	1-(Isothiocyanatomethyl)-4-methoxybenzene	Benzenoids	Benzene and substituted derivatives	Phenylmethylamines	Aromatic homomonocyclic compounds	Phenylmethylamines	NA	1-(Isothiocyanatomethyl)-4-methoxybenzene
meta_330	330	178.051	TRUE	0.856028	282725	8.74e-05	C9H9NO3	-H(-)	100	HMDB0000714	Hippuric acid	Benzenoids	Benzene and substituted derivatives	Benzoic acids and derivatives	Aromatic homomonocyclic compounds	Hippuric acids	yes	Hippuric acid
meta_331	331	178.088	TRUE	-0.378727	20586.6	-0.000410456	C10H13NO2	-H(-)	100	HMDB0001189	2(N)-Methyl-norsalsolinol	Organoheterocyclic compounds	Tetrahydroisoquinolines	Not classified	Aromatic heteropolycyclic compounds	Tetrahydroisoquinolines	NA	2(N)-Methyl-norsalsolinol
meta_332	332	179.035	TRUE	-0.24355	21573.9	0.000142483	C9H8O4	-H(-)	100	HMDB0000707	4-Hydroxyphenylpyruvic acid	Benzenoids	Benzene and substituted derivatives	Phenylpyruvic acid derivatives	Aromatic homomonocyclic compounds	Phenylpyruvic acid derivatives	yes	4-Hydroxyphenylpyruvic acid
meta_333	333	179.057	TRUE	0.938872	381216	-0.000715545	C6H12O6	-H(-)	100	HMDB0000122	D-Glucose	Organic oxygen compounds	Organooxygen compounds	Carbohydrates and carbohydrate conjugates	Aliphatic heteromonocyclic compounds	Hexoses	NA	D-Glucose
meta_334	334	179.143	TRUE	0.528917	8424.61	0.00087326	C12H20O	-H(-)	100	HMDB0031181	Homodihydrojasmone	Organic oxygen compounds	Organooxygen compounds	Carbonyl compounds	Aliphatic homomonocyclic compounds	Cyclic ketones	NA	Homodihydrojasmone
meta_335	335	181.037	TRUE	0.85079	97277.1	2.83e-05	C6H6N4O3	-H(-)	100	HMDB0001970	3-Methyluric acid	Organoheterocyclic compounds	Imidazopyrimidines	Purines and purine derivatives	Aromatic heteropolycyclic compounds	Xanthines	NA	3-Methyluric acid
meta_336	336	181.05	TRUE	0.78194	47803.8	0.000777125	C9H10O4	-H(-)	100	HMDB0000118	Homovanillic acid	Benzenoids	Phenols	Methoxyphenols	Aromatic homomonocyclic compounds	Methoxyphenols	NA	Homovanillic acid
meta_337	337	181.086	TRUE	0.420345	13219.6	0.000807333	C10H14O3	-H(-)	100	HMDB0029456	Amyl 2-furoate	Organoheterocyclic compounds	Furans	Furoic acid derivatives	Aromatic heteromonocyclic compounds	Furoic acid derivatives	NA	Amyl 2-furoate
meta_338	338	181.123	TRUE	0.368375	7050.44	0.000840602	C11H18O2	-H(-)	100	HMDB0030006	2,2,7,7-Tetramethyl-1,6-dioxaspiro[4.4]non-3-ene	Organoheterocyclic compounds	Oxolanes	Not classified	Aliphatic heteropolycyclic compounds	Oxolanes	NA	2,2,7,7-Tetramethyl-1,6-dioxaspiro[4.4]non-3-ene
meta_339	339	181.159	TRUE	0.459267	4571.13	0.000412571	C12H22O	-H(-)	100	HMDB0031020	2-Dodecenal	Organic oxygen compounds	Organooxygen compounds	Carbonyl compounds	Aliphatic acyclic compounds	Medium-chain aldehydes	NA	2-Dodecenal
meta_340	340	181.992	TRUE	0.641141	16512.1	0.000180476	C7H5NO3S	-H(-)	100	HMDB0029723	Saccharin	Organoheterocyclic compounds	Benzothiazoles	Not classified	Aromatic heteropolycyclic compounds	Benzothiazoles	yes	Saccharin
meta_341	341	182.045	TRUE	0.787846	41087.5	0.000381564	C8H9NO4	-H(-)	100	HMDB0000017	4-Pyridoxic acid	Organoheterocyclic compounds	Pyridines and derivatives	Pyridinecarboxylic acids and derivatives	Aromatic heteromonocyclic compounds	Pyridinecarboxylic acids	yes	4-Pyridoxic acid
meta_342	342	182.081	TRUE	0.304358	6970.6	0.00125592	C9H13NO3	-H(-)	66	HMDB0000068	Epinephrine	Benzenoids	Phenols	Benzenediols	Aromatic homomonocyclic compounds	Catechols	NA	Epinephrine
meta_343	343	183.031	TRUE	0.381343	13042.8	-0.00083594	C8H8O5	-H(-)	100	HMDB0001866	3,4-Dihydroxymandelic acid	Benzenoids	Phenols	Benzenediols	Aromatic homomonocyclic compounds	Catechols	NA	3,4-Dihydroxymandelic acid
meta_344	344	183.05	TRUE	0.623672	13212.7	-0.00142203	C9H12O2S	-H(-)	51	HMDB0032401	(+/-)-3-[(2-methyl-3-furyl)thio]-2-butanone	Organosulfur compounds	Thioethers	Alkylarylthioethers	Aromatic heteromonocyclic compounds	Alkylarylthioethers	NA	(+/-)-3-[(2-methyl-3-furyl)thio]-2-butanone
meta_345	345	183.067	TRUE	0.190092	9374.58	-0.000780722	C5H15NO4P	-H(-)	100	HMDB0001565	Phosphorylcholine	Organic nitrogen compounds	Organonitrogen compounds	Quaternary ammonium salts	Aliphatic acyclic compounds	Phosphocholines	NA	Phosphorylcholine
meta_346	346	183.102	TRUE	0.222269	10417.9	0.000379996	C10H16O3	-H(-)	100	HMDB0036117	(1'R)-Nepetalic acid	Lipids and lipid-like molecules	Prenol lipids	Monoterpenoids	Aliphatic homomonocyclic compounds	Monocyclic monoterpenoids	NA	(1'R)-Nepetalic acid
meta_347	347	183.138	TRUE	0.587523	18215.7	0.000636096	C11H20O2	-H(-)	100	HMDB0031062	(Z)-3-Methyl-3-decenoic acid	Lipids and lipid-like molecules	Fatty Acyls	Fatty acids and conjugates	Aliphatic acyclic compounds	Medium-chain fatty acids	NA	(Z)-3-Methyl-3-decenoic acid
meta_348	348	184.076	TRUE	0.33413	4238.21	0.000752649	C12H11NO	-H(-)	100	HMDB0032597	4-Hydroxydiphenylamine	Benzenoids	Benzene and substituted derivatives	Phenols and derivatives	Aromatic homomonocyclic compounds	Aminophenols	NA	4-Hydroxydiphenylamine
meta_349	349	184.098	TRUE	0.674449	19289.3	0.000285911	C9H15NO3	-H(-)	100	HMDB0006348	Pseudoecgonine	Alkaloids and derivatives	Tropane alkaloids	Not classified	Aliphatic heteropolycyclic compounds	Tropane alkaloids	NA	Pseudoecgonine
meta_350	350	185.008	TRUE	0.589581	10225.8	0.000880926	C7H6O6	-H(-)	100	HMDB0060371	3-Fumarylpyruvate	Organic acids and derivatives	Keto acids and derivatives	Medium-chain keto acids and derivatives	Aliphatic acyclic compounds	Medium-chain keto acids and derivatives	NA	3-Fumarylpyruvate
meta_351	351	185.045	TRUE	0.0240103	19243	0.000431584	C8H10O5	-H(-)	100	HMDB0041026	Erinapyrone C	Organoheterocyclic compounds	Pyrans	Pyranones and derivatives	Aliphatic heteropolycyclic compounds	Dihydropyranones	NA	Erinapyrone C
meta_352	352	185.061	TRUE	0.378527	16667.2	0.000283849	C12H10O2	-H(-)	100	HMDB0032708	1-Naphthaleneacetic acid	Benzenoids	Naphthalenes	Not classified	Aromatic homopolycyclic compounds	Naphthalenes	NA	1-Naphthaleneacetic acid
meta_353	353	185.118	TRUE	0.438896	18735.5	6.95e-05	C10H18O3	-H(-)	100	HMDB0010724	3-Oxodecanoic acid	Organic acids and derivatives	Keto acids and derivatives	Medium-chain keto acids and derivatives	Aliphatic acyclic compounds	Medium-chain keto acids and derivatives	NA	3-Oxodecanoic acid
meta_354	354	187.008	TRUE	0.83933	4.06137e+06	-0.000583572	C7H8O4S	-H(-)	100	HMDB0011635	p-Cresol sulfate	Organic acids and derivatives	Organic sulfuric acids and derivatives	Arylsulfates	Aromatic homomonocyclic compounds	Phenylsulfates	yes	p-Cresol sulfate
meta_355	355	187.077	TRUE	0.854406	247049	-0.000434096	C12H12O2	-H(-)	100	HMDB0029495	Trigoforin	Phenylpropanoids and polyketides	Coumarins and derivatives	Not classified	Aromatic heteropolycyclic compounds	Coumarins and derivatives	NA	Trigoforin
meta_356	356	187.133	TRUE	0.778202	27805.5	0.000650673	C10H20O3	-H(-)	100	HMDB0002203	3-Hydroxycapric acid	Organic acids and derivatives	Hydroxy acids and derivatives	Medium-chain hydroxy acids and derivatives	Aliphatic acyclic compounds	Medium-chain hydroxy acids and derivatives	yes	3-Hydroxycapric acid
meta_357	357	188.072	TRUE	0.80942	39302.7	8.09e-06	C11H11NO2	-H(-)	100	HMDB0002302	Indole-3-propionic acid	Organoheterocyclic compounds	Indoles and derivatives	Indolyl carboxylic acids and derivatives	Aromatic heteropolycyclic compounds	Indolyl carboxylic acids and derivatives	yes	Indole-3-propionic acid
meta_358	358	188.986	TRUE	0.728403	804369	-0.000130247	C6H6O5S	-H(-)	100	HMDB0059724	Pyrocatechol sulfate	Organic acids and derivatives	Organic sulfuric acids and derivatives	Arylsulfates	Aromatic homomonocyclic compounds	Phenylsulfates	NA	Pyrocatechol sulfate
meta_359	359	189.04	TRUE	0.798924	98275.6	0.000374488	C7H10O6	-H(-)	100	HMDB0012710	3-Dehydroquinate	Organooxygen compounds	Alcohols and polyols	Cyclic alcohols and derivatives	Aliphatic homomonocyclic compounds	Cyclitols and derivatives	NA	3-Dehydroquinate
meta_360	360	189.088	TRUE	0.585539	21952.2	-0.000303497	C7H14N2O4	-H(-)	100	HMDB0001370	Diaminopimelic acid	Organic acids and derivatives	Carboxylic acids and derivatives	Amino acids, peptides, and analogues	Aliphatic acyclic compounds	L-alpha-amino acids	NA	Diaminopimelic acid
meta_361	361	190.014	TRUE	0.42343	19911.6	-0.00216023	C6H7O7	-H(-)	15	HMDB0062803	2,3-diketogulonate	Organic oxygen compounds	Organooxygen compounds	Carbohydrates and carbohydrate conjugates	Aliphatic acyclic compounds	Sugar acids and derivatives	NA	2,3-diketogulonate
meta_362	362	190.037	TRUE	0.784492	59005.1	-0.000924312	C6H9NO6	-H(-)	100	HMDB0015155	Isosorbide Mononitrate	Organoheterocyclic compounds	Furofurans	Isosorbides	Aliphatic heteropolycyclic compounds	Isosorbides	NA	Isosorbide Mononitrate
meta_363	363	190.125	TRUE	0.578513	5263.34	-0.000845517	C12H17NO	-H(-)	100	HMDB0015519	Phendimetrazine	Organoheterocyclic compounds	Oxazinanes	Morpholines	Aromatic heteromonocyclic compounds	Phenylmorpholines	NA	Phendimetrazine
meta_364	364	191.02	TRUE	0.618046	1.22123e+06	-0.000401104	C6H8O7	-H(-)	100	HMDB0000094	Citric acid	Organic acids and derivatives	Carboxylic acids and derivatives	Tricarboxylic acids and derivatives	Aliphatic acyclic compounds	Tricarboxylic acids and derivatives	yes	Citric acid
meta_365	365	191.056	TRUE	0.755109	154083	0.000189631	C7H12O6	-H(-)	100	HMDB0003072	Quinic acid	Organic oxygen compounds	Organooxygen compounds	Alcohols and polyols	Aliphatic homomonocyclic compounds	Quinic acids and derivatives	yes	Quinic acid
meta_366	366	191.107	TRUE	0.631406	20592.6	0.000466383	C12H16O2	-H(-)	100	HMDB0031571	2-Methyl-1-phenyl-2-propanyl acetate	Benzenoids	Benzene and substituted derivatives	Phenylpropanes	Aromatic homomonocyclic compounds	Phenylpropanes	NA	2-Methyl-1-phenyl-2-propanyl acetate
meta_367	367	191.12	TRUE	0.661638	7517.57	-0.00092769	C11H16N2O	-H(-)	100	HMDB0015189	Tocainide	Benzenoids	Benzene and substituted derivatives	Xylenes	Aromatic homomonocyclic compounds	m-Xylenes	NA	Tocainide
meta_368	368	192.103	TRUE	0.0733833	6960.53	0.000321938	C11H15NO2	-H(-)	100	HMDB0003626	(R)-N-Methylsalsolinol	Organoheterocyclic compounds	Tetrahydroisoquinolines	Not classified	Aromatic heteropolycyclic compounds	Tetrahydroisoquinolines	NA	(R)-N-Methylsalsolinol
meta_369	369	193.036	TRUE	0.570574	25569.6	-0.000740423	C6H10O7	-H(-)	100	HMDB0000127	D-Glucuronic acid	Organic oxygen compounds	Organooxygen compounds	Carbohydrates and carbohydrate conjugates	Aliphatic heteromonocyclic compounds	Glucuronic acid derivatives	yes	D-Glucuronic acid
meta_370	370	193.05	TRUE	-0.418621	26109.5	0.000489171	C10H10O4	-H(-)	100	HMDB0000954	trans-Ferulic acid	Phenylpropanoids and polyketides	Cinnamic acids and derivatives	Hydroxycinnamic acids and derivatives	Aromatic homomonocyclic compounds	Hydroxycinnamic acids	NA	trans-Ferulic acid
meta_371	371	193.072	TRUE	0.163167	11521.4	0.000260115	C7H14O6	-H(-)	100	HMDB0029915	D-4-O-Methyl-myo-inositol	Organic oxygen compounds	Organooxygen compounds	Alcohols and polyols	Aliphatic homomonocyclic compounds	Cyclohexanols	NA	D-4-O-Methyl-myo-inositol
meta_372	372	193.16	TRUE	0.0964369	5159.16	-0.000265169	C13H22O	-H(-)	100	HMDB0031846	Geranylacetone	Lipids and lipid-like molecules	Prenol lipids	Monoterpenoids	Aliphatic acyclic compounds	Acyclic monoterpenoids	NA	Geranylacetone
meta_373	373	194.046	TRUE	0.676977	35448.2	0.000362696	C9H9NO4	-H(-)	100	HMDB0000840	Salicyluric acid	Benzenoids	Benzene and substituted derivatives	Benzoic acids and derivatives	Aromatic homomonocyclic compounds	Hippuric acids	yes	Salicyluric acid
meta_374	374	195.018	TRUE	0.257766	10565.4	-0.000403044	C8H6NO5	-H(-)	100	HMDB0062403	4-hydroxy-3-nitrophenylacetate	Organic compounds	Benzenoids	Phenols	Aromatic homomonocyclic compounds	Nitrophenols	NA	4-hydroxy-3-nitrophenylacetate
meta_375	375	195.033	TRUE	-0.210126	20903.3	0.0011709	C7H16S3	-H(-)	76	HMDB0033044	1-(Methylthio)propyl propyl disulfide	Organosulfur compounds	Organic disulfides	Dialkyldisulfides	Aliphatic acyclic compounds	Dialkyldisulfides	NA	1-(Methylthio)propyl propyl disulfide
meta_376	376	195.052	TRUE	0.857477	295254	-6.45e-05	C7H8N4O3	-H(-)	100	HMDB0001857	1,3-Dimethyluric acid	Organoheterocyclic compounds	Imidazopyrimidines	Purines and purine derivatives	Aromatic heteropolycyclic compounds	Xanthines	yes	1,3-Dimethyluric acid
meta_377	377	195.102	TRUE	0.775892	42285.5	0.000425713	C11H16O3	-H(-)	100	HMDB0036226	2,6-Dimethoxy-4-propylphenol	Benzenoids	Phenols	Methoxyphenols	Aromatic homomonocyclic compounds	Methoxyphenols	NA	2,6-Dimethoxy-4-propylphenol
meta_378	378	195.138	TRUE	-0.478558	24910.6	0.000692995	C12H20O2	-H(-)	100	HMDB0030867	Dihydro-5-(2-octenyl)-2(3H)-furanone	Organoheterocyclic compounds	Lactones	Gamma butyrolactones	Aliphatic heteromonocyclic compounds	Gamma butyrolactones	NA	Dihydro-5-(2-octenyl)-2(3H)-furanone
meta_379	379	195.175	TRUE	0.453748	5004.71	0.000443156	C13H24O	-H(-)	100	HMDB0032247	(Z)-4-Dodecenal	Lipids and lipid-like molecules	Fatty Acyls	Fatty aldehydes	Aliphatic acyclic compounds	Fatty aldehydes	NA	(Z)-4-Dodecenal
meta_380	380	197.068	TRUE	0.870774	198373	0.000207196	C7H10N4O3	-H(-)	100	HMDB0004400	5-Acetylamino-6-amino-3-methyluracil	Organic nitrogen compounds	Organonitrogen compounds	N-arylamides	Aromatic heteromonocyclic compounds	N-acetylarylamines	yes	5-Acetylamino-6-amino-3-methyluracil
meta_381	381	197.154	TRUE	0.580064	19438.1	0.000320693	C12H22O2	-H(-)	100	HMDB0000529	5Z-Dodecenoic acid	Lipids and lipid-like molecules	Fatty Acyls	Fatty acids and conjugates	Aliphatic acyclic compounds	Medium-chain fatty acids	yes	5Z-Dodecenoic acid
meta_382	382	198.105	TRUE	0.64916	3470.01	-0.000999165	C12H13N3	-H(-)	100	HMDB0033135	Pyrimethanil	Benzenoids	Benzene and substituted derivatives	Aniline and substituted anilines	Aromatic heteromonocyclic compounds	Aniline and substituted anilines	NA	Pyrimethanil
meta_383	383	199.007	TRUE	0.747568	93299.1	-0.000182942	C8H8O4S	-H(-)	100	HMDB0062775	4-Vinylphenol sulfate	Organic acids and derivatives	Organic sulfuric acids and derivatives	Arylsulfates	Aromatic homomonocyclic compounds	Phenylsulfates	NA	4-Vinylphenol sulfate
meta_384	384	199.018	TRUE	0.595605	23616.8	-0.00092287	C9H9ClO3	-H(-)	25	HMDB0040932	4-Chloro-3,5-dimethoxybenzaldehyde	Benzenoids	Benzene and substituted derivatives	Methoxybenzenes	Aromatic homomonocyclic compounds	Dimethoxybenzenes	NA	4-Chloro-3,5-dimethoxybenzaldehyde
meta_385	385	199.037	TRUE	0.73182	21965.3	0.000377821	C7H13KO4	-H(-)	25	HMDB0037192	Potassium 2-(1-ethoxy) ethoxypropanoate	Organic acids and derivatives	Carboxylic acids and derivatives	Carboxylic acid derivatives	Not classified	Carboxylic acid salts	NA	Potassium 2-(1-ethoxy) ethoxypropanoate
meta_386	386	199.061	TRUE	0.546166	11890	-2.91e-05	C9H12O5	-H(-)	100	HMDB0033091	(Z)-3-(1-Formyl-1-propenyl)pentanedioic acid	Lipids and lipid-like molecules	Fatty Acyls	Fatty acids and conjugates	Aliphatic acyclic compounds	Medium-chain fatty acids	NA	(Z)-3-(1-Formyl-1-propenyl)pentanedioic acid
meta_387	387	199.076	TRUE	-0.393957	34052.3	0.000464474	C13H12O2	-H(-)	100	HMDB0014738	Monobenzone	Benzenoids	Phenols	4-alkoxyphenols	Aromatic homomonocyclic compounds	4-alkoxyphenols	NA	Monobenzone
meta_388	388	199.097	TRUE	-0.0849082	11860.4	0.000572047	C10H16O4	-H(-)	100	HMDB0000603	cis-4-Decenedioic acid	Lipids and lipid-like molecules	Fatty Acyls	Fatty acids and conjugates	Aliphatic acyclic compounds	Medium-chain fatty acids	NA	cis-4-Decenedioic acid
meta_389	389	199.133	TRUE	-0.000304138	8905.11	0.000803876	C11H20O3	-H(-)	100	HMDB0032662	(S)-9-Hydroxy-10-undecenoic acid	Organic acids and derivatives	Hydroxy acids and derivatives	Medium-chain hydroxy acids and derivatives	Aliphatic acyclic compounds	Medium-chain hydroxy acids and derivatives	NA	(S)-9-Hydroxy-10-undecenoic acid
meta_390	390	199.17	TRUE	0.874528	88065.5	0.000529998	C12H24O2	-H(-)	100	HMDB0000638	Dodecanoic acid	Lipids and lipid-like molecules	Fatty Acyls	Fatty acids and conjugates	Aliphatic acyclic compounds	Medium-chain fatty acids	yes	Dodecanoic acid
meta_391	391	200.105	TRUE	0.381023	3970.71	-0.00127255	C8H15N3O3	-H(-)	64	HMDB0240212	(alpha-keto-dimethyl-delta-N,N-Dimethylguanidynol) valeric acid	Organic acids and derivatives	Keto acids and derivatives	Short-chain keto acids and derivatives	Aliphatic acyclic compounds	Short-chain keto acids and derivatives	NA	(alpha-keto-dimethyl-delta-N,N-Dimethylguanidynol) valeric acid
meta_392	392	200.129	TRUE	0.409251	5772.68	0.000693862	C10H19NO3	-H(-)	100	HMDB0000832	Capryloylglycine	Organic acids and derivatives	Carboxylic acids and derivatives	Amino acids, peptides, and analogues	Aliphatic acyclic compounds	N-acyl-alpha amino acids	NA	Capryloylglycine
meta_393	393	201.023	TRUE	0.751126	43389.2	6.45e-05	C8H10O4S	-H(-)	100	HMDB0062551	4-ethylphenylsulfate	Organic acids and derivatives	Organic sulfuric acids and derivatives	Arylsulfates	Aromatic homomonocyclic compounds	Phenylsulfates	NA	4-ethylphenylsulfate
meta_394	394	201.076	TRUE	0.498854	10824.2	0.000525603	C9H14O5	-H(-)	100	HMDB0032306	Diethyl oxalpropionate	Organic acids and derivatives	Keto acids and derivatives	Beta-keto acids and derivatives	Aliphatic acyclic compounds	Beta-keto acids and derivatives	NA	Diethyl oxalpropionate
meta_395	395	201.092	TRUE	0.487997	14470.7	0.000586265	C13H14O2	-H(-)	100	HMDB0030816	6-Acetyl-2,2-dimethyl-2H-1-benzopyran	Organoheterocyclic compounds	Benzopyrans	1-benzopyrans	Aromatic heteropolycyclic compounds	2,2-dimethyl-1-benzopyrans	NA	6-Acetyl-2,2-dimethyl-2H-1-benzopyran
meta_396	396	201.113	TRUE	0.286718	11736.4	0.000499996	C10H18O4	-H(-)	100	HMDB0000792	Sebacic acid	Lipids and lipid-like molecules	Fatty Acyls	Fatty acids and conjugates	Aliphatic acyclic compounds	Medium-chain fatty acids	yes	Sebacic acid
meta_397	397	201.124	TRUE	0.50179	8486.42	0.000487747	C9H18N2O3	-H(-)	100	HMDB0028690	Alanyl-Isoleucine	Organic acids and derivatives	Carboxylic acids and derivatives	Amino acids, peptides, and analogues	Aliphatic acyclic compounds	Dipeptides	NA	Alanyl-Isoleucine
meta_398	398	201.134	TRUE	0.381153	6428.84	0.00177826	C8H18N4O2	-H(-)	29	HMDB0001539	Asymmetric dimethylarginine	Organic acids and derivatives	Carboxylic acids and derivatives	Amino acids, peptides, and analogues	Aliphatic acyclic compounds	Arginine and derivatives	yes	Asymmetric dimethylarginine
meta_399	399	201.149	TRUE	0.304631	5230.3	0.000958094	C11H22O3	-H(-)	100	HMDB0032443	3-Hydroxynonyl acetate	Lipids and lipid-like molecules	Fatty Acyls	Fatty alcohol esters	Aliphatic acyclic compounds	Fatty alcohol esters	NA	3-Hydroxynonyl acetate
meta_400	400	202.119	TRUE	0.486791	6557.43	0.000429164	C8H17N3O3	-H(-)	100	HMDB0028846	Glycyl-Lysine	Organic acids and derivatives	Carboxylic acids and derivatives	Amino acids, peptides, and analogues	Aliphatic acyclic compounds	Dipeptides	NA	Glycyl-Lysine
meta_401	401	203.002	TRUE	0.772322	391169	-0.000261733	C7H8O5S	-H(-)	100	HMDB0060013	O-methoxycatechol-O-sulphate	Organic acids and derivatives	Organic sulfuric acids and derivatives	Arylsulfates	Aromatic homomonocyclic compounds	Phenylsulfates	yes	O-methoxycatechol-O-sulphate
meta_402	402	203.02	TRUE	0.711608	93232.5	-0.000516023	C7H8O7	-H(-)	100	HMDB0031665	Daucic acid	Organic acids and derivatives	Hydroxy acids and derivatives	Beta hydroxy acids and derivatives	Aliphatic heteromonocyclic compounds	Beta hydroxy acids and derivatives	NA	Daucic acid
meta_403	403	203.057	TRUE	0.783617	45899.5	-0.00049771	C8H12O6	-H(-)	100	HMDB0041031	3,5,6-Trihydroxy-5-(hydroxymethyl)-2-methoxy-2-cyclohexen-1-one	Organic oxygen compounds	Organooxygen compounds	Carbonyl compounds	Aliphatic homomonocyclic compounds	Cyclohexenones	NA	3,5,6-Trihydroxy-5-(hydroxymethyl)-2-methoxy-2-cyclohexen-1-one
meta_404	404	203.063	TRUE	0.484317	29099.7	-0.00126646	C14H8N2	-H(-)	65	HMDB0030182	Eupolauridine	Organoheterocyclic compounds	Diazanaphthalenes	Naphthyridines	Aromatic heteropolycyclic compounds	Naphthyridines	NA	Eupolauridine
meta_405	405	203.082	TRUE	0.877464	301213	0.000555213	C11H12N2O2	-H(-)	100	HMDB0000929	L-Tryptophan	Organoheterocyclic compounds	Indoles and derivatives	Indolyl carboxylic acids and derivatives	Aromatic heteropolycyclic compounds	Indolyl carboxylic acids and derivatives	yes	L-Tryptophan
meta_406	406	203.104	TRUE	0.463739	104000	2.6e-05	C8H16N2O4	-H(-)	100	HMDB0029052	Serylvaline	Organic acids and derivatives	Carboxylic acids and derivatives	Amino acids, peptides, and analogues	Aliphatic acyclic compounds	Dipeptides	NA	Serylvaline
meta_407	407	203.177	TRUE	0.564911	5635.83	-6.98e-05	C10H24N2O2	-H(-)	100	HMDB0014474	Ethambutol	Organic nitrogen compounds	Organonitrogen compounds	Amines	Aliphatic acyclic compounds	1,2-aminoalcohols	NA	Ethambutol
meta_408	408	204.066	TRUE	0.863709	42969.2	0.000442392	C11H11NO3	-H(-)	100	HMDB0000671	Indolelactic acid	Organoheterocyclic compounds	Indoles and derivatives	Indolyl carboxylic acids and derivatives	Aromatic heteropolycyclic compounds	Indolyl carboxylic acids and derivatives	yes	Indolelactic acid
meta_409	409	204.124	TRUE	0.0275992	6825.15	0.00018446	C9H19NO4	-H(-)	100	HMDB0004231	Pantothenol	Lipids and lipid-like molecules	Fatty Acyls	Fatty amides	Aliphatic acyclic compounds	N-acyl amines	NA	Pantothenol
meta_410	410	204.139	TRUE	0.516826	4538.85	0.000367529	C13H19NO	-H(-)	100	HMDB0015072	Diethylpropion	Organic oxygen compounds	Organooxygen compounds	Carbonyl compounds	Aromatic homomonocyclic compounds	Alkyl-phenylketones	NA	Diethylpropion
meta_411	411	204.148	TRUE	0.317218	3798	-0.000124367	C9H21N2O3	-H(-)	100	HMDB0001422	3-Hydroxy-N6,N6,N6-trimethyl-L-lysine	Organic acids and derivatives	Carboxylic acids and derivatives	Amino acids, peptides, and analogues	Aliphatic acyclic compounds	L-alpha-amino acids	NA	3-Hydroxy-N6,N6,N6-trimethyl-L-lysine
meta_412	412	204.982	TRUE	0.683713	174291	-0.000433676	C6H6O6S	-H(-)	100	HMDB0059752	5-Sulfoxymethylfurfural	Organic oxygen compounds	Organooxygen compounds	Carbonyl compounds	Aromatic heteromonocyclic compounds	Aryl-aldehydes	NA	5-Sulfoxymethylfurfural
meta_413	413	205.036	TRUE	0.635317	19464.2	-0.000692053	C7H10O7	-H(-)	100	HMDB0000379	2-Methylcitric acid	Organic acids and derivatives	Carboxylic acids and derivatives	Tricarboxylic acids and derivatives	Aliphatic acyclic compounds	Tricarboxylic acids and derivatives	NA	2-Methylcitric acid
meta_414	414	205.071	TRUE	0.668768	12534	0.000934292	C8H14O6	-H(-)	100	HMDB0033584	Diethyl tartrate	Organic acids and derivatives	Hydroxy acids and derivatives	Beta hydroxy acids and derivatives	Aliphatic acyclic compounds	Beta hydroxy acids and derivatives	NA	Diethyl tartrate
meta_415	415	205.086	TRUE	0.576879	12862.2	0.000794417	C12H14O3	-H(-)	100	HMDB0030762	Ethyl trans-p-methoxycinnamate	Phenylpropanoids and polyketides	Cinnamic acids and derivatives	Cinnamic acid esters	Aromatic homomonocyclic compounds	Cinnamic acid esters	NA	Ethyl trans-p-methoxycinnamate
meta_416	416	205.123	TRUE	0.0276546	9433.9	0.000255151	C13H18O2	-H(-)	100	HMDB0001925	Ibuprofen	Phenylpropanoids and polyketides	Phenylpropanoic acids	Not classified	Aromatic homomonocyclic compounds	Phenylpropanoic acids	NA	Ibuprofen
meta_417	417	205.159	TRUE	0.777402	57330	0.000893711	C14H22O	-H(-)	100	HMDB0013825	4-(1,1,3,3-Tetramethylbutyl)-phenol	Benzenoids	Benzene and substituted derivatives	Phenylpropanes	Aromatic homomonocyclic compounds	Phenylpropanes	NA	4-(1,1,3,3-Tetramethylbutyl)-phenol
meta_418	418	206.058	TRUE	0.766159	21261.5	-0.000956066	C9H9N3O3	-H(-)	100	HMDB0060664	Isoniazid pyruvate	Organoheterocyclic compounds	Pyridines and derivatives	Pyridinecarboxylic acids and derivatives	Aromatic heteromonocyclic compounds	Pyridinecarboxylic acids and derivatives	NA	Isoniazid pyruvate
meta_419	419	206.082	TRUE	0.36143	10889.8	0.000531135	C11H13NO3	-H(-)	100	HMDB0000512	N-Acetyl-L-phenylalanine	Organic acids and derivatives	Carboxylic acids and derivatives	Amino acids, peptides, and analogues	Aromatic homomonocyclic compounds	Phenylalanine and derivatives	yes	N-Acetyl-L-phenylalanine
meta_420	420	207.03	TRUE	0.233778	11556.7	0.000362401	C10H8O5	-H(-)	100	HMDB0129376	3-(2H-1,3-benzodioxol-5-yl)-3-oxopropanoic acid	Organoheterocyclic compounds	Benzodioxoles	Not classified	Aromatic heteropolycyclic compounds	Benzodioxoles	NA	3-(2H-1,3-benzodioxol-5-yl)-3-oxopropanoic acid
meta_421	421	207.066	TRUE	0.363925	23035.2	0.000508128	C11H12O4	-H(-)	100	HMDB0012127	(R)-2-Benzylsuccinate	Phenylpropanoids and polyketides	Phenylpropanoic acids	Not classified	Aromatic homomonocyclic compounds	Phenylpropanoic acids	NA	(R)-2-Benzylsuccinate
meta_422	422	207.087	TRUE	0.455816	17688.7	0.000382927	C8H16O6	-H(-)	100	HMDB0029968	Ethyl beta-D-glucopyranoside	Organic oxygen compounds	Organooxygen compounds	Carbohydrates and carbohydrate conjugates	Aliphatic heteromonocyclic compounds	O-glycosyl compounds	NA	Ethyl beta-D-glucopyranoside
meta_423	423	207.113	TRUE	0.508518	4965.87	0.000530824	C11H16N2O2	-H(-)	100	HMDB0015217	Pilocarpine	Alkaloids and derivatives	Not classified	Not classified	Aromatic heteromonocyclic compounds	Alkaloids and derivatives	NA	Pilocarpine
meta_424	424	207.138	TRUE	0.0829849	11086.3	0.000757689	C13H20O2	-H(-)	100	HMDB0029668	Eremopetasinorol	Organooxygen compounds	Alcohols and polyols	Cyclic alcohols and derivatives	Aliphatic homopolycyclic compounds	Cyclic alcohols and derivatives	NA	Eremopetasinorol
meta_425	425	208.076	TRUE	0.49249	6408.55	0.000810717	C14H11NO	-H(-)	100	HMDB0032757	3-Methyl-9H-carbazole-9-carboxaldehyde	Organoheterocyclic compounds	Indoles and derivatives	Carbazoles	Aromatic heteropolycyclic compounds	N-acylcarbazoles	NA	3-Methyl-9H-carbazole-9-carboxaldehyde
meta_426	426	208.958	TRUE	0.659716	3700.7	0.000905453	C6H10S4	-H(-)	100	HMDB0033202	Di-2-propenyl tetrasulfide	Organosulfur compounds	Sulfenyl compounds	Not classified	Aliphatic acyclic compounds	Sulfenyl compounds	NA	Di-2-propenyl tetrasulfide
meta_427	427	209.067	TRUE	0.750979	37405.3	-0.00068758	C7H14O7	-H(-)	100	HMDB0003219	Sedoheptulose	Organic oxygen compounds	Organooxygen compounds	Carbohydrates and carbohydrate conjugates	Aliphatic acyclic compounds	Heptoses	NA	Sedoheptulose
meta_428	428	209.082	TRUE	0.704341	47089.6	0.000359979	C11H14O4	-H(-)	100	HMDB0013070	Sinapyl alcohol	Benzenoids	Phenols	Methoxyphenols	Aromatic homomonocyclic compounds	Methoxyphenols	NA	Sinapyl alcohol
meta_429	429	209.093	TRUE	0.672709	12809	0.000224068	C10H14N2O3	-H(-)	100	HMDB0015441	Aprobarbital	Organoheterocyclic compounds	Diazines	Pyrimidines and pyrimidine derivatives	Aliphatic heteromonocyclic compounds	Barbituric acid derivatives	NA	Aprobarbital
meta_430	430	209.108	TRUE	0.772049	8225.24	0.000187789	C14H14N2	-H(-)	100	HMDB0015656	Naphazoline	Benzenoids	Naphthalenes	Not classified	Aromatic heteropolycyclic compounds	Naphthalenes	NA	Naphazoline
meta_431	431	209.12	TRUE	0.358717	11439.1	-0.00135424	C12H18O3	-H(-)	57	HMDB0032797	Jasmonic acid	Lipids and lipid-like molecules	Fatty Acyls	Lineolic acids and derivatives	Aliphatic homomonocyclic compounds	Jasmonic acids	NA	Jasmonic acid
meta_432	432	209.129	TRUE	0.625693	7608.41	0.000722106	C11H18N2O2	-H(-)	100	HMDB0034276	L,L-Cyclo(leucylprolyl)	Organic acids and derivatives	Carboxylic acids and derivatives	Amino acids, peptides, and analogues	Aliphatic heteropolycyclic compounds	Alpha amino acids and derivatives	NA	L,L-Cyclo(leucylprolyl)
meta_433	433	209.155	TRUE	0.00953052	10556.5	0.000111159	C13H22O2	-H(-)	100	HMDB0030425	Linalyl propionate	Lipids and lipid-like molecules	Prenol lipids	Monoterpenoids	Aliphatic acyclic compounds	Acyclic monoterpenoids	NA	Linalyl propionate
meta_434	434	209.191	TRUE	0.400903	4191.39	0.00037571	C14H26O	-H(-)	100	HMDB0032525	Tetradec-2-enal	Lipids and lipid-like molecules	Fatty Acyls	Fatty aldehydes	Aliphatic acyclic compounds	Fatty aldehydes	NA	Tetradec-2-enal
meta_435	435	210.132	TRUE	0.718292	3186.54	7.96e-05	C12H21NS	-H(-)	100	HMDB0040092	2-Heptyl-4,5-dimethylthiazole	Organoheterocyclic compounds	Azoles	Thiazoles	Aromatic heteromonocyclic compounds	2,4,5-trisubstituted thiazoles	NA	2-Heptyl-4,5-dimethylthiazole
meta_436	436	211.024	TRUE	0.655101	81295.3	0.000364222	C9H8O6	-H(-)	100	HMDB0125210	2-oxo-3-(3,4,5-trihydroxyphenyl)propanoic acid	Benzenoids	Benzene and substituted derivatives	Phenylpyruvic acid derivatives	Aromatic homomonocyclic compounds	Phenylpyruvic acid derivatives	NA	2-oxo-3-(3,4,5-trihydroxyphenyl)propanoic acid
meta_437	437	211.039	TRUE	0.543137	13256.6	0.00058226	C13H8O3	-H(-)	100	HMDB0013696	Urolithin B	Phenylpropanoids and polyketides	Coumarins and derivatives	Not classified	Aromatic heteropolycyclic compounds	Coumarins and derivatives	NA	Urolithin B
meta_438	438	211.084	TRUE	0.854759	38258.7	-0.000157713	C8H12N4O3	-H(-)	100	HMDB0028843	Glycyl-Histidine	Organic acids and derivatives	Carboxylic acids and derivatives	Amino acids, peptides, and analogues	Aromatic heteromonocyclic compounds	Dipeptides	NA	Glycyl-Histidine
meta_439	439	211.097	TRUE	0.705344	27757.6	0.000712132	C11H16O4	-H(-)	100	HMDB0059744	3,4-Methyleneazelaic acid	Lipids and lipid-like molecules	Fatty Acyls	Fatty acids and conjugates	Aliphatic acyclic compounds	Medium-chain fatty acids	NA	3,4-Methyleneazelaic acid
meta_440	440	211.11	TRUE	0.641926	7787.11	-0.000913947	C10H16N2O3	-H(-)	100	HMDB0011180	L-prolyl-L-proline	Organic acids and derivatives	Carboxylic acids and derivatives	Amino acids, peptides, and analogues	Aliphatic heteromonocyclic compounds	Dipeptides	NA	L-prolyl-L-proline
meta_441	441	211.133	TRUE	0.0463225	15569.2	0.00075751	C12H20O3	-H(-)	100	HMDB0029388	Cucurbic acid	Lipids and lipid-like molecules	Fatty Acyls	Lineolic acids and derivatives	Aliphatic homomonocyclic compounds	Jasmonic acids	NA	Cucurbic acid
meta_442	442	211.15	TRUE	0.524164	4103.88	-0.000911986	C16H20	-H(-)	100	HMDB0059902	2,6-Diisopropylnaphthalene	Benzenoids	Naphthalenes	Not classified	Aromatic homopolycyclic compounds	Naphthalenes	NA	2,6-Diisopropylnaphthalene
meta_443	443	211.17	TRUE	0.478136	9598.92	0.000671448	C13H24O2	-H(-)	100	HMDB0031017	10-Undecenyl acetate	Lipids and lipid-like molecules	Fatty Acyls	Fatty alcohol esters	Aliphatic acyclic compounds	Fatty alcohol esters	NA	10-Undecenyl acetate
meta_444	444	212.002	TRUE	0.880979	234449	0.000438514	C8H7NO4S	-H(-)	100	HMDB0000682	Indoxyl sulfate	Organic acids and derivatives	Organic sulfuric acids and derivatives	Arylsulfates	Aromatic heteropolycyclic compounds	Arylsulfates	NA	Indoxyl sulfate
meta_445	445	212.127	TRUE	0.423123	5201.7	0.00229257	C11H19NO3	-H(-)	12	HMDB0094807	2-nonenoylglycine	Organic acids and derivatives	Carboxylic acids and derivatives	Amino acids, peptides, and analogues	Aliphatic acyclic compounds	Alpha amino acids	NA	2-nonenoylglycine
meta_446	446	213.022	TRUE	0.795198	196428	0.000535527	C9H10O4S	-H(-)	100	HMDB0135284	{[(2E)-3-phenylprop-2-en-1-yl]oxy}sulfonic acid	Benzenoids	Benzene and substituted derivatives	Styrenes	Aromatic homomonocyclic compounds	Styrenes	NA	{[(2E)-3-phenylprop-2-en-1-yl]oxy}sulfonic acid
meta_447	447	213.113	TRUE	0.260068	14045.6	0.000350084	C11H18O4	-H(-)	100	HMDB0030984	5-Hexyltetrahydro-2-oxo-3-furancarboxylic acid	Organoheterocyclic compounds	Lactones	Gamma butyrolactones	Aliphatic heteromonocyclic compounds	Gamma butyrolactones	NA	5-Hexyltetrahydro-2-oxo-3-furancarboxylic acid
meta_448	448	213.127	TRUE	0.530241	6223.8	-0.00207325	C10H18N2O3	-H(-)	18	HMDB0003581	Dethiobiotin	Lipids and lipid-like molecules	Fatty Acyls	Fatty acids and conjugates	Aliphatic heteromonocyclic compounds	Medium-chain fatty acids	NA	Dethiobiotin
meta_449	449	213.149	TRUE	0.365349	12342.5	0.000885308	C12H22O3	-H(-)	100	HMDB0010727	3-Oxododecanoic acid	Organic acids and derivatives	Keto acids and derivatives	Medium-chain keto acids and derivatives	Aliphatic acyclic compounds	Medium-chain keto acids and derivatives	NA	3-Oxododecanoic acid
meta_450	450	213.185	TRUE	0.37207	9270.16	0.00105275	C13H26O2	-H(-)	92	HMDB0000910	Tridecanoic acid	Lipids and lipid-like molecules	Fatty Acyls	Fatty acids and conjugates	Aliphatic acyclic compounds	Long-chain fatty acids	NA	Tridecanoic acid
meta_451	451	214.109	TRUE	0.538457	6698.79	-0.000298748	C10H17NO4	-H(-)	100	HMDB0013124	Propenoylcarnitine	Organic acids and derivatives	Hydroxy acids and derivatives	Beta hydroxy acids and derivatives	Aliphatic acyclic compounds	Beta hydroxy acids and derivatives	NA	Propenoylcarnitine
meta_452	452	214.145	TRUE	0.588982	7588.92	0.000173907	C11H21NO3	-H(-)	100	HMDB0013279	N-Nonanoylglycine	Organic acids and derivatives	Carboxylic acids and derivatives	Amino acids, peptides, and analogues	Aliphatic acyclic compounds	N-acyl-alpha amino acids	NA	N-Nonanoylglycine
meta_453	453	215.002	TRUE	0.743466	52384.5	0.000328077	C8H8O5S	-H(-)	100	HMDB0124978	(5-ethenyl-2-hydroxyphenyl)oxidanesulfonic acid	Organic acids and derivatives	Organic sulfuric acids and derivatives	Arylsulfates	Aromatic homomonocyclic compounds	Phenylsulfates	NA	(5-ethenyl-2-hydroxyphenyl)oxidanesulfonic acid
meta_454	454	215.119	TRUE	0.88346	13230.9	-5.81e-05	C13H16N2O	-H(-)	100	HMDB0029837	Nb-Acetyl-Nb-methyltryptamine	Organoheterocyclic compounds	Indoles and derivatives	Indoles	Aromatic heteropolycyclic compounds	3-alkylindoles	NA	Nb-Acetyl-Nb-methyltryptamine
meta_455	455	215.166	TRUE	0.686284	14420.6	-0.00116862	C12H24O3	-H(-)	76	HMDB0000387	3-Hydroxydodecanoic acid	Organic acids and derivatives	Hydroxy acids and derivatives	Medium-chain hydroxy acids and derivatives	Aliphatic acyclic compounds	Medium-chain hydroxy acids and derivatives	yes	3-Hydroxydodecanoic acid
meta_456	456	216.134	TRUE	0.53776	6235.69	0.000942251	C9H19N3O3	-H(-)	100	HMDB0012230	Gamma-glutamyl-L-putrescine	Organic acids and derivatives	Carboxylic acids and derivatives	Amino acids, peptides, and analogues	Aliphatic acyclic compounds	Glutamine and derivatives	NA	Gamma-glutamyl-L-putrescine
meta_457	457	217.017	TRUE	0.707561	71159.1	0.000433585	C8H10O5S	-H(-)	100	HMDB0041785	Tyrosol 4-sulfate	Organic acids and derivatives	Organic sulfuric acids and derivatives	Arylsulfates	Aromatic homomonocyclic compounds	Phenylsulfates	NA	Tyrosol 4-sulfate
meta_458	458	218.103	TRUE	0.833154	38629	0.00055977	C9H17NO5	-H(-)	100	HMDB0000210	Pantothenic acid	Organooxygen compounds	Alcohols and polyols	Polyols	Aliphatic acyclic compounds	Polyols	NA	Pantothenic acid
meta_459	459	219.034	TRUE	0.703828	24170.3	0.000635506	C9H16S3	-H(-)	100	HMDB0038967	1-Propenyl 1-(1-propenylthio)propyl disulfide	Organosulfur compounds	Thioethers	Thioenol ethers	Aliphatic acyclic compounds	Thioenol ethers	NA	1-Propenyl 1-(1-propenylthio)propyl disulfide
meta_460	460	219.045	TRUE	0.598503	12042.6	-0.000569726	C7H12N2O4S	-H(-)	100	HMDB0041942	N-Acetyl-S-(N-methylcarbamoyl)cysteine	Organic acids and derivatives	Carboxylic acids and derivatives	Amino acids, peptides, and analogues	Aliphatic acyclic compounds	N-acyl-alpha amino acids	NA	N-Acetyl-S-(N-methylcarbamoyl)cysteine
meta_461	461	219.048	TRUE	0.75276	11807.7	0.000161102	C12H12O2S	-H(-)	100	HMDB0034857	2-(2-Thienylmethylene)-1,6-dioxaspiro[4.4]non-3-ene	Organoheterocyclic compounds	Heteroaromatic compounds	Not classified	Aromatic heteropolycyclic compounds	Heteroaromatic compounds	NA	2-(2-Thienylmethylene)-1,6-dioxaspiro[4.4]non-3-ene
meta_462	462	219.138	TRUE	0.164437	8088.31	0.00113377	C14H20O2	-H(-)	81	HMDB0013817	2,6-Di-tert-butylbenzoquinone	Lipids and lipid-like molecules	Prenol lipids	Monoterpenoids	Aliphatic homomonocyclic compounds	Monocyclic monoterpenoids	NA	2,6-Di-tert-butylbenzoquinone
meta_463	463	219.175	TRUE	0.0344445	12438.5	0.000768805	C15H24O	-H(-)	100	HMDB0013688	Nootkatol	Lipids and lipid-like molecules	Prenol lipids	Sesquiterpenoids	Aliphatic homopolycyclic compounds	Eremophilane, 8,9-secoeremophilane and furoeremophilane sesquiterpenoids	NA	Nootkatol
meta_464	464	220.028	TRUE	0.644072	12132.2	0.000361813	C7H11NO5S	-H(-)	100	HMDB0002135	S-(3-oxo-3-carboxy-n-propyl)cysteine	Organic acids and derivatives	Carboxylic acids and derivatives	Amino acids, peptides, and analogues	Aliphatic acyclic compounds	Cysteine and derivatives	NA	S-(3-oxo-3-carboxy-n-propyl)cysteine
meta_465	465	220.061	TRUE	0.521869	6606.61	0.000395191	C11H11NO4	-H(-)	100	HMDB0038990	Methyl 5-hydroxyoxindole-3-acetate	Organoheterocyclic compounds	Indoles and derivatives	Indolyl carboxylic acids and derivatives	Aromatic heteropolycyclic compounds	Indolyl carboxylic acids and derivatives	NA	Methyl 5-hydroxyoxindole-3-acetate
meta_466	466	220.083	TRUE	0.55022	5802.83	-9.09e-05	C8H15NO6	-H(-)	100	HMDB0000212	N-Acetylgalactosamine	Organic oxygen compounds	Organooxygen compounds	Carbohydrates and carbohydrate conjugates	Aliphatic heteromonocyclic compounds	N-acyl-alpha-hexosamines	NA	N-Acetylgalactosamine
meta_467	467	220.145	TRUE	-0.206166	15072.8	0.000232916	C12H19N3O	-H(-)	100	HMDB0015299	Procarbazine	Benzenoids	Benzene and substituted derivatives	Benzoic acids and derivatives	Aromatic homomonocyclic compounds	Benzamides	NA	Procarbazine
meta_468	468	221.066	TRUE	0.686316	12466.1	0.000410496	C8H14O7	-H(-)	100	HMDB0010325	Ethyl glucuronide	Organic oxygen compounds	Organooxygen compounds	Carbohydrates and carbohydrate conjugates	Aliphatic heteromonocyclic compounds	O-glucuronides	yes	Ethyl glucuronide
meta_469	469	221.082	TRUE	0.350486	12633.6	0.000352798	C12H14O4	-H(-)	100	HMDB0002056	Monoisobutyl phthalic acid	Benzenoids	Benzene and substituted derivatives	Benzoic acids and derivatives	Aromatic homomonocyclic compounds	Benzoic acid esters	NA	Monoisobutyl phthalic acid
meta_470	470	221.093	TRUE	0.538167	6350.97	0.000479113	C11H14N2O3	-H(-)	100	HMDB0028848	Glycyl-Phenylalanine	Organic acids and derivatives	Carboxylic acids and derivatives	Amino acids, peptides, and analogues	Aromatic homomonocyclic compounds	Dipeptides	NA	Glycyl-Phenylalanine
meta_471	471	221.117	TRUE	0.205257	8885.92	0.000913401	C13H18O3	-H(-)	100	HMDB0032121	Annuionone B	Organoheterocyclic compounds	Oxepanes	Not classified	Aliphatic heteropolycyclic compounds	Oxepanes	NA	Annuionone B
meta_472	472	221.13	TRUE	0.624768	3979.36	-0.000231662	C12H18N2O2	-H(-)	100	HMDB0060678	3-Hydroxymonoethylglycinexylidide	Organic acids and derivatives	Carboxylic acids and derivatives	Amino acids, peptides, and analogues	Aromatic homomonocyclic compounds	Alpha amino acid amides	NA	3-Hydroxymonoethylglycinexylidide
meta_473	473	222.077	TRUE	0.461669	9729.59	0.000522964	C11H13NO4	-H(-)	100	HMDB0000866	N-Acetyl-L-tyrosine	Organic acids and derivatives	Carboxylic acids and derivatives	Amino acids, peptides, and analogues	Aromatic homomonocyclic compounds	Tyrosine and derivatives	yes	N-Acetyl-L-tyrosine
meta_474	474	222.113	TRUE	0.521169	7434.87	0.00082232	C12H17NO3	-H(-)	100	HMDB0015168	Cerulenin	Organoheterocyclic compounds	Epoxides	Oxirane carboxylic acids and derivatives	Aliphatic heteromonocyclic compounds	Oxirane carboxylic acids and derivatives	NA	Cerulenin
meta_475	475	222.149	TRUE	0.591255	4934.75	0.0006195	C13H21NO2	-H(-)	100	HMDB0029828	Dihydrodioscorine	Organoheterocyclic compounds	Azaspirodecane derivatives	Not classified	Aliphatic heteropolycyclic compounds	Azaspirodecane derivatives	NA	Dihydrodioscorine
meta_476	476	224.076	TRUE	0.615174	56266.5	-0.000436249	C11H15NO2S	-H(-)	100	HMDB0031782	Ethiofencarb	Benzenoids	Benzene and substituted derivatives	Phenyl methylcarbamates	Aromatic homomonocyclic compounds	Phenyl methylcarbamates	NA	Ethiofencarb
meta_477	477	224.105	TRUE	0.873196	17183.5	-0.00110395	C10H15N3O3	-H(-)	85	HMDB0041953	Nnal-N-oxide	Organoheterocyclic compounds	Pyridines and derivatives	Pyridinium derivatives	Aromatic heteromonocyclic compounds	Pyridinium derivatives	NA	Nnal-N-oxide
meta_478	478	224.119	TRUE	0.861343	10028.2	0.000534186	C14H15N3	-H(-)	100	HMDB0032141	4-(Dimethylamino)azobenzene	Organoheterocyclic compounds	Azobenzenes	Not classified	Aromatic homomonocyclic compounds	Azobenzenes	NA	4-(Dimethylamino)azobenzene
meta_479	479	225.063	TRUE	0.931556	213292	0.000363809	C8H10N4O4	-H(-)	100	HMDB0011105	5-Acetylamino-6-formylamino-3-methyluracil	Organoheterocyclic compounds	Diazines	Pyrimidines and pyrimidine derivatives	Aromatic heteromonocyclic compounds	Hydroxypyrimidines	yes	5-Acetylamino-6-formylamino-3-methyluracil
meta_480	480	225.1	TRUE	0.940387	31876	-0.000973536	C9H14N4O3	-H(-)	100	HMDB0000033	Carnosine	Organic acids and derivatives	Peptidomimetics	Hybrid peptides	Aromatic heteromonocyclic compounds	Hybrid peptides	NA	Carnosine
meta_481	481	225.125	TRUE	0.786188	15555	-0.000864048	C11H18N2O3	-H(-)	100	HMDB0014457	Pentobarbital	Organoheterocyclic compounds	Diazines	Pyrimidines and pyrimidine derivatives	Aliphatic heteromonocyclic compounds	Pyrimidones	NA	Pentobarbital
meta_482	482	225.149	TRUE	0.616325	15118.7	0.00051479	C13H22O3	-H(-)	100	HMDB0031740	Methyl dihydrojasmonate	Lipids and lipid-like molecules	Fatty Acyls	Lineolic acids and derivatives	Aliphatic homomonocyclic compounds	Jasmonic acids	NA	Methyl dihydrojasmonate
meta_483	483	225.185	TRUE	0.864163	84257.9	0.00053575	C14H26O2	-H(-)	100	HMDB0000499	5-Tetradecenoic acid	Lipids and lipid-like molecules	Fatty Acyls	Fatty acids and conjugates	Aliphatic acyclic compounds	Long-chain fatty acids	NA	5-Tetradecenoic acid
meta_484	484	225.22	TRUE	0.723658	11319	0.00230389	C15H30O	-H(-)	12	HMDB0031078	Pentadecanal	Lipids and lipid-like molecules	Fatty Acyls	Fatty aldehydes	Aliphatic acyclic compounds	Fatty aldehydes	NA	Pentadecanal
meta_485	485	226.088	TRUE	0.714196	31203.2	-0.000506036	C14H13NO2	-H(-)	100	HMDB0033452	Koenoline	Organoheterocyclic compounds	Indoles and derivatives	Carbazoles	Aromatic heteropolycyclic compounds	Carbazoles	NA	Koenoline
meta_486	486	226.11	TRUE	0.601983	7426.23	-0.000584058	C12H13N5	-H(-)	100	HMDB0032928	2-Amino-3,4,8-trimethyl-3H-imidazo[4,5-f]quinoxaline	Organoheterocyclic compounds	Diazanaphthalenes	Benzodiazines	Aromatic heteropolycyclic compounds	Quinoxalines	NA	2-Amino-3,4,8-trimethyl-3H-imidazo[4,5-f]quinoxaline
meta_487	487	227.002	TRUE	0.827622	80941.4	-0.000413175	C9H8O5S	-H(-)	100	HMDB0135289	{4-[(1E)-3-oxoprop-1-en-1-yl]phenyl}oxidanesulfonic acid	Organic acids and derivatives	Organic sulfuric acids and derivatives	Arylsulfates	Aromatic homomonocyclic compounds	Phenylsulfates	NA	{4-[(1E)-3-oxoprop-1-en-1-yl]phenyl}oxidanesulfonic acid
meta_488	488	227.043	TRUE	0.772212	20151.5	0.000392756	C5H13N2O6P	-H(-)	100	HMDB0031950	L-2-Aminoethyl seryl phosphate	Organic acids and derivatives	Carboxylic acids and derivatives	Amino acids, peptides, and analogues	Aliphatic acyclic compounds	Alpha amino acids	NA	L-2-Aminoethyl seryl phosphate
meta_489	489	227.079	TRUE	0.805355	82287.2	-0.000451895	C8H12N4O4	-H(-)	100	HMDB0015391	Decitabine	Organoheterocyclic compounds	Triazines	Triazinones	Aromatic heteromonocyclic compounds	Triazinones	NA	Decitabine
meta_490	490	227.092	TRUE	0.695512	18023.7	0.000343922	C11H16O5	-H(-)	100	HMDB0032496	Propyl propane thiosulfonate	Organooxygen compounds	Carbonyl compounds	Ketones	Aliphatic homomonocyclic compounds	Cyclohexanones	NA	Propyl propane thiosulfonate
meta_491	491	227.128	TRUE	0.522209	18792.4	0.00108077	C12H20O4	-H(-)	88	HMDB0000933	Traumatic acid	Lipids and lipid-like molecules	Fatty Acyls	Fatty acids and conjugates	Aliphatic acyclic compounds	Medium-chain fatty acids	NA	Traumatic acid
meta_492	492	227.201	TRUE	0.92127	432172	0.000737106	C14H28O2	-H(-)	100	HMDB0000806	Myristic acid	Lipids and lipid-like molecules	Fatty Acyls	Fatty acids and conjugates	Aliphatic acyclic compounds	Long-chain fatty acids	yes	Myristic acid
meta_493	493	228.967	TRUE	0.860749	17133.4	-0.000845643	C4H6O9S	-H(-)	100	HMDB0127958	2-hydroxy-3-(sulfooxy)butanedioic acid	Lipids and lipid-like molecules	Fatty Acyls	Fatty acids and conjugates	Aliphatic acyclic compounds	Sulfated fatty acids	NA	2-hydroxy-3-(sulfooxy)butanedioic acid
meta_494	494	229.017	TRUE	0.823512	61496.6	0.000348347	C9H10O5S	-H(-)	100	HMDB0127980	(4-ethenyl-2-methoxyphenyl)oxidanesulfonic acid	Organic acids and derivatives	Organic sulfuric acids and derivatives	Arylsulfates	Aromatic homomonocyclic compounds	Phenylsulfates	NA	(4-ethenyl-2-methoxyphenyl)oxidanesulfonic acid
meta_495	495	229.035	TRUE	0.673628	18053.4	0.000905758	C10H14O2S2	-H(-)	100	HMDB0039670	3,3'-Dithiobis[4,5-dihydro-2-methylfuran]	Organoheterocyclic compounds	Dihydrofurans	Not classified	Aliphatic heteromonocyclic compounds	Dihydrofurans	NA	3,3'-Dithiobis[4,5-dihydro-2-methylfuran]
meta_496	496	229.054	TRUE	0.836667	75752.4	0.000428877	C10H14O4S	-H(-)	100	HMDB0062720	Thymol Sulfate	Organic acids and derivatives	Organic sulfuric acids and derivatives	Arylsulfates	Aromatic homomonocyclic compounds	Phenylsulfates	NA	Thymol Sulfate
meta_497	497	229.108	TRUE	0.708322	13816.3	0.000928009	C12H22S2	-H(-)	100	HMDB0041448	Dicyclohexyl disulfide	Organosulfur compounds	Organic disulfides	Dialkyldisulfides	Aliphatic homomonocyclic compounds	Dialkyldisulfides	NA	Dicyclohexyl disulfide
meta_498	498	230.013	TRUE	0.878985	105174	5.35e-05	C8H9NO5S	-H(-)	100	HMDB0059911	Paracetamol sulfate	Organic acids and derivatives	Organic sulfuric acids and derivatives	Arylsulfates	Aromatic homomonocyclic compounds	Phenylsulfates	yes	Paracetamol sulfate
meta_499	499	230.996	TRUE	0.815609	96924	0.000430925	C8H8O6S	-H(-)	100	HMDB0041646	2,4-Dihydroxyacetophenone 5-sulfate	Organic oxygen compounds	Organooxygen compounds	Carbonyl compounds	Aromatic homomonocyclic compounds	Alkyl-phenylketones	NA	2,4-Dihydroxyacetophenone 5-sulfate
meta_500	500	231.015	TRUE	0.814875	27612.3	-0.000629652	C8H8O8	-H(-)	100	HMDB0059808	Acetyl citrate	Organic acids and derivatives	Carboxylic acids and derivatives	Tetracarboxylic acids and derivatives	Aliphatic acyclic compounds	Tetracarboxylic acids and derivatives	NA	Acetyl citrate
meta_501	501	231.033	TRUE	0.78941	43618.3	0.000661528	C9H12O5S	-H(-)	100	HMDB0127988	(4-ethyl-2-methoxyphenyl)oxidanesulfonic acid	Organic acids and derivatives	Organic sulfuric acids and derivatives	Arylsulfates	Aromatic homomonocyclic compounds	Phenylsulfates	NA	(4-ethyl-2-methoxyphenyl)oxidanesulfonic acid
meta_502	502	231.049	TRUE	0.743262	18356.5	-0.000885902	C13H12O2S	-H(-)	100	HMDB0031070	(2E,11Z)-5-[5-(Methylthio)-4-penten-2-ynyl]-2-furanacrolein	Lipids and lipid-like molecules	Fatty Acyls	Fatty acids and conjugates	Aromatic heteromonocyclic compounds	Furanoid fatty acids	NA	(2E,11Z)-5-[5-(Methylthio)-4-penten-2-ynyl]-2-furanacrolein
meta_503	503	231.099	TRUE	0.693941	12698.6	-0.000637752	C9H16N2O5	-H(-)	100	HMDB0001199	N2-Succinyl-L-ornithine	Organic acids and derivatives	Carboxylic acids and derivatives	Amino acids, peptides, and analogues	Aliphatic acyclic compounds	N-acyl-alpha amino acids	NA	N2-Succinyl-L-ornithine
meta_504	504	231.113	TRUE	0.739174	10082.5	0.000914622	C13H16N2O2	-H(-)	100	HMDB0001389	Melatonin	Organoheterocyclic compounds	Indoles and derivatives	Indoles	Aromatic heteropolycyclic compounds	3-alkylindoles	yes	Melatonin
meta_505	505	231.136	TRUE	0.481383	9239.19	-0.00059968	C10H20N2O4	-H(-)	100	HMDB0013075	Spermic acid 2	Organic acids and derivatives	Carboxylic acids and derivatives	Amino acids, peptides, and analogues	Aliphatic acyclic compounds	Beta amino acids and derivatives	NA	Spermic acid 2
meta_506	506	231.175	TRUE	0.0190648	13001	0.000897146	C16H24O	-H(-)	100	HMDB0029704	1-(2,6,6-Trimethyl-2-cyclohexen-1-yl)-1,6-heptadien-3-one	Lipids and lipid-like molecules	Prenol lipids	Sesquiterpenoids	Aliphatic homomonocyclic compounds	Sesquiterpenoids	NA	1-(2,6,6-Trimethyl-2-cyclohexen-1-yl)-1,6-heptadien-3-one
meta_507	507	232.028	TRUE	0.770145	20365.3	0.000693536	C8H11NO5S	-H(-)	100	HMDB0004148	Dopamine 4-sulfate	Organic acids and derivatives	Organic sulfuric acids and derivatives	Arylsulfates	Aromatic homomonocyclic compounds	Phenylsulfates	yes	Dopamine 4-sulfate
meta_508	508	232.116	TRUE	0.524007	4883.38	0.000173577	C14H19NS	-H(-)	100	HMDB0040033	2-Heptylbenzothiazole	Organoheterocyclic compounds	Benzothiazoles	Not classified	Aromatic heteropolycyclic compounds	Benzothiazoles	NA	2-Heptylbenzothiazole
meta_509	509	232.129	TRUE	0.454304	4738.02	0.00102428	C9H19N3O4	-H(-)	96	HMDB0028960	Lysyl-Serine	Organic acids and derivatives	Carboxylic acids and derivatives	Amino acids, peptides, and analogues	Aliphatic acyclic compounds	Dipeptides	NA	Lysyl-Serine
meta_510	510	233.011	TRUE	0.212804	48696.5	0.00111291	C8H10O6S	-H(-)	83	HMDB0128030	(4-ethyl-2,6-dihydroxyphenyl)oxidanesulfonic acid	Organic acids and derivatives	Organic sulfuric acids and derivatives	Arylsulfates	Aromatic homomonocyclic compounds	Phenylsulfates	NA	(4-ethyl-2,6-dihydroxyphenyl)oxidanesulfonic acid
meta_511	511	233.061	TRUE	0.644144	11412	-0.000662114	C8H14N2O4S	-H(-)	100	HMDB0028776	Cysteinyl-Hydroxyproline	Organic acids and derivatives	Carboxylic acids and derivatives	Amino acids, peptides, and analogues	Aliphatic heteromonocyclic compounds	Dipeptides	NA	Cysteinyl-Hydroxyproline
meta_512	512	233.077	TRUE	0.403994	35255.4	0.000916596	C8H14N2O6	-H(-)	100	HMDB0011169	L-beta-aspartyl-L-threonine	Organic acids and derivatives	Peptidomimetics	Hybrid peptides	Aliphatic acyclic compounds	Hybrid peptides	NA	L-beta-aspartyl-L-threonine
meta_513	513	234.149	TRUE	0.880967	7142.49	0.000568031	C14H21NO2	-H(-)	100	HMDB0060851	N,O-Didesmethyltramadol	Benzenoids	Benzene and substituted derivatives	Cyclohexylphenols	Aromatic homomonocyclic compounds	Cyclohexylphenols	NA	N,O-Didesmethyltramadol
meta_514	514	235.061	TRUE	0.527046	11593.5	0.000319962	C12H12O5	-H(-)	100	HMDB0030582	Dillapional	Phenylpropanoids and polyketides	Cinnamaldehydes	Not classified	Aromatic heteropolycyclic compounds	Cinnamaldehydes	NA	Dillapional
meta_515	515	235.108	TRUE	0.564507	5971.48	0.00106083	C12H16N2O3	-H(-)	91	HMDB0015444	Hexobarbital	Organoheterocyclic compounds	Diazines	Pyrimidines and pyrimidine derivatives	Aliphatic heteromonocyclic compounds	Pyrimidones	NA	Hexobarbital
meta_516	516	236.077	TRUE	0.450835	5365.39	0.000596712	C8H15NO7	-H(-)	100	HMDB0037848	N-(1-Deoxy-1-fructosyl)glycine	Organic oxygen compounds	Organooxygen compounds	Carbohydrates and carbohydrate conjugates	Aliphatic heteromonocyclic compounds	C-glycosyl compounds	NA	N-(1-Deoxy-1-fructosyl)glycine
meta_517	517	236.092	TRUE	0.590785	8739.86	0.000431153	C12H15NO4	-H(-)	100	HMDB0013067	Salsoline-1-carboxylate	Organoheterocyclic compounds	Tetrahydroisoquinolines	Not classified	Aromatic heteropolycyclic compounds	Tetrahydroisoquinolines	NA	Salsoline-1-carboxylate
meta_518	518	237.025	TRUE	0.761128	12269.1	-0.00106178	C8H10O5S	.F(-)	36	HMDB0041785	Tyrosol 4-sulfate	Organic acids and derivatives	Organic sulfuric acids and derivatives	Arylsulfates	Aromatic homomonocyclic compounds	Phenylsulfates	NA	Tyrosol 4-sulfate
meta_519	519	237.033	TRUE	0.640287	7224.73	0.000797214	C10H10N2O3S	-H(-)	100	HMDB0062793	6-(2-amino-2-carboxyethyl)-4-hydroxybenzothiazole	Organic acids and derivatives	Carboxylic acids and derivatives	Amino acids, peptides, and analogues	Aromatic heteropolycyclic compounds	Alpha amino acids	NA	6-(2-amino-2-carboxyethyl)-4-hydroxybenzothiazole
meta_520	520	237.062	TRUE	0.817293	27344	-0.000848613	C8H14O8	-H(-)	100	HMDB0131294	3,4,5-trihydroxy-6-(2-hydroxyethoxy)oxane-2-carboxylic acid	Organic oxygen compounds	Organooxygen compounds	Carbohydrates and carbohydrate conjugates	Aliphatic heteromonocyclic compounds	O-glucuronides	NA	3,4,5-trihydroxy-6-(2-hydroxyethoxy)oxane-2-carboxylic acid
meta_521	521	237.075	TRUE	0.761114	19418.1	0.00227974	C12H14O5	-H(-)	13	HMDB0002511	3,4,5-Trimethoxycinnamic acid	Phenylpropanoids and polyketides	Cinnamic acids and derivatives	Hydroxycinnamic acids and derivatives	Aromatic homomonocyclic compounds	Coumaric acids and derivatives	NA	3,4,5-Trimethoxycinnamic acid
meta_522	522	237.112	TRUE	0.444849	11546.3	0.000850346	C13H18O4	-H(-)	100	HMDB0033191	2,2,4,4,-Tetramethyl-6-(1-oxopropyl)-1,3,5-cyclohexanetrione	Lipids and lipid-like molecules	Prenol lipids	Monoterpenoids	Aliphatic homomonocyclic compounds	Monocyclic monoterpenoids	NA	2,2,4,4,-Tetramethyl-6-(1-oxopropyl)-1,3,5-cyclohexanetrione
meta_523	523	237.124	TRUE	0.617094	6607.24	0.000175284	C12H18N2O3	-H(-)	100	HMDB0014562	Secobarbital	Organoheterocyclic compounds	Diazines	Pyrimidines and pyrimidine derivatives	Aliphatic heteromonocyclic compounds	Barbituric acid derivatives	NA	Secobarbital
meta_524	524	237.185	TRUE	0.377937	9117.96	0.000988165	C15H26O2	-H(-)	100	HMDB0029350	Geranyl 3-methylbutanoate	Lipids and lipid-like molecules	Fatty Acyls	Fatty alcohol esters	Aliphatic acyclic compounds	Fatty alcohol esters	NA	Geranyl 3-methylbutanoate
meta_525	525	237.221	TRUE	0.656289	9803.37	0.00116396	C16H30O	-H(-)	77	HMDB0034181	3-Methylcyclopentadecanone	Organooxygen compounds	Carbonyl compounds	Ketones	Aliphatic homomonocyclic compounds	Cyclic ketones	NA	3-Methylcyclopentadecanone
meta_526	526	238.052	TRUE	0.707298	15880.5	-0.00106022	C14H9NO3	-H(-)	91	HMDB0033757	Marcanine A	Organoheterocyclic compounds	Quinolines and derivatives	Benzoquinolines	Aromatic heteropolycyclic compounds	Benzoquinolines	NA	Marcanine A
meta_527	527	239.016	TRUE	0.504208	26927.6	0.000772824	C6H12N2O4S2	-H(-)	100	HMDB0000192	L-Cystine	Organic acids and derivatives	Carboxylic acids and derivatives	Amino acids, peptides, and analogues	Aliphatic acyclic compounds	L-cysteine-S-conjugates	yes	L-Cystine
meta_528	528	239.035	TRUE	0.478195	23384.9	0.000251808	C14H8O4	-H(-)	100	HMDB0029752	Dantron	Benzenoids	Anthracenes	Anthraquinones	Aromatic homopolycyclic compounds	Anthraquinones	NA	Dantron
meta_529	529	239.092	TRUE	0.735342	142057	0.00084367	C12H16O5	-H(-)	100	HMDB0030254	3-(3,4,5-Trimethoxyphenyl)propanoic acid	Phenylpropanoids and polyketides	Phenylpropanoic acids	Not classified	Aromatic homomonocyclic compounds	Phenylpropanoic acids	NA	3-(3,4,5-Trimethoxyphenyl)propanoic acid
meta_530	530	239.15	TRUE	0.701275	6760.52	0.000891446	C11H20N4O2	-H(-)	100	HMDB0039160	L-Gizzerosine	Organic acids and derivatives	Carboxylic acids and derivatives	Amino acids, peptides, and analogues	Aromatic heteromonocyclic compounds	Alpha amino acids	NA	L-Gizzerosine
meta_531	531	239.237	TRUE	0.451077	5846.21	0.00145156	C16H32O	-H(-)	48	HMDB0001551	Palmitaldehyde	Lipids and lipid-like molecules	Fatty Acyls	Fatty aldehydes	Aliphatic acyclic compounds	Fatty aldehydes	NA	Palmitaldehyde
meta_532	532	241.144	TRUE	0.448811	16876.8	0.00090834	C13H22O4	-H(-)	100	HMDB0030987	2-Carboxy-4-dodecanolide	Organoheterocyclic compounds	Lactones	Gamma butyrolactones	Aliphatic heteromonocyclic compounds	Gamma butyrolactones	NA	2-Carboxy-4-dodecanolide
meta_533	533	242.079	TRUE	0.789169	43482.2	-0.000830053	C9H13N3O5	-H(-)	100	HMDB0000089	Cytidine	Nucleosides, nucleotides, and analogues	Pyrimidine nucleosides	Not classified	Aromatic heteromonocyclic compounds	Pyrimidine nucleosides	yes	Cytidine
meta_534	534	242.138	TRUE	0.673593	7521.97	0.00168734	C12H21NO4	-H(-)	33	HMDB0002366	Tiglylcarnitine	Lipids and lipid-like molecules	Fatty Acyls	Fatty acid esters	Aliphatic acyclic compounds	Acyl carnitines	yes	Tiglylcarnitine
meta_535	535	242.175	TRUE	0.354468	40277.3	0.000676775	C13H25NO3	-H(-)	100	HMDB0013286	N-Undecanoylglycine	Organic acids and derivatives	Carboxylic acids and derivatives	Amino acids, peptides, and analogues	Aliphatic acyclic compounds	N-acyl-alpha amino acids	NA	N-Undecanoylglycine
meta_536	536	242.996	TRUE	0.772982	32448.9	0.000661239	C9H8O6S	-H(-)	100	HMDB0124975	(2E)-3-[3-(sulfooxy)phenyl]prop-2-enoic acid	Phenylpropanoids and polyketides	Cinnamic acids and derivatives	Hydroxycinnamic acids and derivatives	Aromatic homomonocyclic compounds	Coumaric acids and derivatives	NA	(2E)-3-[3-(sulfooxy)phenyl]prop-2-enoic acid
meta_537	537	243.032	TRUE	0.823857	56782.3	0.000996397	C10H12O5S	-H(-)	100	HMDB0059983	4-phenylbutanic acid-O-sulphate	Benzenoids	Benzene and substituted derivatives	Not classified	Aromatic homomonocyclic compounds	Benzene and substituted derivatives	NA	4-phenylbutanic acid-O-sulphate
meta_538	538	243.052	TRUE	0.777254	93162.8	-0.000700261	C10H12O7	-H(-)	100	HMDB0039177	1-O-Galloylglycerol	Benzenoids	Benzene and substituted derivatives	Benzoic acids and derivatives	Aromatic homomonocyclic compounds	Galloyl esters	NA	1-O-Galloylglycerol
meta_539	539	243.062	TRUE	0.938006	127136	0.000317888	C9H12N2O6	-H(-)	100	HMDB0000296	Uridine	Nucleosides, nucleotides, and analogues	Pyrimidine nucleosides	Not classified	Aromatic heteromonocyclic compounds	Pyrimidine nucleosides	yes	Uridine
meta_540	540	243.134	TRUE	0.710873	12235	0.000749081	C11H20N2O4	-H(-)	100	HMDB0028866	Hydroxyprolyl-Isoleucine	Organic acids and derivatives	Carboxylic acids and derivatives	Amino acids, peptides, and analogues	Aliphatic heteromonocyclic compounds	Peptides	NA	Hydroxyprolyl-Isoleucine
meta_541	541	243.195	TRUE	0.499866	11325.8	0.00133588	C14H28O3	-H(-)	58	HMDB0002261	2-Hydroxymyristic acid	Lipids and lipid-like molecules	Fatty Acyls	Fatty acids and conjugates	Aliphatic acyclic compounds	Long-chain fatty acids	NA	2-Hydroxymyristic acid
meta_542	542	244.095	TRUE	0.573541	6938.93	-0.00152901	C9H15N3O5	-H(-)	43	HMDB0028732	Asparaginyl-Hydroxyproline	Organic acids and derivatives	Carboxylic acids and derivatives	Amino acids, peptides, and analogues	Aliphatic heteromonocyclic compounds	Dipeptides	NA	Asparaginyl-Hydroxyproline
meta_543	543	244.106	TRUE	0.551579	5091.21	0.000588283	C10H17N2O5	-H(-)	100	HMDB0029126	Valyl-Glutamate	Organic acids and derivatives	Carboxylic acids and derivatives	Amino acids, peptides, and analogues	Aliphatic acyclic compounds	Dipeptides	NA	Valyl-Glutamate
meta_544	544	244.129	TRUE	0.51921	7306.14	0.000881683	C10H19N3O4	-H(-)	100	HMDB0028734	Asparaginyl-Isoleucine	Organic acids and derivatives	Carboxylic acids and derivatives	Amino acids, peptides, and analogues	Aliphatic acyclic compounds	Dipeptides	NA	Asparaginyl-Isoleucine
meta_545	545	244.157	TRUE	0.593987	4853.31	-0.00121769	C12H23NO4	-H(-)	70	HMDB0000378	2-Methylbutyroylcarnitine	Lipids and lipid-like molecules	Fatty Acyls	Fatty acid esters	Aliphatic acyclic compounds	Acyl carnitines	NA	2-Methylbutyroylcarnitine
meta_546	546	244.975	TRUE	0.766983	20548.8	0.000670828	C8H6O7S	-H(-)	100	HMDB0032822	5-Sulfo-1,3-benzenedicarboxylic acid	Benzenoids	Benzene and substituted derivatives	Benzenesulfonic acids and derivatives	Aromatic homomonocyclic compounds	3-sulfobenzoic acids	NA	5-Sulfo-1,3-benzenedicarboxylic acid
meta_547	547	245.048	TRUE	0.871245	42006.2	0.000800462	C10H14O5S	-H(-)	100	HMDB0135750	[3-(4-methoxyphenyl)propoxy]sulfonic acid	Benzenoids	Phenol ethers	Anisoles	Aromatic homomonocyclic compounds	Anisoles	NA	[3-(4-methoxyphenyl)propoxy]sulfonic acid
meta_548	548	245.076	TRUE	0.775621	22457.8	0.0023838	C9H14N2O6	-H(-)	11	HMDB0000497	5,6-Dihydrouridine	Organic oxygen compounds	Organooxygen compounds	Carbohydrates and carbohydrate conjugates	Aliphatic heteromonocyclic compounds	Glycosylamines	NA	5,6-Dihydrouridine
meta_549	549	245.114	TRUE	0.782052	20190.3	0.000416741	C10H18N2O5	-H(-)	100	HMDB0011166	L-beta-aspartyl-L-leucine	Organic acids and derivatives	Peptidomimetics	Hybrid peptides	Aliphatic acyclic compounds	Hybrid peptides	NA	L-beta-aspartyl-L-leucine
meta_550	550	246.017	TRUE	0.691109	79924.8	0.000132122	C8H10NO6P	-H(-)	100	HMDB0001491	Pyridoxal 5'-phosphate	Organoheterocyclic compounds	Pyridines and derivatives	Pyridine carboxaldehydes	Aromatic heteromonocyclic compounds	Pyridoxals and derivatives	NA	Pyridoxal 5'-phosphate
meta_551	551	246.992	TRUE	0.797253	64011	-0.000305984	C8H8O7S	-H(-)	100	HMDB0041788	Vanillic acid 4-sulfate	Benzenoids	Benzene and substituted derivatives	Benzoic acids and derivatives	Aromatic homomonocyclic compounds	M-methoxybenzoic acids and derivatives	NA	Vanillic acid 4-sulfate
meta_552	552	247.093	TRUE	0.443552	516380	0.000963735	C9H16N2O6	-H(-)	100	HMDB0028829	Glutamylthreonine	Organic acids and derivatives	Carboxylic acids and derivatives	Amino acids, peptides, and analogues	Aliphatic acyclic compounds	Dipeptides	NA	Glutamylthreonine
meta_553	553	248.126	TRUE	0.486613	8290.96	0.00037937	C11H21O6	-H(-)	100	HMDB0039845	3-Oxooctanoic acid glycerides	Organic acids and derivatives	Keto acids and derivatives	Medium-chain keto acids and derivatives	Not classified	Medium-chain keto acids and derivatives	NA	3-Oxooctanoic acid glycerides
meta_554	554	248.94	TRUE	0.450212	8381.72	-0.00154436	C4H10O4S4	-H(-)	42	HMDB0041188	Bis(methylsulfonylmethyl) disulfide	Organosulfur compounds	Sulfonyls	Sulfones	Aliphatic acyclic compounds	Sulfones	NA	Bis(methylsulfonylmethyl) disulfide
meta_555	555	249.162	TRUE	0.0190403	16666.1	-0.00103395	C14H22N2O2	-H(-)	95	HMDB0015124	Rivastigmine	Benzenoids	Benzene and substituted derivatives	Phenoxy compounds	Aromatic homomonocyclic compounds	Phenoxy compounds	NA	Rivastigmine
meta_556	556	250.217	TRUE	0.560694	3743.46	0.000206136	C16H29NO	-H(-)	100	HMDB0030275	Herculin	Lipids and lipid-like molecules	Fatty Acyls	Fatty amides	Aliphatic acyclic compounds	N-acyl amines	NA	Herculin
meta_557	557	251.237	TRUE	0.663675	6322.19	0.00116519	C17H32O	-H(-)	77	HMDB0013813	13-Heptadecyn-1-ol	Lipids and lipid-like molecules	Fatty Acyls	Fatty alcohols	Aliphatic acyclic compounds	Long-chain fatty alcohols	NA	13-Heptadecyn-1-ol
meta_558	558	253.16	TRUE	0.613419	7087.74	0.000511186	C10H28N2OP2	-H(-)	100	HMDB0059959	2-({2-[Dimethyl(2-phosphanylethyl)ammonio]ethyl}dimethylammonio)ethyl phosphinite	Organic nitrogen compounds	Organonitrogen compounds	Quaternary ammonium salts	Aliphatic acyclic compounds	Tetraalkylammonium salts	NA	2-({2-[Dimethyl(2-phosphanylethyl)ammonio]ethyl}dimethylammonio)ethyl phosphinite
meta_559	559	254.981	TRUE	0.782461	41540	0.000465656	C6H8O9S	-H(-)	100	HMDB0060649	Ascorbic acid-2-sulfate	Organoheterocyclic compounds	Dihydrofurans	Furanones	Aliphatic heteromonocyclic compounds	Butenolides	NA	Ascorbic acid-2-sulfate
meta_560	560	254.993	TRUE	0.717029	28314.8	-0.00179218	C6H9O9P	-H(-)	28	HMDB0062628	6-O-phosphonato-D-glucono-1,5-lactone(2-)	Organic oxygen compounds	Organooxygen compounds	Carbohydrates and carbohydrate conjugates	Aliphatic heteromonocyclic compounds	Hexose phosphates	NA	6-O-phosphonato-D-glucono-1,5-lactone(2-)
meta_561	561	255.066	TRUE	0.936525	45088.2	0.000276722	C15H12O4	-H(-)	100	HMDB0005760	Dihydrodaidzein	Phenylpropanoids and polyketides	Isoflavonoids	Isoflavans	Aromatic heteropolycyclic compounds	Isoflavanones	NA	Dihydrodaidzein
meta_562	562	255.074	TRUE	0.776418	87186.3	0.0010216	C11H14NO6	-H(-)	97	HMDB0006809	Nicotinate D-ribonucleoside	Organic oxygen compounds	Organooxygen compounds	Carbohydrates and carbohydrate conjugates	Aromatic heteromonocyclic compounds	Glycosylamines	NA	Nicotinate D-ribonucleoside
meta_563	563	257.077	TRUE	0.799127	25323.4	0.000888857	C10H14N2O6	-H(-)	100	HMDB0000884	Ribothymidine	Nucleosides, nucleotides, and analogues	Pyrimidine nucleosides	Not classified	Aromatic heteromonocyclic compounds	Pyrimidine nucleosides	yes	Ribothymidine
meta_564	564	257.103	TRUE	0.710816	15208.5	-0.000365225	C12H18O6	-H(-)	100	HMDB0032527	1,1'-(Tetrahydro-6a-hydroxy-2,3a,5-trimethylfuro[2,3-d]-1,3-dioxole-2,5-diyl)bis-ethanone	Organoheterocyclic compounds	Dioxolanes	1,3-dioxolanes	Aliphatic heteropolycyclic compounds	1,3-dioxolanes	NA	1,1'-(Tetrahydro-6a-hydroxy-2,3a,5-trimethylfuro[2,3-d]-1,3-dioxole-2,5-diyl)bis-ethanone
meta_565	565	257.175	TRUE	0.674521	24859.1	0.00102119	C14H26O4	-H(-)	97	HMDB0000872	Tetradecanedioic acid	Lipids and lipid-like molecules	Fatty Acyls	Fatty acids and conjugates	Aliphatic acyclic compounds	Long-chain fatty acids	yes	Tetradecanedioic acid
meta_566	566	257.211	TRUE	0.616659	10062	0.00107719	C15H30O3	-H(-)	88	HMDB0031061	10-Hydroxymyristic acid methyl ester	Lipids and lipid-like molecules	Fatty Acyls	Fatty alcohols	Aliphatic acyclic compounds	Fatty alcohols	NA	10-Hydroxymyristic acid methyl ester
meta_567	567	258.074	TRUE	0.757434	15920.6	-0.000624227	C9H13N3O6	-H(-)	100	HMDB0041934	Mizoribine	Nucleosides, nucleotides, and analogues	Imidazole ribonucleosides and ribonucleotides	1-ribosyl-imidazolecarboxamides	Aromatic heteromonocyclic compounds	1-ribosyl-imidazolecarboxamides	NA	Mizoribine
meta_568	568	258.17	TRUE	0.696357	7468.07	0.000678242	C13H25NO4	-H(-)	100	HMDB0000705	Hexanoylcarnitine	Lipids and lipid-like molecules	Fatty Acyls	Fatty acid esters	Aliphatic acyclic compounds	Acyl carnitines	yes	Hexanoylcarnitine
meta_569	569	259.028	TRUE	0.763151	31802.9	0.000656672	C10H12O6S	-H(-)	100	HMDB0135261	[2-hydroxy-6-methoxy-4-(prop-2-en-1-yl)phenyl]oxidanesulfonic acid	Organic acids and derivatives	Organic sulfuric acids and derivatives	Arylsulfates	Aromatic homomonocyclic compounds	Phenylsulfates	NA	[2-hydroxy-6-methoxy-4-(prop-2-en-1-yl)phenyl]oxidanesulfonic acid
meta_570	570	260.023	TRUE	0.791979	24665.5	0.000616237	C9H11NO6S	-H(-)	100	HMDB0062550	2-Methoxyacetaminophen sulfate	Organic acids and derivatives	Organic sulfuric acids and derivatives	Arylsulfates	Aromatic homomonocyclic compounds	Phenylsulfates	NA	2-Methoxyacetaminophen sulfate
meta_571	571	261.006	TRUE	0.804266	37529.2	0.00104993	C9H10O7S	-H(-)	92	HMDB0011719	Homovanillic acid sulfate	Organic acids and derivatives	Organic sulfuric acids and derivatives	Arylsulfates	Aromatic homomonocyclic compounds	Phenylsulfates	NA	Homovanillic acid sulfate
meta_572	572	261.041	TRUE	0.775328	97474.3	-0.000631397	C13H10O6	-H(-)	100	HMDB0032644	Maclurin	Benzenoids	Benzene and substituted derivatives	Benzophenones	Aromatic homomonocyclic compounds	Benzophenones	NA	Maclurin
meta_573	573	261.073	TRUE	0.805083	36198.3	-0.000166603	C9H14N2O7	-H(-)	100	HMDB0011164	L-beta-aspartyl-L-glutamic acid	Organic acids and derivatives	Peptidomimetics	Hybrid peptides	Aliphatic acyclic compounds	Hybrid peptides	NA	L-beta-aspartyl-L-glutamic acid
meta_574	574	261.108	TRUE	0.599117	14148.3	0.0010443	C10H18N2O6	-H(-)	93	HMDB0029437	Nopalinic acid	Organic acids and derivatives	Carboxylic acids and derivatives	Amino acids, peptides, and analogues	Aliphatic acyclic compounds	Glutamic acid and derivatives	NA	Nopalinic acid
meta_575	575	261.126	TRUE	0.640138	10378.9	-0.00131561	C14H18N2O3	-H(-)	60	HMDB0011177	Phenylalanylproline	Organic acids and derivatives	Carboxylic acids and derivatives	Amino acids, peptides, and analogues	Aromatic heteromonocyclic compounds	Dipeptides	NA	Phenylalanylproline
meta_576	576	261.185	TRUE	0.0953685	5599.45	0.00132031	C17H26O2	-H(-)	60	HMDB0032501	Santalyl acetate	Lipids and lipid-like molecules	Prenol lipids	Sesquiterpenoids	Aliphatic homopolycyclic compounds	Sesquiterpenoids	NA	Santalyl acetate
meta_577	577	261.221	TRUE	0.40347	8230.29	0.00159255	C18H30O	-H(-)	39	HMDB0034495	6,10,14-Trimethyl-5,9,13-pentadecatrien-2-one	Lipids and lipid-like molecules	Prenol lipids	Diterpenoids	Aliphatic acyclic compounds	Acyclic diterpenoids	NA	6,10,14-Trimethyl-5,9,13-pentadecatrien-2-one
meta_578	578	262.144	TRUE	-0.00454181	4376.73	0.00105318	C15H21NO3	-H(-)	92	HMDB0032305	N-(Heptan-4-yl)benzo[d][1,3]dioxole-5-carboxamide	Organoheterocyclic compounds	Benzodioxoles	Not classified	Aromatic heteropolycyclic compounds	Benzodioxoles	NA	N-(Heptan-4-yl)benzo[d][1,3]dioxole-5-carboxamide
meta_579	579	262.18	TRUE	0.562076	3401.56	0.000769592	C16H25NO2	-H(-)	100	HMDB0013892	N-Desmethylvenlafaxine	Benzenoids	Phenol ethers	Anisoles	Aromatic homomonocyclic compounds	Anisoles	NA	N-Desmethylvenlafaxine
meta_580	580	262.936	TRUE	0.527749	6917.18	0.000820141	C5H12O2S5	-H(-)	100	HMDB0039734	2,3,5,7,9-Pentathiadecane 2,2-dioxide	Organosulfur compounds	Sulfonyls	Sulfones	Aliphatic acyclic compounds	Sulfones	NA	2,3,5,7,9-Pentathiadecane 2,2-dioxide
meta_581	581	263.103	TRUE	0.824943	281917	0.000887508	C13H16N2O4	-H(-)	100	HMDB0004259	Acetyl-N-formyl-5-methoxykynurenamine	Organic oxygen compounds	Organooxygen compounds	Carbonyl compounds	Aromatic homomonocyclic compounds	Alkyl-phenylketones	NA	Acetyl-N-formyl-5-methoxykynurenamine
meta_582	582	263.129	TRUE	0.797514	26285.7	-8.23e-05	C15H20O4	-H(-)	100	HMDB0030102	Hulupinic acid	Organic acids and derivatives	Vinylogous acids	Not classified	Aliphatic homomonocyclic compounds	Vinylogous acids	NA	Hulupinic acid
meta_583	583	263.164	TRUE	0.324306	15414.5	0.000913803	C16H24O3	-H(-)	100	HMDB0032090	12-Oxo-2,3-dinor-10,15-phytodienoic acid	Lipids and lipid-like molecules	Fatty Acyls	Eicosanoids	Aliphatic homomonocyclic compounds	Prostaglandins and related compounds	NA	12-Oxo-2,3-dinor-10,15-phytodienoic acid
meta_584	584	263.201	TRUE	0.438923	7282.43	0.000884288	C17H28O2	-H(-)	100	HMDB0035910	Cedryl acetate	Lipids and lipid-like molecules	Prenol lipids	Sesquiterpenoids	Aliphatic homopolycyclic compounds	Cedrane and isocedrane sesquiterpenoids	NA	Cedryl acetate
meta_585	585	264.05	TRUE	0.64137	8118.25	0.000912011	C12H11NO6	-H(-)	100	HMDB0041949	Nitecapone	Phenylpropanoids and polyketides	Cinnamic acids and derivatives	Hydroxycinnamic acids and derivatives	Aromatic homomonocyclic compounds	Hydroxycinnamic acids and derivatives	NA	Nitecapone
meta_586	586	264.106	TRUE	0.784503	45294.4	-0.00080922	C12H17N4OS	-H(-)	100	HMDB0000235	Thiamine	Organoheterocyclic compounds	Diazines	Pyrimidines and pyrimidine derivatives	Aromatic heteromonocyclic compounds	Thiamines	yes	Thiamine
meta_587	587	265.107	TRUE	0.706473	35327.2	0.000983346	C14H18O5	-H(-)	100	HMDB0040891	3',4',5'-Trimethoxycinnamyl alcohol acetate	Benzenoids	Phenol ethers	Anisoles	Aromatic homomonocyclic compounds	Anisoles	NA	3',4',5'-Trimethoxycinnamyl alcohol acetate
meta_588	588	265.252	TRUE	0.511023	6678.69	0.00151292	C18H34O	-H(-)	44	HMDB0030965	9-Octadecenal	Lipids and lipid-like molecules	Fatty Acyls	Fatty aldehydes	Aliphatic acyclic compounds	Fatty aldehydes	NA	9-Octadecenal
meta_589	589	267.052	TRUE	0.831218	43338.3	-0.000835206	C12H12O7	-H(-)	100	HMDB0128678	3-(6,7-dimethoxy-2H-1,3-benzodioxol-5-yl)oxirane-2-carboxylic acid	Organoheterocyclic compounds	Benzodioxoles	Not classified	Aromatic heteropolycyclic compounds	Benzodioxoles	NA	3-(6,7-dimethoxy-2H-1,3-benzodioxol-5-yl)oxirane-2-carboxylic acid
meta_590	590	267.11	TRUE	0.83198	24504.6	0.000292523	C11H16N4O4	-H(-)	100	HMDB0012881	Acetylcarnosine	Organic acids and derivatives	Peptidomimetics	Hybrid peptides	Aromatic heteromonocyclic compounds	Hybrid peptides	yes	Acetylcarnosine
meta_591	591	267.123	TRUE	0.834509	78154	0.000932128	C14H20O5	-H(-)	100	HMDB0038935	Kamahine C	Organic oxygen compounds	Organooxygen compounds	Ethers	Aliphatic heteropolycyclic compounds	Ketals	NA	Kamahine C
meta_592	592	267.159	TRUE	0.663381	11810.4	0.00121225	C15H24O4	-H(-)	71	HMDB0036150	4,11,13,15-Tetrahydroridentin B	Lipids and lipid-like molecules	Prenol lipids	Terpene lactones	Aliphatic heteropolycyclic compounds	Eudesmanolides, secoeudesmanolides, and derivatives	NA	4,11,13,15-Tetrahydroridentin B
meta_593	593	267.232	TRUE	0.807576	101889	0.000913572	C17H32O2	-H(-)	100	HMDB0030997	Cyclohexaneundecanoic acid	Lipids and lipid-like molecules	Fatty Acyls	Fatty acids and conjugates	Aliphatic homomonocyclic compounds	Long-chain fatty acids	NA	Cyclohexaneundecanoic acid
meta_594	594	268.263	TRUE	0.787502	5377.15	0.00125592	C17H35NO	-H(-)	66	HMDB0040940	Capsiamide	Organic acids and derivatives	Carboxylic acids and derivatives	Carboxylic acid derivatives	Aliphatic acyclic compounds	Acetamides	NA	Capsiamide
meta_595	595	269.096	TRUE	0.941614	65320.1	0.000886732	C12H18N2O3S	-H(-)	100	HMDB0015256	Tolbutamide	Benzenoids	Benzene and substituted derivatives	Benzenesulfonamides	Aromatic homomonocyclic compounds	Benzenesulfonamides	NA	Tolbutamide
meta_596	596	269.213	TRUE	0.68398	48915	-0.000725566	C16H30O3	-H(-)	100	HMDB0010733	3-Oxohexadecanoic acid	Lipids and lipid-like molecules	Fatty Acyls	Fatty acids and conjugates	Aliphatic acyclic compounds	Long-chain fatty acids	NA	3-Oxohexadecanoic acid
meta_597	597	269.248	TRUE	0.799609	177889	0.000984646	C17H34O2	-H(-)	100	HMDB0002259	Heptadecanoic acid	Lipids and lipid-like molecules	Fatty Acyls	Fatty acids and conjugates	Aliphatic acyclic compounds	Long-chain fatty acids	yes	Heptadecanoic acid
meta_598	598	269.283	TRUE	0.770811	9267.7	0.0016756	C18H38O	-H(-)	34	HMDB0002350	Octadecanol	Lipids and lipid-like molecules	Fatty Acyls	Fatty alcohols	Aliphatic acyclic compounds	Long-chain fatty alcohols	NA	Octadecanol
meta_599	599	270.206	TRUE	0.572525	6595.16	0.00134232	C15H29NO3	-H(-)	58	HMDB0013317	Tridecanoylglycine	Organic acids and derivatives	Carboxylic acids and derivatives	Amino acids, peptides, and analogues	Aliphatic acyclic compounds	N-acyl-alpha amino acids	NA	Tridecanoylglycine
meta_600	600	270.991	TRUE	0.731614	11532.4	0.000514166	C10H8O7S	-H(-)	100	HMDB0128634	[(7-hydroxy-1-oxo-1H-isochromen-3-yl)methoxy]sulfonic acid	Phenylpropanoids and polyketides	Isocoumarins and derivatives	Not classified	Aromatic heteropolycyclic compounds	Isocoumarins and derivatives	NA	[(7-hydroxy-1-oxo-1H-isochromen-3-yl)methoxy]sulfonic acid
meta_601	601	271.027	TRUE	0.720907	31419.1	0.000692336	C11H12O6S	-H(-)	100	HMDB0059993	5-(Hydroxyphenyl)-gamma-valerolactone-O-sulphate	Organic acids and derivatives	Organic sulfuric acids and derivatives	Arylsulfates	Aromatic heteromonocyclic compounds	Phenylsulfates	NA	5-(Hydroxyphenyl)-gamma-valerolactone-O-sulphate
meta_602	602	271.206	TRUE	0.644592	6349.39	0.000972405	C19H28O	-H(-)	100	HMDB0006046	5a-Androst-3-en-17-one	Lipids and lipid-like molecules	Steroids and steroid derivatives	Androstane steroids	Aliphatic homopolycyclic compounds	Androstane steroids	NA	5a-Androst-3-en-17-one
meta_603	603	271.994	TRUE	0.611929	4988	-0.00055915	C6H10O10P	-H(-)	100	HMDB0062800	6-phosphonatooxy-D-gluconate	Organic oxygen compounds	Organooxygen compounds	Carbohydrates and carbohydrate conjugates	Aliphatic acyclic compounds	Monosaccharide phosphates	NA	6-phosphonatooxy-D-gluconate
meta_604	604	272.004	TRUE	0.672165	4112.87	0.00171544	C10H11NO4S2	-H(-)	32	HMDB0015492	Stepronin	Organic acids and derivatives	Carboxylic acids and derivatives	Amino acids, peptides, and analogues	Aromatic heteromonocyclic compounds	N-acyl-alpha amino acids	NA	Stepronin
meta_605	605	272.168	TRUE	0.602934	4427.11	-0.00227416	C17H23NO2	-H(-)	13	HMDB0030433	Linalyl anthranilate	Lipids and lipid-like molecules	Prenol lipids	Monoterpenoids	Aromatic homomonocyclic compounds	Aromatic monoterpenoids	NA	Linalyl anthranilate
meta_606	606	272.186	TRUE	0.641087	4137.06	0.000436882	C14H27NO4	-H(-)	100	HMDB0013238	Heptanoylcarnitine	Organic acids and derivatives	Hydroxy acids and derivatives	Beta hydroxy acids and derivatives	Aliphatic acyclic compounds	Beta hydroxy acids and derivatives	NA	Heptanoylcarnitine
meta_607	607	272.965	TRUE	0.678726	5280.38	0.00113068	C6H11O6PS2	-H(-)	81	HMDB0060636	Malathion dicarboxylic acid	Lipids and lipid-like molecules	Fatty Acyls	Fatty acids and conjugates	Aliphatic acyclic compounds	Thia fatty acids	NA	Malathion dicarboxylic acid
meta_608	608	273.133	TRUE	0.605942	13507.2	-0.00046119	C11H20N3O5	-H(-)	100	HMDB0028950	Lysyl-Glutamate	Organic acids and derivatives	Carboxylic acids and derivatives	Amino acids, peptides, and analogues	Aliphatic acyclic compounds	Dipeptides	NA	Lysyl-Glutamate
meta_609	609	274.141	TRUE	0.494624	13837.5	0.000294204	C11H21N3O5	-H(-)	100	HMDB0003869	Epsilon-(gamma-Glutamyl)-lysine	Organic acids and derivatives	Carboxylic acids and derivatives	Amino acids, peptides, and analogues	Aliphatic acyclic compounds	Glutamine and derivatives	yes	Epsilon-(gamma-Glutamyl)-lysine
meta_610	610	275.126	TRUE	0.518055	7007.67	-0.00136545	C11H20N2O6	-H(-)	56	HMDB0000279	Saccharopine	Organic acids and derivatives	Carboxylic acids and derivatives	Amino acids, peptides, and analogues	Aliphatic acyclic compounds	Glutamic acid and derivatives	NA	Saccharopine
meta_611	611	276.17	TRUE	0.158403	6813.66	0.00127846	C15H23N3O2	-H(-)	64	HMDB0041944	N-Acetylprocainamide	Benzenoids	Benzene and substituted derivatives	Benzoic acids and derivatives	Aromatic homomonocyclic compounds	Acylaminobenzoic acid and derivatives	NA	N-Acetylprocainamide
meta_612	612	278.066	TRUE	0.652675	11352.6	0.00065926	C13H13NO6	-H(-)	100	HMDB0029234	N-[4'-hydroxy-(E)-cinnamoyl]-L-aspartic acid	Organic acids and derivatives	Carboxylic acids and derivatives	Amino acids, peptides, and analogues	Aromatic homomonocyclic compounds	Aspartic acid and derivatives	NA	N-[4'-hydroxy-(E)-cinnamoyl]-L-aspartic acid
meta_613	613	278.123	TRUE	0.637059	10771	0.00177106	C11H21NO7	-H(-)	29	HMDB0037844	N-(1-Deoxy-1-fructosyl)valine	Organic acids and derivatives	Carboxylic acids and derivatives	Amino acids, peptides, and analogues	Aliphatic heteromonocyclic compounds	Valine and derivatives	NA	N-(1-Deoxy-1-fructosyl)valine
meta_614	614	279.123	TRUE	0.738194	18151	0.000666615	C15H20O5	-H(-)	100	HMDB0035620	Artabsinolide A	Organoheterocyclic compounds	Lactones	Gamma butyrolactones	Aliphatic heteropolycyclic compounds	Gamma butyrolactones	NA	Artabsinolide A
meta_615	615	279.188	TRUE	0.222726	23109.1	-0.00124696	C19H24N2	-H(-)	67	HMDB0001848	Imipramine	Organoheterocyclic compounds	Benzazepines	Dibenzazepines	Aromatic heteropolycyclic compounds	Dibenzazepines	NA	Imipramine
meta_616	616	279.232	TRUE	0.863626	5.05337e+06	0.000536213	C18H32O2	-H(-)	100	HMDB0000673	Linoleic acid	Lipids and lipid-like molecules	Fatty Acyls	Lineolic acids and derivatives	Aliphatic acyclic compounds	Lineolic acids and derivatives	yes	Linoleic acid
meta_617	617	280.208	TRUE	0.740257	19406	-0.000967417	C20H27N	-H(-)	100	HMDB0015554	Alverine	Benzenoids	Benzene and substituted derivatives	Phenylpropylamines	Aromatic homomonocyclic compounds	Phenylpropylamines	NA	Alverine
meta_618	618	281.176	TRUE	0.67111	29433.8	-0.000103679	C16H26O4	-H(-)	100	HMDB0033630	Lactapiperanol C	Lipids and lipid-like molecules	Prenol lipids	Diterpenoids	Aliphatic heteropolycyclic compounds	Diterpenoids	NA	Lactapiperanol C
meta_619	619	282.098	TRUE	0.935334	28089.1	-0.000868846	C11H15N4O5	-H(-)	100	HMDB0003950	7-Methylinosine	Nucleosides, nucleotides, and analogues	Purine nucleosides	Not classified	Aromatic heteropolycyclic compounds	Purine nucleosides	NA	7-Methylinosine
meta_620	620	283.069	TRUE	0.798313	18962.5	-0.000902931	C10H12N4O6	-H(-)	100	HMDB0000299	Xanthosine	Nucleosides, nucleotides, and analogues	Purine nucleosides	Not classified	Aromatic heteropolycyclic compounds	Purine nucleosides	NA	Xanthosine
meta_621	621	283.154	TRUE	0.731257	21815	0.000733251	C15H24O5	-H(-)	100	HMDB0060593	Alpha-dihydroartemisinin	Lipids and lipid-like molecules	Prenol lipids	Sesquiterpenoids	Aliphatic heteropolycyclic compounds	Artemisinins	NA	Alpha-dihydroartemisinin
meta_622	622	283.205	TRUE	0.778873	22220.2	0.00161888	C20H28O	-H(-)	37	HMDB0001358	Retinal	Lipids and lipid-like molecules	Prenol lipids	Retinoids	Aliphatic homomonocyclic compounds	Retinoids	NA	Retinal
meta_623	623	283.228	TRUE	0.667935	33501.8	3.1e-05	C17H32O3	-H(-)	100	HMDB0035473	Avocadyne	Lipids and lipid-like molecules	Fatty Acyls	Fatty alcohols	Aliphatic acyclic compounds	Long-chain fatty alcohols	NA	Avocadyne
meta_624	624	284.224	TRUE	0.74518	17316.2	-0.000657614	C16H31NO3	-H(-)	100	HMDB0013250	Myristoylglycine	Organic acids and derivatives	Carboxylic acids and derivatives	Amino acids, peptides, and analogues	Aliphatic acyclic compounds	N-acyl-alpha amino acids	NA	Myristoylglycine
meta_625	625	285.041	TRUE	0.564269	99130.3	-0.00043449	C15H10O6	-H(-)	62	HMDB0005800	Luteolin	Phenylpropanoids and polyketides	Flavonoids	Flavones	Aromatic heteropolycyclic compounds	Flavones	NA	Luteolin
meta_626	626	285.206	TRUE	0.667171	21265.6	0.00098716	C16H30O4	-H(-)	100	HMDB0000672	Hexadecanedioic acid	Lipids and lipid-like molecules	Fatty Acyls	Fatty acids and conjugates	Aliphatic acyclic compounds	Long-chain fatty acids	yes	Hexadecanedioic acid
meta_627	627	285.243	TRUE	0.712429	13592.3	0.000247893	C17H34O3	-H(-)	100	HMDB0031042	Avocadene	Lipids and lipid-like molecules	Fatty Acyls	Fatty alcohols	Aliphatic acyclic compounds	Long-chain fatty alcohols	NA	Avocadene
meta_628	628	286.188	TRUE	0.674604	7912.49	0.000855526	C12H25N5O3	-H(-)	100	HMDB0028712	Arginyl-Isoleucine	Organic acids and derivatives	Carboxylic acids and derivatives	Amino acids, peptides, and analogues	Aliphatic acyclic compounds	Dipeptides	NA	Arginyl-Isoleucine
meta_629	629	287.023	TRUE	0.81968	77404	0.000555109	C11H12O7S	-H(-)	100	HMDB0029191	5'-(3',4'-Dihydroxyphenyl)-gamma-valerolactone sulfate	Organic acids and derivatives	Organic sulfuric acids and derivatives	Arylsulfates	Aromatic heteromonocyclic compounds	Phenylsulfates	NA	5'-(3',4'-Dihydroxyphenyl)-gamma-valerolactone sulfate
meta_630	630	287.2	TRUE	0.666422	9207.81	0.00129753	C19H28O2	-H(-)	62	HMDB0000077	Dehydroepiandrosterone	Lipids and lipid-like molecules	Steroids and steroid derivatives	Androstane steroids	Aliphatic homopolycyclic compounds	Androgens and derivatives	NA	Dehydroepiandrosterone
meta_631	631	288.023	TRUE	0.755626	16504.6	-0.00152566	C10H12ClN3O3S	-H(-)	11	HMDB0015420	Quinethazone	Organoheterocyclic compounds	Diazanaphthalenes	Benzodiazines	Aromatic heteropolycyclic compounds	Quinazolines	NA	Quinethazone
meta_632	632	288.12	TRUE	0.548765	14973.2	1.32e-05	C11H19N3O6	-H(-)	100	HMDB0005765	Ophthalmic acid	Organic acids and derivatives	Carboxylic acids and derivatives	Amino acids, peptides, and analogues	Aliphatic acyclic compounds	Oligopeptides	NA	Ophthalmic acid
meta_633	633	289.039	TRUE	0.791585	53226.9	1.76e-05	C11H14O7S	-H(-)	100	HMDB0059975	4-Hydroxy-5-(3'-hydroxyphenyl)-valeric acid-3'-O-sulphate	Lipids and lipid-like molecules	Fatty Acyls	Fatty acids and conjugates	Aromatic homomonocyclic compounds	Sulfated fatty acids	NA	4-Hydroxy-5-(3'-hydroxyphenyl)-valeric acid-3'-O-sulphate
meta_634	634	289.09	TRUE	0.63015	8636.06	0.00239163	C12H18O8	-H(-)	11	HMDB0031304	Osmundalin	Organooxygen compounds	Carbohydrates and carbohydrate conjugates	Glycosyl compounds	Aliphatic heteromonocyclic compounds	O-glycosyl compounds	NA	Osmundalin
meta_635	635	289.123	TRUE	0.67357	11233.7	0.000123091	C20H18O2	-H(-)	100	HMDB0040916	2-(4-Methyl-3-pentenyl)anthraquinone	Benzenoids	Anthracenes	Anthraquinones	Aromatic homopolycyclic compounds	Anthraquinones	NA	2-(4-Methyl-3-pentenyl)anthraquinone
meta_636	636	289.143	TRUE	0.549429	8615.11	0.0017244	C17H22O4	-H(-)	31	HMDB0029474	[6]-Dehydrogingerdione	Phenylpropanoids and polyketides	Cinnamic acids and derivatives	Hydroxycinnamic acids and derivatives	Aromatic homomonocyclic compounds	Hydroxycinnamic acids and derivatives	NA	[6]-Dehydrogingerdione
meta_637	637	289.155	TRUE	0.613224	6928.37	0.000386078	C16H22N2O3	-H(-)	100	HMDB0015453	Procaterol	Organoheterocyclic compounds	Quinolines and derivatives	Quinolones and derivatives	Aromatic heteropolycyclic compounds	Hydroquinolones	NA	Procaterol
meta_638	638	289.164	TRUE	0.602961	7908.19	0.00136904	C14H26O6	-H(-)	55	HMDB0032959	1-Octen-3-yl glucoside	Lipids and lipid-like molecules	Fatty Acyls	Fatty acyl glycosides	Aliphatic heteromonocyclic compounds	Fatty acyl glycosides of mono- and disaccharides	NA	1-Octen-3-yl glucoside
meta_639	639	289.18	TRUE	0.516934	13978.9	0.00101738	C18H26O3	-H(-)	97	HMDB0031098	(9Z,11E,13E,15Z)-4-Oxo-9,11,13,15-octadecatetraenoic acid	Lipids and lipid-like molecules	Fatty Acyls	Lineolic acids and derivatives	Aliphatic acyclic compounds	Lineolic acids and derivatives	NA	(9Z,11E,13E,15Z)-4-Oxo-9,11,13,15-octadecatetraenoic acid
meta_640	640	289.253	TRUE	0.335099	37169.5	0.000701029	C20H34O	-H(-)	100	HMDB0035083	(3S,6E,10E)-1,6,10,14-Phytatetraen-3-ol	Lipids and lipid-like molecules	Prenol lipids	Diterpenoids	Aliphatic acyclic compounds	Acyclic diterpenoids	NA	(3S,6E,10E)-1,6,10,14-Phytatetraen-3-ol
meta_641	641	291.058	TRUE	0.800023	307757	-0.000981453	C10H17N2O4PS	-H(-)	100	HMDB0031783	Etrimfos	Organic acids and derivatives	Organic thiophosphoric acids and derivatives	Thiophosphoric acid esters	Aromatic heteromonocyclic compounds	Pyrimidinyl phosphorothioates	NA	Etrimfos
meta_642	642	291.083	TRUE	0.406917	1.14593e+07	0.000728155	C10H16N2O8	-H(-)	100	HMDB0015109	Edetic Acid	Organic acids and derivatives	Carboxylic acids and derivatives	Tetracarboxylic acids and derivatives	Aliphatic acyclic compounds	Tetracarboxylic acids and derivatives	NA	Edetic Acid
meta_643	643	293.248	TRUE	0.584076	16897.5	0.00108373	C19H34O2	-H(-)	87	HMDB0034381	Methyl linoleate	Lipids and lipid-like molecules	Fatty Acyls	Lineolic acids and derivatives	Aliphatic acyclic compounds	Lineolic acids and derivatives	NA	Methyl linoleate
meta_644	644	293.941	TRUE	0.737578	7060.42	0.000405929	C7H6ClN3O4S2	-H(-)	25	HMDB0015018	Chlorothiazide	Organoheterocyclic compounds	Thiadiazines	Benzothiadiazines	Aromatic heteropolycyclic compounds	1,2,4-benzothiadiazine-1,1-dioxides	NA	Chlorothiazide
meta_645	645	294.088	TRUE	0.375178	40842.3	0.000331528	C16H13N3O3	-H(-)	100	HMDB0014781	Mebendazole	Benzenoids	Benzene and substituted derivatives	Benzophenones	Aromatic heteropolycyclic compounds	Benzophenones	NA	Mebendazole
meta_646	646	295.118	TRUE	0.706928	14181.1	0.000466631	C15H20O6	-H(-)	100	HMDB0036156	Deoxynivalenol	Lipids and lipid-like molecules	Prenol lipids	Sesquiterpenoids	Aliphatic heteropolycyclic compounds	Trichothecenes	NA	Deoxynivalenol
meta_647	647	295.227	TRUE	0.768692	62936.2	0.00116328	C18H32O3	-H(-)	77	HMDB0004667	13S-hydroxyoctadecadienoic acid	Lipids and lipid-like molecules	Fatty Acyls	Lineolic acids and derivatives	Aliphatic acyclic compounds	Lineolic acids and derivatives	NA	13S-hydroxyoctadecadienoic acid
meta_648	648	295.957	TRUE	0.827045	6272.66	0.000365533	C7H8ClN3O4S2	-H(-)	25	HMDB0001928	Hydrochlorothiazide	Organoheterocyclic compounds	Thiadiazines	Benzothiadiazines	Aromatic heteropolycyclic compounds	1,2,4-benzothiadiazine-1,1-dioxides	yes	Hydrochlorothiazide
meta_649	649	296.037	TRUE	0.463433	26350.7	0.000601478	C8H15N3O5S2	-H(-)	100	HMDB0000709	L-Cysteinylglycine disulfide	Organic acids and derivatives	Carboxylic acids and derivatives	Amino acids, peptides, and analogues	Aliphatic acyclic compounds	Dipeptides	yes	L-Cysteinylglycine disulfide
meta_650	650	296.086	TRUE	0.739633	15212.8	0.000726438	C16H15N3OS	-H(-)	100	HMDB0032367	L-Menthone 1,2-glycerol ketal	Lipids and lipid-like molecules	Prenol lipids	Monoterpenoids	Not classified	Menthane monoterpenoids	NA	L-Menthone 1,2-glycerol ketal
meta_651	651	297.077	TRUE	0.745095	17129.3	-0.000551027	C17H14O5	-H(-)	100	HMDB0029512	4',5-Dihydroxy-7-methoxy-6-methylflavone	Phenylpropanoids and polyketides	Flavonoids	O-methylated flavonoids	Aromatic heteropolycyclic compounds	7-O-methylated flavonoids	NA	4',5-Dihydroxy-7-methoxy-6-methylflavone
meta_652	652	297.133	TRUE	0.74823	12282.3	0.00149785	C15H22O6	-H(-)	45	HMDB0036159	Toxin T2 tetrol	Lipids and lipid-like molecules	Prenol lipids	Sesquiterpenoids	Aliphatic heteropolycyclic compounds	Trichothecenes	NA	Toxin T2 tetrol
meta_653	653	297.169	TRUE	0.379638	16338.6	0.0017553	C16H26O5	-H(-)	30	HMDB0015643	Artemether	Lipids and lipid-like molecules	Prenol lipids	Sesquiterpenoids	Aliphatic heteropolycyclic compounds	Artemisinins	NA	Artemether
meta_654	654	297.182	TRUE	0.830615	9744.73	-0.000904031	C13H24N5O3	-H(-)	100	HMDB0060473	Diphthamide	Organic acids and derivatives	Carboxylic acids and derivatives	Amino acids, peptides, and analogues	Aromatic heteromonocyclic compounds	Histidine and derivatives	NA	Diphthamide
meta_655	655	297.242	TRUE	0.804153	165143	0.00123828	C18H34O3	-H(-)	68	HMDB0010736	3-Oxooctadecanoic acid	Lipids and lipid-like molecules	Fatty Acyls	Fatty acids and conjugates	Aliphatic acyclic compounds	Long-chain fatty acids	NA	3-Oxooctadecanoic acid
meta_656	656	298.071	TRUE	0.680321	8722.22	-0.000970457	C9H18NO8P	-H(-)	100	HMDB0001016	D-4'-Phosphopantothenate	Organic acids and derivatives	Carboxylic acids and derivatives	Amino acids, peptides, and analogues	Aliphatic acyclic compounds	Beta amino acids and derivatives	NA	D-4'-Phosphopantothenate
meta_657	657	298.086	TRUE	0.694472	6940.24	0.00071481	C12H17N3O4S	-H(-)	100	HMDB0015536	Imipenem	Organoheterocyclic compounds	Lactams	Beta lactams	Aliphatic heteropolycyclic compounds	Thienamycins	NA	Imipenem
meta_658	658	298.094	TRUE	0.690047	6502.16	-0.000888385	C13H17NO7	-H(-)	100	HMDB0041517	beta-D-Glucopyranosyl anthranilate	Organic oxygen compounds	Organooxygen compounds	Carbohydrates and carbohydrate conjugates	Aromatic heteromonocyclic compounds	Hexoses	NA	beta-D-Glucopyranosyl anthranilate
meta_659	659	298.165	TRUE	0.57695	9683.63	-0.000303642	C13H23N4O4	-H(-)	100	HMDB0059617	2-(3-carboxy-3-(trimethylammonio)propyl)-L-histidine	Organic acids and derivatives	Carboxylic acids and derivatives	Amino acids, peptides, and analogues	Aromatic heteromonocyclic compounds	Histidine and derivatives	NA	2-(3-carboxy-3-(trimethylammonio)propyl)-L-histidine
meta_660	660	298.277	TRUE	0.0560049	13089.8	-0.0019945	C18H37NO2	-H(-)	20	HMDB0000252	Sphingosine	Organic nitrogen compounds	Organonitrogen compounds	Amines	Aliphatic acyclic compounds	1,2-aminoalcohols	yes	Sphingosine
meta_661	661	299.07	TRUE	0.785377	14567.3	0.000775192	C12H16N2O5S	-H(-)	100	HMDB0041849	Carboxytolbutamide	Benzenoids	Benzene and substituted derivatives	Benzenesulfonamides	Aromatic homomonocyclic compounds	Benzenesulfonamides	NA	Carboxytolbutamide
meta_662	662	299.236	TRUE	0.780655	7767.93	0.00181567	C21H32O	-H(-)	27	HMDB0015500	Allylestrenol	Lipids and lipid-like molecules	Steroids and steroid derivatives	Estrane steroids	Aliphatic homopolycyclic compounds	Estrane steroids	NA	Allylestrenol
meta_663	663	300.039	TRUE	0.859553	32423.5	0.000806421	C8H15NO9S	-H(-)	100	HMDB0000781	N-Acetylgalactosamine 4-sulphate	Organic oxygen compounds	Organooxygen compounds	Carbohydrates and carbohydrate conjugates	Aliphatic heteromonocyclic compounds	Acylaminosugars	NA	N-Acetylgalactosamine 4-sulphate
meta_664	664	301.129	TRUE	0.737486	14961.8	0.000698367	C14H22O7	-H(-)	100	HMDB0040462	Garcinia lactone dibutyl ester	Organic acids and derivatives	Carboxylic acids and derivatives	Tricarboxylic acids and derivatives	Aliphatic heteromonocyclic compounds	Tricarboxylic acids and derivatives	NA	Garcinia lactone dibutyl ester
meta_665	665	301.252	TRUE	0.528236	10172	0.00177466	C21H34O	-H(-)	29	HMDB0030482	Cardanolmonoene	Benzenoids	Phenols	1-hydroxy-4-unsubstituted benzenoids	Aromatic homomonocyclic compounds	1-hydroxy-4-unsubstituted benzenoids	NA	Cardanolmonoene
meta_666	666	302.115	TRUE	0.725305	13772.6	-0.000420225	C15H17N3O4	-H(-)	100	HMDB0013240	Indoleacetyl glutamine	Organic acids and derivatives	Carboxylic acids and derivatives	Amino acids, peptides, and analogues	Aromatic heteropolycyclic compounds	Glutamine and derivatives	yes	Indoleacetyl glutamine
meta_667	667	304.083	TRUE	0.56276	5678.49	-0.00078252	C15H15NO6	-H(-)	100	HMDB0029839	Ascorbigen	Organoheterocyclic compounds	Furofurans	Isosorbides	Aromatic heteropolycyclic compounds	Isosorbides	NA	Ascorbigen
meta_668	668	304.151	TRUE	0.57647	7833.77	0.000657039	C12H23N3O6	-H(-)	100	HMDB0039161	Syndesine	Organic acids and derivatives	Carboxylic acids and derivatives	Amino acids, peptides, and analogues	Aliphatic acyclic compounds	Alpha amino acids	NA	Syndesine
meta_669	669	304.192	TRUE	0.749401	4522.88	1.52e-05	C18H27NO3	-H(-)	100	HMDB0002227	Capsaicin	Benzenoids	Phenols	Methoxyphenols	Aromatic homomonocyclic compounds	Methoxyphenols	NA	Capsaicin
meta_670	670	305.175	TRUE	0.566734	10685	0.00124122	C18H26O4	-H(-)	68	HMDB0012799	5'-Carboxy-gamma-chromanol	Not classified	Not classified	Not classified	Not classified	Not classified	NA	5'-Carboxy-gamma-chromanol
meta_671	671	305.963	TRUE	0.757064	8193.77	-0.000231347	C9H10INO3	-H(-)	25	HMDB0000021	Iodotyrosine	Organic acids and derivatives	Carboxylic acids and derivatives	Amino acids, peptides, and analogues	Aromatic homomonocyclic compounds	Tyrosine and derivatives	NA	Iodotyrosine
meta_672	672	306.169	TRUE	0.682969	4221.4	0.00172538	C17H25NO4	-H(-)	31	HMDB0041906	Ibopamine	Benzenoids	Phenol esters	Not classified	Aromatic homomonocyclic compounds	Phenol esters	NA	Ibopamine
meta_673	673	307.17	TRUE	0.527396	5791.83	7.74e-05	C21H24O2	-H(-)	100	HMDB0002720	Gestrinone	Lipids and lipid-like molecules	Steroids and steroid derivatives	Estrane steroids	Aliphatic homopolycyclic compounds	Estrogens and derivatives	NA	Gestrinone
meta_674	674	307.191	TRUE	0.720866	18771.5	0.000235829	C18H28O4	-H(-)	100	HMDB0029852	Methylgingerol	Benzenoids	Benzene and substituted derivatives	Methoxybenzenes	Aromatic homomonocyclic compounds	Dimethoxybenzenes	NA	Methylgingerol
meta_675	675	307.226	TRUE	0.631879	7890.19	0.00225884	C19H32O3	-H(-)	13	HMDB0030960	Obtusilactone A	Organoheterocyclic compounds	Tetrahydrofurans	Not classified	Aliphatic heteromonocyclic compounds	Tetrahydrofurans	NA	Obtusilactone A
meta_676	676	308.012	TRUE	0.625279	4734.68	-0.000523825	C8H12N3O6PS	-H(-)	100	HMDB0060641	Lamivudine-monophosphate	Nucleosides, nucleotides, and analogues	Nucleoside and nucleotide analogues	Not classified	Aromatic heteromonocyclic compounds	Nucleoside and nucleotide analogues	NA	Lamivudine-monophosphate
meta_677	677	308.16	TRUE	0.371507	7322.8	0.00179025	C15H23N3O4	-H(-)	28	HMDB0028963	Lysyl-Tyrosine	Organic acids and derivatives	Carboxylic acids and derivatives	Amino acids, peptides, and analogues	Aromatic homomonocyclic compounds	Dipeptides	NA	Lysyl-Tyrosine
meta_678	678	309.04	TRUE	-0.134665	57704.8	0.000852317	C17H10O6	-H(-)	100	HMDB0033657	De-O-methylsterigmatocystin	Phenylpropanoids and polyketides	Sterigmatocystins	Not classified	Aromatic heteropolycyclic compounds	Sterigmatocystins	NA	De-O-methylsterigmatocystin
meta_679	679	309.098	TRUE	0.725557	18268.9	-0.000475269	C15H18O7	-H(-)	100	HMDB0030293	(E)-1-O-Cinnamoyl-beta-D-glucose	Phenylpropanoids and polyketides	Cinnamic acids and derivatives	Cinnamic acid esters	Aromatic heteromonocyclic compounds	O-cinnamoyl glycosides	NA	(E)-1-O-Cinnamoyl-beta-D-glucose
meta_680	680	311.141	TRUE	0.743492	22560.9	-0.000772616	C18H20N2O3	-H(-)	100	HMDB0013302	Phenylalanylphenylalanine	Organic acids and derivatives	Carboxylic acids and derivatives	Amino acids, peptides, and analogues	Aromatic homomonocyclic compounds	Dipeptides	NA	Phenylalanylphenylalanine
meta_681	681	311.2	TRUE	0.873839	22085.5	0.00150724	C21H28O2	-H(-)	44	HMDB0000995	16-Dehydroprogesterone	Lipids and lipid-like molecules	Steroids and steroid derivatives	Oxosteroids	Aliphatic homopolycyclic compounds	20-oxosteroids	NA	16-Dehydroprogesterone
meta_682	682	312.253	TRUE	0.728597	12263.2	0.000983083	C18H35NO3	-H(-)	100	HMDB0013034	Palmitoylglycine	Organic acids and derivatives	Carboxylic acids and derivatives	Amino acids, peptides, and analogues	Aliphatic acyclic compounds	N-acyl-alpha amino acids	yes	Palmitoylglycine
meta_683	683	313.065	TRUE	0.674721	4.69366e+06	0.00066411	C16H14N2O3S	-H(-)	44	HMDB0005033	Valdecoxib	Benzenoids	Benzene and substituted derivatives	Benzenesulfonamides	Aromatic heteromonocyclic compounds	Benzenesulfonamides	NA	Valdecoxib
meta_684	684	313.076	TRUE	0.561244	1.40201e+06	0.000140922	C15H14N4O2S	-H(-)	86	HMDB0015667	Sulfaphenazole	Organoheterocyclic compounds	Azoles	Pyrazoles	Aromatic heteromonocyclic compounds	Phenylpyrazoles	NA	Sulfaphenazole
meta_685	685	314.067	TRUE	0.663242	590295	-0.000407143	C16H13NO6	-H(-)	100	HMDB0038576	Avenanthramide C	Phenylpropanoids and polyketides	Cinnamic acids and derivatives	Hydroxycinnamic acids and derivatives	Aromatic homomonocyclic compounds	Avenanthramides	NA	Avenanthramide C
meta_686	686	315.05	TRUE	0.30526	179505	0.00055355	C16H12O7	-H(-)	100	HMDB0002655	Isorhamnetin	Phenylpropanoids and polyketides	Flavonoids	Flavones	Aromatic heteropolycyclic compounds	Flavonols	NA	Isorhamnetin
meta_687	687	315.127	TRUE	0.799348	20155.9	0.00043586	C18H21ClN2O	-H(-)	25	HMDB0060803	8-Hydroxydesmethylclomipramine	Organoheterocyclic compounds	Benzazepines	Dibenzazepines	Aromatic heteropolycyclic compounds	Dibenzazepines	NA	8-Hydroxydesmethylclomipramine
meta_688	688	315.159	TRUE	0.625733	14753	0.000946859	C19H24O4	-H(-)	100	HMDB0029566	Isopulegone caffeate	Phenylpropanoids and polyketides	Cinnamic acids and derivatives	Hydroxycinnamic acids and derivatives	Aromatic homomonocyclic compounds	Coumaric acids and derivatives	NA	Isopulegone caffeate
meta_689	689	315.197	TRUE	0.602988	29260.1	-0.00090916	C20H28O3	-H(-)	100	HMDB0000344	2-Methoxyestradiol-3-methylether	Lipids and lipid-like molecules	Steroids and steroid derivatives	Estrane steroids	Aromatic homopolycyclic compounds	Estrane steroids	NA	2-Methoxyestradiol-3-methylether
meta_690	690	316.212	TRUE	0.65564	6488.13	0.00129327	C16H31NO5	-H(-)	62	HMDB0061635	3-hydroxynonanoyl carnitine	Lipids and lipid-like molecules	Fatty Acyls	Fatty acid esters	Aliphatic acyclic compounds	Acyl carnitines	NA	3-hydroxynonanoyl carnitine
meta_691	691	319.227	TRUE	0.689565	22347.9	0.00126366	C20H32O3	-H(-)	65	HMDB0002190	5,6-Epoxy-8,11,14-eicosatrienoic acid	Lipids and lipid-like molecules	Fatty Acyls	Fatty acids and conjugates	Aliphatic heteromonocyclic compounds	Epoxy fatty acids	NA	5,6-Epoxy-8,11,14-eicosatrienoic acid
meta_692	692	320.084	TRUE	0.765631	6184.21	0.000584683	C9H15N5O8	-H(-)	100	HMDB0012143	2-Amino-4-oxo-4-alpha-hydroxy-6-(erythro-1',2',3'-trihydroxypropyl)-5,6,7,8-tetrahydroxypterin	Organoheterocyclic compounds	Pteridines and derivatives	Pterins and derivatives	Aromatic heteropolycyclic compounds	Biopterins and derivatives	NA	2-Amino-4-oxo-4-alpha-hydroxy-6-(erythro-1',2',3'-trihydroxypropyl)-5,6,7,8-tetrahydroxypterin
meta_693	693	320.145	TRUE	0.586733	4566.45	-0.000842658	C16H23N3O2S	-H(-)	100	HMDB0061011	N-desmethylalmotriptan	Organoheterocyclic compounds	Indoles and derivatives	Tryptamines and derivatives	Aromatic heteropolycyclic compounds	Tryptamines and derivatives	NA	N-desmethylalmotriptan
meta_694	694	322.274	TRUE	0.610741	5084.75	0.000844906	C20H37NO2	-H(-)	100	HMDB0012252	Linoleoyl ethanolamide	Organic nitrogen compounds	Organonitrogen compounds	Amines	Aliphatic acyclic compounds	N-acylethanolamines	yes	Linoleoyl ethanolamide
meta_695	695	323.166	TRUE	0.664023	9181.69	-0.000871595	C21H24O3	-H(-)	100	HMDB0060359	2,3-Epoxymenaquinone	Lipids and lipid-like molecules	Prenol lipids	Quinone and hydroquinone lipids	Aromatic heteropolycyclic compounds	Menaquinones	NA	2,3-Epoxymenaquinone
meta_696	696	324.289	TRUE	0.629886	6050.23	0.00138235	C20H39NO2	-H(-)	54	HMDB0002088	N-Oleoylethanolamine	Organic nitrogen compounds	Organonitrogen compounds	Amines	Aliphatic acyclic compounds	N-acylethanolamines	yes	N-Oleoylethanolamine
meta_697	697	325.035	TRUE	0.278289	22216.9	0.000778091	C17H10O7	-H(-)	100	HMDB0128433	13,14-dihydroxy-9-oxo-8,17-dioxatetracyclo[8.7.0.0虏,樊0鹿鹿,鹿遁heptadeca-1(10),2(7),3,5,11(16),12,14-heptaen-5-yl acetate	Phenylpropanoids and polyketides	Isoflavonoids	Coumestans	Aromatic heteropolycyclic compounds	Coumestans	NA	13,14-dihydroxy-9-oxo-8,17-dioxatetracyclo[8.7.0.0虏,樊0鹿鹿,鹿遁heptadeca-1(10),2(7),3,5,11(16),12,14-heptaen-5-yl acetate
meta_698	698	325.107	TRUE	0.707672	8190.58	0.00103944	C19H18O5	-H(-)	94	HMDB0030605	1,5-Dihydroxy-3-methoxy-2-prenylxanthone	Organoheterocyclic compounds	Benzopyrans	1-benzopyrans	Aromatic heteropolycyclic compounds	2-prenylated xanthones	NA	1,5-Dihydroxy-3-methoxy-2-prenylxanthone
meta_699	699	325.144	TRUE	0.710804	8260.37	0.000516189	C20H22O4	-H(-)	100	HMDB0031534	(+)-Galeon	Phenylpropanoids and polyketides	Diarylheptanoids	Cyclic diarylheptanoids	Aromatic heteropolycyclic compounds	Meta,para-diphenylether diarylheptanoids	NA	(+)-Galeon
meta_700	700	326.306	TRUE	0.482219	4647.65	0.000139052	C20H41NO2	-H(-)	100	HMDB0013078	Stearoylethanolamide	Organic nitrogen compounds	Organonitrogen compounds	Amines	Aliphatic acyclic compounds	N-acylethanolamines	NA	Stearoylethanolamide
meta_701	701	328.213	TRUE	0.654122	8557.21	0.000430077	C17H31NO5	-H(-)	100	HMDB0013202	6-Keto-decanoylcarnitine	Organic acids and derivatives	Hydroxy acids and derivatives	Beta hydroxy acids and derivatives	Aliphatic acyclic compounds	Beta hydroxy acids and derivatives	NA	6-Keto-decanoylcarnitine
meta_702	702	329	TRUE	0.764738	29002.4	0.000741327	C12H11ClN2O5S	-H(-)	25	HMDB0001933	Furosemide	Benzenoids	Benzene and substituted derivatives	Benzenesulfonamides	Aromatic heteromonocyclic compounds	Aminobenzenesulfonamides	NA	Furosemide
meta_703	703	329.032	TRUE	0.318687	3.74472e+06	-0.00138101	C16H10O8	-H(-)	37	HMDB0030643	Blighinone	Benzenoids	Phenanthrenes and derivatives	Hydrophenanthrenes	Aromatic homopolycyclic compounds	Hydrophenanthrenes	NA	Blighinone
meta_704	704	329.208	TRUE	0.664823	20653.9	-0.00208699	C12H26N8O3	-H(-)	17	HMDB0028703	Arginyl-Arginine	Organic acids and derivatives	Carboxylic acids and derivatives	Amino acids, peptides, and analogues	Aliphatic acyclic compounds	Dipeptides	NA	Arginyl-Arginine
meta_705	705	331.175	TRUE	0.813835	38530.7	0.000973155	C16H28O7	-H(-)	100	HMDB0029784	Unshuoside A	Lipids and lipid-like molecules	Prenol lipids	Terpene glycosides	Aliphatic heteromonocyclic compounds	Terpene glycosides	NA	Unshuoside A
meta_706	706	331.226	TRUE	0.753897	12387.5	0.00160289	C21H32O3	-H(-)	38	HMDB0000315	16-a-Hydroxypregnenolone	Lipids and lipid-like molecules	Steroids and steroid derivatives	Pregnane steroids	Aliphatic homopolycyclic compounds	Gluco/mineralocorticoids, progestogins and derivatives	NA	16-a-Hydroxypregnenolone
meta_707	707	332.012	TRUE	0.973691	7138.21	-1.7e-05	C8H15NO9S2	-H(-)	100	HMDB0038429	Methyl glucosinolate	Organooxygen compounds	Carbohydrates and carbohydrate conjugates	Monosaccharides	Aliphatic heteromonocyclic compounds	Alkylglucosinolates	NA	Methyl glucosinolate
meta_708	708	332.298	TRUE	0.7132	4513.42	-0.00232822	C22H39NO	-H(-)	12	HMDB0032033	2,4,12-Octadecatrienoic acid isobutylamide	Lipids and lipid-like molecules	Fatty Acyls	Fatty amides	Aliphatic acyclic compounds	N-acyl amines	NA	2,4,12-Octadecatrienoic acid isobutylamide
meta_709	709	334.161	TRUE	0.501031	7692.48	-0.0014356	C17H25N3O2S	-H(-)	50	HMDB0015054	Almotriptan	Organoheterocyclic compounds	Indoles and derivatives	Tryptamines and derivatives	Aromatic heteropolycyclic compounds	Tryptamines and derivatives	NA	Almotriptan
meta_710	710	334.31	TRUE	0.648656	5104.79	0.00140641	C22H41NO	-H(-)	52	HMDB0031678	Pipericine	Lipids and lipid-like molecules	Fatty Acyls	Fatty amides	Aliphatic acyclic compounds	N-acyl amines	NA	Pipericine
meta_711	711	335.199	TRUE	0.821963	16934.6	-0.00129634	C18H28N2O4	-H(-)	62	HMDB0015324	Acebutolol	Organic oxygen compounds	Organooxygen compounds	Carbonyl compounds	Aromatic homomonocyclic compounds	Alkyl-phenylketones	NA	Acebutolol
meta_712	712	335.257	TRUE	0.837585	16901.7	0.00212494	C21H36O3	-H(-)	16	HMDB0006070	Pregnanetriol	Lipids and lipid-like molecules	Steroids and steroid derivatives	Pregnane steroids	Aliphatic homopolycyclic compounds	Gluco/mineralocorticoids, progestogins and derivatives	NA	Pregnanetriol
meta_713	713	335.294	TRUE	0.788629	20339.9	0.00137334	C22H40O2	-H(-)	55	HMDB0061714	Docosadienoate (22:2n6)	Lipids and lipid-like molecules	Fatty Acyls	Fatty acids and conjugates	Aliphatic acyclic compounds	Very long-chain fatty acids	yes	Docosadienoate (22:2n6)
meta_714	714	336.013	TRUE	0.101343	15003.9	-0.000752434	C13H11N3O4S2	-H(-)	100	HMDB0014612	Tenoxicam	Organoheterocyclic compounds	Thienothiazines	Not classified	Aromatic heteropolycyclic compounds	Thienothiazines	NA	Tenoxicam
meta_715	715	336.049	TRUE	0.86515	440342	-4.13e-05	C11H16NO9P	-H(-)	100	HMDB0001132	Nicotinic acid mononucleotide	Organic oxygen compounds	Organooxygen compounds	Carbohydrates and carbohydrate conjugates	Aliphatic heteromonocyclic compounds	Pentose phosphates	NA	Nicotinic acid mononucleotide
meta_716	716	337.128	TRUE	0.790001	12667.4	0.00153785	C17H22O7	-H(-)	42	HMDB0033444	15-Acetyl-4-deoxynivalenol	Lipids and lipid-like molecules	Prenol lipids	Sesquiterpenoids	Aliphatic heteropolycyclic compounds	Trichothecenes	NA	15-Acetyl-4-deoxynivalenol
meta_717	717	337.203	TRUE	0.622399	32601	0.000328424	C20H26N4O	-H(-)	100	HMDB0014727	Lisuride	Organoheterocyclic compounds	Quinolines and derivatives	Indoloquinolines	Aromatic heteropolycyclic compounds	Indoloquinolines	NA	Lisuride
meta_718	718	339.087	TRUE	0.698688	10165.9	0.000248282	C19H16O6	-H(-)	100	HMDB0030591	Dihydro-O-methylsterigmatocystin	Phenylpropanoids and polyketides	Sterigmatocystins	Not classified	Aromatic heteropolycyclic compounds	Sterigmatocystins	NA	Dihydro-O-methylsterigmatocystin
meta_719	719	340.167	TRUE	0.780729	6200.92	-0.000509058	C19H23N3O3	-H(-)	100	HMDB0032382	N1-(2-Methoxy-4-methylbenzyl)-n2-(2-(5-methylpyridin-2-yl)ethyl)oxalamide	Organic acids and derivatives	Carboxylic acids and derivatives	Amino acids, peptides, and analogues	Aromatic heteromonocyclic compounds	Alpha amino acid amides	NA	N1-(2-Methoxy-4-methylbenzyl)-n2-(2-(5-methylpyridin-2-yl)ethyl)oxalamide
meta_720	720	340.287	TRUE	0.73736	7560.17	-0.00129784	C20H39NO3	-H(-)	62	HMDB0013308	Stearoylglycine	Organic acids and derivatives	Carboxylic acids and derivatives	Amino acids, peptides, and analogues	Aliphatic acyclic compounds	N-acyl-alpha amino acids	NA	Stearoylglycine
meta_721	721	341.031	TRUE	0.696462	15252.1	-0.00110457	C17H10O8	-H(-)	85	HMDB0128437	4,13,14-trihydroxy-9-oxo-8,17-dioxatetracyclo[8.7.0.0虏,樊0鹿鹿,鹿遁heptadeca-1(10),2,4,6,11(16),12,14-heptaen-5-yl acetate	Phenylpropanoids and polyketides	Isoflavonoids	Coumestans	Aromatic heteropolycyclic compounds	Coumestans	NA	4,13,14-trihydroxy-9-oxo-8,17-dioxatetracyclo[8.7.0.0虏,樊0鹿鹿,鹿遁heptadeca-1(10),2,4,6,11(16),12,14-heptaen-5-yl acetate
meta_722	722	341.108	TRUE	0.650256	13457.7	0.000916466	C12H22O11	-H(-)	100	HMDB0000048	Melibiose	Organic oxygen compounds	Organooxygen compounds	Carbohydrates and carbohydrate conjugates	Aliphatic heteromonocyclic compounds	O-glycosyl compounds	NA	Melibiose
meta_723	723	341.161	TRUE	0.737133	10798.7	-4.17e-05	C17H26O7	-H(-)	100	HMDB0032870	Jasmolone glucoside	Organic oxygen compounds	Organooxygen compounds	Carbohydrates and carbohydrate conjugates	Aliphatic heteromonocyclic compounds	O-glycosyl compounds	NA	Jasmolone glucoside
meta_724	724	341.234	TRUE	0.818869	27531.1	-0.00080533	C19H34O5	-H(-)	100	HMDB0040901	13-Hydroxy-9-methoxy-10-oxo-11-octadecenoic acid	Lipids and lipid-like molecules	Fatty Acyls	Lineolic acids and derivatives	Aliphatic acyclic compounds	Lineolic acids and derivatives	NA	13-Hydroxy-9-methoxy-10-oxo-11-octadecenoic acid
meta_725	725	342.264	TRUE	0.763815	12990.6	0.000875563	C19H37NO4	-H(-)	100	HMDB0002250	Dodecanoylcarnitine	Lipids and lipid-like molecules	Fatty Acyls	Fatty acid esters	Aliphatic acyclic compounds	Acyl carnitines	NA	Dodecanoylcarnitine
meta_726	726	343.212	TRUE	0.681942	31189.5	0.000173225	C18H32O6	-H(-)	100	HMDB0037146	5(6)-Pentyl-1,4-dioxan-2-one	Organoheterocyclic compounds	Dioxanes	1,4-dioxanes	Not classified	1,4-dioxanes	NA	5(6)-Pentyl-1,4-dioxan-2-one
meta_727	727	343.262	TRUE	0.734207	8702.74	0.00244094	C23H36O2	-H(-)	10	HMDB0035582	1-Phenyl-1,3-heptadecanedione	Organic oxygen compounds	Organooxygen compounds	Carbonyl compounds	Aromatic homomonocyclic compounds	Alkyl-phenylketones	NA	1-Phenyl-1,3-heptadecanedione
meta_728	728	344.244	TRUE	0.686368	7156.3	0.000538417	C18H35NO5	-H(-)	100	HMDB0061637	3-hydroxyundecanoyl carnitine	Lipids and lipid-like molecules	Fatty Acyls	Fatty acid esters	Aliphatic acyclic compounds	Acyl carnitines	NA	3-hydroxyundecanoyl carnitine
meta_729	729	349.274	TRUE	0.110374	22729.1	0.000875263	C22H38O3	-H(-)	100	HMDB0031126	3,4-Dimethyl-5-pentyl-2-furanundecanoic acid	Lipids and lipid-like molecules	Fatty Acyls	Fatty acids and conjugates	Aromatic heteromonocyclic compounds	Long-chain fatty acids	NA	3,4-Dimethyl-5-pentyl-2-furanundecanoic acid
meta_730	730	350.027	TRUE	0.757613	9299.23	0.000845472	C14H13N3O4S2	-H(-)	100	HMDB0014952	Meloxicam	Organoheterocyclic compounds	Benzothiazines	Not classified	Aromatic heteropolycyclic compounds	Benzothiazines	NA	Meloxicam
meta_731	731	350.162	TRUE	0.70382	8201.14	0.000744111	C19H21N5O2	-H(-)	100	HMDB0014808	Pirenzepine	Organoheterocyclic compounds	Benzodiazepines	1,4-benzodiazepines	Aromatic heteropolycyclic compounds	1,4-benzodiazepines	NA	Pirenzepine
meta_732	732	351.013	TRUE	0.850556	4.22032e+06	0.00129881	C18H8O8	-H(-)	45	HMDB0030552	Thelephoric acid	Organoheterocyclic compounds	Benzofurans	Not classified	Aromatic heteropolycyclic compounds	Benzofurans	NA	Thelephoric acid
meta_733	733	351.216	TRUE	0.84185	28563.9	0.00148033	C20H32O5	-H(-)	46	HMDB0001220	Prostaglandin E2	Lipids and lipid-like molecules	Fatty Acyls	Eicosanoids	Aliphatic homomonocyclic compounds	Prostaglandins and related compounds	NA	Prostaglandin E2
meta_734	734	352.066	TRUE	0.715766	25583.3	0.00151367	C15H15NO9	-H(-)	44	HMDB0134940	5-[(6-carboxy-3,4,5-trihydroxyoxan-2-yl)oxy]-1H-indole-3-carboxylic acid	Organic oxygen compounds	Organooxygen compounds	Carbohydrates and carbohydrate conjugates	Aromatic heteropolycyclic compounds	Phenolic glycosides	NA	5-[(6-carboxy-3,4,5-trihydroxyoxan-2-yl)oxy]-1H-indole-3-carboxylic acid
meta_735	735	352.082	TRUE	0.90972	60168.8	0.000914529	C19H15NO6	-H(-)	100	HMDB0015487	Acenocoumarol	Phenylpropanoids and polyketides	Coumarins and derivatives	Hydroxycoumarins	Aromatic heteropolycyclic compounds	4-hydroxycoumarins	NA	Acenocoumarol
meta_736	736	353.031	TRUE	0.654343	62449.9	-0.000511383	C18H10O8	-H(-)	100	HMDB0029682	Cyclovariegatin	Organoheterocyclic compounds	Benzofurans	Not classified	Aromatic heteropolycyclic compounds	Benzofurans	NA	Cyclovariegatin
meta_737	737	353.249	TRUE	0.767255	8160.21	-7.77e-06	C24H34O2	-H(-)	100	HMDB0039760	1,1'-[1,12-Dodecanediylbis(oxy)]bisbenzene	Benzenoids	Phenol ethers	Not classified	Aromatic homomonocyclic compounds	Phenol ethers	NA	1,1'-[1,12-Dodecanediylbis(oxy)]bisbenzene
meta_738	738	354.301	TRUE	0.742486	8023.15	0.00073053	C21H41NO3	-H(-)	100	HMDB0013303	Pristanoylglycine	Lipids and lipid-like molecules	Prenol lipids	Diterpenoids	Aliphatic acyclic compounds	Acyclic diterpenoids	NA	Pristanoylglycine
meta_739	739	355.179	TRUE	0.609521	60471.6	-0.000159127	C21H26NO4	-H(-)	100	HMDB0033356	Xanthoplanine	Alkaloids and derivatives	Aporphines	Not classified	Aromatic heteropolycyclic compounds	Aporphines	NA	Xanthoplanine
meta_740	740	357.029	TRUE	0.912321	2.60979e+06	-0.000484055	C14H14O9S	-H(-)	31	HMDB0132923	(2-hydroxy-2-{9-hydroxy-7-oxo-2H,3H,7H-furo[3,2-g]chromen-2-yl}propoxy)sulfonic acid	Phenylpropanoids and polyketides	Coumarins and derivatives	Furanocoumarins	Aromatic heteropolycyclic compounds	Psoralens	NA	(2-hydroxy-2-{9-hydroxy-7-oxo-2H,3H,7H-furo[3,2-g]chromen-2-yl}propoxy)sulfonic acid
meta_741	741	357.227	TRUE	0.762802	18449.3	-0.000925017	C15H30N6O4	-H(-)	100	HMDB0012983	Kinetensin 1-3	Not classified	Not classified	Not classified	Not classified	Not classified	NA	Kinetensin 1-3
meta_742	742	360.13	TRUE	0.249727	16397.4	0.000460508	C15H23NO9	-H(-)	100	HMDB0041208	De-O-methylsimmondsin	Organic oxygen compounds	Organooxygen compounds	Carbohydrates and carbohydrate conjugates	Aliphatic heteromonocyclic compounds	O-glycosyl compounds	NA	De-O-methylsimmondsin
meta_743	743	363.017	TRUE	0.804383	13263.6	0.000370165	C10H13N4O7PS	-H(-)	100	HMDB0060416	6-Thioinosine-5'-monophosphate	Nucleosides, nucleotides, and analogues	Purine nucleotides	Purine ribonucleotides	Aromatic heteropolycyclic compounds	Purine ribonucleoside monophosphates	NA	6-Thioinosine-5'-monophosphate
meta_744	744	363.087	TRUE	0.679538	11529.3	0.000413502	C21H16O6	-H(-)	100	HMDB0033304	Gerberinol	Phenylpropanoids and polyketides	Coumarins and derivatives	Hydroxycoumarins	Aromatic heteropolycyclic compounds	4-hydroxycoumarins	NA	Gerberinol
meta_745	745	364.052	TRUE	0.73404	6398.77	0.00117443	C16H16ClN3O3S	-H(-)	19	HMDB0014665	Metolazone	Organoheterocyclic compounds	Diazanaphthalenes	Benzodiazines	Aromatic heteropolycyclic compounds	Quinazolines	NA	Metolazone
meta_746	746	364.287	TRUE	0.61141	6868.3	-0.00113003	C22H39NO3	-H(-)	81	HMDB0062334	N-Linoleoyl GABA	Organic acids and derivatives	Carboxylic acids and derivatives	Amino acids, peptides, and analogues	Aliphatic acyclic compounds	Gamma amino acids and derivatives	NA	N-Linoleoyl GABA
meta_747	747	364.995	TRUE	0.76508	8889.28	0.00229742	C15H10O9S	-H(-)	12	HMDB0038471	Luteolin 4'-sulfate	Phenylpropanoids and polyketides	Flavonoids	Flavones	Aromatic heteropolycyclic compounds	Flavones	NA	Luteolin 4'-sulfate
meta_748	748	365.135	TRUE	0.788694	13118.8	0.000429217	C17H22N2O7	-H(-)	100	HMDB0029992	Tetrahydropentoxyline	Alkaloids and derivatives	Harmala alkaloids	Not classified	Aromatic heteropolycyclic compounds	Harmala alkaloids	NA	Tetrahydropentoxyline
meta_749	749	365.378	TRUE	0.798092	6124.46	0.000785654	C25H50O	-H(-)	100	HMDB0040907	7-Pentacosanone	Organic oxygen compounds	Organooxygen compounds	Carbonyl compounds	Aliphatic acyclic compounds	Ketones	NA	7-Pentacosanone
meta_750	750	366.033	TRUE	0.708361	6157.77	-0.000839602	C15H14ClN3O4S	-H(-)	25	HMDB0014971	Cefaclor	Organic acids and derivatives	Carboxylic acids and derivatives	Amino acids, peptides, and analogues	Aromatic heteropolycyclic compounds	N-acyl-alpha amino acids and derivatives	NA	Cefaclor
meta_751	751	366.05	TRUE	0.841139	5729.54	-0.000340711	C12H17NO10S	-H(-)	100	HMDB0038486	Tetraphyllin B sulfate	Organic oxygen compounds	Organooxygen compounds	Carbohydrates and carbohydrate conjugates	Aliphatic heteromonocyclic compounds	Cyanogenic glycosides	NA	Tetraphyllin B sulfate
meta_752	752	366.3	TRUE	0.683596	7458.7	0.000940769	C22H41NO3	-H(-)	100	HMDB0062335	N-Oleoyl GABA	Organic acids and derivatives	Carboxylic acids and derivatives	Amino acids, peptides, and analogues	Aliphatic acyclic compounds	Gamma amino acids and derivatives	NA	N-Oleoyl GABA
meta_753	753	367.158	TRUE	0.931083	874874	0.00085176	C19H28O5S	-H(-)	100	HMDB0001032	Dehydroepiandrosterone sulfate	Lipids and lipid-like molecules	Steroids and steroid derivatives	Sulfated steroids	Aliphatic homopolycyclic compounds	Sulfated steroids	yes	Dehydroepiandrosterone sulfate
meta_754	754	368.131	TRUE	0.75812	9572.43	-0.00110702	C21H20FNO4	-H(-)	21	HMDB0014038	N-Deisopropyl-fluvastatin	Organoheterocyclic compounds	Pyrroles	Substituted pyrroles	Aromatic heteropolycyclic compounds	Phenylpyrroles	NA	N-Deisopropyl-fluvastatin
meta_755	755	368.279	TRUE	0.778044	10762.1	0.0011879	C21H39NO4	-H(-)	74	HMDB0002014	cis-5-Tetradecenoylcarnitine	Lipids and lipid-like molecules	Fatty Acyls	Fatty acid esters	Aliphatic acyclic compounds	Acyl carnitines	NA	cis-5-Tetradecenoylcarnitine
meta_756	756	368.316	TRUE	0.779477	9305	0.00123908	C22H43NO3	-H(-)	68	HMDB0062341	N-Stearoyl GABA	Organic acids and derivatives	Carboxylic acids and derivatives	Amino acids, peptides, and analogues	Aliphatic acyclic compounds	Gamma amino acids and derivatives	NA	N-Stearoyl GABA
meta_757	757	369.316	TRUE	0.819041	7131.09	0.000482829	C26H42O	-H(-)	100	HMDB0029863	(3beta,22E)-26,27-Dinorergosta-5,22-dien-3-ol	Lipids and lipid-like molecules	Steroids and steroid derivatives	Hydroxysteroids	Aliphatic homopolycyclic compounds	3-hydroxysteroids	NA	(3beta,22E)-26,27-Dinorergosta-5,22-dien-3-ol
meta_758	758	370.077	TRUE	0.698746	7119.34	0.000739878	C15H17NO10	-H(-)	100	HMDB0240252	Salicyluric beta-D-glucuronide	Organic oxygen compounds	Organooxygen compounds	Carbohydrates and carbohydrate conjugates	Aromatic heteromonocyclic compounds	O-glucuronides	NA	Salicyluric beta-D-glucuronide
meta_759	759	371.043	TRUE	0.764328	10943.9	0.00142035	C15H16O9S	-H(-)	51	HMDB0127736	{2-hydroxy-5-[2-hydroxy-3-(2,4,6-trihydroxyphenyl)propyl]phenyl}oxidanesulfonic acid	Phenylpropanoids and polyketides	Linear 1,3-diarylpropanoids	Cinnamylphenols	Aromatic homomonocyclic compounds	Cinnamylphenols	NA	{2-hydroxy-5-[2-hydroxy-3-(2,4,6-trihydroxyphenyl)propyl]phenyl}oxidanesulfonic acid
meta_760	760	371.176	TRUE	0.870288	42489.4	-0.000542301	C16H28N4O4S	-H(-)	100	HMDB0003134	Biocytin	Organic acids and derivatives	Carboxylic acids and derivatives	Amino acids, peptides, and analogues	Aliphatic heteropolycyclic compounds	L-alpha-amino acids	NA	Biocytin
meta_761	761	372.041	TRUE	0.748456	6286	0.00143436	C11H19NO9S2	-H(-)	50	HMDB0038427	Gluconapin	Organooxygen compounds	Carbohydrates and carbohydrate conjugates	Monosaccharides	Aliphatic heteromonocyclic compounds	Alkylglucosinolates	NA	Gluconapin
meta_762	762	373.274	TRUE	0.660892	16819.3	0.000915999	C24H38O3	-H(-)	100	HMDB0000308	3b-Hydroxy-5-cholenoic acid	Lipids and lipid-like molecules	Steroids and steroid derivatives	Bile acids, alcohols and derivatives	Aliphatic homopolycyclic compounds	Monohydroxy bile acids, alcohols and derivatives	yes	3b-Hydroxy-5-cholenoic acid
meta_763	763	375.29	TRUE	0.549028	23610.2	0.000664624	C24H40O3	-H(-)	100	HMDB0000381	Allolithocholic acid	Lipids and lipid-like molecules	Steroids and steroid derivatives	Bile acids, alcohols and derivatives	Aliphatic homopolycyclic compounds	Monohydroxy bile acids, alcohols and derivatives	NA	Allolithocholic acid
meta_764	764	377.195	TRUE	0.814231	22381.8	-0.000871371	C17H26N6O4	-H(-)	100	HMDB0003933	Pentosidine	Organic acids and derivatives	Carboxylic acids and derivatives	Amino acids, peptides, and analogues	Aromatic heteropolycyclic compounds	L-alpha-amino acids	NA	Pentosidine
meta_765	765	377.305	TRUE	-0.279021	15332	0.000693128	C24H42O3	-H(-)	100	HMDB0061649	3,ü4-üDimethyl-ü5-üpentyl-2-üfurantridecanoic acid	Lipids and lipid-like molecules	Fatty Acyls	Fatty acids and conjugates	Aromatic heteromonocyclic compounds	Long-chain fatty acids	NA	3,ü4-üDimethyl-ü5-üpentyl-2-üfurantridecanoic acid
meta_766	766	378.162	TRUE	0.806988	16955.2	-0.000169437	C22H22FN3O2	-H(-)	25	HMDB0014593	Droperidol	Organic oxygen compounds	Organooxygen compounds	Carbonyl compounds	Aromatic heteropolycyclic compounds	Alkyl-phenylketones	NA	Droperidol
meta_767	767	379.248	TRUE	0.769308	13847.1	0.00136378	C22H36O5	-H(-)	56	HMDB0002082	Bisnorcholic acid	Lipids and lipid-like molecules	Steroids and steroid derivatives	Bile acids, alcohols and derivatives	Aliphatic homopolycyclic compounds	Trihydroxy bile acids, alcohols and derivatives	NA	Bisnorcholic acid
meta_768	768	380.055	TRUE	0.673662	6987.4	0.00214201	C17H17O8S	-H(-)	16	HMDB0127811	3-hydroxy-2-(4-hydroxy-3,5-dimethoxyphenyl)-5-sulfino-3,4-dihydro-2H-1-benzopyran-7-olate	Phenylpropanoids and polyketides	Flavonoids	O-methylated flavonoids	Aromatic heteropolycyclic compounds	3'-O-methylated flavonoids	NA	3-hydroxy-2-(4-hydroxy-3,5-dimethoxyphenyl)-5-sulfino-3,4-dihydro-2H-1-benzopyran-7-olate
meta_769	769	380.115	TRUE	0.769607	7808.36	-0.00126421	C21H19NO6	-H(-)	65	HMDB0033522	Oxopurpureine	Alkaloids and derivatives	Aporphines	Not classified	Aromatic heteropolycyclic compounds	Aporphines	NA	Oxopurpureine
meta_770	770	380.156	TRUE	0.650652	5613.42	0.000323283	C15H27NO10	-H(-)	100	HMDB0033965	(R)-Pantothenic acid 4'-O-b-D-glucoside	Lipids and lipid-like molecules	Fatty Acyls	Fatty acyl glycosides	Aliphatic heteromonocyclic compounds	Fatty acyl glycosides	NA	(R)-Pantothenic acid 4'-O-b-D-glucoside
meta_771	771	381.192	TRUE	0.684567	64935.7	0.000176932	C20H30O7	-H(-)	100	HMDB0012553	12-Oxo-20-trihydroxy-leukotriene B4	Lipids and lipid-like molecules	Fatty Acyls	Eicosanoids	Aliphatic acyclic compounds	Leukotrienes	NA	12-Oxo-20-trihydroxy-leukotriene B4
meta_772	772	382.153	TRUE	0.753445	7512.19	-0.000588749	C19H21N5O4	-H(-)	100	HMDB0014600	Prazosin	Organoheterocyclic compounds	Diazinanes	Piperazines	Aromatic heteropolycyclic compounds	N-arylpiperazines	NA	Prazosin
meta_773	773	382.173	TRUE	0.446813	5901.7	0.00065025	C16H25N5O6	-H(-)	100	HMDB0012211	Dihydrozeatin-7-N-dihydrozeatin	Organic oxygen compounds	Organooxygen compounds	Carbohydrates and carbohydrate conjugates	Aromatic heteropolycyclic compounds	Glycosylamines	NA	Dihydrozeatin-7-N-dihydrozeatin
meta_774	774	383.207	TRUE	0.724482	21741.5	0.00101374	C20H32O7	-H(-)	98	HMDB0012643	20-Trihydroxy-leukotriene-B4	Lipids and lipid-like molecules	Fatty Acyls	Eicosanoids	Aliphatic acyclic compounds	Leukotrienes	NA	20-Trihydroxy-leukotriene-B4
meta_775	775	383.315	TRUE	0.631448	8994.58	0.00190257	C23H44O4	-H(-)	23	HMDB0011543	MG(0:0/20:1(11Z)/0:0)	Lipids and lipid-like molecules	Endocannabinoids	Not classified	Aliphatic acyclic compounds	Endocannabinoids	NA	MG(0:0/20:1(11Z)/0:0)
meta_776	776	383.333	TRUE	0.605191	5500.95	-0.000678108	C27H44O	-H(-)	100	HMDB0000032	7-Dehydrocholesterol	Lipids and lipid-like molecules	Steroids and steroid derivatives	Cholestane steroids	Aliphatic homopolycyclic compounds	Cholesterols and derivatives	NA	7-Dehydrocholesterol
meta_777	777	383.351	TRUE	0.647554	11854.4	0.00161085	C24H48O3	-H(-)	37	HMDB0039540	Cerebronic acid	Lipids and lipid-like molecules	Fatty Acyls	Fatty acids and conjugates	Aliphatic acyclic compounds	Very long-chain fatty acids	NA	Cerebronic acid
meta_778	778	384.312	TRUE	0.658054	5101.84	-5.82e-05	C22H43NO4	-H(-)	100	HMDB0062517	Pentadecanoylcarnitine	Lipids and lipid-like molecules	Fatty Acyls	Fatty acid esters	Aliphatic acyclic compounds	Acyl carnitines	NA	Pentadecanoylcarnitine
meta_779	779	385.025	TRUE	0.743408	7754.89	-0.00162321	C15H14O10S	-H(-)	37	HMDB0141560	[2,6-dihydroxy-4-(3,5,7-trihydroxy-3,4-dihydro-2H-1-benzopyran-2-yl)phenyl]oxidanesulfonic acid	Phenylpropanoids and polyketides	Flavonoids	Flavans	Aromatic heteropolycyclic compounds	Epigallocatechins	NA	[2,6-dihydroxy-4-(3,5,7-trihydroxy-3,4-dihydro-2H-1-benzopyran-2-yl)phenyl]oxidanesulfonic acid
meta_780	780	385.049	TRUE	0.762223	5921.64	0.000614164	C18H14N2O6S	-H(-)	100	HMDB0041567	Lithol Rubine	Organoheterocyclic compounds	Azobenzenes	Not classified	Aromatic homopolycyclic compounds	Azobenzenes	NA	Lithol Rubine
meta_781	781	385.203	TRUE	0.831591	21388.2	-0.000904594	C23H30O5	-H(-)	100	HMDB0030032	Euglobal Ia1	Organoheterocyclic compounds	Benzopyrans	1-benzopyrans	Aromatic heteropolycyclic compounds	Xanthenes	NA	Euglobal Ia1
meta_782	782	385.331	TRUE	0.686206	6753.61	0.00141333	C23H46O4	-H(-)	51	HMDB0011147	DG(18:0e/2:0/0:0)	Lipids and lipid-like molecules	Glycerolipids	Diradylglycerols	Aliphatic acyclic compounds	1-alkyl,2-acylglycerols	NA	DG(18:0e/2:0/0:0)
meta_783	783	386.986	TRUE	0.556514	18302	-0.000572392	C14H12O9S2	-H(-)	100	HMDB0041780	trans-Resveratrol 3,4'-disulfate	Phenylpropanoids and polyketides	Stilbenes	Not classified	Aromatic homomonocyclic compounds	Stilbenes	NA	trans-Resveratrol 3,4'-disulfate
meta_784	784	387.059	TRUE	0.726463	5160.98	-0.00181357	C15H16O12	-H(-)	27	HMDB0125277	6-[5-(2-carboxy-2-oxoethyl)-2,3-dihydroxyphenoxy]-3,4,5-trihydroxyoxane-2-carboxylic acid	Organic oxygen compounds	Organooxygen compounds	Carbohydrates and carbohydrate conjugates	Aromatic heteromonocyclic compounds	Phenolic glycosides	NA	6-[5-(2-carboxy-2-oxoethyl)-2,3-dihydroxyphenoxy]-3,4,5-trihydroxyoxane-2-carboxylic acid
meta_785	785	387.181	TRUE	0.815881	22176.8	0.000775834	C22H28O6	-H(-)	100	HMDB0030711	Cyclomammein	Phenylpropanoids and polyketides	Coumarins and derivatives	Furanocoumarins	Aromatic heteropolycyclic compounds	Angular furanocoumarins	NA	Cyclomammein
meta_786	786	388.074	TRUE	0.708389	3626.1	-0.000144094	C12H23NO9S2	-H(-)	100	HMDB0038412	3-Methylbutyl glucosinolate	Organic oxygen compounds	Organooxygen compounds	Carbohydrates and carbohydrate conjugates	Aliphatic heteromonocyclic compounds	Alkylglucosinolates	NA	3-Methylbutyl glucosinolate
meta_787	787	388.119	TRUE	0.687916	4373.97	-0.000451235	C23H19NO5	-H(-)	100	HMDB0039896	xi-8-Acetonyldihydrosanguinarine	Alkaloids and derivatives	Benzophenanthridine alkaloids	Dihydrobenzophenanthridine alkaloids	Aromatic heteropolycyclic compounds	Dihydrobenzophenanthridine alkaloids	NA	xi-8-Acetonyldihydrosanguinarine
meta_788	788	389.05	TRUE	0.540917	11498.9	-0.0010516	C11H19O13P	-H(-)	92	HMDB0006953	1-Phosphatidyl-D-myo-inositol	Lipids and lipid-like molecules	Glycerophospholipids	Glycerophosphoinositols	Aliphatic homomonocyclic compounds	Phosphatidylinositols	NA	1-Phosphatidyl-D-myo-inositol
meta_789	789	389.161	TRUE	0.760717	19191.7	-0.00041918	C21H26O7	-H(-)	100	HMDB0030502	(2S,4S,6S)-2-[2-(4-Hydroxy-3-meyhoxyphenyl)ethyl]tetrahydro-6-(4,5-dihydroxy-3-methoxyphenyl)-2H-pyran-4-ol	Phenylpropanoids and polyketides	Diarylheptanoids	Linear diarylheptanoids	Aromatic heteromonocyclic compounds	Linear diarylheptanoids	NA	(2S,4S,6S)-2-[2-(4-Hydroxy-3-meyhoxyphenyl)ethyl]tetrahydro-6-(4,5-dihydroxy-3-methoxyphenyl)-2H-pyran-4-ol
meta_790	790	393.19	TRUE	0.84861	22652.7	0.0019322	C21H30O7	-H(-)	22	HMDB0032587	Pteroside Z	Benzenoids	Indanes	Indanones	Aromatic heteropolycyclic compounds	Indanones	NA	Pteroside Z
meta_791	791	396.276	TRUE	0.818928	6496.5	-0.000438437	C22H39NO5	-H(-)	100	HMDB0013628	PGF2a ethanolamide	Lipids and lipid-like molecules	Fatty Acyls	Eicosanoids	Aliphatic homomonocyclic compounds	Prostaglandins and related compounds	NA	PGF2a ethanolamide
meta_792	792	396.349	TRUE	0.668128	6947.76	-0.000807952	C24H47NO3	-H(-)	100	HMDB0013219	Behenoylglycine	Organic acids and derivatives	Carboxylic acids and derivatives	Amino acids, peptides, and analogues	Aliphatic acyclic compounds	N-acyl-alpha amino acids	NA	Behenoylglycine
meta_793	793	397.405	TRUE	0.824078	5293.48	0.000424873	C26H54O2	-H(-)	100	HMDB0036581	1,26-Hexacosanediol	Lipids and lipid-like molecules	Fatty Acyls	Fatty alcohols	Aliphatic acyclic compounds	Fatty alcohols	NA	1,26-Hexacosanediol
meta_794	794	399.219	TRUE	0.86745	37839.2	-0.00116226	C24H32O5	-H(-)	77	HMDB0030162	Nevskin	Phenylpropanoids and polyketides	Coumarins and derivatives	Not classified	Aromatic heteropolycyclic compounds	Coumarins and derivatives	NA	Nevskin
meta_795	795	399.252	TRUE	0.830544	8832.13	0.00241122	C25H36O4	-H(-)	10	HMDB0012518	11'-Carboxy-gamma-tocotrienol	Lipids and lipid-like molecules	Prenol lipids	Sesquiterpenoids	Aromatic heteropolycyclic compounds	Sesquiterpenoids	NA	11'-Carboxy-gamma-tocotrienol
meta_796	796	400.307	TRUE	0.639725	5026.9	0.00021815	C22H43NO5	-H(-)	100	HMDB0061641	3-hydroxypentadecanoyl carnitine	Lipids and lipid-like molecules	Fatty Acyls	Fatty acid esters	Aliphatic acyclic compounds	Acyl carnitines	NA	3-hydroxypentadecanoyl carnitine
meta_797	797	401.11	TRUE	0.790978	5635.35	-0.000738469	C17H22O11	-H(-)	100	HMDB0059971	4-Hydroxy-5-(3',4'-dihydroxyphenyl)-valeric acid-O-glucuronide	Organic oxygen compounds	Organooxygen compounds	Carbohydrates and carbohydrate conjugates	Aromatic heteromonocyclic compounds	O-glucuronides	NA	4-Hydroxy-5-(3',4'-dihydroxyphenyl)-valeric acid-O-glucuronide
meta_798	798	401.197	TRUE	0.825005	17060.5	-2.06e-05	C23H30O6	-H(-)	100	HMDB0015459	Cortisone acetate	Lipids and lipid-like molecules	Steroids and steroid derivatives	Pregnane steroids	Aliphatic homopolycyclic compounds	Gluco/mineralocorticoids, progestogins and derivatives	NA	Cortisone acetate
meta_799	799	401.305	TRUE	0.685259	7088.42	0.00130168	C26H42O3	-H(-)	62	HMDB0029458	Oryzarol	Benzenoids	Phenol esters	Not classified	Aromatic homomonocyclic compounds	Phenol esters	NA	Oryzarol
meta_800	800	402.095	TRUE	0.462918	3816.04	0.000328433	C20H19O9	-H(-)	100	HMDB0127911	2-{[5,7-dihydroxy-2-(3-hydroxyphenyl)-5H-chromen-3-yl]oxy}oxane-3,4,5-triol	Organic oxygen compounds	Organooxygen compounds	Carbohydrates and carbohydrate conjugates	Aromatic heteropolycyclic compounds	O-glycosyl compounds	NA	2-{[5,7-dihydroxy-2-(3-hydroxyphenyl)-5H-chromen-3-yl]oxy}oxane-3,4,5-triol
meta_801	801	402.3	TRUE	0.684357	4922.12	0.00090735	C25H41NO3	-H(-)	100	HMDB0062339	N-Palmitoyl phenylalanine	Organic acids and derivatives	Carboxylic acids and derivatives	Amino acids, peptides, and analogues	Aromatic homomonocyclic compounds	Phenylalanine and derivatives	NA	N-Palmitoyl phenylalanine
meta_802	802	402.995	TRUE	0.583443	14294.7	-0.000475268	C9H14N2O12P2	-H(-)	100	HMDB0000295	Uridine 5'-diphosphate	Nucleosides, nucleotides, and analogues	Pyrimidine nucleotides	Pyrimidine ribonucleotides	Aromatic heteromonocyclic compounds	Pyrimidine ribonucleoside diphosphates	NA	Uridine 5'-diphosphate
meta_803	803	403.114	TRUE	0.718064	6371.76	-0.00203287	C23H20N2O3S	-H(-)	19	HMDB0015269	Sulfinpyrazone	Benzenoids	Benzene and substituted derivatives	Phenyl sulfoxides	Aromatic heteromonocyclic compounds	Phenyl sulfoxides	NA	Sulfinpyrazone
meta_804	804	404.069	TRUE	0.69951	4289.05	-0.000293381	C12H23NO10S2	-H(-)	100	HMDB0034045	Glucocleomin	Organooxygen compounds	Carbohydrates and carbohydrate conjugates	Monosaccharides	Aliphatic heteromonocyclic compounds	Alkylglucosinolates	NA	Glucocleomin
meta_805	805	404.091	TRUE	0.592828	4510.73	0.00131638	C18H19N3O6S	-H(-)	60	HMDB0014827	Cephaloglycin	Organoheterocyclic compounds	Lactams	Beta lactams	Aromatic heteropolycyclic compounds	Cephalosporin 3'-esters	NA	Cephaloglycin
meta_806	806	404.221	TRUE	0.633605	5557	-0.00144766	C21H31N3O5	-H(-)	49	HMDB0001938	Lisinopril	Organic acids and derivatives	Carboxylic acids and derivatives	Amino acids, peptides, and analogues	Aromatic heteromonocyclic compounds	Dipeptides	NA	Lisinopril
meta_807	807	405.027	TRUE	0.742613	5714.24	0.00174393	C18H14O9S	-H(-)	30	HMDB0129391	{2-hydroxy-5-[3-(4-methoxy-1-benzofuran-5-yl)-3-oxopropanoyl]phenyl}oxidanesulfonic acid	Phenylpropanoids and polyketides	Linear 1,3-diarylpropanoids	Chalcones and dihydrochalcones	Aromatic heteropolycyclic compounds	Retro-dihydrochalcones	NA	{2-hydroxy-5-[3-(4-methoxy-1-benzofuran-5-yl)-3-oxopropanoyl]phenyl}oxidanesulfonic acid
meta_808	808	405.17	TRUE	0.529387	294401	0.000472462	C25H26O5	-H(-)	100	HMDB0030628	Rubraflavone A	Phenylpropanoids and polyketides	Flavonoids	Flavones	Aromatic heteropolycyclic compounds	3-prenylated flavones	NA	Rubraflavone A
meta_809	809	406.029	TRUE	0.774988	4726.53	0.00136662	C11H21NO9S3	-H(-)	55	HMDB0039895	4-Mercaptobutyl glucosinolate	Organic oxygen compounds	Organooxygen compounds	Carbohydrates and carbohydrate conjugates	Aliphatic heteromonocyclic compounds	Alkylglucosinolates	NA	4-Mercaptobutyl glucosinolate
meta_810	810	407.044	TRUE	0.737324	5748.65	0.000572806	C18H16O9S	-H(-)	100	HMDB0129590	[4-(5-hydroxy-7-methoxy-8-methyl-4-oxo-4H-chromen-3-yl)-2-methoxyphenyl]oxidanesulfonic acid	Phenylpropanoids and polyketides	Isoflavonoids	O-methylated isoflavonoids	Aromatic heteropolycyclic compounds	7-O-methylisoflavones	NA	[4-(5-hydroxy-7-methoxy-8-methyl-4-oxo-4H-chromen-3-yl)-2-methoxyphenyl]oxidanesulfonic acid
meta_811	811	407.079	TRUE	0.761057	5667.79	0.00149611	C19H20O8S	-H(-)	45	HMDB0125570	{3-[(E)-2-[3,5-dihydroxy-4-(3-methylbut-2-en-1-yl)phenyl]ethenyl]-2,6-dihydroxyphenyl}oxidanesulfonic acid	Phenylpropanoids and polyketides	Stilbenes	Not classified	Aromatic homomonocyclic compounds	Stilbenes	NA	{3-[(E)-2-[3,5-dihydroxy-4-(3-methylbut-2-en-1-yl)phenyl]ethenyl]-2,6-dihydroxyphenyl}oxidanesulfonic acid
meta_812	812	409.094	TRUE	0.796081	7807.94	-0.00154225	C22H18O8	-H(-)	42	HMDB0039327	3-(4-Hydroxybenzoyl)epicatechin	Phenylpropanoids and polyketides	Flavonoids	Flavans	Aromatic heteropolycyclic compounds	Catechins	NA	3-(4-Hydroxybenzoyl)epicatechin
meta_813	813	409.275	TRUE	0.831135	10544	-0.000433815	C27H38O3	-H(-)	100	HMDB0039020	5,8-Epoxy-5,8-dihydro-10'-apo-b,y-carotene-3,10'-diol	Lipids and lipid-like molecules	Prenol lipids	Sesterterpenoids	Aliphatic heteropolycyclic compounds	Sesterterpenoids	NA	5,8-Epoxy-5,8-dihydro-10'-apo-b,y-carotene-3,10'-diol
meta_814	814	409.311	TRUE	0.78867	11856.6	-0.000283952	C28H42O2	-H(-)	100	HMDB0012958	Gamma-Tocotrienol	Lipids and lipid-like molecules	Prenol lipids	Quinone and hydroquinone lipids	Aromatic heteropolycyclic compounds	Tocotrienols	NA	Gamma-Tocotrienol
meta_815	815	409.331	TRUE	0.806475	15206.6	0.00181203	C25H46O4	-H(-)	27	HMDB0011553	MG(0:0/22:2(13Z,16Z)/0:0)	Lipids and lipid-like molecules	Glycerolipids	Monoradylglycerols	Aliphatic acyclic compounds	2-monoacylglycerols	NA	MG(0:0/22:2(13Z,16Z)/0:0)
meta_816	816	410.16	TRUE	0.776135	9958.29	0.000437635	C23H25NO6	-H(-)	100	HMDB0033097	7-Formyldehydrothalicsimidine	Alkaloids and derivatives	Aporphines	Not classified	Aromatic heteropolycyclic compounds	Aporphines	NA	7-Formyldehydrothalicsimidine
meta_817	817	410.171	TRUE	0.779216	8647.39	0.00154397	C22H25N3O5	-H(-)	42	HMDB0038581	Dihydroxyfumitremorgin C	Organoheterocyclic compounds	Indoles and derivatives	Pyridoindoles	Aromatic heteropolycyclic compounds	Beta carbolines	NA	Dihydroxyfumitremorgin C
meta_818	818	411.011	TRUE	0.779817	13283.9	0.000642764	C10H14N4O10P2	-H(-)	100	HMDB0003536	dIDP	Nucleosides, nucleotides, and analogues	Purine nucleotides	Purine deoxyribonucleotides	Aromatic heteropolycyclic compounds	Purine 2'-deoxyribonucleoside diphosphates	NA	dIDP
meta_819	819	411.237	TRUE	0.775627	11043.9	0.00165533	C18H39NO7P	-H(-)	35	HMDB0003752	LysoPC(10:0)	Lipids and lipid-like molecules	Glycerophospholipids	Glycerophosphocholines	Aliphatic acyclic compounds	1-acyl-sn-glycero-3-phosphocholines	NA	LysoPC(10:0)
meta_820	820	411.289	TRUE	0.751435	7555.36	0.0011136	C27H40O3	-H(-)	83	HMDB0015567	Calcipotriol	Lipids and lipid-like molecules	Steroids and steroid derivatives	Vitamin D and derivatives	Aliphatic homopolycyclic compounds	Vitamin D and derivatives	NA	Calcipotriol
meta_821	821	415.248	TRUE	0.792666	10778.3	0.00121665	C25H36O5	-H(-)	71	HMDB0039596	Colupox a	Organoheterocyclic compounds	Benzofurans	Not classified	Aliphatic heteropolycyclic compounds	Benzofurans	NA	Colupox a
meta_822	822	415.392	TRUE	0.785493	6448.37	0.00238462	C29H52O	-H(-)	11	HMDB0000494	Stigmastanol	Lipids and lipid-like molecules	Steroids and steroid derivatives	Stigmastanes and derivatives	Aliphatic homopolycyclic compounds	Stigmastanes and derivatives	NA	Stigmastanol
meta_823	823	417.176	TRUE	0.716054	10441.8	0.000950644	C19H30O10	-H(-)	100	HMDB0040353	2-[4-(3-Hydroxypropyl)-2-methoxyphenoxy]-1,3-propanediol 1-glucoside	Organic oxygen compounds	Organooxygen compounds	Carbohydrates and carbohydrate conjugates	Aromatic heteromonocyclic compounds	O-glycosyl compounds	NA	2-[4-(3-Hydroxypropyl)-2-methoxyphenoxy]-1,3-propanediol 1-glucoside
meta_824	824	417.243	TRUE	0.800308	13886.5	-0.00144564	C21H39O6P	-H(-)	49	HMDB0007005	CPA(18:1(11Z)/0:0)	Lipids and lipid-like molecules	Glycerophospholipids	Glycerophosphates	Aliphatic heteromonocyclic compounds	1-acyl-sn-glycerol-2,3-cyclic-phosphates	NA	CPA(18:1(11Z)/0:0)
meta_825	825	417.285	TRUE	0.705248	8566.28	0.000809868	C22H42O7	-H(-)	100	HMDB0010331	Palmitoyl glucuronide	Lipids and lipid-like molecules	Fatty Acyls	Fatty acyl glycosides	Aliphatic heteromonocyclic compounds	Fatty acyl glycosides of mono- and disaccharides	NA	Palmitoyl glucuronide
meta_826	826	419.103	TRUE	0.705474	7322.77	0.000429234	C26H16N2O4	-H(-)	100	HMDB0040774	Bismurrayaquinone A	Organoheterocyclic compounds	Indoles and derivatives	Carbazoles	Aromatic heteropolycyclic compounds	Carbazoles	NA	Bismurrayaquinone A
meta_827	827	419.115	TRUE	0.662196	7636.64	-0.000938838	C24H20O7	-H(-)	100	HMDB0030488	Artonol B	Organoheterocyclic compounds	Benzopyrans	1-benzopyrans	Aromatic heteropolycyclic compounds	Pyranoxanthones	NA	Artonol B
meta_828	828	421.045	TRUE	0.710313	71332.5	7.65e-05	C15H18O12S	-H(-)	100	HMDB0041173	1-O-Caffeoyl-(b-D-glucose 6-O-sulfate)	Phenylpropanoids and polyketides	Cinnamic acids and derivatives	Hydroxycinnamic acids and derivatives	Aromatic heteromonocyclic compounds	Hydroxycinnamic acid glycosides	NA	1-O-Caffeoyl-(b-D-glucose 6-O-sulfate)
meta_829	829	421.114	TRUE	0.745293	8256.35	0.00035229	C20H22O10	-H(-)	100	HMDB0036398	Rumexoside	Organic oxygen compounds	Organooxygen compounds	Carbohydrates and carbohydrate conjugates	Aromatic heteropolycyclic compounds	Phenolic glycosides	NA	Rumexoside
meta_830	830	422.013	TRUE	0.75918	8284.29	-0.000591855	C16H13N3O7S2	-H(-)	100	HMDB0033381	5-Amino-4-hydroxy-3-(phenylazo)-2,7-naphthalenedisulfonic acid	Benzenoids	Naphthalenes	Naphthalene sulfonic acids and derivatives	Aromatic homopolycyclic compounds	2-naphthalene sulfonic acids and derivatives	NA	5-Amino-4-hydroxy-3-(phenylazo)-2,7-naphthalenedisulfonic acid
meta_831	831	423.072	TRUE	0.678364	15622.2	0.00063473	C22H16O9	-H(-)	100	HMDB0039567	BL V	Organoheterocyclic compounds	Benzofurans	Phenylbenzofurans	Aromatic heteropolycyclic compounds	Phenylbenzofurans	NA	BL V
meta_832	832	423.138	TRUE	0.845757	48162.1	-9.31e-06	C23H24N2O4S	-H(-)	100	HMDB0015014	Eprosartan	Benzenoids	Benzene and substituted derivatives	Benzoic acids and derivatives	Aromatic heteromonocyclic compounds	Benzoic acids	NA	Eprosartan
meta_833	833	423.165	TRUE	0.682507	17819.3	0.00082231	C21H28O9	-H(-)	100	HMDB0035249	Taraxinic acid glucosyl ester	Lipids and lipid-like molecules	Prenol lipids	Terpene lactones	Aliphatic heteropolycyclic compounds	Germacranolides and derivatives	NA	Taraxinic acid glucosyl ester
meta_834	834	424.247	TRUE	0.748222	6605.41	-0.00011654	C19H40NO7P	-H(-)	100	HMDB0011470	LysoPE(0:0/14:0)	Lipids and lipid-like molecules	Glycerophospholipids	Glycerophosphoethanolamines	Aliphatic acyclic compounds	2-acyl-sn-glycero-3-phosphoethanolamines	NA	LysoPE(0:0/14:0)
meta_835	835	425.05	TRUE	0.800071	17324.1	0.0014957	C21H14O10	-H(-)	45	HMDB0128404	5,14-bis(acetyloxy)-4-hydroxy-9-oxo-8,17-dioxatetracyclo[8.7.0.0虏,樊0鹿鹿,鹿遁heptadeca-1(10),2,4,6,11,13,15-heptaen-13-yl acetate	Phenylpropanoids and polyketides	Isoflavonoids	Coumestans	Aromatic heteropolycyclic compounds	Coumestans	NA	5,14-bis(acetyloxy)-4-hydroxy-9-oxo-8,17-dioxatetracyclo[8.7.0.0虏,樊0鹿鹿,鹿遁heptadeca-1(10),2,4,6,11,13,15-heptaen-13-yl acetate
meta_836	836	425.256	TRUE	0.773412	8918.53	-0.00104956	C23H38O7	-H(-)	92	HMDB0013043	Prostaglandin PGE2 1-glyceryl ester	Lipids and lipid-like molecules	Fatty Acyls	Eicosanoids	Aliphatic homomonocyclic compounds	Prostaglandins and related compounds	NA	Prostaglandin PGE2 1-glyceryl ester
meta_837	837	425.342	TRUE	0.753886	12208.9	0.000961247	C29H46O2	-H(-)	100	HMDB0012167	4alpha-Formyl-4beta-methyl-5alpha-cholesta-8,24-dien-3beta-ol	Lipids and lipid-like molecules	Prenol lipids	Triterpenoids	Aliphatic homopolycyclic compounds	Triterpenoids	NA	4alpha-Formyl-4beta-methyl-5alpha-cholesta-8,24-dien-3beta-ol
meta_838	838	426.184	TRUE	0.734478	7913.97	0.000327976	C25H30ClNO3	-H(-)	25	HMDB0042055	Trospium chloride	Benzenoids	Benzene and substituted derivatives	Diphenylmethanes	Not classified	Diphenylmethanes	NA	Trospium chloride
meta_839	839	427.005	TRUE	0.509432	22985.4	0.00150523	C10H14N4O11P2	-H(-)	44	HMDB0003335	IDP	Nucleosides, nucleotides, and analogues	Purine nucleotides	Purine ribonucleotides	Aromatic heteropolycyclic compounds	Purine ribonucleoside diphosphates	NA	IDP
meta_840	840	427.225	TRUE	0.896782	80243.4	0.000125073	C25H28N6O	-H(-)	100	HMDB0015163	Irbesartan	Benzenoids	Benzene and substituted derivatives	Biphenyls and derivatives	Aromatic heteropolycyclic compounds	Biphenyls and derivatives	NA	Irbesartan
meta_841	841	427.393	TRUE	0.841863	5553	0.00105256	C30H52O	-H(-)	92	HMDB0006836	Tetrahymanol	Lipids and lipid-like molecules	Prenol lipids	Triterpenoids	Aliphatic homopolycyclic compounds	Triterpenoids	NA	Tetrahymanol
meta_842	842	429.082	TRUE	0.621932	17948.3	0.000991309	C21H18O10	-H(-)	100	HMDB0033587	Coumestrin	Phenylpropanoids and polyketides	Isoflavonoids	Coumestans	Aromatic heteropolycyclic compounds	Coumestans	NA	Coumestrin
meta_843	843	430.114	TRUE	0.988718	5913.99	-0.000841785	C15H22N5O8P	-H(-)	100	HMDB0034811	Ribosylzeatin phosphate	Nucleosides, nucleotides, and analogues	Purine nucleotides	Purine ribonucleotides	Aromatic heteropolycyclic compounds	Purine ribonucleoside monophosphates	NA	Ribosylzeatin phosphate
meta_844	844	431.054	TRUE	0.806391	15557.1	-5.05e-05	C21H17ClO8	-H(-)	25	HMDB0033338	Mollicellin F	Organoheterocyclic compounds	Benzopyrans	1-benzopyrans	Aromatic heteropolycyclic compounds	2,2-dimethyl-1-benzopyrans	NA	Mollicellin F
meta_845	845	431.296	TRUE	0.847244	11597.9	-0.000689914	C30H40O2	-H(-)	100	HMDB0035091	beta-Citraurin	Lipids and lipid-like molecules	Prenol lipids	Triterpenoids	Aliphatic homomonocyclic compounds	Triterpenoids	NA	beta-Citraurin
meta_846	846	432.13	TRUE	0.754865	7113.71	-0.000376209	C21H23NO9	-H(-)	100	HMDB0042044	Tolmetin glucuronide	Organic oxygen compounds	Organooxygen compounds	Carbohydrates and carbohydrate conjugates	Aromatic heteromonocyclic compounds	O-glucuronides	NA	Tolmetin glucuronide
meta_847	847	433.112	TRUE	0.784373	9037.56	0.00186513	C21H22O10	-H(-)	25	HMDB0031347	2-O-Caffeoylarbutin	Organic oxygen compounds	Organooxygen compounds	Carbohydrates and carbohydrate conjugates	Aromatic heteromonocyclic compounds	Phenolic glycosides	NA	2-O-Caffeoylarbutin
meta_848	848	434.219	TRUE	0.743663	9536.66	0.00044545	C24H29N5O3	-H(-)	100	HMDB0014323	Valsartan	Organic acids and derivatives	Carboxylic acids and derivatives	Amino acids, peptides, and analogues	Aromatic heteromonocyclic compounds	Valine and derivatives	NA	Valsartan
meta_849	849	435.133	TRUE	0.795491	8048.19	0.00128994	C22H21ClN6O2	-H(-)	16	HMDB0060553	E-3174	Benzenoids	Benzene and substituted derivatives	Biphenyls and derivatives	Aromatic heteromonocyclic compounds	Biphenyls and derivatives	NA	E-3174
meta_850	850	435.42	TRUE	0.805906	7163.44	0.00108398	C29H56O2	-H(-)	87	HMDB0035234	14,16-Nonacosanedione	Organic oxygen compounds	Organooxygen compounds	Carbonyl compounds	Aliphatic acyclic compounds	Beta-diketones	NA	14,16-Nonacosanedione
meta_851	851	435.492	TRUE	0.722849	6718.7	0.00166103	C31H64	-H(-)	35	HMDB0030092	Hentriacontane	Hydrocarbons	Alkanes	Acyclic alkanes	Aliphatic acyclic compounds	Acyclic alkanes	NA	Hentriacontane
meta_852	852	436.224	TRUE	0.705735	7003.59	-0.000159484	C25H31N3O4	-H(-)	100	HMDB0033469	N1,N10-Dicoumaroylspermidine	Phenylpropanoids and polyketides	Cinnamic acids and derivatives	Hydroxycinnamic acids and derivatives	Aromatic homomonocyclic compounds	Coumaric acids and derivatives	NA	N1,N10-Dicoumaroylspermidine
meta_853	853	437.234	TRUE	0.724282	8385.33	-0.000834908	C27H34O5	-H(-)	100	HMDB0034184	Licorisoflavan A	Phenylpropanoids and polyketides	Isoflavonoids	O-methylated isoflavonoids	Aromatic heteropolycyclic compounds	7-O-methylated isoflavonoids	NA	Licorisoflavan A
meta_854	854	439.322	TRUE	0.837701	9884.46	-0.000140281	C29H44O3	-H(-)	100	HMDB0012560	13'-Hydroxy-alpha-tocotrienol	Lipids and lipid-like molecules	Prenol lipids	Quinone and hydroquinone lipids	Aromatic heteropolycyclic compounds	Tocotrienols	NA	13'-Hydroxy-alpha-tocotrienol
meta_855	855	440.156	TRUE	0.681166	10199.4	8.06e-05	C20H27NO10	-H(-)	100	HMDB0032803	Mandelonitrile rutinoside	Organic oxygen compounds	Organooxygen compounds	Carbohydrates and carbohydrate conjugates	Aromatic heteromonocyclic compounds	Cyanogenic glycosides	NA	Mandelonitrile rutinoside
meta_856	856	440.21	TRUE	0.77873	5306.84	-0.000307291	C26H27N5O2	-H(-)	100	HMDB0015637	Vilazodone	Organoheterocyclic compounds	Diazinanes	Piperazines	Aromatic heteropolycyclic compounds	N-arylpiperazines	NA	Vilazodone
meta_857	857	441.317	TRUE	0.752617	10980.4	-0.00116731	C32H42O	-H(-)	76	HMDB0040118	(all-E)-6'-Apo-y-caroten-6'-al	Lipids and lipid-like molecules	Prenol lipids	Triterpenoids	Aliphatic acyclic compounds	Triterpenoids	NA	(all-E)-6'-Apo-y-caroten-6'-al
meta_858	858	441.337	TRUE	0.777267	11314.6	0.00060198	C29H46O3	-H(-)	100	HMDB0001181	4a-Carboxy-4b-methyl-5a-cholesta-8,24-dien-3b-ol	Lipids and lipid-like molecules	Prenol lipids	Triterpenoids	Aliphatic homopolycyclic compounds	Triterpenoids	NA	4a-Carboxy-4b-methyl-5a-cholesta-8,24-dien-3b-ol
meta_859	859	443.111	TRUE	0.725194	6554.65	-0.00107896	C21H20N2O9	-H(-)	88	HMDB0060769	4-Hydroxyphenytoin glucuronide	Organic oxygen compounds	Organooxygen compounds	Carbohydrates and carbohydrate conjugates	Aromatic heteromonocyclic compounds	Phenolic glycosides	NA	4-Hydroxyphenytoin glucuronide
meta_860	860	445.222	TRUE	0.83009	18542.2	0.000997637	C25H34O7	-H(-)	100	HMDB0037037	Glycinoeclepin A	Lipids and lipid-like molecules	Fatty Acyls	Fatty acids and conjugates	Aliphatic heteropolycyclic compounds	Heterocyclic fatty acids	NA	Glycinoeclepin A
meta_861	861	445.295	TRUE	0.776083	16519.2	0.00120165	C27H42O5	-H(-)	72	HMDB0030913	Cepagenin	Lipids and lipid-like molecules	Prenol lipids	Triterpenoids	Aliphatic heteropolycyclic compounds	Triterpenoids	NA	Cepagenin
meta_862	862	448.306	TRUE	0.792935	165047	0.000922875	C26H43NO5	-H(-)	100	HMDB0000631	Deoxycholic acid glycine conjugate	Lipids and lipid-like molecules	Steroids and steroid derivatives	Bile acids, alcohols and derivatives	Aliphatic homopolycyclic compounds	Glycinated bile acids and derivatives	NA	Deoxycholic acid glycine conjugate
meta_863	863	449.989	TRUE	0.744677	13934.5	-0.00128309	C9H16N3O12P3	-H(-)	63	HMDB0061726	Dideoxycytidine 5'-Triphosphate	Nucleosides, nucleotides, and analogues	Pyrimidine nucleotides	Pyrimidine deoxyribonucleotides	Aromatic heteromonocyclic compounds	Pyrimidine 2',3'-dideoxyribonucleoside triphosphates	NA	Dideoxycytidine 5'-Triphosphate
meta_864	864	450.262	TRUE	0.810402	28294.2	0.000411573	C21H42NO7P	-H(-)	100	HMDB0011474	LysoPE(0:0/16:1(9Z))	Lipids and lipid-like molecules	Glycerophospholipids	Glycerophosphoethanolamines	Aliphatic acyclic compounds	2-acyl-sn-glycero-3-phosphoethanolamines	NA	LysoPE(0:0/16:1(9Z))
meta_865	865	450.263	TRUE	0.898151	22927.3	-0.00062412	C21H42NO7P	-H(-)	100	HMDB0011474	LysoPE(0:0/16:1(9Z))	Lipids and lipid-like molecules	Glycerophospholipids	Glycerophosphoethanolamines	Aliphatic acyclic compounds	2-acyl-sn-glycero-3-phosphoethanolamines	NA	LysoPE(0:0/16:1(9Z))
meta_866	866	453.197	TRUE	0.838826	21903.6	0.000613766	C19H34O12	-H(-)	100	HMDB0039214	Butyl (S)-3-hydroxybutyrate [arabinosyl-(1->6)-glucoside]	Lipids and lipid-like molecules	Fatty Acyls	Fatty acyl glycosides	Aliphatic heteromonocyclic compounds	Fatty acyl glycosides of mono- and disaccharides	NA	Butyl (S)-3-hydroxybutyrate [arabinosyl-(1->6)-glucoside]
meta_867	867	453.299	TRUE	0.791392	15006.6	0.00160185	C29H42O4	-H(-)	38	HMDB0006710	Ubiquinone-4	Lipids and lipid-like molecules	Prenol lipids	Quinone and hydroquinone lipids	Aliphatic homomonocyclic compounds	Ubiquinones	NA	Ubiquinone-4
meta_868	868	455.126	TRUE	0.728499	23025.6	-0.00169706	C18H24N4O8S	-H(-)	33	HMDB0060086	5-S-Glutathionyl-aminochrome reduced	Organic acids and derivatives	Carboxylic acids and derivatives	Amino acids, peptides, and analogues	Aromatic heteropolycyclic compounds	Peptides	NA	5-S-Glutathionyl-aminochrome reduced
meta_869	869	457.198	TRUE	0.727818	16130.1	-0.000400582	C24H30N2O7	-H(-)	100	HMDB0060716	2-Hydroxy-desipramine glucuronide	Organoheterocyclic compounds	Benzazepines	Dibenzazepines	Aromatic heteropolycyclic compounds	Dibenzazepines	NA	2-Hydroxy-desipramine glucuronide
meta_870	870	460.329	TRUE	0.673948	7584.1	-0.000649552	C24H47NO7	-H(-)	100	HMDB0000596	Glucosylsphingosine	Lipids and lipid-like molecules	Sphingolipids	Glycosphingolipids	Aliphatic heteromonocyclic compounds	Glycosphingolipids	NA	Glucosylsphingosine
meta_871	871	461.07	TRUE	0.757157	8406.68	0.00058842	C18H18N6O5S2	-H(-)	100	HMDB0015421	Cefamandole	Organoheterocyclic compounds	Lactams	Beta lactams	Aromatic heteropolycyclic compounds	Cephalosporins	NA	Cefamandole
meta_872	872	461.124	TRUE	0.628592	117014	0.000545807	C26H22O8	-H(-)	56	HMDB0040533	Artomunoxanthentrione epoxide	Organoheterocyclic compounds	Benzopyrans	1-benzopyrans	Aromatic heteropolycyclic compounds	Pyranoxanthones	NA	Artomunoxanthentrione epoxide
meta_873	873	461.265	TRUE	0.833917	28102.2	0.00200447	C23H43O7P	-H(-)	20	HMDB0062303	1-(11Z,14Z-eicosadienoyl)-glycero-3-phosphate	Lipids and lipid-like molecules	Glycerophospholipids	Glycerophosphates	Aliphatic acyclic compounds	1-acylglycerol-3-phosphates	NA	1-(11Z,14Z-eicosadienoyl)-glycero-3-phosphate
meta_874	874	462.115	TRUE	0.882459	94691.6	0.00146544	C22H23O11	-H(-)	47	HMDB0013689	Peonidin-3-glucoside	Phenylpropanoids and polyketides	Flavonoids	Flavonoid glycosides	Aromatic heteropolycyclic compounds	Anthocyanidin-3-O-glycosides	NA	Peonidin-3-glucoside
meta_875	875	463.071	TRUE	0.700494	7171.35	-0.000655635	C21H20O10S	-H(-)	100	HMDB0125583	[7-(2,4-dihydroxyphenyl)-5-methoxy-2,2-dimethyl-8-oxo-2H,3H,4H,8H-pyrano[3,2-g]chromen-3-yl]oxidanesulfonic acid	Phenylpropanoids and polyketides	Isoflavonoids	Hydroxyisoflavonoids	Aromatic heteropolycyclic compounds	Hydroxyisoflavonoids	NA	[7-(2,4-dihydroxyphenyl)-5-methoxy-2,2-dimethyl-8-oxo-2H,3H,4H,8H-pyrano[3,2-g]chromen-3-yl]oxidanesulfonic acid
meta_876	876	463.154	TRUE	0.771504	17984.6	-0.00106392	C24H29ClO7	-H(-)	23	HMDB0031674	Armillarinin	Lipids and lipid-like molecules	Prenol lipids	Sesquiterpenoids	Aromatic homopolycyclic compounds	Melleolides and analogues	NA	Armillarinin
meta_877	877	463.452	TRUE	0.81018	6466.82	0.000272681	C31H60O2	-H(-)	100	HMDB0035531	8,10-Hentriacontanedione	Organic oxygen compounds	Organooxygen compounds	Carbonyl compounds	Aliphatic acyclic compounds	Beta-diketones	NA	8,10-Hentriacontanedione
meta_878	878	464.072	TRUE	0.836703	5630.92	0.000572744	C14H27NO10S3	-H(-)	100	HMDB0038410	Glucohesperalin	Organic oxygen compounds	Organooxygen compounds	Carbohydrates and carbohydrate conjugates	Aliphatic heteromonocyclic compounds	Alkylglucosinolates	NA	Glucohesperalin
meta_879	879	464.278	TRUE	0.756826	37251.4	7.72e-05	C22H44NO7P	-H(-)	100	HMDB0010380	LysoPC(14:1(9Z))	Lipids and lipid-like molecules	Glycerophospholipids	Glycerophosphocholines	Aliphatic acyclic compounds	1-acyl-sn-glycero-3-phosphocholines	NA	LysoPC(14:1(9Z))
meta_880	880	464.301	TRUE	0.803099	41168.7	0.000805153	C26H43NO6	-H(-)	100	HMDB0000138	Glycocholic acid	Lipids and lipid-like molecules	Steroids and steroid derivatives	Bile acids, alcohols and derivatives	Aliphatic homopolycyclic compounds	Glycinated bile acids and derivatives	yes	Glycocholic acid
meta_881	881	465.466	TRUE	0.785871	7706.23	0.00179372	C31H62O2	-H(-)	28	HMDB0032682	10-Hydroxy-16-hentriacontanone	Lipids and lipid-like molecules	Fatty Acyls	Fatty alcohols	Aliphatic acyclic compounds	Fatty alcohols	NA	10-Hydroxy-16-hentriacontanone
meta_882	882	466.251	TRUE	0.772136	12500.3	0.000375724	C18H37N5O9	-H(-)	100	HMDB0014822	Tobramycin	Organic oxygen compounds	Organooxygen compounds	Carbohydrates and carbohydrate conjugates	Aliphatic heteromonocyclic compounds	4,6-disubstituted 2-deoxystreptamines	NA	Tobramycin
meta_883	883	467.171	TRUE	0.893482	25346.6	0.000255701	C26H28O8	-H(-)	100	HMDB0035732	Dukunolide D	Organoheterocyclic compounds	Naphthopyrans	Not classified	Aromatic heteropolycyclic compounds	Naphthopyrans	NA	Dukunolide D
meta_884	884	467.264	TRUE	0.823109	22568.8	0.00084999	C25H40O8	-H(-)	100	HMDB0010321	3,17-Androstanediol glucuronide	Lipids and lipid-like molecules	Steroids and steroid derivatives	Steroid esters	Aliphatic heteropolycyclic compounds	Steroid esters	NA	3,17-Androstanediol glucuronide
meta_885	885	467.427	TRUE	0.843433	21993.8	-0.00150492	C33H56O	-H(-)	44	HMDB0029587	Lansiol	Lipids and lipid-like molecules	Steroids and steroid derivatives	Ergostane steroids	Aliphatic homopolycyclic compounds	Ergosterols and derivatives	NA	Lansiol
meta_886	886	467.483	TRUE	0.824068	17136.2	0.000646799	C31H64O2	-H(-)	100	HMDB0031277	erythro-8,10-Hentriacontanediol	Lipids and lipid-like molecules	Fatty Acyls	Fatty alcohols	Aliphatic acyclic compounds	Fatty alcohols	NA	erythro-8,10-Hentriacontanediol
meta_887	887	469.118	TRUE	0.833712	8565.54	-0.000327893	C21H26O10S	-H(-)	100	HMDB0130104	[(1-{10-butanoyl-5,7-dihydroxy-8,8-dimethyl-2-oxo-2H,6H,7H,8H-pyrano[3,2-g]chromen-4-yl}propan-2-yl)oxy]sulfonic acid	Phenylpropanoids and polyketides	Coumarins and derivatives	Pyranocoumarins	Aromatic heteropolycyclic compounds	Linear pyranocoumarins	NA	[(1-{10-butanoyl-5,7-dihydroxy-8,8-dimethyl-2-oxo-2H,6H,7H,8H-pyrano[3,2-g]chromen-4-yl}propan-2-yl)oxy]sulfonic acid
meta_888	888	471.133	TRUE	0.682075	22289.2	0.00214426	C17H28O15	-H(-)	16	HMDB0039742	4-O-Methyl-a-D-glucosyl-(1->2)-b-D-xylosyl-(1->4)-D-xylose	Organic oxygen compounds	Organooxygen compounds	Carbohydrates and carbohydrate conjugates	Aliphatic heteromonocyclic compounds	Oligosaccharides	NA	4-O-Methyl-a-D-glucosyl-(1->2)-b-D-xylosyl-(1->4)-D-xylose
meta_889	889	477.103	TRUE	0.834982	12012.3	0.000917312	C22H22O12	-H(-)	100	HMDB0029479	Isorhamnetin 7-glucoside	Phenylpropanoids and polyketides	Flavonoids	Flavonoid glycosides	Aromatic heteropolycyclic compounds	Flavonoid-7-O-glycosides	NA	Isorhamnetin 7-glucoside
meta_890	890	477.945	TRUE	0.814887	10795.2	0.00085587	C15H14INO7S	-H(-)	25	HMDB0060076	3'-Monoiodo-L-thyronine 4'-O-sulfate	Organic acids and derivatives	Carboxylic acids and derivatives	Amino acids, peptides, and analogues	Aromatic homomonocyclic compounds	Phenylalanine and derivatives	NA	3'-Monoiodo-L-thyronine 4'-O-sulfate
meta_891	891	478.199	TRUE	0.809733	16111.1	-0.000275792	C26H29N3O6	-H(-)	100	HMDB0014760	Nicardipine	Organoheterocyclic compounds	Pyridines and derivatives	Hydropyridines	Aromatic heteromonocyclic compounds	Dihydropyridinecarboxylic acids and derivatives	NA	Nicardipine
meta_892	892	479.097	TRUE	0.693052	8194.48	0.000869597	C25H20O10	-H(-)	100	HMDB0040513	2,3-Dehydrosilybin	Lignans, neolignans and related compounds	Flavonolignans	Not classified	Aromatic heteropolycyclic compounds	Flavonolignans	NA	2,3-Dehydrosilybin
meta_893	893	479.445	TRUE	0.795593	7172.84	0.0021546	C31H60O3	-H(-)	16	HMDB0031056	8-Hydroxy-14,16-hentriacontanedione	Lipids and lipid-like molecules	Fatty Acyls	Fatty alcohols	Aliphatic acyclic compounds	Fatty alcohols	NA	8-Hydroxy-14,16-hentriacontanedione
meta_894	894	480.309	TRUE	0.934475	2.61757e+06	0.000506028	C23H48NO7P	-H(-)	100	HMDB0010381	LysoPC(15:0)	Lipids and lipid-like molecules	Glycerophospholipids	Glycerophosphocholines	Aliphatic acyclic compounds	1-acyl-sn-glycero-3-phosphocholines	NA	LysoPC(15:0)
meta_895	895	481.045	TRUE	0.869833	16948.4	-0.000673817	C20H18O12S	-H(-)	100	HMDB0127256	{2-[5,7-dihydroxy-2-(4-hydroxyphenyl)-4-oxo-4H-chromen-8-yl]-4,5-dihydroxyoxan-3-yl}oxidanesulfonic acid	Phenylpropanoids and polyketides	Flavonoids	Flavonoid glycosides	Aromatic heteropolycyclic compounds	Flavonoid 8-C-glycosides	NA	{2-[5,7-dihydroxy-2-(4-hydroxyphenyl)-4-oxo-4H-chromen-8-yl]-4,5-dihydroxyoxan-3-yl}oxidanesulfonic acid
meta_896	896	482.149	TRUE	0.738044	11019.3	7.6e-05	C22H29NO9S	-H(-)	100	HMDB0031943	(Z)-N-[(4-hydroxyphenyl)methyl]ethoxycarbothioamide 4'-(tri-acetylrhamnoside)	Organic oxygen compounds	Organooxygen compounds	Carbohydrates and carbohydrate conjugates	Aromatic heteromonocyclic compounds	Phenolic glycosides	NA	(Z)-N-[(4-hydroxyphenyl)methyl]ethoxycarbothioamide 4'-(tri-acetylrhamnoside)
meta_897	897	483.294	TRUE	0.820332	20406.3	0.00235873	C26H44O8	-H(-)	11	HMDB0038539	Goshonoside F1	Lipids and lipid-like molecules	Prenol lipids	Terpene glycosides	Aliphatic heteropolycyclic compounds	Diterpene glycosides	NA	Goshonoside F1
meta_898	898	483.314	TRUE	0.855107	30416.4	-0.00199012	C30H44O5	-H(-)	20	HMDB0034512	Liquoric acid	Lipids and lipid-like molecules	Prenol lipids	Triterpenoids	Aliphatic heteropolycyclic compounds	Triterpenoids	NA	Liquoric acid
meta_899	899	484.144	TRUE	0.647748	6879.3	-0.00033924	C25H27NO7S	-H(-)	100	HMDB0060596	Ketotifen-N-glucuronide	Organic oxygen compounds	Organooxygen compounds	Carbohydrates and carbohydrate conjugates	Aromatic heteropolycyclic compounds	N-glucuronides	NA	Ketotifen-N-glucuronide
meta_900	900	485.092	TRUE	0.74772	5522.06	-0.000757533	C24H22O9S	-H(-)	100	HMDB0126098	{[5-hydroxy-8-methyl-6-(2-methylpropanoyl)-2-oxo-4-phenyl-2H,8H-pyrano[2,3-f]chromen-8-yl]methoxy}sulfonic acid	Phenylpropanoids and polyketides	Neoflavonoids	Prenylated neoflavonoids	Aromatic heteropolycyclic compounds	Prenylated neoflavonoids	NA	{[5-hydroxy-8-methyl-6-(2-methylpropanoyl)-2-oxo-4-phenyl-2H,8H-pyrano[2,3-f]chromen-8-yl]methoxy}sulfonic acid
meta_901	901	487.013	TRUE	0.788139	13241.9	0.00239993	C21H12O14	-H(-)	11	HMDB0136073	8-(6-carboxy-2,3,4-trihydroxyphenoxy)-3,4,9,10-tetrahydroxy-6-oxo-6H-benzo[c]chromene-1-carboxylic acid	Phenylpropanoids and polyketides	Tannins	Hydrolyzable tannins	Aromatic heteropolycyclic compounds	Hydrolyzable tannins	NA	8-(6-carboxy-2,3,4-trihydroxyphenoxy)-3,4,9,10-tetrahydroxy-6-oxo-6H-benzo[c]chromene-1-carboxylic acid
meta_902	902	487.086	TRUE	0.699212	7479.97	0.00191554	C23H20O12	-H(-)	23	HMDB0128465	6-({13,14-dimethoxy-9-oxo-8,17-dioxatetracyclo[8.7.0.0虏,樊0鹿鹿,鹿遁heptadeca-1(10),2(7),3,5,11,13,15-heptaen-5-yl}oxy)-3,4,5-trihydroxyoxane-2-carboxylic acid	Phenylpropanoids and polyketides	Isoflavonoids	Coumestans	Aromatic heteropolycyclic compounds	Coumestans	NA	6-({13,14-dimethoxy-9-oxo-8,17-dioxatetracyclo[8.7.0.0虏,樊0鹿鹿,鹿遁heptadeca-1(10),2(7),3,5,11,13,15-heptaen-5-yl}oxy)-3,4,5-trihydroxyoxane-2-carboxylic acid
meta_903	903	488.11	TRUE	0.741337	7338.26	-0.00240747	C16H27NO14S	-H(-)	10	HMDB0060453	Chondroitin 6'-sulfate	Organic oxygen compounds	Organooxygen compounds	Carbohydrates and carbohydrate conjugates	Aliphatic heteromonocyclic compounds	N-acyl-alpha-hexosamines	NA	Chondroitin 6'-sulfate
meta_904	904	488.137	TRUE	0.719322	5278.72	0.00120589	C24H27NO8S	-H(-)	72	HMDB0060763	4-Hydroxy duloxetine glucuronide	Organic oxygen compounds	Organooxygen compounds	Carbohydrates and carbohydrate conjugates	Aromatic heteropolycyclic compounds	Phenolic glycosides	NA	4-Hydroxy duloxetine glucuronide
meta_905	905	489.066	TRUE	0.777352	12027.8	0.00188789	C22H18O13	-H(-)	24	HMDB0126144	6-({17,19-dioxo-5,7,9,20-tetraoxahexacyclo[11.7.0.0虏,鹿爱0鲁,府0船懂0鹿船鹿篙icosa-1(13),2(10),11,14(18)-tetraen-12-yl}oxy)-3,4,5-trihydroxyoxane-2-carboxylic acid	Phenylpropanoids and polyketides	Coumarins and derivatives	Furanocoumarins	Aromatic heteropolycyclic compounds	Difurocoumarocyclopentenones	NA	6-({17,19-dioxo-5,7,9,20-tetraoxahexacyclo[11.7.0.0虏,鹿爱0鲁,府0船懂0鹿船鹿篙icosa-1(13),2(10),11,14(18)-tetraen-12-yl}oxy)-3,4,5-trihydroxyoxane-2-carboxylic acid
meta_906	906	489.468	TRUE	0.833835	7882.3	-0.000767117	C33H62O2	-H(-)	100	HMDB0035956	Lumequoylacetone	Organic oxygen compounds	Organooxygen compounds	Carbonyl compounds	Aliphatic acyclic compounds	Beta-diketones	NA	Lumequoylacetone
meta_907	907	493.5	TRUE	0.771975	10109.4	-0.00142966	C33H66O2	-H(-)	50	HMDB0039537	18-Hydroxy-16-tritriacontanone	Lipids and lipid-like molecules	Fatty Acyls	Fatty alcohols	Aliphatic acyclic compounds	Long-chain fatty alcohols	NA	18-Hydroxy-16-tritriacontanone
meta_908	908	495.295	TRUE	0.802294	16377.5	0.000892232	C27H44O8	-H(-)	100	HMDB0010318	Pregnanediol-3-glucuronide	Lipids and lipid-like molecules	Steroids and steroid derivatives	Steroidal glycosides	Aliphatic heteropolycyclic compounds	Steroid glucuronide conjugates	yes	Pregnanediol-3-glucuronide
meta_909	909	498.289	TRUE	0.79727	29022.4	0.000858586	C26H45NO6S	-H(-)	100	HMDB0000874	Tauroursodeoxycholic acid	Lipids and lipid-like molecules	Steroids and steroid derivatives	Bile acids, alcohols and derivatives	Aliphatic homopolycyclic compounds	Taurinated bile acids and derivatives	yes	Tauroursodeoxycholic acid
meta_910	910	499.291	TRUE	0.791637	27568.4	-6.12e-05	C26H44O9	-H(-)	100	HMDB0014554	Mupirocin	Lipids and lipid-like molecules	Fatty Acyls	Fatty acids and conjugates	Aliphatic heteromonocyclic compounds	Medium-chain fatty acids	NA	Mupirocin
meta_911	911	501.146	TRUE	0.802649	11170	-5.39e-05	C18H30O16	-H(-)	100	HMDB0124742	6-({4,5-dihydroxy-2-methyl-6-[(3,4,5,6-tetrahydroxyoxan-2-yl)methoxy]oxan-3-yl}oxy)-3,4,5-trihydroxyoxane-2-carboxylic acid	Organic oxygen compounds	Organooxygen compounds	Carbohydrates and carbohydrate conjugates	Aliphatic heteromonocyclic compounds	Oligosaccharides	NA	6-({4,5-dihydroxy-2-methyl-6-[(3,4,5,6-tetrahydroxyoxan-2-yl)methoxy]oxan-3-yl}oxy)-3,4,5-trihydroxyoxane-2-carboxylic acid
meta_912	912	501.155	TRUE	0.688068	9969.46	-7.88e-06	C24H27ClN4O6	-H(-)	25	HMDB0060901	Clozapine glucuronide	Organoheterocyclic compounds	Benzodiazepines	Dibenzodiazepines	Aromatic heteropolycyclic compounds	Dibenzodiazepines	NA	Clozapine glucuronide
meta_913	913	503.083	TRUE	0.828854	16908.4	-0.000281602	C23H20O13	-H(-)	100	HMDB0037080	3-Methylellagic acid 8-(2-acetylrhamnoside)	Phenylpropanoids and polyketides	Tannins	Hydrolyzable tannins	Aromatic heteropolycyclic compounds	Hydrolyzable tannins	NA	3-Methylellagic acid 8-(2-acetylrhamnoside)
meta_914	914	503.139	TRUE	0.736412	10871.1	0.00119075	C21H28O14	-H(-)	74	HMDB0035486	6-Caffeoylsucrose	Phenylpropanoids and polyketides	Cinnamic acids and derivatives	Hydroxycinnamic acids and derivatives	Aromatic heteromonocyclic compounds	Coumaric acids and derivatives	NA	6-Caffeoylsucrose
meta_915	915	503.192	TRUE	0.787036	9166.82	0.000543928	C26H32O10	-H(-)	100	HMDB0031536	Myricatomentoside I	Lignans, neolignans and related compounds	Lignan glycosides	Not classified	Aromatic heteropolycyclic compounds	Lignan glycosides	NA	Myricatomentoside I
meta_916	916	503.373	TRUE	0.795825	11663.3	0.00121064	C31H52O5	-H(-)	71	HMDB0037780	Ganoderiol G	Lipids and lipid-like molecules	Prenol lipids	Triterpenoids	Aliphatic homopolycyclic compounds	Triterpenoids	NA	Ganoderiol G
meta_917	917	504.309	TRUE	0.924844	682591	0.000870591	C25H48NO7P	-H(-)	100	HMDB0011483	LysoPE(0:0/20:2(11Z,14Z))	Lipids and lipid-like molecules	Glycerophospholipids	Glycerophosphoethanolamines	Aliphatic acyclic compounds	2-acyl-sn-glycero-3-phosphoethanolamines	NA	LysoPE(0:0/20:2(11Z,14Z))
meta_918	918	505.173	TRUE	0.815752	10514.8	-0.00184957	C25H30O11	-H(-)	25	HMDB0030084	Diosbulbinoside D	Organoheterocyclic compounds	Naphthopyrans	Not classified	Aromatic heteropolycyclic compounds	Naphthopyrans	NA	Diosbulbinoside D
meta_919	919	505.223	TRUE	0.836841	14136.3	1.25e-05	C30H34O7	-H(-)	100	HMDB0129711	2-(2,4-dihydroxyphenyl)-3-(3,7-dimethylocta-2,6-dien-1-yl)-5,7-dihydroxy-6-(4-hydroxy-3-methylbut-2-en-1-yl)-4H-chromen-4-one	Phenylpropanoids and polyketides	Flavonoids	Flavones	Aromatic heteropolycyclic compounds	6-prenylated flavones	NA	2-(2,4-dihydroxyphenyl)-3-(3,7-dimethylocta-2,6-dien-1-yl)-5,7-dihydroxy-6-(4-hydroxy-3-methylbut-2-en-1-yl)-4H-chromen-4-one
meta_920	920	505.264	TRUE	0.816824	20376.8	0.00147664	C24H42O11	-H(-)	46	HMDB0038327	(3b,9R)-5-Megastigmene-3,9-diol 9-[apiosyl-(1->6)-glucoside]	Lipids and lipid-like molecules	Fatty Acyls	Fatty acyl glycosides	Aliphatic heteromonocyclic compounds	Fatty acyl glycosides	NA	(3b,9R)-5-Megastigmene-3,9-diol 9-[apiosyl-(1->6)-glucoside]
meta_921	921	507.078	TRUE	0.847746	9244.63	0.000370657	C22H20O14	-H(-)	100	HMDB0128769	3,4,5-trihydroxy-6-{[3,6,7-trihydroxy-2-(4-hydroxy-3-methoxyphenyl)-4-oxo-4H-chromen-5-yl]oxy}oxane-2-carboxylic acid	Phenylpropanoids and polyketides	Flavonoids	Flavonoid glycosides	Aromatic heteropolycyclic compounds	Flavonoid O-glucuronides	NA	3,4,5-trihydroxy-6-{[3,6,7-trihydroxy-2-(4-hydroxy-3-methoxyphenyl)-4-oxo-4H-chromen-5-yl]oxy}oxane-2-carboxylic acid
meta_922	922	507.118	TRUE	0.837714	7860.35	-0.00010006	C23H25ClN2O9	-H(-)	25	HMDB0014596	Clomocycline	Phenylpropanoids and polyketides	Tetracyclines	Not classified	Aromatic homopolycyclic compounds	Tetracyclines	NA	Clomocycline
meta_923	923	507.477	TRUE	0.70388	7081.87	0.00135971	C33H64O3	-H(-)	56	HMDB0039536	4-Hydroxy-16,18-tritriacontanedione	Lipids and lipid-like molecules	Fatty Acyls	Fatty alcohols	Aliphatic acyclic compounds	Fatty alcohols	NA	4-Hydroxy-16,18-tritriacontanedione
meta_924	924	509.094	TRUE	0.562294	14092	-0.000115437	C22H22O14	-H(-)	100	HMDB0128791	3,4,5-trihydroxy-6-{[3,6,7-trihydroxy-2-(4-hydroxy-3-methoxyphenyl)-4-oxo-3,4-dihydro-2H-1-benzopyran-5-yl]oxy}oxane-2-carboxylic acid	Phenylpropanoids and polyketides	Flavonoids	Flavonoid glycosides	Aromatic heteropolycyclic compounds	Flavonoid O-glucuronides	NA	3,4,5-trihydroxy-6-{[3,6,7-trihydroxy-2-(4-hydroxy-3-methoxyphenyl)-4-oxo-3,4-dihydro-2H-1-benzopyran-5-yl]oxy}oxane-2-carboxylic acid
meta_925	925	509.122	TRUE	0.719817	8932.14	0.00205968	C30H22O8	-H(-)	18	HMDB0034038	Palmidin A	Benzenoids	Anthracenes	Not classified	Aromatic homopolycyclic compounds	Anthracenes	NA	Palmidin A
meta_926	926	510.043	TRUE	0.825414	11826.7	0.00123993	C16H17N9O5S3	-H(-)	68	HMDB0014412	Cefmenoxime	Organoheterocyclic compounds	Lactams	Beta lactams	Aromatic heteropolycyclic compounds	Cephalosporins	NA	Cefmenoxime
meta_927	927	511.344	TRUE	0.822632	18404.5	-0.00128561	C32H48O5	-H(-)	63	HMDB0031879	11a,12a-Epoxy-3b-hydroxy-28,13-oleananolide 3-acetate	Lipids and lipid-like molecules	Prenol lipids	Triterpenoids	Aliphatic heteropolycyclic compounds	Triterpenoids	NA	11a,12a-Epoxy-3b-hydroxy-28,13-oleananolide 3-acetate
meta_928	928	512.198	TRUE	0.720489	6013.89	0.00089115	C20H35NO14	-H(-)	100	HMDB0036593	Validamycin B	Organic oxygen compounds	Organooxygen compounds	Carbohydrates and carbohydrate conjugates	Aliphatic heteromonocyclic compounds	O-glycosyl compounds	NA	Validamycin B
meta_929	929	514.149	TRUE	0.687694	5132.71	0.00151085	C21H29N3O10S	-H(-)	44	HMDB0135691	2-amino-4-({1-[(carboxymethyl)-C-hydroxycarbonimidoyl]-2-{[1-hydroxy-1-(4-hydroxy-3-methoxyphenyl)-3-oxobutan-2-yl]sulfanyl}ethyl}-C-hydroxycarbonimidoyl)butanoic acid	Organic acids and derivatives	Carboxylic acids and derivatives	Amino acids, peptides, and analogues	Aromatic homomonocyclic compounds	Peptides	NA	2-amino-4-({1-[(carboxymethyl)-C-hydroxycarbonimidoyl]-2-{[1-hydroxy-1-(4-hydroxy-3-methoxyphenyl)-3-oxobutan-2-yl]sulfanyl}ethyl}-C-hydroxycarbonimidoyl)butanoic acid
meta_930	930	514.284	TRUE	0.70042	16557.5	0.000752098	C26H45NO7S	-H(-)	100	HMDB0000036	Taurocholic acid	Lipids and lipid-like molecules	Steroids and steroid derivatives	Bile acids, alcohols and derivatives	Aliphatic homopolycyclic compounds	Trihydroxy bile acids, alcohols and derivatives	yes	Taurocholic acid
meta_931	931	515.041	TRUE	0.865738	8687.7	0.000143489	C30H12O9	-H(-)	100	HMDB0030568	Trisjuglone	Benzenoids	Phenanthrenes and derivatives	Triphenylenes	Aromatic homopolycyclic compounds	Triphenylenes	NA	Trisjuglone
meta_932	932	515.132	TRUE	0.748709	7453.92	-0.00103292	(C16H24NO14S)nC2H6	-H(-)	95	HMDB0000632	Dermatan	Organic oxygen compounds	Organooxygen compounds	Carbohydrates and carbohydrate conjugates	Aliphatic heteromonocyclic compounds	N-acyl-alpha-hexosamines	NA	Dermatan
meta_933	933	515.249	TRUE	0.751676	11376.7	0.000548677	C25H40O11	-H(-)	100	HMDB0038029	Eriojaposide B	Lipids and lipid-like molecules	Fatty Acyls	Fatty acyl glycosides	Aliphatic heteromonocyclic compounds	Fatty acyl glycosides of mono- and disaccharides	NA	Eriojaposide B
meta_934	934	517.135	TRUE	0.714003	5983.61	0.0006287	C25H26O12	-H(-)	100	HMDB0038776	Medicarpin 3-O-(6'-malonylglucoside)	Not classified	Not classified	Not classified	Not classified	Not classified	NA	Medicarpin 3-O-(6'-malonylglucoside)
meta_935	935	518.325	TRUE	0.785114	19524.5	0.0004931	C26H50NO7P	-H(-)	100	HMDB0010386	LysoPC(18:2(9Z,12Z))	Lipids and lipid-like molecules	Glycerophospholipids	Glycerophosphocholines	Aliphatic acyclic compounds	1-acyl-sn-glycero-3-phosphocholines	yes	LysoPC(18:2(9Z,12Z))
meta_936	936	519.15	TRUE	0.702579	9483.04	0.000754001	C25H28O12	-H(-)	100	HMDB0128919	3,4,5-trihydroxy-6-[(2-{9-[(3-methylbut-2-enoyl)oxy]-2-oxo-2H,8H,9H-furo[2,3-h]chromen-8-yl}propan-2-yl)oxy]oxane-2-carboxylic acid	Phenylpropanoids and polyketides	Coumarins and derivatives	Furanocoumarins	Aromatic heteropolycyclic compounds	Angular furanocoumarins	NA	3,4,5-trihydroxy-6-[(2-{9-[(3-methylbut-2-enoyl)oxy]-2-oxo-2H,8H,9H-furo[2,3-h]chromen-8-yl}propan-2-yl)oxy]oxane-2-carboxylic acid
meta_937	937	519.223	TRUE	0.850373	14650.9	0.00090683	C27H36O10	-H(-)	100	HMDB0036525	Myricanol 5-glucoside	Phenylpropanoids and polyketides	Diarylheptanoids	Cyclic diarylheptanoids	Aromatic heteropolycyclic compounds	Meta,meta-bridged biphenyls	NA	Myricanol 5-glucoside
meta_938	938	519.369	TRUE	0.789985	15250.4	0.000310226	C31H52O6	-H(-)	100	HMDB0038388	Cyclopassifloic acid B	Lipids and lipid-like molecules	Steroids and steroid derivatives	Cycloartanols and derivatives	Aliphatic homopolycyclic compounds	Cycloartanols and derivatives	NA	Cyclopassifloic acid B
meta_939	939	522.355	TRUE	0.801925	23216.3	0.00127274	C26H54NO7P	-H(-)	64	HMDB0010384	LysoPC(18:0)	Lipids and lipid-like molecules	Glycerophospholipids	Glycerophosphocholines	Aliphatic acyclic compounds	1-acyl-sn-glycero-3-phosphocholines	yes	LysoPC(18:0)
meta_940	940	522.966	TRUE	0.812746	19614.6	0.0010561	C10H15N4O15P3	-H(-)	91	HMDB0000293	Xanthosine 5-triphosphate	Nucleosides, nucleotides, and analogues	Purine nucleotides	Purine ribonucleotides	Aromatic heteropolycyclic compounds	Purine ribonucleoside triphosphates	NA	Xanthosine 5-triphosphate
meta_941	941	523.3	TRUE	0.771497	20024.1	-0.000518457	C23H40N8O6	-H(-)	100	HMDB0003577	VPGPR Enterostatin	Organic acids and derivatives	Carboxylic acids and derivatives	Amino acids, peptides, and analogues	Aliphatic heteromonocyclic compounds	Oligopeptides	NA	VPGPR Enterostatin
meta_942	942	525.28	TRUE	0.857327	36322.5	0.00054601	C24H40N5O8	-H(-)	100	HMDB0000572	Desmosine	Organic acids and derivatives	Carboxylic acids and derivatives	Tetracarboxylic acids and derivatives	Aromatic heteromonocyclic compounds	Tetracarboxylic acids and derivatives	NA	Desmosine
meta_943	943	527.12	TRUE	0.849156	9861.08	-0.000506859	C26H24O12	-H(-)	100	HMDB0127396	6-(4-{3,5-dihydroxy-8,8-dimethyl-4-oxo-4H,8H-pyrano[2,3-f]chromen-2-yl}phenoxy)-3,4,5-trihydroxyoxane-2-carboxylic acid	Phenylpropanoids and polyketides	Flavonoids	Flavonoid glycosides	Aromatic heteropolycyclic compounds	Flavonoid O-glucuronides	NA	6-(4-{3,5-dihydroxy-8,8-dimethyl-4-oxo-4H,8H-pyrano[2,3-f]chromen-2-yl}phenoxy)-3,4,5-trihydroxyoxane-2-carboxylic acid
meta_944	944	528.192	TRUE	0.808021	6853.86	0.00178439	C20H35NO15	-H(-)	28	HMDB0002060	O-6-deoxy-a-L-galactopyranosyl-(1->2)-O-b-D-galactopyranosyl-(1->3)-2-(acetylamino)-2-deoxy-D-Galactose	Lipids and lipid-like molecules	Fatty Acyls	Fatty acyl glycosides	Aliphatic heteromonocyclic compounds	Fatty acyl glycosides of mono- and disaccharides	NA	O-6-deoxy-a-L-galactopyranosyl-(1->2)-O-b-D-galactopyranosyl-(1->3)-2-(acetylamino)-2-deoxy-D-Galactose
meta_945	945	528.263	TRUE	0.782989	16000.3	0.000457054	C26H43NO8S	-H(-)	100	HMDB0002409	N-[(3a,5b,7b)-7-hydroxy-24-oxo-3-(sulfooxy)cholan-24-yl]-Glycine	Lipids and lipid-like molecules	Steroids and steroid derivatives	Bile acids, alcohols and derivatives	Aliphatic homopolycyclic compounds	Glycinated bile acids and derivatives	NA	N-[(3a,5b,7b)-7-hydroxy-24-oxo-3-(sulfooxy)cholan-24-yl]-Glycine
meta_946	946	531.115	TRUE	0.79182	9864.38	-0.000797116	C25H24O13	-H(-)	100	HMDB0030640	Biochanin A 7-(6-malonylglucoside)	Phenylpropanoids and polyketides	Isoflavonoids	Isoflavonoid O-glycosides	Aromatic heteropolycyclic compounds	Isoflavonoid O-glycosides	NA	Biochanin A 7-(6-malonylglucoside)
meta_947	947	531.165	TRUE	0.81123	17480.2	0.000849207	C30H28O9	-H(-)	100	HMDB0135067	8-[1-(2,4-dihydroxyphenyl)-2-hydroxy-3-(3-hydroxyphenyl)propyl]-2-(3-hydroxyphenyl)-3,4-dihydro-2H-1-benzopyran-3,5,7-triol	Phenylpropanoids and polyketides	Diarylheptanoids	Linear diarylheptanoids	Aromatic heteropolycyclic compounds	Linear diarylheptanoids	NA	8-[1-(2,4-dihydroxyphenyl)-2-hydroxy-3-(3-hydroxyphenyl)propyl]-2-(3-hydroxyphenyl)-3,4-dihydro-2H-1-benzopyran-3,5,7-triol
meta_948	948	533.256	TRUE	0.796556	9177.02	-0.00040691	C33H34N4O3	-H(-)	100	HMDB0031150	Pyrophaeophorbide a	Organoheterocyclic compounds	Tetrapyrroles and derivatives	Chlorins	Aromatic heteropolycyclic compounds	Chlorins	NA	Pyrophaeophorbide a
meta_949	949	535.037	TRUE	0.850955	17702.5	7.49e-05	C14H22N2O16P2	-H(-)	100	HMDB0001018	UDP-D-Xylose	Nucleosides, nucleotides, and analogues	Pyrimidine nucleotides	Pyrimidine ribonucleotides	Aromatic heteromonocyclic compounds	Pyrimidine ribonucleoside diphosphates	NA	UDP-D-Xylose
meta_950	950	535.379	TRUE	0.766204	25805.3	-0.000158712	C35H52O4	-H(-)	100	HMDB0030463	Hyperforin	Lipids and lipid-like molecules	Prenol lipids	Monoterpenoids	Aliphatic homopolycyclic compounds	Bicyclic monoterpenoids	NA	Hyperforin
meta_951	951	535.43	TRUE	0.728939	21975.9	0.00091211	C40H56	-H(-)	100	HMDB0000561	B-Carotene	Lipids and lipid-like molecules	Prenol lipids	Tetraterpenoids	Aliphatic homomonocyclic compounds	Carotenes	NA	B-Carotene
meta_952	952	537.087	TRUE	0.823668	15255.7	0.00207484	C23H22O15	-H(-)	18	HMDB0128780	6-{[3,7-dihydroxy-2-(1-hydroxy-3-methoxy-4-oxocyclohexa-2,5-dien-1-yl)-6-methoxy-4-oxo-4H-chromen-5-yl]oxy}-3,4,5-trihydroxyoxane-2-carboxylic acid	Organic oxygen compounds	Organooxygen compounds	Carbohydrates and carbohydrate conjugates	Aromatic heteropolycyclic compounds	Phenolic glycosides	NA	6-{[3,7-dihydroxy-2-(1-hydroxy-3-methoxy-4-oxocyclohexa-2,5-dien-1-yl)-6-methoxy-4-oxo-4H-chromen-5-yl]oxy}-3,4,5-trihydroxyoxane-2-carboxylic acid
meta_953	953	539.103	TRUE	0.655523	14371.6	0.00136668	C23H24O15	-H(-)	55	HMDB0128842	6-{5-[2,3-dioxo-3-(2,4,6-trihydroxy-3-methoxyphenyl)propyl]-2-hydroxy-3-methoxyphenoxy}-3,4,5-trihydroxyoxane-2-carboxylic acid	Phenylpropanoids and polyketides	Flavonoids	Flavonoid glycosides	Aromatic heteromonocyclic compounds	Flavonoid O-glycosides	NA	6-{5-[2,3-dioxo-3-(2,4,6-trihydroxy-3-methoxyphenyl)propyl]-2-hydroxy-3-methoxyphenoxy}-3,4,5-trihydroxyoxane-2-carboxylic acid
meta_954	954	539.3	TRUE	0.813945	12126.8	0.000985118	C32H44O7	-H(-)	100	HMDB0015480	Ciclesonide	Lipids and lipid-like molecules	Steroids and steroid derivatives	Pregnane steroids	Aliphatic heteropolycyclic compounds	Gluco/mineralocorticoids, progestogins and derivatives	NA	Ciclesonide
meta_955	955	539.431	TRUE	0.762028	762434	0.00078195	C32H60O6	-H(-)	100	HMDB0071246	TG(8:0/8:0/a-13:0)[rac]	Lipids and lipid-like molecules	Glycerolipids	Triradylcglycerols	Aliphatic acyclic compounds	Triacylglycerols	NA	TG(8:0/8:0/a-13:0)[rac]
meta_956	956	540.309	TRUE	0.769092	12957.3	0.000247323	C28H48NO7P	-H(-)	100	HMDB0010397	LysoPC(20:5(5Z,8Z,11Z,14Z,17Z))	Lipids and lipid-like molecules	Glycerophospholipids	Glycerophosphocholines	Aliphatic acyclic compounds	1-acyl-sn-glycero-3-phosphocholines	NA	LysoPC(20:5(5Z,8Z,11Z,14Z,17Z))
meta_957	957	541.121	TRUE	0.58612	8625.35	-0.00119322	C23H26O15	-H(-)	73	HMDB0128859	6-{[3,7-dihydroxy-2-(1-hydroxy-3-methoxy-4-oxocyclohexyl)-6-methoxy-4-oxo-4H-chromen-5-yl]oxy}-3,4,5-trihydroxyoxane-2-carboxylic acid	Organic oxygen compounds	Organooxygen compounds	Carbohydrates and carbohydrate conjugates	Aromatic heteropolycyclic compounds	Phenolic glycosides	NA	6-{[3,7-dihydroxy-2-(1-hydroxy-3-methoxy-4-oxocyclohexyl)-6-methoxy-4-oxo-4H-chromen-5-yl]oxy}-3,4,5-trihydroxyoxane-2-carboxylic acid
meta_958	958	542.325	TRUE	0.754822	15303.6	0.000174132	C28H50NO7P	-H(-)	100	HMDB0010395	LysoPC(20:4(5Z,8Z,11Z,14Z))	Not classified	Not classified	Not classified	Not classified	Not classified	yes	LysoPC(20:4(5Z,8Z,11Z,14Z))
meta_959	959	543.131	TRUE	0.635017	7271.2	-0.000975933	C30H24O10	-H(-)	100	HMDB0033422	(2S,2''S,3S,3''R,4S)-3,4',5,7-Tetrahydroxyflavan(2->7,4->8)-3,4',5,7-tetrahydroxyflavan	Phenylpropanoids and polyketides	Flavonoids	Biflavonoids and polyflavonoids	Aromatic heteropolycyclic compounds	Biflavonoids and polyflavonoids	NA	(2S,2''S,3S,3''R,4S)-3,4',5,7-Tetrahydroxyflavan(2->7,4->8)-3,4',5,7-tetrahydroxyflavan
meta_960	960	544.171	TRUE	0.767926	6760.71	-0.000307011	C27H33N2O6S2	-H(-)	100	HMDB0059960	4-{[4-(Diethylamino)phenyl](2,4-disulfophenyl)methylene}-N,N-diethyl-2,5-cyclohexadien-1-iminium	Benzenoids	Benzene and substituted derivatives	Diphenylmethanes	Aromatic homomonocyclic compounds	Diphenylmethanes	NA	4-{[4-(Diethylamino)phenyl](2,4-disulfophenyl)methylene}-N,N-diethyl-2,5-cyclohexadien-1-iminium
meta_961	961	545.082	TRUE	0.504977	18630.2	8.94e-07	C18H26O17S	-H(-)	100	HMDB0128277	[(3,4,5-trihydroxy-6-{1,2,6-trihydroxy-3-[hydroxy(3,4,5-trihydroxyoxan-2-yl)methyl]-4-oxocyclohexa-2,5-dien-1-yl}oxan-2-yl)methoxy]sulfonic acid	Organic oxygen compounds	Organooxygen compounds	Carbohydrates and carbohydrate conjugates	Aliphatic heteromonocyclic compounds	C-glycosyl compounds	NA	[(3,4,5-trihydroxy-6-{1,2,6-trihydroxy-3-[hydroxy(3,4,5-trihydroxyoxan-2-yl)methyl]-4-oxocyclohexa-2,5-dien-1-yl}oxan-2-yl)methoxy]sulfonic acid
meta_962	962	546.227	TRUE	0.720518	5648.73	0.00125935	C27H37N3O7S	-H(-)	66	HMDB0015393	Darunavir	Benzenoids	Benzene and substituted derivatives	Benzenesulfonamides	Aromatic heteropolycyclic compounds	Aminobenzenesulfonamides	NA	Darunavir
meta_963	963	547.181	TRUE	0.781092	7478.63	0.000670775	C27H32O12	-H(-)	100	HMDB0125812	6-{4-[3-(4,5-dihydroxy-7-methoxy-2,2-dimethyl-3,4-dihydro-2H-1-benzopyran-6-yl)-3-oxopropyl]phenoxy}-3,4,5-trihydroxyoxane-2-carboxylic acid	Phenylpropanoids and polyketides	Flavonoids	Flavonoid glycosides	Aromatic heteropolycyclic compounds	Flavonoid O-glycosides	NA	6-{4-[3-(4,5-dihydroxy-7-methoxy-2,2-dimethyl-3,4-dihydro-2H-1-benzopyran-6-yl)-3-oxopropyl]phenoxy}-3,4,5-trihydroxyoxane-2-carboxylic acid
meta_964	964	550.388	TRUE	0.621031	10324.5	-0.000409617	C28H58NO7P	-H(-)	100	HMDB0010390	LysoPC(20:0/0:0)	Lipids and lipid-like molecules	Glycerophospholipids	Glycerophosphocholines	Aliphatic acyclic compounds	1-acyl-sn-glycero-3-phosphocholines	NA	LysoPC(20:0/0:0)
meta_965	965	551.084	TRUE	0.657203	6392.57	-0.000849204	C27H20O13	-H(-)	100	HMDB0033288	Epitheaflagallin 3-O-gallate	Benzenoids	Benzene and substituted derivatives	Benzoic acids and derivatives	Aromatic heteropolycyclic compounds	Galloyl esters	NA	Epitheaflagallin 3-O-gallate
meta_966	966	551.374	TRUE	0.689853	10403.3	-0.000146134	C35H52O5	-H(-)	100	HMDB0033632	Furohyperforin	Lipids and lipid-like molecules	Prenol lipids	Monoterpenoids	Aliphatic heteropolycyclic compounds	Monoterpenoids	NA	Furohyperforin
meta_967	967	555.209	TRUE	0.803791	13040.5	-0.000403755	C26H36O13	-H(-)	100	HMDB0035036	Glaucarubolone 15-O-beta-D-glucopyranoside	Lipids and lipid-like molecules	Prenol lipids	Terpene lactones	Aliphatic heteropolycyclic compounds	Quassinoids	NA	Glaucarubolone 15-O-beta-D-glucopyranoside
meta_968	968	557.06	TRUE	0.78265	16074.2	0.000683757	C22H22O15S	-H(-)	100	HMDB0037333	8-Hydroxyluteolin 4'-methyl ether 8-glucoside-3'-sulfate	Phenylpropanoids and polyketides	Flavonoids	Flavonoid glycosides	Aromatic heteropolycyclic compounds	Flavonoid-8-O-glycosides	NA	8-Hydroxyluteolin 4'-methyl ether 8-glucoside-3'-sulfate
meta_969	969	561.051	TRUE	0.836801	13439.7	0.0021712	C16H24N2O16P2	-H(-)	15	HMDB0062805	DTDP-alpha-D-glucose(2-)	Nucleosides, nucleotides, and analogues	Pyrimidine nucleotides	Pyrimidine nucleotide sugars	Aromatic heteromonocyclic compounds	Pyrimidine nucleotide sugars	NA	DTDP-alpha-D-glucose(2-)
meta_970	970	561.154	TRUE	0.77469	6892.15	-0.000624901	C28H31ClO10	-H(-)	25	HMDB0034093	Physalin H	Lipids and lipid-like molecules	Steroids and steroid derivatives	Physalins and derivatives	Aliphatic heteropolycyclic compounds	Physalins and derivatives	NA	Physalin H
meta_971	971	561.452	TRUE	0.798713	14522	7.41e-05	C35H62O5	-H(-)	100	HMDB0007017	DG(14:0/18:3(6Z,9Z,12Z)/0:0)	Lipids and lipid-like molecules	Fatty Acyls	Lineolic acids and derivatives	Aliphatic acyclic compounds	Lineolic acids and derivatives	NA	DG(14:0/18:3(6Z,9Z,12Z)/0:0)
meta_972	972	562.292	TRUE	0.665885	10076.7	0.00194322	C30H46NO7P	-H(-)	22	HMDB0014635	Fosinopril	Organic acids and derivatives	Carboxylic acids and derivatives	Amino acids, peptides, and analogues	Aromatic heteromonocyclic compounds	Proline and derivatives	NA	Fosinopril
meta_973	973	563.07	TRUE	0.838899	7929.91	-0.00169201	C16H26N2O16P2	-H(-)	33	HMDB0001328	dTDP-D-glucose	Nucleosides, nucleotides, and analogues	Pyrimidine nucleotides	Pyrimidine nucleotide sugars	Aromatic heteromonocyclic compounds	Pyrimidine nucleotide sugars	NA	dTDP-D-glucose
meta_974	974	565.3	TRUE	0.763055	11660.9	0.000848235	C30H51BrN2O3	-H(-)	25	HMDB0060709	17-Desacetyl-rocuronium	Lipids and lipid-like molecules	Steroids and steroid derivatives	Androstane steroids	Not classified	Androgens and derivatives	NA	17-Desacetyl-rocuronium
meta_975	975	565.318	TRUE	0.743594	9336.47	-0.00125464	C34H46O7	-H(-)	66	HMDB0041367	25-Cinnamoyl-vulgaroside	Lipids and lipid-like molecules	Prenol lipids	Sesterterpenoids	Aromatic heteropolycyclic compounds	Cheilanthane sesterterpenoids	NA	25-Cinnamoyl-vulgaroside
meta_976	976	567.316	TRUE	0.764686	15377.2	0.0010537	C30H48O10	-H(-)	92	HMDB0002430	(3a,5b,7a)-23-Carboxy-7-hydroxy-24-norcholan-3-yl-b-D-Glucopyranosiduronic acid	Lipids and lipid-like molecules	Steroids and steroid derivatives	Steroidal glycosides	Aliphatic heteropolycyclic compounds	Steroid glucuronide conjugates	NA	(3a,5b,7a)-23-Carboxy-7-hydroxy-24-norcholan-3-yl-b-D-Glucopyranosiduronic acid
meta_977	977	567.42	TRUE	0.746532	14045.8	0.000739339	C40H56O2	-H(-)	100	HMDB0002198	(3R,3'R,6'R,9-cis)-beta,epsilon-Carotene-3,3'-diol	Lipids and lipid-like molecules	Prenol lipids	Tetraterpenoids	Aliphatic homomonocyclic compounds	Xanthophylls	NA	(3R,3'R,6'R,9-cis)-beta,epsilon-Carotene-3,3'-diol
meta_978	978	573.414	TRUE	0.728661	19360.7	0.00158954	C35H58O6	-H(-)	39	HMDB0029768	Isofucosterol glucoside	Lipids and lipid-like molecules	Steroids and steroid derivatives	Stigmastanes and derivatives	Aliphatic heteropolycyclic compounds	Stigmastanes and derivatives	NA	Isofucosterol glucoside
meta_979	979	573.452	TRUE	0.779548	551315	0.000653419	C36H62O5	-H(-)	100	HMDB0007077	DG(15:0/18:4(6Z,9Z,12Z,15Z)/0:0)	Lipids and lipid-like molecules	Fatty Acyls	Lineolic acids and derivatives	Aliphatic acyclic compounds	Lineolic acids and derivatives	NA	DG(15:0/18:4(6Z,9Z,12Z,15Z)/0:0)
meta_980	980	574.389	TRUE	0.752403	10177.5	-0.00112212	C30H58NO7P	-H(-)	82	HMDB0010400	LysoPC(22:2(13Z,16Z))	Lipids and lipid-like molecules	Glycerophospholipids	Glycerophosphocholines	Aliphatic acyclic compounds	1-acyl-sn-glycero-3-phosphocholines	NA	LysoPC(22:2(13Z,16Z))
meta_981	981	577.448	TRUE	0.855169	21474.3	-0.000555443	C35H62O6	-H(-)	100	HMDB0029957	Squamocin K	Lipids and lipid-like molecules	Fatty Acyls	Fatty alcohols	Aliphatic heteromonocyclic compounds	Annonaceous acetogenins	NA	Squamocin K
meta_982	982	580.257	TRUE	0.851109	14834.3	-0.000904756	C33H35N5O5	-H(-)	100	HMDB0014834	Ergotamine	Alkaloids and derivatives	Ergoline and derivatives	Lysergic acids and derivatives	Aromatic heteropolycyclic compounds	Ergotamines, dihydroergotamines, and derivatives	NA	Ergotamine
meta_983	983	581.477	TRUE	0.806995	19009	0.00171859	C35H66O6	-H(-)	31	HMDB0071228	TG(8:0/14:0/10:0)	Lipids and lipid-like molecules	Glycerolipids	Triradylcglycerols	Aliphatic acyclic compounds	Triacylglycerols	NA	TG(8:0/14:0/10:0)
meta_984	984	583.165	TRUE	0.811984	39686.3	-0.000978913	C30H32O10S	-H(-)	100	HMDB0129848	{[8-(2,4-dihydroxyphenyl)-7-(3,7-dimethylocta-2,6-dien-1-yl)-5-hydroxy-2-methyl-6-oxo-2H,6H-pyrano[3,2-g]chromen-2-yl]methoxy}sulfonic acid	Phenylpropanoids and polyketides	Flavonoids	Flavones	Aromatic heteropolycyclic compounds	3-prenylated flavones	NA	{[8-(2,4-dihydroxyphenyl)-7-(3,7-dimethylocta-2,6-dien-1-yl)-5-hydroxy-2-methyl-6-oxo-2H,6H-pyrano[3,2-g]chromen-2-yl]methoxy}sulfonic acid
meta_985	985	586.22	TRUE	0.834951	8952.79	-0.00136659	C23H43NO12P2	-H(-)	55	HMDB0001445	N-Acetyl-D-glucosaminyldiphosphodolichol	Organic oxygen compounds	Organooxygen compounds	Carbohydrates and carbohydrate conjugates	Aliphatic heteromonocyclic compounds	N-acyl-alpha-hexosamines	NA	N-Acetyl-D-glucosaminyldiphosphodolichol
meta_986	986	589.303	TRUE	0.817965	15046.7	0.000547749	C33H42N4O6	-H(-)	100	HMDB0004158	D-Urobilinogen	Organoheterocyclic compounds	Tetrapyrroles and derivatives	Bilirubins	Aromatic heteromonocyclic compounds	Bilirubins	NA	D-Urobilinogen
meta_987	987	589.386	TRUE	0.802755	12222.8	0.00113203	C31H59O8P	-H(-)	81	HMDB0114795	PA(14:1(9Z)/14:0)	Lipids and lipid-like molecules	Glycerophospholipids	Glycerophosphates	Aliphatic acyclic compounds	1,2-diacylglycerol-3-phosphates	NA	PA(14:1(9Z)/14:0)
meta_988	988	591.318	TRUE	0.770462	13461.2	0.00122509	C33H44N4O6	-H(-)	70	HMDB0001898	Mesobilirubinogen	Organoheterocyclic compounds	Tetrapyrroles and derivatives	Bilirubins	Aromatic heteromonocyclic compounds	Bilirubins	NA	Mesobilirubinogen
meta_989	989	593.333	TRUE	0.778435	19456.9	0.00122514	C33H46N4O6	-H(-)	70	HMDB0004159	L-Urobilin	Organoheterocyclic compounds	Tetrapyrroles and derivatives	Bilirubins	Aromatic heteromonocyclic compounds	Bilirubins	yes	L-Urobilin
meta_990	990	593.386	TRUE	0.832293	21735.2	-0.00124263	C37H54O6	-H(-)	68	HMDB0039140	Hericenone E	Lipids and lipid-like molecules	Fatty Acyls	Lineolic acids and derivatives	Aromatic homomonocyclic compounds	Lineolic acids and derivatives	NA	Hericenone E
meta_991	991	594.123	TRUE	0.924106	712460	-0.000594688	C26H27O16	-H(-)	49	HMDB0127912	6-(4-{5,7-dihydroxy-3-[(3,4,5-trihydroxyoxan-2-yl)oxy]-5H-chromen-2-yl}-2-hydroxyphenoxy)-3,4,5-trihydroxyoxane-2-carboxylic acid	Organic oxygen compounds	Organooxygen compounds	Carbohydrates and carbohydrate conjugates	Aromatic heteropolycyclic compounds	Phenolic glycosides	NA	6-(4-{5,7-dihydroxy-3-[(3,4,5-trihydroxyoxan-2-yl)oxy]-5H-chromen-2-yl}-2-hydroxyphenoxy)-3,4,5-trihydroxyoxane-2-carboxylic acid
meta_992	992	595.385	TRUE	0.795819	23234.4	-0.000275509	C33H56O9	-H(-)	100	HMDB0029315	Asparagoside B	Lipids and lipid-like molecules	Steroids and steroid derivatives	Steroidal glycosides	Aliphatic heteropolycyclic compounds	Steroidal saponins	NA	Asparagoside B
meta_993	993	595.458	TRUE	0.775693	65924.1	0.000137278	C35H64O7	-H(-)	100	HMDB0031395	Muricatetrocin C	Lipids and lipid-like molecules	Fatty Acyls	Fatty alcohols	Aliphatic heteromonocyclic compounds	Annonaceous acetogenins	NA	Muricatetrocin C
meta_994	994	595.494	TRUE	0.771336	2.0298e+06	0.00066899	C36H68O6	-H(-)	100	HMDB0031089	Glycerol triundecanoate	Lipids and lipid-like molecules	Glycerolipids	Triradylcglycerols	Aliphatic acyclic compounds	Triacylglycerols	NA	Glycerol triundecanoate
meta_995	995	597.392	TRUE	0.788776	14260.7	-0.00114413	C35H54N2O6	-H(-)	79	HMDB0038567	3'-N-Acetyl-4'-O-(9-octadecenoyl)fusarochromanone	Organoheterocyclic compounds	Benzopyrans	1-benzopyrans	Aromatic heteropolycyclic compounds	2,2-dimethyl-1-benzopyrans	NA	3'-N-Acetyl-4'-O-(9-octadecenoyl)fusarochromanone
meta_996	996	601.352	TRUE	0.751513	9467.27	0.00139414	C38H50O6	-H(-)	53	HMDB0029485	(+)-Isoxanthochymol	Lipids and lipid-like molecules	Prenol lipids	Monoterpenoids	Aromatic heteropolycyclic compounds	Aromatic monoterpenoids	NA	(+)-Isoxanthochymol
meta_997	997	602.055	TRUE	0.735267	51939.6	-0.000951064	C16H23N5O16P2	-H(-)	100	HMDB0062759	GDP-alpha-D-mannose(2-)	Nucleosides, nucleotides, and analogues	Purine nucleotides	Purine nucleotide sugars	Aromatic heteropolycyclic compounds	Purine nucleotide sugars	NA	GDP-alpha-D-mannose(2-)
meta_998	998	603.388	TRUE	0.720445	8902.59	0.00225291	C35H56O8	-H(-)	13	HMDB0040498	3-Epipapyriferic acid	Lipids and lipid-like molecules	Prenol lipids	Terpene glycosides	Aliphatic heteropolycyclic compounds	Triterpene saponins	NA	3-Epipapyriferic acid
meta_999	999	603.425	TRUE	0.761044	14247.8	0.00137846	C36H60O7	-H(-)	54	HMDB0036060	Hebevinoside IV	Lipids and lipid-like molecules	Steroids and steroid derivatives	Steroidal glycosides	Aliphatic heteropolycyclic compounds	Cucurbitacin glycosides	NA	Hebevinoside IV
meta_1000	1000	603.497	TRUE	0.766811	10958.9	0.00210329	C38H68O5	-H(-)	17	HMDB0007081	DG(15:0/20:3(5Z,8Z,11Z)/0:0)	Lipids and lipid-like molecules	Glycerolipids	Diradylglycerols	Aliphatic acyclic compounds	1,2-diacylglycerols	NA	DG(15:0/20:3(5Z,8Z,11Z)/0:0)
meta_1001	1001	607.108	TRUE	0.681599	13633.3	0.00176377	C30H24O14	-H(-)	29	HMDB0036336	Prodelphinidin A1	Phenylpropanoids and polyketides	Flavonoids	Biflavonoids and polyflavonoids	Aromatic heteropolycyclic compounds	Biflavonoids and polyflavonoids	NA	Prodelphinidin A1
meta_1002	1002	609.105	TRUE	0.658701	8985.71	0.00192241	C30H26O12S	-H(-)	23	HMDB0135136	(3-{3,7-dihydroxy-4-[3,5,7-trihydroxy-2-(3-hydroxyphenyl)-3,4-dihydro-2H-1-benzopyran-8-yl]-3,4-dihydro-2H-1-benzopyran-2-yl}phenyl)oxidanesulfonic acid	Phenylpropanoids and polyketides	Flavonoids	Biflavonoids and polyflavonoids	Aromatic heteropolycyclic compounds	Biflavonoids and polyflavonoids	NA	(3-{3,7-dihydroxy-4-[3,5,7-trihydroxy-2-(3-hydroxyphenyl)-3,4-dihydro-2H-1-benzopyran-8-yl]-3,4-dihydro-2H-1-benzopyran-2-yl}phenyl)oxidanesulfonic acid
meta_1003	1003	609.145	TRUE	0.520988	6193.45	0.00125759	C27H30O16	-H(-)	66	HMDB0003249	Rutin	Phenylpropanoids and polyketides	Flavonoids	Flavonoid glycosides	Aromatic heteropolycyclic compounds	Flavonoid-3-O-glycosides	NA	Rutin
meta_1004	1004	609.183	TRUE	0.802299	6166.57	-0.000355864	C28H34O15	-H(-)	100	HMDB0003265	Hesperidin	Phenylpropanoids and polyketides	Flavonoids	Flavonoid glycosides	Aromatic heteropolycyclic compounds	Flavonoid-7-O-glycosides	NA	Hesperidin
meta_1005	1005	611.126	TRUE	0.732742	7205.84	-0.00107764	C26H28O17	-H(-)	88	HMDB0132733	6-[4-(3-{[3,4-dihydroxy-5-(hydroxymethyl)oxolan-2-yl]oxy}-5,7-dihydroxy-4-oxo-3,4-dihydro-2H-1-benzopyran-2-yl)-2-hydroxyphenoxy]-3,4,5-trihydroxyoxane-2-carboxylic acid	Phenylpropanoids and polyketides	Flavonoids	Flavonoid glycosides	Aromatic heteropolycyclic compounds	Flavonoid O-glucuronides	NA	6-[4-(3-{[3,4-dihydroxy-5-(hydroxymethyl)oxolan-2-yl]oxy}-5,7-dihydroxy-4-oxo-3,4-dihydro-2H-1-benzopyran-2-yl)-2-hydroxyphenoxy]-3,4,5-trihydroxyoxane-2-carboxylic acid
meta_1006	1006	612.226	TRUE	0.736429	5675.69	-0.00180899	C35H35NO9	-H(-)	27	HMDB0040767	Neoacrimarine E	Organoheterocyclic compounds	Quinolines and derivatives	Benzoquinolines	Aromatic heteropolycyclic compounds	Acridones	NA	Neoacrimarine E
meta_1007	1007	613.157	TRUE	0.759733	7239.33	-0.00121076	C30H30O14	-H(-)	71	HMDB0034052	Safflomin C	Phenylpropanoids and polyketides	Diarylheptanoids	Linear diarylheptanoids	Aromatic heteromonocyclic compounds	Curcuminoids	NA	Safflomin C
meta_1008	1008	617.405	TRUE	0.777296	7635.93	0.000679441	C36H58O8	-H(-)	100	HMDB0034374	19-Methoxypomolic acid 3-arabinoside	Lipids and lipid-like molecules	Prenol lipids	Triterpenoids	Aliphatic heteropolycyclic compounds	Triterpenoids	NA	19-Methoxypomolic acid 3-arabinoside
meta_1009	1009	617.515	TRUE	0.649932	7588.33	0.00046036	C39H70O5	-H(-)	100	HMDB0007059	DG(14:1(9Z)/22:2(13Z,16Z)/0:0)	Lipids and lipid-like molecules	Glycerolipids	Diradylglycerols	Aliphatic acyclic compounds	1,2-diacylglycerols	NA	DG(14:1(9Z)/22:2(13Z,16Z)/0:0)
meta_1010	1010	619.058	TRUE	0.725153	7363.08	-9.81e-05	C26H20O18	-H(-)	100	HMDB0005790	Tannin	Phenylpropanoids and polyketides	Tannins	Hydrolyzable tannins	Not classified	Hydrolyzable tannins	NA	Tannin
meta_1011	1011	619.288	TRUE	0.851174	38504	0.000593722	C29H49O12P	-H(-)	100	HMDB0061690	1-Arachidonoylglycerophosphoinositol	Lipids and lipid-like molecules	Glycerophospholipids	Glycerophosphoinositols	Aliphatic homomonocyclic compounds	1-acyl-sn-glycerol-3-phosphoinositols	yes	1-Arachidonoylglycerophosphoinositol
meta_1012	1012	619.457	TRUE	0.680438	8509.83	0.000963043	C37H64O7	-H(-)	100	HMDB0031228	Mosinone A	Lipids and lipid-like molecules	Fatty Acyls	Fatty alcohols	Aliphatic heteromonocyclic compounds	Long-chain fatty alcohols	NA	Mosinone A
meta_1013	1013	621.344	TRUE	0.719144	8037.64	-0.000322531	C37H50O8	-H(-)	100	HMDB0029625	3-O-Protocatechuoylceanothic acid	Lipids and lipid-like molecules	Prenol lipids	Triterpenoids	Aromatic homopolycyclic compounds	Triterpenoids	NA	3-O-Protocatechuoylceanothic acid
meta_1014	1014	621.473	TRUE	0.648199	9585.81	0.000210937	C37H66O7	-H(-)	100	HMDB0029958	Asitribin	Lipids and lipid-like molecules	Fatty Acyls	Fatty alcohols	Aliphatic heteromonocyclic compounds	Annonaceous acetogenins	NA	Asitribin
meta_1015	1015	621.545	TRUE	0.681874	5551.94	0.00109577	C39H74O5	-H(-)	86	HMDB0007029	DG(14:0/22:1(13Z)/0:0)	Lipids and lipid-like molecules	Glycerolipids	Diradylglycerols	Aliphatic acyclic compounds	1,2-diacylglycerols	NA	DG(14:0/22:1(13Z)/0:0)
meta_1016	1016	623.314	TRUE	0.774595	12098.1	-0.00179482	C38H44N2O6	-H(-)	28	HMDB0034104	Neferine	Organoheterocyclic compounds	Isoquinolines and derivatives	Benzylisoquinolines	Aromatic heteropolycyclic compounds	Benzylisoquinolines	NA	Neferine
meta_1017	1017	624.455	TRUE	0.710002	9266.69	-0.00131026	C36H70CoO4	-H(-)	15	HMDB0062435	9,10-12,13-diepoxy-octadecanoate	Lipids and lipid-like molecules	Fatty Acyls	Fatty acids and conjugates	Not classified	Long-chain fatty acids	NA	9,10-12,13-diepoxy-octadecanoate
meta_1018	1018	625.106	TRUE	0.803365	12145.5	-0.000937963	C26H26O18	-H(-)	100	HMDB0034258	Amritoside	Phenylpropanoids and polyketides	Tannins	Hydrolyzable tannins	Aromatic heteropolycyclic compounds	Hydrolyzable tannins	NA	Amritoside
meta_1019	1019	627.136	TRUE	0.472351	123214	-0.000829011	C30H28O15	-H(-)	100	HMDB0124849	6-{4-[12-(3,4-dihydroxyphenyl)-8,13-dihydroxy-4-oxo-3,11-dioxatricyclo[8.4.0.0虏,份tetradeca-1(10),2(7),8-trien-6-yl]-2-hydroxyphenoxy}-3,4,5-trihydroxyoxane-2-carboxylic acid	Phenylpropanoids and polyketides	Flavonoids	Flavans	Aromatic heteropolycyclic compounds	Catechins	NA	6-{4-[12-(3,4-dihydroxyphenyl)-8,13-dihydroxy-4-oxo-3,11-dioxatricyclo[8.4.0.0虏,份tetradeca-1(10),2(7),8-trien-6-yl]-2-hydroxyphenoxy}-3,4,5-trihydroxyoxane-2-carboxylic acid
meta_1020	1020	629.261	TRUE	0.76949	6615.55	0.00118304	C34H38N4O8	-H(-)	74	HMDB0040917	Brassica napus non-fluorescent chlorophyll catabolite 3	Organoheterocyclic compounds	Tetrapyrroles and derivatives	Not classified	Aromatic heteropolycyclic compounds	Tetrapyrroles and derivatives	NA	Brassica napus non-fluorescent chlorophyll catabolite 3
meta_1021	1021	631.095	TRUE	0.678524	10252.5	-0.000889376	C28H24O17	-H(-)	100	HMDB0035463	Myricetin 7-(6''-galloylglucoside)	Phenylpropanoids and polyketides	Flavonoids	Flavonoid glycosides	Aromatic heteropolycyclic compounds	Flavonoid-7-O-glycosides	NA	Myricetin 7-(6''-galloylglucoside)
meta_1022	1022	631.554	TRUE	0.208585	7604.81	-0.00200732	C37H76O7	-H(-)	20	HMDB0032300	Glyceryl palmitostearate	Lipids and lipid-like molecules	Fatty Acyls	Fatty acids and conjugates	Not classified	Hydroxy fatty acids	NA	Glyceryl palmitostearate
meta_1023	1023	632.204	TRUE	0.575483	8007.53	0.000412442	C23H39NO19	-H(-)	100	HMDB0000825	3'-Sialyllactose	Organic oxygen compounds	Organooxygen compounds	Carbohydrates and carbohydrate conjugates	Aliphatic heteromonocyclic compounds	N-acylneuraminic acids	NA	3'-Sialyllactose
meta_1024	1024	632.431	TRUE	0.739107	5846.71	-0.00135453	C33H64NO8P	-H(-)	57	HMDB0008822	PE(14:0/14:1(9Z))	Lipids and lipid-like molecules	Glycerophospholipids	Glycerophosphoethanolamines	Aliphatic acyclic compounds	Phosphatidylethanolamines	NA	PE(14:0/14:1(9Z))
meta_1025	1025	633.223	TRUE	0.775599	5682.69	0.00213879	C24H42O19	-H(-)	16	HMDB0006587	Lactodifucotetraose	Lipids and lipid-like molecules	Fatty Acyls	Fatty acyl glycosides	Aliphatic heteromonocyclic compounds	Fatty acyl glycosides of mono- and disaccharides	NA	Lactodifucotetraose
meta_1026	1026	633.4	TRUE	0.709249	7053.75	0.00107942	C36H58O9	-H(-)	88	HMDB0029606	Maslinic acid 3-O-b-D-glucoside	Lipids and lipid-like molecules	Prenol lipids	Terpene glycosides	Aliphatic heteropolycyclic compounds	Triterpene saponins	NA	Maslinic acid 3-O-b-D-glucoside
meta_1027	1027	635.56	TRUE	0.612603	6065.85	0.00156208	C40H76O5	-H(-)	40	HMDB0007087	DG(15:0/22:1(13Z)/0:0)	Lipids and lipid-like molecules	Glycerolipids	Diradylglycerols	Aliphatic acyclic compounds	1,2-diacylglycerols	NA	DG(15:0/22:1(13Z)/0:0)
meta_1028	1028	641.157	TRUE	0.771861	11284.6	0.000373645	C24H34O20	-H(-)	100	HMDB0128268	6-({4,5-dihydroxy-2-[hydroxy({2,3,4-trihydroxy-6-oxo-3-[3,4,5-trihydroxy-6-(hydroxymethyl)oxan-2-yl]cyclohexa-1,4-dien-1-yl})methyl]oxan-3-yl}oxy)-3,4,5-trihydroxyoxane-2-carboxylic acid	Organic oxygen compounds	Organooxygen compounds	Carbohydrates and carbohydrate conjugates	Aliphatic heteromonocyclic compounds	O-glucuronides	NA	6-({4,5-dihydroxy-2-[hydroxy({2,3,4-trihydroxy-6-oxo-3-[3,4,5-trihydroxy-6-(hydroxymethyl)oxan-2-yl]cyclohexa-1,4-dien-1-yl})methyl]oxan-3-yl}oxy)-3,4,5-trihydroxyoxane-2-carboxylic acid
meta_1029	1029	641.513	TRUE	0.710149	8528.31	0.0019346	C41H70O5	-H(-)	22	HMDB0007119	DG(16:0/22:5(4Z,7Z,10Z,13Z,16Z)/0:0)	Lipids and lipid-like molecules	Glycerolipids	Diradylglycerols	Aliphatic acyclic compounds	1,2-diacylglycerols	NA	DG(16:0/22:5(4Z,7Z,10Z,13Z,16Z)/0:0)
meta_1030	1030	642.176	TRUE	0.735538	5582.11	0.00049224	C30H33N3O11S	-H(-)	100	HMDB0126127	2-amino-4-({1-[(carboxymethyl)-C-hydroxycarbonimidoyl]-2-({5,9-dihydroxy-8,8-dimethyl-2-oxo-4-phenyl-2H,8H,9H,10H-pyrano[2,3-h]chromen-10-yl}sulfanyl)ethyl}-C-hydroxycarbonimidoyl)butanoic acid	Organic acids and derivatives	Carboxylic acids and derivatives	Amino acids, peptides, and analogues	Aromatic heteropolycyclic compounds	Peptides	NA	2-amino-4-({1-[(carboxymethyl)-C-hydroxycarbonimidoyl]-2-({5,9-dihydroxy-8,8-dimethyl-2-oxo-4-phenyl-2H,8H,9H,10H-pyrano[2,3-h]chromen-10-yl}sulfanyl)ethyl}-C-hydroxycarbonimidoyl)butanoic acid
meta_1031	1031	644.36	TRUE	0.716286	6126.09	-0.000436154	C39H51NO7	-H(-)	100	HMDB0030530	Janthitrem F	Organoheterocyclic compounds	Naphthopyrans	Not classified	Aromatic heteropolycyclic compounds	Naphthopyrans	NA	Janthitrem F
meta_1032	1032	647.378	TRUE	0.800454	8053.06	0.00233482	C36H56O10	-H(-)	12	HMDB0034642	Phytolaccoside A	Lipids and lipid-like molecules	Prenol lipids	Triterpenoids	Aliphatic heteropolycyclic compounds	Triterpenoids	NA	Phytolaccoside A
meta_1033	1033	647.418	TRUE	0.778875	7028.48	-0.00158245	C37H60O9	-H(-)	39	HMDB0036430	Momordicoside K	Lipids and lipid-like molecules	Prenol lipids	Terpene glycosides	Aliphatic heteropolycyclic compounds	Triterpene glycosides	NA	Momordicoside K
meta_1034	1034	648.459	TRUE	0.763594	6490.22	0.00207828	C34H68NO8P	-H(-)	18	HMDB0008823	PE(14:0/15:0)	Lipids and lipid-like molecules	Glycerophospholipids	Glycerophosphoethanolamines	Aliphatic acyclic compounds	Phosphatidylethanolamines	NA	PE(14:0/15:0)
meta_1035	1035	651.193	TRUE	0.808056	8270.81	-0.000287483	C30H36O16	-H(-)	100	HMDB0035439	3',4',5'-Trimethoxytricetin 7-[rhamnosyl-(1->6)-glucoside]	Phenylpropanoids and polyketides	Flavonoids	Flavonoid glycosides	Aromatic heteropolycyclic compounds	Flavonoid-7-O-glycosides	NA	3',4',5'-Trimethoxytricetin 7-[rhamnosyl-(1->6)-glucoside]
meta_1036	1036	651.556	TRUE	0.755264	6902.91	0.00113049	C40H76O6	-H(-)	81	HMDB0064779	TG(i-21:0/8:0/8:0)	Lipids and lipid-like molecules	Glycerolipids	Triradylcglycerols	Aliphatic acyclic compounds	Triacylglycerols	NA	TG(i-21:0/8:0/8:0)
meta_1037	1037	657.254	TRUE	0.821229	10331.5	-0.00119738	C30H38N6O11	-H(-)	73	HMDB0059795	Gluten exorphin B5	Organic acids and derivatives	Carboxylic acids and derivatives	Amino acids, peptides, and analogues	Aromatic heteropolycyclic compounds	Tyrosine and derivatives	NA	Gluten exorphin B5
meta_1038	1038	657.448	TRUE	0.69493	9066.09	0.00187516	C36H67O8P	-H(-)	24	HMDB0114815	PA(15:0/18:2(9Z,12Z))	Lipids and lipid-like molecules	Glycerophospholipids	Glycerophosphates	Aliphatic acyclic compounds	1,2-diacylglycerol-3-phosphates	NA	PA(15:0/18:2(9Z,12Z))
meta_1039	1039	663.609	TRUE	-0.00281526	13383.5	-0.000717123	C46H80O2	-H(-)	100	HMDB0036288	Campesteryl elaidate	Lipids and lipid-like molecules	Steroids and steroid derivatives	Steroid esters	Aliphatic homopolycyclic compounds	Steroid esters	NA	Campesteryl elaidate
meta_1040	1040	665.188	TRUE	0.754443	10659.1	-0.000581665	C34H34O14	-H(-)	100	HMDB0126270	6-[4-(6-carboxy-5-{4-[(E)-2-(2,4-dihydroxyphenyl)ethenyl]-2,6-dihydroxyphenyl}-3-methylcyclohex-3-en-1-yl)-3-hydroxyphenoxy]-3,4,5-trihydroxyoxane-2-carboxylic acid	Phenylpropanoids and polyketides	Stilbenes	Stilbene glycosides	Aromatic heteromonocyclic compounds	Stilbene glycosides	NA	6-[4-(6-carboxy-5-{4-[(E)-2-(2,4-dihydroxyphenyl)ethenyl]-2,6-dihydroxyphenyl}-3-methylcyclohex-3-en-1-yl)-3-hydroxyphenoxy]-3,4,5-trihydroxyoxane-2-carboxylic acid
meta_1041	1041	665.213	TRUE	0.633681	9432.7	0.00197198	C24H42O21	-H(-)	21	HMDB0000757	Glycogen	Organic oxygen compounds	Organooxygen compounds	Carbohydrates and carbohydrate conjugates	Aliphatic heteromonocyclic compounds	Oligosaccharides	NA	Glycogen
meta_1042	1042	666.271	TRUE	0.732696	7835.64	0.000298887	C39H41NO9	-H(-)	100	HMDB0040385	Neoacrimarine B	Organoheterocyclic compounds	Quinolines and derivatives	Benzoquinolines	Aromatic heteropolycyclic compounds	Acridones	NA	Neoacrimarine B
meta_1043	1043	669.166	TRUE	0.78999	7994.19	0.00127875	C29H34O18	-H(-)	64	HMDB0037469	Spinacetin 3-gentiobioside	Phenylpropanoids and polyketides	Flavonoids	Flavonoid glycosides	Aromatic heteropolycyclic compounds	Flavonoid-3-O-glycosides	NA	Spinacetin 3-gentiobioside
meta_1044	1044	673.593	TRUE	0.0361499	25464.5	-0.000179791	C47H78O2	-H(-)	65	HMDB0006736	CE(20:3(8Z,11Z,14Z))	Lipids and lipid-like molecules	Steroids and steroid derivatives	Steroid esters	Aliphatic homopolycyclic compounds	Cholesteryl esters	NA	CE(20:3(8Z,11Z,14Z))
meta_1045	1045	677.424	TRUE	0.689995	9804.49	-0.000566006	C33H62N2O12	-H(-)	100	HMDB0060814	Descladinose roxithromycin	Organic oxygen compounds	Organooxygen compounds	Carbohydrates and carbohydrate conjugates	Aliphatic heteromonocyclic compounds	Aminoglycosides	NA	Descladinose roxithromycin
meta_1046	1046	678.396	TRUE	0.59179	10635.2	0.00233374	C36H53N7O6	-H(-)	12	HMDB0015616	Telaprevir	Organic acids and derivatives	Peptidomimetics	Hybrid peptides	Aromatic heteropolycyclic compounds	Hybrid peptides	NA	Telaprevir
meta_1047	1047	679.238	TRUE	0.604821	12991.8	0.00129371	C36H40O13	-H(-)	62	HMDB0129845	6-{4-[3-(3,7-dimethylocta-2,6-dien-1-yl)-5-hydroxy-8-(hydroxymethyl)-8-methyl-4-oxo-4H,8H-pyrano[3,2-g]chromen-2-yl]-3-hydroxyphenoxy}-3,4,5-trihydroxyoxane-2-carboxylic acid	Phenylpropanoids and polyketides	Flavonoids	Flavonoid glycosides	Aromatic heteropolycyclic compounds	Flavonoid O-glucuronides	NA	6-{4-[3-(3,7-dimethylocta-2,6-dien-1-yl)-5-hydroxy-8-(hydroxymethyl)-8-methyl-4-oxo-4H,8H-pyrano[3,2-g]chromen-2-yl]-3-hydroxyphenoxy}-3,4,5-trihydroxyoxane-2-carboxylic acid
meta_1048	1048	679.435	TRUE	0.667764	11819.4	-0.00103133	C38H65O8P	-H(-)	95	HMDB0114823	PA(15:0/20:5(5Z,8Z,11Z,14Z,17Z))	Lipids and lipid-like molecules	Glycerophospholipids	Glycerophosphates	Aliphatic acyclic compounds	1,2-diacylglycerol-3-phosphates	NA	PA(15:0/20:5(5Z,8Z,11Z,14Z,17Z))
meta_1049	1049	679.53	TRUE	0.410015	13725.4	0.00113065	C44H72O5	-H(-)	81	HMDB0056289	DG(18:2n6/0:0/22:5n6)	Lipids and lipid-like molecules	Glycerolipids	Diradylglycerols	Aliphatic acyclic compounds	1,3-diacylglycerols	NA	DG(18:2n6/0:0/22:5n6)
meta_1050	1050	679.589	TRUE	-0.0313089	21707.4	-0.000812204	C42H80O6	-H(-)	100	HMDB0031110	Glycerol tritridecanoate	Lipids and lipid-like molecules	Glycerolipids	Triradylcglycerols	Aliphatic acyclic compounds	Triacylglycerols	NA	Glycerol tritridecanoate
meta_1051	1051	681.169	TRUE	0.693133	9973.62	-0.00144713	C30H34O18	-H(-)	49	HMDB0041232	8-Hydroxyhesperetin 7-[6-acetylglucosyl-(1->2)-glucoside]	Phenylpropanoids and polyketides	Flavonoids	Flavonoid glycosides	Aromatic heteropolycyclic compounds	Flavonoid-7-O-glycosides	NA	8-Hydroxyhesperetin 7-[6-acetylglucosyl-(1->2)-glucoside]
meta_1052	1052	683.27	TRUE	0.731379	10001	0.00103432	C36H44O13	-H(-)	95	HMDB0129788	6-{4-[3-(3,7-dimethylocta-2,6-dien-1-yl)-5,7-dihydroxy-6-(4-hydroxy-3-methylbut-2-en-1-yl)-4-oxo-3,4-dihydro-2H-1-benzopyran-2-yl]-3-hydroxyphenoxy}-3,4,5-trihydroxyoxane-2-carboxylic acid	Phenylpropanoids and polyketides	Flavonoids	Flavonoid glycosides	Aromatic heteropolycyclic compounds	Flavonoid O-glucuronides	NA	6-{4-[3-(3,7-dimethylocta-2,6-dien-1-yl)-5,7-dihydroxy-6-(4-hydroxy-3-methylbut-2-en-1-yl)-4-oxo-3,4-dihydro-2H-1-benzopyran-2-yl]-3-hydroxyphenoxy}-3,4,5-trihydroxyoxane-2-carboxylic acid
meta_1053	1053	685.48	TRUE	0.661025	15983.4	0.000991636	C38H71O8P	-H(-)	100	HMDB0115508	PA(15:0/20:2(11Z,14Z))	Lipids and lipid-like molecules	Glycerophospholipids	Glycerophosphates	Aliphatic acyclic compounds	1,2-diacylglycerol-3-phosphates	NA	PA(15:0/20:2(11Z,14Z))
meta_1054	1054	688.491	TRUE	0.762723	13693.9	0.00102002	C37H72NO8P	-H(-)	97	HMDB0007901	PC(14:1(9Z)/15:0)	Lipids and lipid-like molecules	Glycerophospholipids	Glycerophosphocholines	Aliphatic acyclic compounds	Phosphatidylcholines	NA	PC(14:1(9Z)/15:0)
meta_1055	1055	689.516	TRUE	0.805402	20191.9	-0.00107927	C45H70O5	-H(-)	88	HMDB0007469	DG(20:3(5Z,8Z,11Z)/22:6(4Z,7Z,10Z,13Z,16Z,19Z)/0:0)	Lipids and lipid-like molecules	Glycerolipids	Diradylglycerols	Aliphatic acyclic compounds	1,2-diacylglycerols	NA	DG(20:3(5Z,8Z,11Z)/22:6(4Z,7Z,10Z,13Z,16Z,19Z)/0:0)
meta_1056	1056	693.133	TRUE	0.830729	14861.8	0.000761887	C27H34O19S	-H(-)	100	HMDB0128237	[4-(3-oxo-3-{2,3,4-trihydroxy-5-[hydroxy(3,4,5-trihydroxyoxan-2-yl)methyl]-6-oxo-3-[3,4,5-trihydroxy-6-(hydroxymethyl)oxan-2-yl]cyclohexa-1,4-dien-1-yl}propyl)phenyl]oxidanesulfonic acid	Organic oxygen compounds	Organooxygen compounds	Carbohydrates and carbohydrate conjugates	Aromatic heteromonocyclic compounds	C-glycosyl compounds	NA	[4-(3-oxo-3-{2,3,4-trihydroxy-5-[hydroxy(3,4,5-trihydroxyoxan-2-yl)methyl]-6-oxo-3-[3,4,5-trihydroxy-6-(hydroxymethyl)oxan-2-yl]cyclohexa-1,4-dien-1-yl}propyl)phenyl]oxidanesulfonic acid
meta_1057	1057	693.45	TRUE	0.757121	14946.1	0.000231558	C39H67O8P	-H(-)	100	HMDB0114791	PA(14:0/22:5(4Z,7Z,10Z,13Z,16Z))	Lipids and lipid-like molecules	Glycerophospholipids	Glycerophosphates	Aliphatic acyclic compounds	1,2-diacylglycerol-3-phosphates	NA	PA(14:0/22:5(4Z,7Z,10Z,13Z,16Z))
meta_1058	1058	697.301	TRUE	0.779871	11416.9	0.000601952	C33H50N2O12S	-H(-)	100	HMDB0127549	3,4,5-trihydroxy-6-{[3-(2-methyl-1,3-thiazol-4-yl)-2-[(16R)-5,7,11-trihydroxy-8,8,10,12,16-pentamethyl-9-oxo-17-oxa-4-azabicyclo[14.1.0]heptadec-4-en-3-yl]prop-2-en-1-yl]oxy}oxane-2-carboxylic acid	Lipids and lipid-like molecules	Fatty Acyls	Fatty acyl glycosides	Aromatic heteropolycyclic compounds	Fatty acyl glycosides of mono- and disaccharides	NA	3,4,5-trihydroxy-6-{[3-(2-methyl-1,3-thiazol-4-yl)-2-[(16R)-5,7,11-trihydroxy-8,8,10,12,16-pentamethyl-9-oxo-17-oxa-4-azabicyclo[14.1.0]heptadec-4-en-3-yl]prop-2-en-1-yl]oxy}oxane-2-carboxylic acid
meta_1059	1059	697.415	TRUE	0.703371	12248.5	0.00136284	C37H62O12	-H(-)	56	HMDB0035944	Cyclopassifloside I	Lipids and lipid-like molecules	Prenol lipids	Terpene glycosides	Aliphatic heteropolycyclic compounds	Triterpene saponins	NA	Cyclopassifloside I
meta_1060	1060	699.496	TRUE	0.402748	63040.4	0.00141659	C39H73O8P	-H(-)	51	HMDB0007861	PA(18:0/18:2(9Z,12Z))	Lipids and lipid-like molecules	Glycerophospholipids	Glycerophosphates	Aliphatic acyclic compounds	1,2-diacylglycerol-3-phosphates	NA	PA(18:0/18:2(9Z,12Z))
meta_1061	1061	704.524	TRUE	-0.00145402	21150.4	-0.000762836	C38H76NO8P	-H(-)	100	HMDB0007869	PC(14:0/16:0)	Lipids and lipid-like molecules	Glycerophospholipids	Glycerophosphocholines	Aliphatic acyclic compounds	Phosphatidylcholines	yes	PC(14:0/16:0)
meta_1062	1062	705.181	TRUE	0.37377	12715.9	0.00178786	C36H34O15	-H(-)	28	HMDB0135132	6-({8-[3,7-dihydroxy-2-(3-hydroxyphenyl)-3,4-dihydro-2H-1-benzopyran-4-yl]-3,5-dihydroxy-2-(3-hydroxyphenyl)-3,4-dihydro-2H-1-benzopyran-7-yl}oxy)-3,4,5-trihydroxyoxane-2-carboxylic acid	Phenylpropanoids and polyketides	Flavonoids	Biflavonoids and polyflavonoids	Aromatic heteropolycyclic compounds	Biflavonoids and polyflavonoids	NA	6-({8-[3,7-dihydroxy-2-(3-hydroxyphenyl)-3,4-dihydro-2H-1-benzopyran-4-yl]-3,5-dihydroxy-2-(3-hydroxyphenyl)-3,4-dihydro-2H-1-benzopyran-7-yl}oxy)-3,4,5-trihydroxyoxane-2-carboxylic acid
meta_1063	1063	709.067	TRUE	0.886609	129315	0.000862934	C32H22O19	-H(-)	100	HMDB0134686	2,3,4,7,8,9,15,22,23,28-decahydroxy-14-(hydroxymethyl)-13,25,32,35-tetraoxaoctacyclo[14.13.3.3鹿番虏懂0惮鲁爱0冬鹿鹿.0鹿脯虏懂0鹿宫虏串0虏宫鲁鲁]pentatriaconta-1,3,5(30),6,8,10,19(24),20,22,28-decaene-12,27,31,34-tetrone	Phenylpropanoids and polyketides	Tannins	Hydrolyzable tannins	Aromatic heteropolycyclic compounds	Hydrolyzable tannins	NA	2,3,4,7,8,9,15,22,23,28-decahydroxy-14-(hydroxymethyl)-13,25,32,35-tetraoxaoctacyclo[14.13.3.3鹿番虏懂0惮鲁爱0冬鹿鹿.0鹿脯虏懂0鹿宫虏串0虏宫鲁鲁]pentatriaconta-1,3,5(30),6,8,10,19(24),20,22,28-decaene-12,27,31,34-tetrone
meta_1064	1064	712.495	TRUE	0.785108	28790.7	-0.00242021	C39H72NO8P	-H(-)	10	HMDB0008836	PE(14:0/20:3(5Z,8Z,11Z))	Lipids and lipid-like molecules	Glycerophospholipids	Glycerophosphoethanolamines	Aliphatic acyclic compounds	Phosphatidylethanolamines	NA	PE(14:0/20:3(5Z,8Z,11Z))
meta_1065	1065	713.412	TRUE	0.57869	16192.9	-0.000728035	C37H62O13	-H(-)	100	HMDB0036300	Cyclopassifloside VII	Lipids and lipid-like molecules	Prenol lipids	Terpene glycosides	Aliphatic heteropolycyclic compounds	Triterpene saponins	NA	Cyclopassifloside VII
meta_1066	1066	714.569	TRUE	0.60438	46910.9	-0.000807688	C40H80N2O6P	-H(-)	100	HMDB0029216	SM C16:1	Organic nitrogen compounds	Organonitrogen compounds	Quaternary ammonium salts	Aliphatic acyclic compounds	Phosphocholines	NA	SM C16:1
meta_1067	1067	715.292	TRUE	0.560385	25198.2	-0.000992328	C44H44O9	-H(-)	67	HMDB0035940	Mulberrofuran T	Phenylpropanoids and polyketides	2-arylbenzofuran flavonoids	Not classified	Aromatic heteropolycyclic compounds	2-arylbenzofuran flavonoids	NA	Mulberrofuran T
meta_1068	1068	720.497	TRUE	0.133001	59523.3	0.0006098	C41H72NO7P	-H(-)	100	HMDB0009215	PE(18:4(6Z,9Z,12Z,15Z)/P-18:1(11Z))	Lipids and lipid-like molecules	Glycerophospholipids	Glycerophosphoethanolamines	Aliphatic acyclic compounds	Glycerophosphoethanolamines	NA	PE(18:4(6Z,9Z,12Z,15Z)/P-18:1(11Z))
meta_1069	1069	721.436	TRUE	-0.0617016	27384	0.000491698	C40H68O7P2	-H(-)	100	HMDB0001094	Octaprenyl diphosphate	Lipids and lipid-like molecules	Prenol lipids	Tetraterpenoids	Aliphatic acyclic compounds	Tetraterpenoids	NA	Octaprenyl diphosphate
meta_1070	1070	721.481	TRUE	0.475851	70770.7	0.000841926	C41H71O8P	-H(-)	100	HMDB0114847	PA(16:0/22:5(4Z,7Z,10Z,13Z,16Z))	Lipids and lipid-like molecules	Glycerophospholipids	Glycerophosphates	Aliphatic acyclic compounds	1,2-diacylglycerol-3-phosphates	NA	PA(16:0/22:5(4Z,7Z,10Z,13Z,16Z))
meta_1071	1071	723.427	TRUE	0.430111	16868.7	-0.000787758	C46H60O7	-H(-)	100	HMDB0039970	Bis(4-methoxybenzoyl)-3a,29-dihydroxy-8-multifloren-7-one	Benzenoids	Benzene and substituted derivatives	Benzoic acids and derivatives	Aromatic homopolycyclic compounds	P-methoxybenzoic acids and derivatives	NA	Bis(4-methoxybenzoyl)-3a,29-dihydroxy-8-multifloren-7-one
meta_1072	1072	724.419	TRUE	0.792672	12633.3	0.000132469	C38H64NO10P	-H(-)	100	HMDB0112309	PS(14:1(9Z)/18:4(6Z,9Z,12Z,15Z))	Lipids and lipid-like molecules	Glycerophospholipids	Glycerophosphoserines	Aliphatic acyclic compounds	Phosphatidylserines	NA	PS(14:1(9Z)/18:4(6Z,9Z,12Z,15Z))
meta_1073	1073	728.524	TRUE	0.765829	38276.3	-0.00089454	C40H76NO8P	-H(-)	100	HMDB0007874	PC(14:0/18:2(9Z,12Z))	Lipids and lipid-like molecules	Glycerophospholipids	Glycerophosphocholines	Aliphatic acyclic compounds	Phosphatidylcholines	NA	PC(14:0/18:2(9Z,12Z))
meta_1074	1074	729.642	TRUE	-0.166512	20589.9	-0.00143385	C47H86O5	-H(-)	22	HMDB0007442	DG(20:2(11Z,14Z)/24:1(15Z)/0:0)	Lipids and lipid-like molecules	Glycerolipids	Diradylglycerols	Aliphatic acyclic compounds	1,2-diacylglycerols	NA	DG(20:2(11Z,14Z)/24:1(15Z)/0:0)
meta_1075	1075	730.54	TRUE	0.558765	45519.3	-0.000710284	C40H78NO8P	-H(-)	100	HMDB0007872	PC(14:0/18:1(11Z))	Lipids and lipid-like molecules	Glycerophospholipids	Glycerophosphocholines	Aliphatic acyclic compounds	Phosphatidylcholines	NA	PC(14:0/18:1(11Z))
meta_1076	1076	731.607	TRUE	-0.321097	58153.4	0.00030178	C41H85N2O6P	-H(-)	100	HMDB0012087	SM(d18:0/18:0)	Lipids and lipid-like molecules	Sphingolipids	Phosphosphingolipids	Aliphatic acyclic compounds	Phosphosphingolipids	yes	SM(d18:0/18:0)
meta_1077	1077	734.477	TRUE	0.484457	15360.8	-0.000761301	C41H70NO8P	-H(-)	100	HMDB0008847	PE(14:0/22:6(4Z,7Z,10Z,13Z,16Z,19Z))	Lipids and lipid-like molecules	Glycerophospholipids	Glycerophosphoethanolamines	Aliphatic acyclic compounds	Phosphatidylethanolamines	NA	PE(14:0/22:6(4Z,7Z,10Z,13Z,16Z,19Z))
meta_1078	1078	736.527	TRUE	0.347768	128385	0.0021333	C42H76NO7P	-H(-)	16	HMDB0008258	PC(18:4(6Z,9Z,12Z,15Z)/P-16:0)	Lipids and lipid-like molecules	Glycerophospholipids	Glycerophosphocholines	Aliphatic acyclic compounds	1-acyl,2-(1Z-alkenyl)-glycerophosphocholines	NA	PC(18:4(6Z,9Z,12Z,15Z)/P-16:0)
meta_1079	1079	738.507	TRUE	0.611631	111531	0.000986588	C41H74NO8P	-H(-)	100	HMDB0007943	PC(15:0/18:4(6Z,9Z,12Z,15Z))	Lipids and lipid-like molecules	Glycerophospholipids	Glycerophosphocholines	Aliphatic acyclic compounds	Phosphatidylcholines	NA	PC(15:0/18:4(6Z,9Z,12Z,15Z))
meta_1080	1080	741.241	TRUE	0.782361	15939.8	0.000538309	C38H38N4O12	-H(-)	100	HMDB0000743	Hexacarboxylporphyrin I	Organoheterocyclic compounds	Tetrapyrroles and derivatives	Porphyrins	Aromatic heteropolycyclic compounds	Porphyrins	NA	Hexacarboxylporphyrin I
meta_1081	1081	741.451	TRUE	0.687975	15142.8	-0.000792483	C43H67O8P	-H(-)	100	HMDB0114997	PA(18:3(6Z,9Z,12Z)/22:6(4Z,7Z,10Z,13Z,16Z,19Z))	Lipids and lipid-like molecules	Glycerophospholipids	Glycerophosphates	Aliphatic acyclic compounds	1,2-diacylglycerol-3-phosphates	NA	PA(18:3(6Z,9Z,12Z)/22:6(4Z,7Z,10Z,13Z,16Z,19Z))
meta_1082	1082	742.195	TRUE	0.78794	12811.2	0.000868015	C32H39O20	-H(-)	100	HMDB0037980	Cyanidin 3-sambubioside 5-glucoside	Phenylpropanoids and polyketides	Flavonoids	Flavonoid glycosides	Aromatic heteropolycyclic compounds	Anthocyanidin-5-O-glycosides	NA	Cyanidin 3-sambubioside 5-glucoside
meta_1083	1083	742.538	TRUE	0.786063	1.80224e+06	0.000911437	C41H78NO8P	-H(-)	100	HMDB0007940	PC(15:0/18:2(9Z,12Z))	Not classified	Not classified	Not classified	Not classified	Not classified	NA	PC(15:0/18:2(9Z,12Z))
meta_1084	1084	745.635	TRUE	0.613477	31921.3	1.68e-05	C47H86O6	-H(-)	100	HMDB0042279	TG(14:0/14:1(9Z)/16:1(9Z))	Lipids and lipid-like molecules	Glycerolipids	Triradylcglycerols	Aliphatic acyclic compounds	Triacylglycerols	NA	TG(14:0/14:1(9Z)/16:1(9Z))
meta_1085	1085	747.431	TRUE	0.751691	12861.7	0.00165125	C41H64O12	-H(-)	35	HMDB0038019	28-Glucosyl-19(29)-dehydroursolic acid 3-arabinoside	Lipids and lipid-like molecules	Prenol lipids	Terpene glycosides	Aliphatic heteropolycyclic compounds	Triterpene saponins	NA	28-Glucosyl-19(29)-dehydroursolic acid 3-arabinoside
meta_1086	1086	751.174	TRUE	0.721098	11207.3	-0.00109818	C33H36O20	-H(-)	85	HMDB0127310	6-[4-(5,7-dihydroxy-6-{4-hydroxy-6-methyl-5-oxo-3-[(3,4,5-trihydroxy-6-methyloxan-2-yl)oxy]oxan-2-yl}-4-oxo-4H-chromen-2-yl)-2-hydroxyphenoxy]-3,4,5-trihydroxyoxane-2-carboxylic acid	Phenylpropanoids and polyketides	Flavonoids	Flavonoid glycosides	Aromatic heteropolycyclic compounds	Flavonoid O-glucuronides	NA	6-[4-(5,7-dihydroxy-6-{4-hydroxy-6-methyl-5-oxo-3-[(3,4,5-trihydroxy-6-methyloxan-2-yl)oxy]oxan-2-yl}-4-oxo-4H-chromen-2-yl)-2-hydroxyphenoxy]-3,4,5-trihydroxyoxane-2-carboxylic acid
meta_1087	1087	752.526	TRUE	0.683533	31488	-0.0024245	C42H76NO8P	-H(-)	10	HMDB0007883	PC(14:0/20:4(5Z,8Z,11Z,14Z))	Not classified	Not classified	Not classified	Not classified	Not classified	yes	PC(14:0/20:4(5Z,8Z,11Z,14Z))
meta_1088	1088	753.06	TRUE	0.80488	14883	-0.0017698	C33H22O21	-H(-)	29	HMDB0134684	2,3,4,7,8,9,15,22,23,28-decahydroxy-14-(hydroxymethyl)-12,27,31,34-tetraoxo-13,25,32,35-tetraoxaoctacyclo[14.13.3.3鹿番虏懂0惮鲁爱0冬鹿鹿.0鹿脯虏懂0鹿宫虏串0虏宫鲁鲁]pentatriaconta-1,3,5(30),6,8,10,19(24),20,22,28-decaene-20-carboxylic acid	Phenylpropanoids and polyketides	Tannins	Hydrolyzable tannins	Aromatic heteropolycyclic compounds	Hydrolyzable tannins	NA	2,3,4,7,8,9,15,22,23,28-decahydroxy-14-(hydroxymethyl)-12,27,31,34-tetraoxo-13,25,32,35-tetraoxaoctacyclo[14.13.3.3鹿番虏懂0惮鲁爱0冬鹿鹿.0鹿脯虏懂0鹿宫虏串0虏宫鲁鲁]pentatriaconta-1,3,5(30),6,8,10,19(24),20,22,28-decaene-20-carboxylic acid
meta_1089	1089	754.191	TRUE	0.638212	9043.29	-0.000338238	C40H35O15	-H(-)	100	HMDB0031974	Malvidin 6-(6-p-coumaroylglucoside)-4-vinylphenol	Phenylpropanoids and polyketides	Flavonoids	Flavonoid glycosides	Aromatic heteropolycyclic compounds	Anthocyanidin 3-O-6-p-coumaroyl glycosides	NA	Malvidin 6-(6-p-coumaroylglucoside)-4-vinylphenol
meta_1090	1090	754.538	TRUE	0.681533	26883.1	0.00147213	C42H78NO8P	-H(-)	47	HMDB0007881	PC(14:0/20:3(5Z,8Z,11Z))	Lipids and lipid-like molecules	Glycerophospholipids	Glycerophosphocholines	Aliphatic acyclic compounds	Phosphatidylcholines	NA	PC(14:0/20:3(5Z,8Z,11Z))
meta_1091	1091	754.618	TRUE	0.165729	16180.3	0.00187147	C44H85NO8	-H(-)	25	HMDB0004973	Glucosylceramide (d18:1/20:0)	Lipids and lipid-like molecules	Sphingolipids	Glycosphingolipids	Aliphatic heteromonocyclic compounds	Glycosyl-N-acylsphingosines	NA	Glucosylceramide (d18:1/20:0)
meta_1092	1092	755.205	TRUE	0.60051	8608.66	-0.000921247	C33H40O20	-H(-)	100	HMDB0034396	Kaempferol 3-gentiobioside 7-rhamnoside	Phenylpropanoids and polyketides	Flavonoids	Flavonoid glycosides	Aromatic heteropolycyclic compounds	Flavonoid-7-O-glycosides	NA	Kaempferol 3-gentiobioside 7-rhamnoside
meta_1093	1093	756.212	TRUE	0.690089	13421.8	-0.000532782	C33H41O20	-H(-)	100	HMDB0033687	Pelargonidin 3-sophoroside 5-glucoside	Phenylpropanoids and polyketides	Flavonoids	Flavonoid glycosides	Aromatic heteropolycyclic compounds	Anthocyanidin-5-O-glycosides	NA	Pelargonidin 3-sophoroside 5-glucoside
meta_1094	1094	757.139	TRUE	0.739223	6599.08	-0.00032614	C42H30O12S	-H(-)	100	HMDB0129138	{4-[7,15,23-trihydroxy-11,19-bis(4-hydroxyphenyl)-4,12,20-trioxaheptacyclo[16.6.1.1虏,诞1鹿艾鹿鲁.0虏鹿,虏诞0宫虏樊0鹿番虏遁heptacosa-1(25),5,7,9(27),13,15,17(26),21,23-nonaen-3-yl]phenyl}oxidanesulfonic acid	Phenylpropanoids and polyketides	2-arylbenzofuran flavonoids	Not classified	Aromatic heteropolycyclic compounds	2-arylbenzofuran flavonoids	NA	{4-[7,15,23-trihydroxy-11,19-bis(4-hydroxyphenyl)-4,12,20-trioxaheptacyclo[16.6.1.1虏,诞1鹿艾鹿鲁.0虏鹿,虏诞0宫虏樊0鹿番虏遁heptacosa-1(25),5,7,9(27),13,15,17(26),21,23-nonaen-3-yl]phenyl}oxidanesulfonic acid
meta_1095	1095	759.64	TRUE	0.224441	13928.9	-0.00118725	C43H89N2O6P	-H(-)	74	HMDB0012090	SM(d18:0/20:0)	Lipids and lipid-like molecules	Sphingolipids	Phosphosphingolipids	Aliphatic acyclic compounds	Phosphosphingolipids	NA	SM(d18:0/20:0)
meta_1096	1096	762.391	TRUE	0.640302	8781.85	0.000488221	C36H61NO16	-H(-)	100	HMDB0034713	Fumonisin A1	Organic acids and derivatives	Carboxylic acids and derivatives	Fumonisins	Aliphatic acyclic compounds	Fumonisins	NA	Fumonisin A1
meta_1097	1097	763.549	TRUE	0.726258	40204.6	-2.49e-05	C41H81O10P	-H(-)	100	HMDB0116652	PG(a-13:0/i-22:0)	Lipids and lipid-like molecules	Glycerophospholipids	Glycerophosphoglycerols	Aliphatic acyclic compounds	Phosphatidylglycerols	NA	PG(a-13:0/i-22:0)
meta_1098	1098	765.409	TRUE	0.550001	10253	-0.00228134	C40H62O14	-H(-)	13	HMDB0041185	(3b,5a,25R)-3-Hydroxyspirostan-6-one 3-[2-acetylarabinosyl-(1->6)-glucoside]	Lipids and lipid-like molecules	Steroids and steroid derivatives	Steroidal glycosides	Aliphatic heteropolycyclic compounds	Steroidal saponins	NA	(3b,5a,25R)-3-Hydroxyspirostan-6-one 3-[2-acetylarabinosyl-(1->6)-glucoside]
meta_1099	1099	765.442	TRUE	0.776625	11102.4	0.00107453	C41H66O13	-H(-)	89	HMDB0031357	Pitheduloside A	Lipids and lipid-like molecules	Prenol lipids	Terpene glycosides	Aliphatic heteropolycyclic compounds	Triterpene saponins	NA	Pitheduloside A
meta_1100	1100	770.207	TRUE	0.697472	9387.74	-0.000436094	C37H39O18	-H(-)	100	HMDB0125098	[(6-{[5,7-dihydroxy-2-(4-oxocyclohexa-2,5-dien-1-ylidene)-2H-chromen-3-yl]oxy}-3,4-dihydroxy-5-{[3,4,5-trihydroxy-6-(hydroxymethyl)oxan-2-yl]oxy}oxan-2-yl)methyl][1-hydroxy-3-(4-hydroxy-3-methoxyphenyl)prop-2-en-1-ylidene]oxidanium	Phenylpropanoids and polyketides	Cinnamic acids and derivatives	Hydroxycinnamic acids and derivatives	Aromatic heteropolycyclic compounds	Hydroxycinnamic acids	NA	[(6-{[5,7-dihydroxy-2-(4-oxocyclohexa-2,5-dien-1-ylidene)-2H-chromen-3-yl]oxy}-3,4-dihydroxy-5-{[3,4,5-trihydroxy-6-(hydroxymethyl)oxan-2-yl]oxy}oxan-2-yl)methyl][1-hydroxy-3-(4-hydroxy-3-methoxyphenyl)prop-2-en-1-ylidene]oxidanium
meta_1101	1101	770.499	TRUE	0.68399	22633.6	-0.00106514	C41H74NO10P	-H(-)	67	HMDB0112329	PS(15:0/20:3(5Z,8Z,11Z))	Lipids and lipid-like molecules	Glycerophospholipids	Glycerophosphoserines	Aliphatic acyclic compounds	Phosphatidylserines	NA	PS(15:0/20:3(5Z,8Z,11Z))
meta_1102	1102	772.183	TRUE	0.690976	13929.7	0.00213212	C36H37O19	-H(-)	16	HMDB0037983	Cyanidin 3-(6-caffeoylglucoside) 5-glucoside	Phenylpropanoids and polyketides	Flavonoids	Flavonoid glycosides	Aromatic heteropolycyclic compounds	Flavonoid 3-O-p-coumaroyl glycosides	NA	Cyanidin 3-(6-caffeoylglucoside) 5-glucoside
meta_1103	1103	775.68	TRUE	0.699276	15083.9	0.00168159	C49H92O6	-H(-)	33	HMDB0010412	TG(16:0/14:0/16:1(9Z))	Lipids and lipid-like molecules	Glycerolipids	Triradylcglycerols	Aliphatic acyclic compounds	Triacylglycerols	NA	TG(16:0/14:0/16:1(9Z))
meta_1104	1104	778.465	TRUE	0.551922	20168.5	0.00134367	C42H70NO10P	-H(-)	58	HMDB0012340	PS(14:0/22:6(4Z,7Z,10Z,13Z,16Z,19Z))	Lipids and lipid-like molecules	Glycerophospholipids	Glycerophosphoserines	Aliphatic acyclic compounds	Phosphatidylserines	NA	PS(14:0/22:6(4Z,7Z,10Z,13Z,16Z,19Z))
meta_1105	1105	782.643	TRUE	0.365574	12793.2	0.000348997	C46H90NO6P	-H(-)	100	HMDB0010707	CerP(d18:1/26:1(17Z))	Lipids and lipid-like molecules	Sphingolipids	Phosphosphingolipids	Aliphatic acyclic compounds	Phosphosphingolipids	NA	CerP(d18:1/26:1(17Z))
meta_1106	1106	783.452	TRUE	0.735043	9929.91	0.00154733	C41H68O14	-H(-)	41	HMDB0040658	Hoduloside VI	Lipids and lipid-like molecules	Prenol lipids	Triterpenoids	Aliphatic heteropolycyclic compounds	Triterpenoids	NA	Hoduloside VI
meta_1107	1107	785.223	TRUE	0.57346	9273.45	0.000743608	C45H38O13	-H(-)	100	HMDB0134989	6,8-bis[3,7-dihydroxy-2-(3-hydroxyphenyl)-3,4-dihydro-2H-1-benzopyran-4-yl]-2-(3-hydroxyphenyl)-3,4-dihydro-2H-1-benzopyran-3,5,7-triol	Phenylpropanoids and polyketides	Flavonoids	Biflavonoids and polyflavonoids	Aromatic heteropolycyclic compounds	Biflavonoids and polyflavonoids	NA	6,8-bis[3,7-dihydroxy-2-(3-hydroxyphenyl)-3,4-dihydro-2H-1-benzopyran-4-yl]-2-(3-hydroxyphenyl)-3,4-dihydro-2H-1-benzopyran-3,5,7-triol
meta_1108	1108	795.163	TRUE	0.866232	92564.5	-0.00046136	C34H36O22	-H(-)	100	HMDB0041730	(-)-Epigallocatechin 3-gallate 7-glucoside 4"-glucuronide	Phenylpropanoids and polyketides	Flavonoids	Flavans	Aromatic heteropolycyclic compounds	Catechin gallates	NA	(-)-Epigallocatechin 3-gallate 7-glucoside 4"-glucuronide
meta_1109	1109	795.497	TRUE	0.703185	34461.8	0.000387038	C47H73O8P	-H(-)	61	HMDB0115346	PA(22:4(7Z,10Z,13Z,16Z)/22:6(4Z,7Z,10Z,13Z,16Z,19Z))	Lipids and lipid-like molecules	Glycerophospholipids	Glycerophosphates	Aliphatic acyclic compounds	1,2-diacylglycerol-3-phosphates	NA	PA(22:4(7Z,10Z,13Z,16Z)/22:6(4Z,7Z,10Z,13Z,16Z,19Z))
meta_1110	1110	796.588	TRUE	-0.0441878	369063	-0.00155453	C45H84NO8P	-H(-)	41	HMDB0009041	PE(18:1(11Z)/22:2(13Z,16Z))	Lipids and lipid-like molecules	Glycerophospholipids	Glycerophosphoethanolamines	Aliphatic acyclic compounds	Phosphatidylethanolamines	NA	PE(18:1(11Z)/22:2(13Z,16Z))
meta_1111	1111	797.513	TRUE	0.638139	39500.8	-0.000580255	C47H75O8P	-H(-)	100	HMDB0115344	PA(22:4(7Z,10Z,13Z,16Z)/22:5(4Z,7Z,10Z,13Z,16Z))	Lipids and lipid-like molecules	Glycerophospholipids	Glycerophosphates	Aliphatic acyclic compounds	1,2-diacylglycerol-3-phosphates	NA	PA(22:4(7Z,10Z,13Z,16Z)/22:5(4Z,7Z,10Z,13Z,16Z))
meta_1112	1112	800.203	TRUE	0.556704	18830.3	-0.000912771	C34H41O22	-H(-)	100	HMDB0037091	Delphinidin 3-lathyroside 5-(6-acetylglucoside)	Phenylpropanoids and polyketides	Flavonoids	Flavonoid glycosides	Aromatic heteropolycyclic compounds	Anthocyanidin-5-O-glycosides	NA	Delphinidin 3-lathyroside 5-(6-acetylglucoside)
meta_1113	1113	806.546	TRUE	0.924915	96084.7	0.000199552	C42H81NO11S	-H(-)	54	HMDB0012314	3-O-Sulfogalactosylceramide (d18:1/18:0)	Lipids and lipid-like molecules	Sphingolipids	Glycosphingolipids	Aliphatic heteromonocyclic compounds	Sulfatides	NA	3-O-Sulfogalactosylceramide (d18:1/18:0)
meta_1114	1114	809.396	TRUE	0.693054	26292.3	0.000236089	C41H62O16	-H(-)	100	HMDB0033427	Betavulgaroside VII	Lipids and lipid-like molecules	Prenol lipids	Terpene glycosides	Aliphatic heteropolycyclic compounds	Triterpene saponins	NA	Betavulgaroside VII
meta_1115	1115	809.666	TRUE	0.700488	16821.4	0.000699018	C52H90O6	-H(-)	100	HMDB0042117	TG(14:0/15:0/20:5(5Z,8Z,11Z,14Z,17Z))	Lipids and lipid-like molecules	Glycerolipids	Triradylcglycerols	Aliphatic acyclic compounds	Triacylglycerols	NA	TG(14:0/15:0/20:5(5Z,8Z,11Z,14Z,17Z))
meta_1116	1116	810.684	TRUE	0.614427	14791	-0.00134728	C48H93NO8	-H(-)	57	HMDB0000140	Glucosylceramide	Lipids and lipid-like molecules	Sphingolipids	Glycosphingolipids	Aliphatic heteromonocyclic compounds	Glycosyl-N-acylsphingosines	NA	Glucosylceramide
meta_1117	1117	811.12	TRUE	0.726164	12774.4	0.00109093	C33H32O24	-H(-)	86	HMDB0133118	6-[2,3-dihydroxy-5-({[5-hydroxy-2-(hydroxymethyl)-4,6-bis(3,4,5-trihydroxybenzoyloxy)oxan-3-yl]oxy}carbonyl)phenoxy]-3,4,5-trihydroxyoxane-2-carboxylic acid	Phenylpropanoids and polyketides	Tannins	Hydrolyzable tannins	Aromatic heteromonocyclic compounds	Hydrolyzable tannins	NA	6-[2,3-dihydroxy-5-({[5-hydroxy-2-(hydroxymethyl)-4,6-bis(3,4,5-trihydroxybenzoyloxy)oxan-3-yl]oxy}carbonyl)phenoxy]-3,4,5-trihydroxyoxane-2-carboxylic acid
meta_1118	1118	811.67	TRUE	0.508886	15234.9	-0.000155709	C47H93N2O6P	-H(-)	100	HMDB0012107	SM(d18:1/24:1(15Z))	Lipids and lipid-like molecules	Sphingolipids	Phosphosphingolipids	Aliphatic acyclic compounds	Phosphosphingolipids	yes	SM(d18:1/24:1(15Z))
meta_1119	1119	811.682	TRUE	0.499658	14343	-9.15e-05	C52H92O6	-H(-)	100	HMDB0042110	TG(14:0/15:0/20:4(5Z,8Z,11Z,14Z))	Lipids and lipid-like molecules	Glycerolipids	Triradylcglycerols	Aliphatic acyclic compounds	Triacylglycerols	NA	TG(14:0/15:0/20:4(5Z,8Z,11Z,14Z))
meta_1120	1120	812.655	TRUE	0.515675	24726.7	-0.00080638	C47H92NO7P	-H(-)	66	HMDB0009743	PE(24:0/P-18:1(11Z))	Lipids and lipid-like molecules	Glycerophospholipids	Glycerophosphoethanolamines	Aliphatic acyclic compounds	Glycerophosphoethanolamines	NA	PE(24:0/P-18:1(11Z))
meta_1121	1121	817.213	TRUE	0.785886	16207.7	0.000565981	C45H38O15	-H(-)	100	HMDB0134983	6,8-bis[2-(3,4-dihydroxyphenyl)-3,7-dihydroxy-3,4-dihydro-2H-1-benzopyran-4-yl]-2-(3-hydroxyphenyl)-3,4-dihydro-2H-1-benzopyran-3,5,7-triol	Phenylpropanoids and polyketides	Flavonoids	Biflavonoids and polyflavonoids	Aromatic heteropolycyclic compounds	Biflavonoids and polyflavonoids	NA	6,8-bis[2-(3,4-dihydroxyphenyl)-3,7-dihydroxy-3,4-dihydro-2H-1-benzopyran-4-yl]-2-(3-hydroxyphenyl)-3,4-dihydro-2H-1-benzopyran-3,5,7-triol
meta_1122	1122	817.474	TRUE	0.794671	21037.1	-8.17e-05	C45H70O13	-H(-)	100	HMDB0030442	Dinophysistoxin 1	Organic acids and derivatives	Hydroxy acids and derivatives	Alpha hydroxy acids and derivatives	Aliphatic heteropolycyclic compounds	Alpha hydroxy acids and derivatives	NA	Dinophysistoxin 1
meta_1123	1123	824.618	TRUE	-0.0665469	167985	-0.000130033	C47H88NO8P	-H(-)	100	HMDB0009113	PE(18:2(9Z,12Z)/24:1(15Z))	Lipids and lipid-like molecules	Glycerophospholipids	Glycerophosphoethanolamines	Aliphatic acyclic compounds	Phosphatidylethanolamines	NA	PE(18:2(9Z,12Z)/24:1(15Z))
meta_1124	1124	825.564	TRUE	0.152073	107682	0.00158455	C46H83O10P	-H(-)	39	HMDB0010611	PG(18:0/22:4(7Z,10Z,13Z,16Z))	Lipids and lipid-like molecules	Glycerophospholipids	Glycerophosphoglycerols	Aliphatic acyclic compounds	Phosphatidylglycerols	NA	PG(18:0/22:4(7Z,10Z,13Z,16Z))
meta_1125	1125	825.696	TRUE	0.510887	18537.5	0.00205762	C53H94O6	-H(-)	18	HMDB0005435	TG(16:1(9Z)/16:1(9Z)/18:2(9Z,12Z))	Lipids and lipid-like molecules	Glycerolipids	Triradylcglycerols	Aliphatic acyclic compounds	Triacylglycerols	NA	TG(16:1(9Z)/16:1(9Z)/18:2(9Z,12Z))
meta_1126	1126	827.267	TRUE	0.649708	9498.18	0.000360784	C30H52O26	-H(-)	100	HMDB0003255	Amylopectin	Organic oxygen compounds	Organooxygen compounds	Carbohydrates and carbohydrate conjugates	Aliphatic heteromonocyclic compounds	Oligosaccharides	NA	Amylopectin
meta_1127	1127	829.221	TRUE	0.780492	10480.3	0.000379265	C40H38N4O16	-H(-)	100	HMDB0000890	Uroporphyrin IV	Organoheterocyclic compounds	Tetrapyrroles and derivatives	Porphyrins	Aromatic heteropolycyclic compounds	Porphyrins	NA	Uroporphyrin IV
meta_1128	1128	831.23	TRUE	0.702417	8712.18	-6.12e-05	C46H40O15	-H(-)	100	HMDB0135007	8-[3,7-dihydroxy-2-(4-hydroxy-3-methoxyphenyl)-3,4-dihydro-2H-1-benzopyran-4-yl]-6-[2-(3,4-dihydroxyphenyl)-3,7-dihydroxy-3,4-dihydro-2H-1-benzopyran-4-yl]-2-(3-hydroxyphenyl)-3,4-dihydro-2H-1-benzopyran-3,5,7-triol	Phenylpropanoids and polyketides	Flavonoids	Biflavonoids and polyflavonoids	Aromatic heteropolycyclic compounds	Biflavonoids and polyflavonoids	NA	8-[3,7-dihydroxy-2-(4-hydroxy-3-methoxyphenyl)-3,4-dihydro-2H-1-benzopyran-4-yl]-6-[2-(3,4-dihydroxyphenyl)-3,7-dihydroxy-3,4-dihydro-2H-1-benzopyran-4-yl]-2-(3-hydroxyphenyl)-3,4-dihydro-2H-1-benzopyran-3,5,7-triol
meta_1129	1129	831.419	TRUE	0.693336	8452.08	-0.00011664	C45H60N4O11	-H(-)	100	HMDB0061043	27-O-demethylrifabutin	Organoheterocyclic compounds	Naphthofurans	Not classified	Aromatic heteropolycyclic compounds	Naphthofurans	NA	27-O-demethylrifabutin
meta_1130	1130	833.681	TRUE	0.659648	11001.6	0.000675508	C58H90O3	-H(-)	100	HMDB0062428	6-methoxy-3-methyl-2-all-trans-decaprenyl-1,4-benzoquinol	Lipids and lipid-like molecules	Prenol lipids	Quinone and hydroquinone lipids	Aromatic homomonocyclic compounds	Polyprenyl quinols	NA	6-methoxy-3-methyl-2-all-trans-decaprenyl-1,4-benzoquinol
meta_1131	1131	833.755	TRUE	0.53257	9495.77	-0.000583393	C60H98O	-H(-)	100	HMDB0031940	Arachisprenol 12	Lipids and lipid-like molecules	Prenol lipids	Polyprenols	Aliphatic acyclic compounds	Polyprenols	NA	Arachisprenol 12
meta_1132	1132	835.484	TRUE	0.747682	12888.4	0.00116307	C45H72O14	-H(-)	77	HMDB0034597	Hebevinoside VII	Lipids and lipid-like molecules	Steroids and steroid derivatives	Steroidal glycosides	Aliphatic heteropolycyclic compounds	Cucurbitacin glycosides	NA	Hebevinoside VII
meta_1133	1133	837.427	TRUE	0.705626	10995.6	0.00040069	C43H66O16	-H(-)	100	HMDB0040957	Talinumoside I	Lipids and lipid-like molecules	Prenol lipids	Terpene glycosides	Aliphatic heteropolycyclic compounds	Triterpene saponins	NA	Talinumoside I
meta_1134	1134	837.659	TRUE	0.511524	13314.1	0.00244654	C53H90O7	-H(-)	10	HMDB0032813	Isofucosterol 3-O-[6-O-(9-Octadecenoyl)-b-D-glucopyranoside]	Lipids and lipid-like molecules	Steroids and steroid derivatives	Stigmastanes and derivatives	Aliphatic heteropolycyclic compounds	Stigmastanes and derivatives	NA	Isofucosterol 3-O-[6-O-(9-Octadecenoyl)-b-D-glucopyranoside]
meta_1135	1135	848.521	TRUE	0.56133	18933.8	0.00213738	C50H76NO8P	-H(-)	16	HMDB0113698	PE-NMe(22:6(4Z,7Z,10Z,13Z,16Z,19Z)/22:6(4Z,7Z,10Z,13Z,16Z,19Z))	Lipids and lipid-like molecules	Glycerophospholipids	Glycerophosphoethanolamines	Aliphatic acyclic compounds	Monomethylphosphatidylethanolamines	NA	PE-NMe(22:6(4Z,7Z,10Z,13Z,16Z,19Z)/22:6(4Z,7Z,10Z,13Z,16Z,19Z))
meta_1136	1136	848.655	TRUE	0.679725	30171.5	-0.00098793	C50H92NO7P	-H(-)	100	HMDB0013451	PC(o-22:1(13Z)/20:4(8Z,11Z,14Z,17Z))	Lipids and lipid-like molecules	Glycerophospholipids	Glycerophosphocholines	Aliphatic acyclic compounds	1-alkyl,2-acylglycero-3-phosphocholines	NA	PC(o-22:1(13Z)/20:4(8Z,11Z,14Z,17Z))
meta_1137	1137	851.569	TRUE	0.549841	20405	-0.000554026	C47H83NO10P	-H(-)	100	HMDB0061395	PC(DiMe(11,3)/MonoMe(11,3))	Lipids and lipid-like molecules	Glycerophospholipids	Glycerophosphocholines	Aromatic heteromonocyclic compounds	Phosphatidylcholines	NA	PC(DiMe(11,3)/MonoMe(11,3))
meta_1138	1138	854.395	TRUE	0.564269	10584.7	0.00242173	C37H67N3O15P2	-H(-)	10	HMDB0116068	CDP-DG(a-13:0/i-12:0)	Lipids and lipid-like molecules	Glycerophospholipids	CDP-glycerols	Aromatic heteromonocyclic compounds	CDP-diacylglycerols	NA	CDP-DG(a-13:0/i-12:0)
meta_1139	1139	857.561	TRUE	0.563083	19011.6	0.000690712	C50H84O7P2	-H(-)	75	HMDB0059616	all-trans-Decaprenyl diphosphate	Lipids and lipid-like molecules	Prenol lipids	Polyprenols	Aliphatic acyclic compounds	Bactoprenol diphosphates	NA	all-trans-Decaprenyl diphosphate
meta_1140	1140	863.024	TRUE	0.743142	12501.1	0.000994299	C34H24O25S	-H(-)	100	HMDB0129874	(10-{2,3,4,7,8,9,19-heptahydroxy-12,17-dioxo-13,16-dioxatetracyclo[13.3.1.0惮鹿府0冬鹿鹿]nonadeca-1,3,5(18),6,8,10-hexaen-14-yl}-3,4,5,16,17,18-hexahydroxy-8,14-dioxo-9,13-dioxatricyclo[13.3.1.0虏,份nonadeca-1(19),2,4,6,15,17-hexaen-11-yl)oxidanesulfonic acid	Phenylpropanoids and polyketides	Tannins	Hydrolyzable tannins	Aromatic heteropolycyclic compounds	Hydrolyzable tannins	NA	(10-{2,3,4,7,8,9,19-heptahydroxy-12,17-dioxo-13,16-dioxatetracyclo[13.3.1.0惮鹿府0冬鹿鹿]nonadeca-1,3,5(18),6,8,10-hexaen-14-yl}-3,4,5,16,17,18-hexahydroxy-8,14-dioxo-9,13-dioxatricyclo[13.3.1.0虏,份nonadeca-1(19),2,4,6,15,17-hexaen-11-yl)oxidanesulfonic acid
meta_1141	1141	864.504	TRUE	0.632963	13994.2	-0.0010484	C46H76NO12P	-H(-)	93	HMDB0061552	PS(DiMe(11,3)/DiMe(11,3))	Lipids and lipid-like molecules	Glycerophospholipids	Glycerophosphoserines	Aromatic heteromonocyclic compounds	Phosphatidylserines	NA	PS(DiMe(11,3)/DiMe(11,3))
meta_1142	1142	868.233	TRUE	0.202452	13507.4	-0.00200888	C41H43NO20	-H(-)	20	HMDB0134935	6-{[2-(4-{[3-({3,4-dihydroxy-4-[(1H-indole-3-carbonyloxy)methyl]oxolan-2-yl}oxy)-4,5-dihydroxy-6-(hydroxymethyl)oxan-2-yl]oxy}phenyl)-4-oxo-3,4-dihydro-2H-1-benzopyran-7-yl]oxy}-3,4,5-trihydroxyoxane-2-carboxylic acid	Phenylpropanoids and polyketides	Flavonoids	Flavonoid glycosides	Aromatic heteropolycyclic compounds	Flavonoid-7-O-glucuronides	NA	6-{[2-(4-{[3-({3,4-dihydroxy-4-[(1H-indole-3-carbonyloxy)methyl]oxolan-2-yl}oxy)-4,5-dihydroxy-6-(hydroxymethyl)oxan-2-yl]oxy}phenyl)-4-oxo-3,4-dihydro-2H-1-benzopyran-7-yl]oxy}-3,4,5-trihydroxyoxane-2-carboxylic acid
meta_1143	1143	868.999	TRUE	0.56738	12140.4	-0.000501267	C20H26N8O23P4	-H(-)	100	HMDB0003834	P1,P4-Bis(5'-xanthosyl) tetraphosphate	Nucleosides, nucleotides, and analogues	(5'->5')-dinucleotides	Not classified	Aromatic heteropolycyclic compounds	(5'->5')-dinucleotides	NA	P1,P4-Bis(5'-xanthosyl) tetraphosphate
meta_1144	1144	869.761	TRUE	0.409199	10922.8	-0.000862558	C56H102O6	-H(-)	100	HMDB0043058	TG(15:0/18:0/20:3(5Z,8Z,11Z))	Lipids and lipid-like molecules	Glycerolipids	Triradylcglycerols	Aliphatic acyclic compounds	Triacylglycerols	NA	TG(15:0/18:0/20:3(5Z,8Z,11Z))
meta_1145	1145	872.617	TRUE	0.282791	60907.9	0.000295776	C51H88NO8P	-H(-)	100	HMDB0009707	PE(22:6(4Z,7Z,10Z,13Z,16Z,19Z)/24:1(15Z))	Lipids and lipid-like molecules	Glycerophospholipids	Glycerophosphoethanolamines	Aliphatic acyclic compounds	Phosphatidylethanolamines	NA	PE(22:6(4Z,7Z,10Z,13Z,16Z,19Z)/24:1(15Z))
meta_1146	1146	872.709	TRUE	0.431929	15609.2	0.00217707	C50H100NO8P	-H(-)	15	HMDB0008058	PC(18:0/24:0)	Lipids and lipid-like molecules	Glycerophospholipids	Glycerophosphocholines	Aliphatic acyclic compounds	Phosphatidylcholines	NA	PC(18:0/24:0)
meta_1147	1147	875.446	TRUE	0.596092	9230.94	-0.000921419	C47H64N4O12	-H(-)	100	HMDB0015332	Rifapentine	Organoheterocyclic compounds	Naphthofurans	Not classified	Aromatic heteropolycyclic compounds	Naphthofurans	NA	Rifapentine
meta_1148	1148	878.199	TRUE	0.609929	10091.6	-0.00212309	C28H48N7O17P3S	-H(-)	16	HMDB0011660	2-Methylhexanoyl-CoA	Lipids and lipid-like molecules	Fatty Acyls	Fatty acyl thioesters	Aromatic heteropolycyclic compounds	2,3,4-saturated fatty acyl CoAs	NA	2-Methylhexanoyl-CoA
meta_1149	1149	882.43	TRUE	0.48143	13562.2	-0.00110119	C39H71N3O15P2	-H(-)	85	HMDB0116070	CDP-DG(a-13:0/i-14:0)	Lipids and lipid-like molecules	Glycerophospholipids	CDP-glycerols	Aromatic heteromonocyclic compounds	CDP-diacylglycerols	NA	CDP-DG(a-13:0/i-14:0)
meta_1150	1150	891.651	TRUE	0.22589	9766.44	-0.000580774	C59H88O6	-H(-)	100	HMDB0055503	TG(18:4(6Z,9Z,12Z,15Z)/18:4(6Z,9Z,12Z,15Z)/20:5(5Z,8Z,11Z,14Z,17Z))	Lipids and lipid-like molecules	Glycerolipids	Triradylcglycerols	Aliphatic acyclic compounds	Triacylglycerols	NA	TG(18:4(6Z,9Z,12Z,15Z)/18:4(6Z,9Z,12Z,15Z)/20:5(5Z,8Z,11Z,14Z,17Z))
meta_1151	1151	893.29	TRUE	0.560826	6913.69	-0.00244246	C45H50O19	-H(-)	10	HMDB0034055	Mangicrocin	Lipids and lipid-like molecules	Prenol lipids	Diterpenoids	Aromatic heteropolycyclic compounds	Diterpenoids	NA	Mangicrocin
meta_1152	1152	894.621	TRUE	0.549128	13999.8	0.00211688	C50H90NO10P	-H(-)	17	HMDB0112620	PS(20:3(5Z,8Z,11Z)/24:1(15Z))	Lipids and lipid-like molecules	Glycerophospholipids	Glycerophosphoserines	Aliphatic acyclic compounds	Phosphatidylserines	NA	PS(20:3(5Z,8Z,11Z)/24:1(15Z))
meta_1153	1153	898.532	TRUE	0.634262	13149.6	0.000223165	C50H77NO13	-H(-)	100	HMDB0061048	41-O-demethylrapamycin	Phenylpropanoids and polyketides	Macrolide lactams	Not classified	Aliphatic heteropolycyclic compounds	Macrolide lactams	NA	41-O-demethylrapamycin
meta_1154	1154	900.145	TRUE	0.609159	9785.56	-0.000648704	C29H42N7O18P3S	-H(-)	100	HMDB0003967	4-Hydroxyphenylacetyl-CoA	Lipids and lipid-like molecules	Fatty Acyls	Fatty acyl thioesters	Aromatic heteropolycyclic compounds	Acyl CoAs	NA	4-Hydroxyphenylacetyl-CoA
meta_1155	1155	900.498	TRUE	0.797954	27874.6	-0.00223396	C45H75NO17	-H(-)	14	HMDB0029343	beta1-Tomatidine	Lipids and lipid-like molecules	Steroids and steroid derivatives	Steroidal glycosides	Aliphatic heteropolycyclic compounds	Steroidal saponins	NA	beta1-Tomatidine
meta_1156	1156	904.681	TRUE	0.486048	11007	-0.000585849	C53H96NO8P	-H(-)	100	HMDB0114522	PE-NMe2(22:4(7Z,10Z,13Z,16Z)/24:1(15Z))	Lipids and lipid-like molecules	Glycerophospholipids	Glycerophosphoethanolamines	Aliphatic acyclic compounds	Dimethylphosphatidylethanolamines	NA	PE-NMe2(22:4(7Z,10Z,13Z,16Z)/24:1(15Z))
meta_1157	1157	905.475	TRUE	0.542091	7186.12	0.000264896	C44H74O19	-H(-)	100	HMDB0036485	Trigoneoside XIb	Lipids and lipid-like molecules	Steroids and steroid derivatives	Steroidal glycosides	Aliphatic heteropolycyclic compounds	Steroidal saponins	NA	Trigoneoside XIb
meta_1158	1158	909.448	TRUE	0.564372	10682.4	0.00125083	C46H70O18	-H(-)	67	HMDB0034817	Betavulgaroside X	Lipids and lipid-like molecules	Prenol lipids	Terpene glycosides	Aliphatic heteropolycyclic compounds	Diterpene glycosides	NA	Betavulgaroside X
meta_1159	1159	915.779	TRUE	0.404328	7563.24	0.00197875	C61H104O5	-H(-)	21	HMDB0051354	TG(20:3(5Z,8Z,11Z)/20:5(5Z,8Z,11Z,14Z,17Z)/o-18:0)	Lipids and lipid-like molecules	Glycerolipids	Triradylcglycerols	Aliphatic acyclic compounds	Alkyldiacylglycerols	NA	TG(20:3(5Z,8Z,11Z)/20:5(5Z,8Z,11Z,14Z,17Z)/o-18:0)
meta_1160	1160	916.214	TRUE	0.398627	6000.96	-0.00203537	C31H50N7O17P3S	-H(-)	19	HMDB0001168	2,4-Decadienoyl-CoA	Lipids and lipid-like molecules	Fatty Acyls	Fatty acyl thioesters	Aromatic heteropolycyclic compounds	Medium-chain 2-enoyl CoAs	NA	2,4-Decadienoyl-CoA
meta_1161	1161	917.237	TRUE	0.58212	5911.73	-0.0016218	C42H46O23	-H(-)	37	HMDB0040484	Quercetin 3-(6-[4-glucosyl-p-coumaryl]glucosyl)(1->2)-rhamnoside	Phenylpropanoids and polyketides	Flavonoids	Flavonoid glycosides	Aromatic heteropolycyclic compounds	Flavonoid-3-O-glycosides	NA	Quercetin 3-(6-[4-glucosyl-p-coumaryl]glucosyl)(1->2)-rhamnoside
meta_1162	1162	917.258	TRUE	0.5006	5786.75	-0.00112628	C39H50O25	-H(-)	82	HMDB0032009	Quercetin 3-(glucosyl-(1->4)-rhamnoside) 7-rutinoside	Phenylpropanoids and polyketides	Flavonoids	Flavonoid glycosides	Aromatic heteropolycyclic compounds	Flavonoid-7-O-glycosides	NA	Quercetin 3-(glucosyl-(1->4)-rhamnoside) 7-rutinoside
meta_1163	1163	921.79	TRUE	0.605764	7021.27	0.00119326	C60H106O6	-H(-)	73	HMDB0043097	TG(15:0/20:0/22:5(4Z,7Z,10Z,13Z,16Z))	Lipids and lipid-like molecules	Glycerolipids	Triradylcglycerols	Aliphatic acyclic compounds	Triacylglycerols	NA	TG(15:0/20:0/22:5(4Z,7Z,10Z,13Z,16Z))
meta_1164	1164	924.166	TRUE	0.625923	7741.71	0.000127511	C28H46N7O20P3S	-H(-)	100	HMDB0012155	3-Hydroxypimelyl-CoA	Lipids and lipid-like molecules	Fatty Acyls	Fatty acyl thioesters	Aromatic heteropolycyclic compounds	3-hydroxyacyl CoAs	NA	3-Hydroxypimelyl-CoA
meta_1165	1165	925.461	TRUE	0.472701	6791.97	-0.00228104	C50H70O16	-H(-)	13	HMDB0037911	Tragopogonsaponin B	Lipids and lipid-like molecules	Prenol lipids	Terpene glycosides	Aromatic heteropolycyclic compounds	Triterpene saponins	NA	Tragopogonsaponin B
meta_1166	1166	931.253	TRUE	0.695706	7695.06	-0.00137282	C43H48O23	-H(-)	55	HMDB0038044	Isovitexin 2''-(6'''-feruloylglucoside) 4'-glucoside	Phenylpropanoids and polyketides	Flavonoids	Flavonoid glycosides	Aromatic heteropolycyclic compounds	Flavonoid O-glycosides	NA	Isovitexin 2''-(6'''-feruloylglucoside) 4'-glucoside
meta_1167	1167	931.777	TRUE	0.561216	8661.47	-0.000821027	C61H104O6	-H(-)	100	HMDB0005471	TG(18:2(9Z,12Z)/20:1(11Z)/20:4(5Z,8Z,11Z,14Z))	Lipids and lipid-like molecules	Glycerolipids	Triradylcglycerols	Aliphatic acyclic compounds	Triacylglycerols	NA	TG(18:2(9Z,12Z)/20:1(11Z)/20:4(5Z,8Z,11Z,14Z))
meta_1168	1168	933.205	TRUE	0.672511	10067	-0.00227912	C30H49N8O18P3S	-H(-)	13	HMDB0006403	Pseudoecgonyl-CoA	Lipids and lipid-like molecules	Fatty Acyls	Fatty acyl thioesters	Aromatic heteropolycyclic compounds	Acyl CoAs	NA	Pseudoecgonyl-CoA
meta_1169	1169	943.872	TRUE	0.679314	22778.4	-0.00220177	C61H116O6	-H(-)	14	HMDB0005400	TG(18:0/20:0/20:1(11Z))	Lipids and lipid-like molecules	Glycerolipids	Triradylcglycerols	Aliphatic acyclic compounds	Triacylglycerols	NA	TG(18:0/20:0/20:1(11Z))
meta_1170	1170	947.522	TRUE	0.819204	18954.3	0.000465645	C47H80O19	-H(-)	100	HMDB0032068	Notoginsenoside H	Lipids and lipid-like molecules	Prenol lipids	Triterpenoids	Aliphatic heteropolycyclic compounds	Triterpenoids	NA	Notoginsenoside H
meta_1171	1171	967.53	TRUE	0.659764	15955	0.00178327	C47H86O16P2	-H(-)	28	HMDB0009989	PIP(18:2(9Z,12Z)/20:1(11Z))	Lipids and lipid-like molecules	Glycerophospholipids	Glycerophosphoinositol phosphates	Aliphatic homomonocyclic compounds	Glycerophosphoinositol phosphates	NA	PIP(18:2(9Z,12Z)/20:1(11Z))
meta_1172	1172	969.507	TRUE	0.734423	16236.7	-0.000604913	C49H78O19	-H(-)	100	HMDB0041021	Calenduloside H methyl ester	Lipids and lipid-like molecules	Prenol lipids	Terpene glycosides	Aliphatic heteropolycyclic compounds	Triterpene saponins	NA	Calenduloside H methyl ester
meta_1173	1173	969.882	TRUE	0.0869295	21023.2	-0.00220479	C70H114O	-H(-)	14	HMDB0005181	Dolichol-14	Lipids and lipid-like molecules	Prenol lipids	Polyprenols	Aliphatic acyclic compounds	Polyprenols	NA	Dolichol-14
meta_1174	1174	975.745	TRUE	0.502823	12035.2	-0.000624693	C65H100O6	-H(-)	100	HMDB0010547	TG(22:5(7Z,10Z,13Z,16Z,19Z)/18:2(9Z,12Z)/22:6(4Z,7Z,10Z,13Z,16Z,19Z))	Lipids and lipid-like molecules	Glycerolipids	Triradylcglycerols	Aliphatic acyclic compounds	Triacylglycerols	NA	TG(22:5(7Z,10Z,13Z,16Z,19Z)/18:2(9Z,12Z)/22:6(4Z,7Z,10Z,13Z,16Z,19Z))
meta_1175	1175	983.935	TRUE	0.325715	17281.1	0.00232345	C65H124O5	-H(-)	12	HMDB0046780	TG(22:0/22:2(13Z,16Z)/o-18:0)	Lipids and lipid-like molecules	Glycerolipids	Triradylcglycerols	Aliphatic acyclic compounds	Alkyldiacylglycerols	NA	TG(22:0/22:2(13Z,16Z)/o-18:0)
meta_1176	1176	986.751	TRUE	0.621582	13362.9	0.000293675	C55H105NO13	-H(-)	100	HMDB0004841	Galabiosylceramide (d18:1/25:0)	Lipids and lipid-like molecules	Sphingolipids	Glycosphingolipids	Aliphatic heteromonocyclic compounds	Glycosyl-N-acylsphingosines	NA	Galabiosylceramide (d18:1/25:0)
meta_1177	1177	993.687	TRUE	0.545822	9272.32	-5e-05	C60H100O7P2	-H(-)	100	HMDB0012217	Dodecaprenyl diphosphate	Lipids and lipid-like molecules	Prenol lipids	Polyprenols	Aliphatic acyclic compounds	Bactoprenol diphosphates	NA	Dodecaprenyl diphosphate
meta_1178	1178	1001.57	TRUE	0.31465	10186.4	-0.000815128	C48H92O17P2	-H(-)	100	HMDB0116807	CL(8:0/8:0/8:0/15:0)	Lipids and lipid-like molecules	Glycerophospholipids	Glycerophosphoglycerophosphoglycerols	Aliphatic acyclic compounds	Cardiolipins	NA	CL(8:0/8:0/8:0/15:0)
meta_1179	1179	1003.77	TRUE	0.339251	16701.3	0.00240484	C67H104O6	-H(-)	10	HMDB0050849	TG(20:1(11Z)/22:6(4Z,7Z,10Z,13Z,16Z,19Z)/22:6(4Z,7Z,10Z,13Z,16Z,19Z))	Lipids and lipid-like molecules	Glycerolipids	Triradylcglycerols	Aliphatic acyclic compounds	Triacylglycerols	NA	TG(20:1(11Z)/22:6(4Z,7Z,10Z,13Z,16Z,19Z)/22:6(4Z,7Z,10Z,13Z,16Z,19Z))
meta_1180	1180	1014.29	TRUE	0.64634	10034.7	-0.00115299	C37H60N7O18P3S	-H(-)	78	HMDB0011114	OPC6-CoA	Lipids and lipid-like molecules	Fatty Acyls	Fatty acyl thioesters	Aromatic heteropolycyclic compounds	2,3,4-saturated fatty acyl CoAs	NA	OPC6-CoA
meta_1181	1181	1018.35	TRUE	0.234418	10984.4	-0.001696	C38H68N7O17P3S	-H(-)	33	HMDB0006497	Heptadecanoyl CoA	Lipids and lipid-like molecules	Fatty Acyls	Fatty acyl thioesters	Aromatic heteropolycyclic compounds	Long-chain fatty acyl CoAs	NA	Heptadecanoyl CoA
meta_1182	1182	1019.3	TRUE	0.369553	11602	0.00119235	C47H56O25	-H(-)	73	HMDB0036256	Gladiatoside B3	Phenylpropanoids and polyketides	Flavonoids	Flavonoid glycosides	Aromatic heteropolycyclic compounds	Flavonoid-7-O-glycosides	NA	Gladiatoside B3
meta_1183	1183	1023.52	TRUE	0.316452	8791.34	0.00169611	C52H80O20	-H(-)	33	HMDB0035342	TR-Saponin B	Lipids and lipid-like molecules	Prenol lipids	Terpene glycosides	Aliphatic heteropolycyclic compounds	Triterpene saponins	NA	TR-Saponin B

## Sheet: S3_78dietary_factors
factor	description	unit	origin	format	mean_female	sd_female	mean_male	sd_male	mean_all	sd_all	log10 (value+1) transformed Y/N
alcohol_products	alcohol containing beverages	g/day	questionnaire processed	mean (SD)	1.4547	0.777737	1.87503	0.714016	1.63176	0.779375	Y
breads	breads	g/day	questionnaire processed	mean (SD)	2.00443	0.27745	2.14266	0.270341	2.06266	0.282719	Y
cereals	cereals	g/day	questionnaire processed	mean (SD)	0.430366	0.558837	0.413821	0.611798	0.423396	0.581508	Y
cheese	cheese	g/day	questionnaire processed	mean (SD)	1.31308	0.435425	1.30339	0.496029	1.309	0.461721	Y
coffee	coffee	g/day	questionnaire processed	mean (SD)	2.10531	0.946266	2.3977	0.761957	2.22848	0.884859	Y
dairy	dairy	g/day	questionnaire processed	mean (SD)	2.28322	0.481061	2.34227	0.418967	2.3081	0.456661	Y
spreads	spreads	g/day	questionnaire processed	mean (SD)	1.08873	0.490577	1.24005	0.501638	1.15248	0.500641	Y
eggs	eggs	g/day	questionnaire processed	mean (SD)	0.999932	0.389952	1.01874	0.43364	1.00785	0.40883	Y
fish	fish	g/day	questionnaire processed	mean (SD)	0.998494	0.465389	0.966299	0.485083	0.984932	0.473824	Y
fruits	fruits	g/day	questionnaire processed	mean (SD)	2.23193	0.379242	2.21201	0.436349	2.22354	0.404202	Y
legumes	legumes	g/day	questionnaire processed	mean (SD)	0.541489	0.568418	0.68401	0.615183	0.601526	0.592483	Y
meat	meat	g/day	questionnaire processed	mean (SD)	1.75962	0.402832	1.90241	0.352601	1.81977	0.388756	Y
nonalc_drinks	non-alcoholic beverages	g/day	questionnaire processed	mean (SD)	1.55556	0.866539	1.81974	0.773528	1.66685	0.83847	Y
nuts	nuts	g/day	questionnaire processed	mean (SD)	0.828611	0.47024	1.02716	0.49525	0.912248	0.490606	Y
pasta	pasta	g/day	questionnaire processed	mean (SD)	1.22759	0.422621	1.28947	0.476505	1.25366	0.446941	Y
pastry	pastry	g/day	questionnaire processed	mean (SD)	1.36813	0.393521	1.36816	0.406139	1.36814	0.398694	Y
potatos	potatoes	g/day	questionnaire processed	mean (SD)	1.70242	0.378338	1.84625	0.347965	1.76301	0.37252	Y
ready_meal	ready meal	g/day	questionnaire processed	mean (SD)	1.46238	0.558406	1.61516	0.544109	1.52674	0.557302	Y
rice	rice	g/day	questionnaire processed	mean (SD)	1.14902	0.506398	1.27422	0.495451	1.20176	0.505378	Y
sauces	sauces	g/day	questionnaire processed	mean (SD)	1.00785	0.418749	1.05159	0.457181	1.02628	0.435676	Y
savoury_snacks	savoury snacks	g/day	questionnaire processed	mean (SD)	1.00178	0.446709	1.10082	0.465232	1.0435	0.457011	Y
soup	soup	g/day	questionnaire processed	mean (SD)	1.37564	0.571626	1.46382	0.573537	1.41278	0.573815	Y
sugar_sweets	sugar and sweets	g/day	questionnaire processed	mean (SD)	1.28215	0.442002	1.3868	0.467934	1.32623	0.455829	Y
tea	tea	g/day	questionnaire processed	mean (SD)	2.26057	0.603033	1.76814	0.859115	2.05313	0.761578	Y
vegetables	vegetables	g/day	questionnaire processed	mean (SD)	1.96662	0.306355	1.92931	0.336454	1.95091	0.319756	Y
lowenergy	special diet low in energy (calories)	yes	questionnaire processed	yes (no)	36	574	5	439	41	1013	N
lowfat	special diet low in fat	yes	questionnaire processed	yes (no)	14	596	8	436	22	1032	N
lownatrium	special diet low in sodium	yes	questionnaire processed	yes (no)	4	606	2	442	6	1048	N
high.fiber	special diet high in fiber	yes	questionnaire processed	yes (no)	8	602	5	439	13	1041	N
vegetarian	special diet vegetarian	yes	questionnaire processed	yes (no)	56	554	21	423	77	977	N
alcohol.g	nutrient alcohol	g/day	questionnaire processed	mean (SD)	0.260269	1.12761	0.644302	0.934034	0.422044	1.06696	Y
kcal	nutrient energy	kcal	questionnaire processed	mean (SD)	3.22773	0.118177	3.33013	0.122003	3.27086	0.129993	Y
protein.total	nutrient total protein	g/day	questionnaire processed	mean (SD)	1.81753	0.105511	1.89998	0.118953	1.85226	0.118533	Y
protein.plant	nutrient plant derived protein	g/day	questionnaire processed	mean (SD)	1.40945	0.128787	1.52349	0.139865	1.45749	0.144899	Y
protein.animal	nutrient animal derived protein	g/day	questionnaire processed	mean (SD)	1.58841	0.148213	1.64991	0.151958	1.61432	0.152782	Y
fat.total	nutrient total fat	g/day	questionnaire processed	mean (SD)	1.81927	0.145768	1.91887	0.152723	1.86123	0.156597	Y
carbohydrates.total	nutrient total carbohydrates	g/day	questionnaire processed	mean (SD)	2.28504	0.138253	2.38899	0.133874	2.32883	0.14571	Y
how_often_breakfast	frequency of breakfast consumption	7 point scale	questionnaire	mean (SD)	5.68689	0.970158	5.60811	1.04288	5.6537	1.00171	N
low_carb_diet	special diet low in carbohydrates	yes	questionnaire	yes (no)	16	594	2	442	18	1036	N
protein_rich_diet	special diet rich in proteins	yes	questionnaire	yes (no)	6	604	2	442	8	1046	N
weight_related_diet	special diet related to weight	yes	questionnaire	yes (no)	34	576	6	438	40	1014	N
gluten_free_diet	special diet gluten free	yes	questionnaire	yes (no)	7	603	2	442	9	1045	N
how_often_coffee	frequency of coffee consumption	7 point scale	questionnaire	mean (SD)	4.78852	2.16621	5.30856	1.67489	5.00759	1.98999	N
how_often_fruits	frequency of fruit consumption	7 point scale	questionnaire	mean (SD)	4.90328	1.31512	4.62162	1.46319	4.78463	1.38576	N
how_often_meat	frequency of meat consumption	7 point scale	questionnaire	mean (SD)	4.57377	1.29238	4.76577	1.20537	4.65465	1.25945	N
how_often_tea	frequency of tea consumption	7 point scale	questionnaire	mean (SD)	5.14754	1.4445	4.0473	2.12796	4.68406	1.84586	N
how_often_vegetables	frequency of vegetable consumption	7 point scale	questionnaire	mean (SD)	5.07049	0.939875	4.76802	1.0486	4.94307	0.997901	N
how_often_milk_or_butterrmilk	frequency of milk/buttermilk consumption	7 point scale	questionnaire	mean (SD)	3.54918	2.30478	3.73423	2.25599	3.62713	2.28511	N
wholefat_milk	frequency of whole fat milk consumption	4 point scale	questionnaire processed	mean (SD)	0.132787	0.512959	0.184685	0.583552	0.154649	0.54415	N
halffat_milk	frequency of half fat milk consumption	4 point scale	questionnaire processed	mean (SD)	1.37377	1.31854	1.54054	1.32715	1.44402	1.32411	N
lowfat_milk	frequency of low fat milk consumption	4 point scale	questionnaire processed	mean (SD)	0.163934	0.600501	0.157658	0.583761	0.16129	0.593236	N
buttermilk	frequency of buttermilk consumption	4 point scale	questionnaire processed	mean (SD)	0.772131	1.10182	0.583333	1.02993	0.6926	1.07568	N
how_often_fish	frequency of fish consumption	7 point scale	questionnaire	mean (SD)	2.25246	1.20148	2.11486	1.23634	2.1945	1.2176	N
how_often_alcohol	frequency of alcohol containing beverages consumption	7 point scale	questionnaire	mean (SD)	3.15082	1.87198	3.83333	1.67552	3.43833	1.82249	N
alcohol.free_beer	frequency of alcohol free beer consumption	4 point scale	questionnaire processed	mean (SD)	0.0852459	0.356887	0.103604	0.377811	0.0929791	0.365782	N
beer	frequency of beer consumption	4 point scale	questionnaire processed	mean (SD)	0.467213	0.68988	1.50225	1.03112	0.903226	0.991957	N
red_wine	frequency of red wine consumption	4 point scale	questionnaire processed	mean (SD)	0.878689	0.952934	0.727477	0.836559	0.814991	0.908399	N
white_wine	frequency of white wine consumption	4 point scale	questionnaire processed	mean (SD)	0.896721	0.919139	0.421171	0.662169	0.696395	0.853375	N
rose_wine	frequency of rose wine consumption	4 point scale	questionnaire processed	mean (SD)	0.539344	0.731146	0.245495	0.494304	0.41556	0.658053	N
how_often_bread	frequency of bread consumption	7 point scale	questionnaire	mean (SD)	5.45738	1.13418	5.58559	0.980335	5.51139	1.07345	N
how_often_eggs	frequency of eggs consumption	7 point scale	questionnaire	mean (SD)	3.05738	1.16108	3.00225	1.25434	3.03416	1.20097	N
how_often_muesli	frequency of muesli consumption	7 point scale	questionnaire	mean (SD)	2.01475	2.20273	1.67568	2.20265	1.87192	2.20801	N
how_often_yoghurt_milk_based_puddings	frequency of yoghurt/milk-based puddings consumption	7 point scale	questionnaire	mean (SD)	4.1541	1.85408	4.21847	1.87644	4.18121	1.86292	N
how_often_icecream	frequency of ice cream consumption	7 point scale	questionnaire	mean (SD)	1.41967	1.17902	1.4482	1.14008	1.43169	1.16232	N
how_often_pizza	frequency of pizza consumption	7 point scale	questionnaire	mean (SD)	1.08361	0.919356	1.33333	1.00188	1.1888	0.962462	N
how_often_pasta	frequency of pasta consumption	7 point scale	questionnaire	mean (SD)	2.8918	1.0743	2.83784	1.12666	2.86907	1.09646	N
how_often_rice	frequency of rice consumption	7 point scale	questionnaire	mean (SD)	2.45082	1.23776	2.51351	1.18008	2.47723	1.21363	N
how_often_pulses	frequency of pulses consumption	7 point scale	questionnaire	mean (SD)	1	1.16461	1.18018	1.19969	1.0759	1.1823	N
how_often_boiled_potatos	frequency of boiled potatoes consumption	7 point scale	questionnaire	mean (SD)	3.38197	1.49877	3.49324	1.38924	3.42884	1.454	N
how_often_baked_fried_potatoes	frequency of baked/fried potatoes consumption	7 point scale	questionnaire	mean (SD)	2.57541	1.04027	2.74324	0.995169	2.64611	1.02439	N
how_often_soda	frequency of soda consumption	7 point scale	questionnaire	mean (SD)	3.12951	2.04978	3.71622	1.90416	3.37666	2.00982	N
soda_with_sugar	frequency of sugar sweetened soda consumption	4 point scale	questionnaire processed	mean (SD)	0.990164	1.05041	1.43468	1.08458	1.17742	1.08684	N
soda_no_sugar	frequency of not sugar sweetened soda consumption	4 point scale	questionnaire processed	mean (SD)	1.11311	1.14125	1	1.04741	1.06546	1.1036	N
how_often_juice	frequency of juice consumption	7 point scale	questionnaire	mean (SD)	2.73934	1.8647	2.96622	1.90075	2.83491	1.88241	N
how_often_chocomilk_sweetened_milk_drinks	frequency of chocolate milk/sweetened sour/milk consumption	7 point scale	questionnaire	mean (SD)	1.7623	1.98952	1.70045	1.9791	1.73624	1.98443	N
how_often_chocolade	frequency of chocolate consumption	7 point scale	questionnaire	mean (SD)	2.60328	1.62493	2.46847	1.52966	2.54649	1.58615	N
how_often_nuts	frequency of nut consumption	7 point scale	questionnaire	mean (SD)	2.07705	1.48743	2.36486	1.48194	2.19829	1.49121	N
how_often_crisps_savory_crackers	frequency of chips, savory snacks and cracker consumption	7 point scale	questionnaire	mean (SD)	2.12131	1.32985	2.16892	1.32038	2.14137	1.32545	N

## Sheet: S4_variance_all_together
type	feature_number_discovery	R2_discovery	adjusted_R2_discovery	Pval_discovery	feature_number_replication	R2_replication	Pval_replication
intrinsic (age+sex+BMI+smoking)	4	0.0493883	0.0457635	0.000999001	3	0.0408501	0.000999001
diet	41	0.0865851	0.0495791	0.000999001	-	-	-
genetics	35	0.0451621	0.0123337	0.000999001	30	0.1029	0.771229
microbiome	89	0.115544	0.0338876	0.000999001	21	0.0956558	0.000999001
all (intrinsic+diet+genetics+microbiome)	169	0.261652	0.120497	0.000999001	-	-	-

## Sheet: S5_association_diet
meta	name	super_class	class	sub_class	molecular_framework	direct_parent	diet	r_LLD_base_discovery	Pval_LLD_base_discovery	FDR_BH_LLD_base_discovery
meta_536	(2E)-3-[3-(sulfooxy)phenyl]prop-2-enoic acid	Phenylpropanoids and polyketides	Cinnamic acids and derivatives	Hydroxycinnamic acids and derivatives	Aromatic homomonocyclic compounds	Coumaric acids and derivatives	coffee_log	0.571964	1.31871e-92	1.21682e-87
meta_365	Quinic acid	Organic oxygen compounds	Organooxygen compounds	Alcohols and polyols	Aliphatic homomonocyclic compounds	Quinic acids and derivatives	coffee_log	0.539112	1.63493e-80	7.54307e-76
meta_377	2,6-Dimethoxy-4-propylphenol	Benzenoids	Phenols	Methoxyphenols	Aromatic homomonocyclic compounds	Methoxyphenols	how_often_fish	0.527521	1.47953e-76	4.55074e-72
meta_536	(2E)-3-[3-(sulfooxy)phenyl]prop-2-enoic acid	Phenylpropanoids and polyketides	Cinnamic acids and derivatives	Hydroxycinnamic acids and derivatives	Aromatic homomonocyclic compounds	Coumaric acids and derivatives	how_often_coffee	0.521945	1.04583e-74	2.41256e-70
meta_529	3-(3,4,5-Trimethoxyphenyl)propanoic acid	Phenylpropanoids and polyketides	Phenylpropanoic acids	Not classified	Aromatic homomonocyclic compounds	Phenylpropanoic acids	how_often_fish	0.515529	1.27419e-72	2.35149e-68
meta_221	(-)-trans-Carveol	Lipids and lipid-like molecules	Prenol lipids	Monoterpenoids	Aliphatic homomonocyclic compounds	Menthane monoterpenoids	how_often_fish	0.494796	3.53793e-66	5.44098e-62
meta_335	3-Methyluric acid	Organoheterocyclic compounds	Imidazopyrimidines	Purines and purine derivatives	Aromatic heteropolycyclic compounds	Xanthines	coffee_log	0.491814	2.75248e-65	3.62832e-61
meta_380	5-Acetylamino-6-amino-3-methyluracil	Organic nitrogen compounds	Organonitrogen compounds	N-arylamides	Aromatic heteromonocyclic compounds	N-acetylarylamines	coffee_log	0.483991	5.43424e-63	6.26799e-59
meta_439	3,4-Methyleneazelaic acid	Lipids and lipid-like molecules	Fatty Acyls	Fatty acids and conjugates	Aliphatic acyclic compounds	Medium-chain fatty acids	how_often_fish	0.478815	1.66669e-61	1.7088e-57
meta_766	Droperidol	Organic oxygen compounds	Organooxygen compounds	Carbonyl compounds	Aromatic heteropolycyclic compounds	Alkyl-phenylketones	beer	0.475769	1.21537e-60	1.12147e-56
meta_438	Glycyl-Histidine	Organic acids and derivatives	Carboxylic acids and derivatives	Amino acids, peptides, and analogues	Aromatic heteromonocyclic compounds	Dipeptides	coffee_log	0.470252	4.22202e-59	3.25145e-55
meta_766	Droperidol	Organic oxygen compounds	Organooxygen compounds	Carbonyl compounds	Aromatic heteropolycyclic compounds	Alkyl-phenylketones	alcohol_products_log	0.470172	4.44255e-59	3.25145e-55
meta_789	(2S,4S,6S)-2-[2-(4-Hydroxy-3-meyhoxyphenyl)ethyl]tetrahydro-6-(4,5-dihydroxy-3-methoxyphenyl)-2H-pyran-4-ol	Phenylpropanoids and polyketides	Diarylheptanoids	Linear diarylheptanoids	Aromatic heteromonocyclic compounds	Linear diarylheptanoids	alcohol_products_log	0.470124	4.58079e-59	3.25145e-55
meta_764	Pentosidine	Organic acids and derivatives	Carboxylic acids and derivatives	Amino acids, peptides, and analogues	Aromatic heteropolycyclic compounds	L-alpha-amino acids	alcohol_products_log	0.462626	5.12686e-57	3.36462e-53
meta_365	Quinic acid	Organic oxygen compounds	Organooxygen compounds	Alcohols and polyols	Aliphatic homomonocyclic compounds	Quinic acids and derivatives	how_often_coffee	0.462521	5.4695e-57	3.36462e-53
meta_333	D-Glucose	Organic oxygen compounds	Organooxygen compounds	Carbohydrates and carbohydrate conjugates	Aliphatic heteromonocyclic compounds	Hexoses	coffee_log	0.460128	2.40478e-56	1.38687e-52
meta_721	4,13,14-trihydroxy-9-oxo-8,17-dioxatetracyclo[8.7.0.0虏,伔0鹿鹿,鹿伓輍eptadeca-1(10),2,4,6,11(16),12,14-heptaen-5-yl acetate	Phenylpropanoids and polyketides	Isoflavonoids	Coumestans	Aromatic heteropolycyclic compounds	Coumestans	coffee_log	0.458889	5.14997e-56	2.79534e-52
meta_789	(2S,4S,6S)-2-[2-(4-Hydroxy-3-meyhoxyphenyl)ethyl]tetrahydro-6-(4,5-dihydroxy-3-methoxyphenyl)-2H-pyran-4-ol	Phenylpropanoids and polyketides	Diarylheptanoids	Linear diarylheptanoids	Aromatic heteromonocyclic compounds	Linear diarylheptanoids	beer	0.456544	2.16058e-55	1.10759e-51
meta_377	2,6-Dimethoxy-4-propylphenol	Benzenoids	Phenols	Methoxyphenols	Aromatic homomonocyclic compounds	Methoxyphenols	fish_log	0.455414	4.29314e-55	2.08498e-51
meta_376	1,3-Dimethyluric acid	Organoheterocyclic compounds	Imidazopyrimidines	Purines and purine derivatives	Aromatic heteropolycyclic compounds	Xanthines	coffee_log	0.451759	3.8899e-54	1.79468e-50
meta_269	Phenylpyruvic acid	Benzenoids	Benzene and substituted derivatives	Phenylpyruvic acid derivatives	Aromatic homomonocyclic compounds	Phenylpyruvic acid derivatives	coffee_log	0.445841	1.30378e-52	5.72883e-49
meta_573	L-beta-aspartyl-L-glutamic acid	Organic acids and derivatives	Peptidomimetics	Hybrid peptides	Aliphatic acyclic compounds	Hybrid peptides	how_often_fish	0.445392	1.69644e-52	7.11534e-49
meta_40	2-Hydroxypyridine	Organoheterocyclic compounds	Pyridines and derivatives	Hydropyridines	Aromatic heteromonocyclic compounds	Pyridinones	coffee_log	0.442676	8.29066e-52	3.32614e-48
meta_529	3-(3,4,5-Trimethoxyphenyl)propanoic acid	Phenylpropanoids and polyketides	Phenylpropanoic acids	Not classified	Aromatic homomonocyclic compounds	Phenylpropanoic acids	fish_log	0.441167	1.98846e-51	7.64514e-48
meta_514	Dillapional	Phenylpropanoids and polyketides	Cinnamaldehydes	Not classified	Aromatic heteropolycyclic compounds	Cinnamaldehydes	coffee_log	0.44077	2.50207e-51	9.23504e-48
meta_344	(+/-)-3-[(2-methyl-3-furyl)thio]-2-butanone	Organosulfur compounds	Thioethers	Alkylarylthioethers	Aromatic heteromonocyclic compounds	Alkylarylthioethers	coffee_log	0.425207	1.59686e-47	5.66724e-44
meta_221	(-)-trans-Carveol	Lipids and lipid-like molecules	Prenol lipids	Monoterpenoids	Aliphatic homomonocyclic compounds	Menthane monoterpenoids	fish_log	0.424793	2.00282e-47	6.84476e-44
meta_936	3,4,5-trihydroxy-6-[(2-{9-[(3-methylbut-2-enoyl)oxy]-2-oxo-2H,8H,9H-furo[2,3-h]chromen-8-yl}propan-2-yl)oxy]oxane-2-carboxylic acid	Phenylpropanoids and polyketides	Coumarins and derivatives	Furanocoumarins	Aromatic heteropolycyclic compounds	Angular furanocoumarins	coffee_log	0.423319	4.48213e-47	1.47709e-43
meta_790	Pteroside Z	Benzenoids	Indanes	Indanones	Aromatic heteropolycyclic compounds	Indanones	alcohol_products_log	0.418876	4.95392e-46	1.57627e-42
meta_668	Syndesine	Organic acids and derivatives	Carboxylic acids and derivatives	Amino acids, peptides, and analogues	Aliphatic acyclic compounds	Alpha amino acids	alcohol.g_log	0.416796	1.50764e-45	4.63721e-42
meta_438	Glycyl-Histidine	Organic acids and derivatives	Carboxylic acids and derivatives	Amino acids, peptides, and analogues	Aromatic heteromonocyclic compounds	Dipeptides	how_often_coffee	0.416148	2.1279e-45	6.33388e-42
meta_439	3,4-Methyleneazelaic acid	Lipids and lipid-like molecules	Fatty Acyls	Fatty acids and conjugates	Aliphatic acyclic compounds	Medium-chain fatty acids	fish_log	0.415652	2.77084e-45	7.98988e-42
meta_370	trans-Ferulic acid	Phenylpropanoids and polyketides	Cinnamic acids and derivatives	Hydroxycinnamic acids and derivatives	Aromatic homomonocyclic compounds	Hydroxycinnamic acids	coffee_log	0.413941	6.85213e-45	1.91598e-41
meta_325	4-Methoxycinnamic acid	Phenylpropanoids and polyketides	Cinnamic acids and derivatives	Cinnamic acids	Aromatic homomonocyclic compounds	Cinnamic acids	coffee_log	0.412974	1.14101e-44	3.09663e-41
meta_810	[4-(5-hydroxy-7-methoxy-8-methyl-4-oxo-4H-chromen-3-yl)-2-methoxyphenyl]oxidanesulfonic acid	Phenylpropanoids and polyketides	Isoflavonoids	O-methylated isoflavonoids	Aromatic heteropolycyclic compounds	7-O-methylisoflavones	coffee_log	0.411829	2.08154e-44	5.48777e-41
meta_668	Syndesine	Organic acids and derivatives	Carboxylic acids and derivatives	Amino acids, peptides, and analogues	Aliphatic acyclic compounds	Alpha amino acids	alcohol_products_log	0.411098	3.05237e-44	7.82375e-41
meta_530	L-Gizzerosine	Organic acids and derivatives	Carboxylic acids and derivatives	Amino acids, peptides, and analogues	Aromatic heteromonocyclic compounds	Alpha amino acids	how_often_fish	0.4094	7.39542e-44	1.84434e-40
meta_333	D-Glucose	Organic oxygen compounds	Organooxygen compounds	Carbohydrates and carbohydrate conjugates	Aliphatic heteromonocyclic compounds	Hexoses	how_often_coffee	0.406395	3.49843e-43	8.49512e-40
meta_994	Glycerol triundecanoate	Lipids and lipid-like molecules	Glycerolipids	Triradylcglycerols	Aliphatic acyclic compounds	Triacylglycerols	how_often_crisps_savory_crackers	0.404595	8.81065e-43	2.0846e-39
meta_955	TG(8:0/8:0/a-13:0)[rac]	Lipids and lipid-like molecules	Glycerolipids	Triradylcglycerols	Aliphatic acyclic compounds	Triacylglycerols	how_often_crisps_savory_crackers	0.403898	1.25777e-42	2.90148e-39
meta_764	Pentosidine	Organic acids and derivatives	Carboxylic acids and derivatives	Amino acids, peptides, and analogues	Aromatic heteropolycyclic compounds	L-alpha-amino acids	beer	0.402072	3.18423e-42	7.16639e-39
meta_376	1,3-Dimethyluric acid	Organoheterocyclic compounds	Imidazopyrimidines	Purines and purine derivatives	Aromatic heteropolycyclic compounds	Xanthines	how_often_coffee	0.399694	1.05765e-41	2.32366e-38
meta_337	Amyl 2-furoate	Organoheterocyclic compounds	Furans	Furoic acid derivatives	Aromatic heteromonocyclic compounds	Furoic acid derivatives	coffee_log	0.398395	2.02957e-41	4.35526e-38
meta_1124	PG(18:0/22:4(7Z,10Z,13Z,16Z))	Lipids and lipid-like molecules	Glycerophospholipids	Glycerophosphoglycerols	Aliphatic acyclic compounds	Phosphatidylglycerols	how_often_fish	0.393442	2.37293e-40	4.97635e-37
meta_764	Pentosidine	Organic acids and derivatives	Carboxylic acids and derivatives	Amino acids, peptides, and analogues	Aromatic heteropolycyclic compounds	L-alpha-amino acids	alcohol.g_log	0.392854	3.16915e-40	6.49845e-37
meta_718	Dihydro-O-methylsterigmatocystin	Phenylpropanoids and polyketides	Sterigmatocystins	Not classified	Aromatic heteropolycyclic compounds	Sterigmatocystins	coffee_log	0.392024	4.76141e-40	9.55119e-37
meta_789	(2S,4S,6S)-2-[2-(4-Hydroxy-3-meyhoxyphenyl)ethyl]tetrahydro-6-(4,5-dihydroxy-3-methoxyphenyl)-2H-pyran-4-ol	Phenylpropanoids and polyketides	Diarylheptanoids	Linear diarylheptanoids	Aromatic heteromonocyclic compounds	Linear diarylheptanoids	alcohol.g_log	0.391362	6.58085e-40	1.292e-36
meta_380	5-Acetylamino-6-amino-3-methyluracil	Organic nitrogen compounds	Organonitrogen compounds	N-arylamides	Aromatic heteromonocyclic compounds	N-acetylarylamines	how_often_coffee	0.386023	8.73075e-39	1.67838e-35
meta_790	Pteroside Z	Benzenoids	Indanes	Indanones	Aromatic heteropolycyclic compounds	Indanones	beer	0.385241	1.26999e-38	2.39157e-35
meta_766	Droperidol	Organic oxygen compounds	Organooxygen compounds	Carbonyl compounds	Aromatic heteropolycyclic compounds	Alkyl-phenylketones	alcohol.g_log	0.38498	1.43935e-38	2.65629e-35
meta_993	Muricatetrocin C	Lipids and lipid-like molecules	Fatty Acyls	Fatty alcohols	Aliphatic heteromonocyclic compounds	Annonaceous acetogenins	how_often_crisps_savory_crackers	0.38422	2.06844e-38	3.74241e-35
meta_764	Pentosidine	Organic acids and derivatives	Carboxylic acids and derivatives	Amino acids, peptides, and analogues	Aromatic heteropolycyclic compounds	L-alpha-amino acids	how_often_alcohol	0.382613	4.44166e-38	7.88172e-35
meta_721	4,13,14-trihydroxy-9-oxo-8,17-dioxatetracyclo[8.7.0.0虏,伔0鹿鹿,鹿伓輍eptadeca-1(10),2,4,6,11(16),12,14-heptaen-5-yl acetate	Phenylpropanoids and polyketides	Isoflavonoids	Coumestans	Aromatic heteropolycyclic compounds	Coumestans	how_often_coffee	0.382447	4.80405e-38	8.36395e-35
meta_269	Phenylpyruvic acid	Benzenoids	Benzene and substituted derivatives	Phenylpyruvic acid derivatives	Aromatic homomonocyclic compounds	Phenylpyruvic acid derivatives	how_often_coffee	0.37961	1.83021e-37	3.12743e-34
meta_625	Luteolin	Phenylpropanoids and polyketides	Flavonoids	Flavones	Aromatic heteropolycyclic compounds	Flavones	coffee_log	0.377978	3.92894e-37	6.59162e-34
meta_335	3-Methyluric acid	Organoheterocyclic compounds	Imidazopyrimidines	Purines and purine derivatives	Aromatic heteropolycyclic compounds	Xanthines	how_often_coffee	0.374633	1.85315e-36	3.05352e-33
meta_573	L-beta-aspartyl-L-glutamic acid	Organic acids and derivatives	Peptidomimetics	Hybrid peptides	Aliphatic acyclic compounds	Hybrid peptides	fish_log	0.373852	2.65513e-36	4.29824e-33
meta_860	Glycinoeclepin A	Lipids and lipid-like molecules	Fatty Acyls	Fatty acids and conjugates	Aliphatic heteropolycyclic compounds	Heterocyclic fatty acids	beer	0.367482	4.80903e-35	7.65084e-32
meta_655	3-Oxooctadecanoic acid	Lipids and lipid-like molecules	Fatty Acyls	Fatty acids and conjugates	Aliphatic acyclic compounds	Long-chain fatty acids	how_often_crisps_savory_crackers	0.366752	6.67566e-35	1.04405e-31
meta_40	2-Hydroxypyridine	Organoheterocyclic compounds	Pyridines and derivatives	Hydropyridines	Aromatic heteromonocyclic compounds	Pyridinones	how_often_coffee	0.365398	1.2231e-34	1.881e-31
meta_936	3,4,5-trihydroxy-6-[(2-{9-[(3-methylbut-2-enoyl)oxy]-2-oxo-2H,8H,9H-furo[2,3-h]chromen-8-yl}propan-2-yl)oxy]oxane-2-carboxylic acid	Phenylpropanoids and polyketides	Coumarins and derivatives	Furanocoumarins	Aromatic heteropolycyclic compounds	Angular furanocoumarins	how_often_coffee	0.365127	1.38082e-34	2.08875e-31
meta_860	Glycinoeclepin A	Lipids and lipid-like molecules	Fatty Acyls	Fatty acids and conjugates	Aliphatic heteropolycyclic compounds	Heterocyclic fatty acids	alcohol_products_log	0.364543	1.7909e-34	2.66539e-31
meta_766	Droperidol	Organic oxygen compounds	Organooxygen compounds	Carbonyl compounds	Aromatic heteropolycyclic compounds	Alkyl-phenylketones	how_often_alcohol	0.363804	2.48708e-34	3.64275e-31
meta_163	Tyrosol	Benzenoids	Phenols	Tyrosols and derivatives	Aromatic homomonocyclic compounds	Tyrosols	coffee_log	0.362914	3.68997e-34	5.32013e-31
meta_325	4-Methoxycinnamic acid	Phenylpropanoids and polyketides	Cinnamic acids and derivatives	Cinnamic acids	Aromatic homomonocyclic compounds	Cinnamic acids	how_often_coffee	0.359563	1.61056e-33	2.28635e-30
meta_668	Syndesine	Organic acids and derivatives	Carboxylic acids and derivatives	Amino acids, peptides, and analogues	Aliphatic acyclic compounds	Alpha amino acids	how_often_alcohol	0.357034	4.84101e-33	6.76817e-30
meta_789	(2S,4S,6S)-2-[2-(4-Hydroxy-3-meyhoxyphenyl)ethyl]tetrahydro-6-(4,5-dihydroxy-3-methoxyphenyl)-2H-pyran-4-ol	Phenylpropanoids and polyketides	Diarylheptanoids	Linear diarylheptanoids	Aromatic heteromonocyclic compounds	Linear diarylheptanoids	how_often_alcohol	0.353938	1.83753e-32	2.53069e-29
meta_422	Ethyl beta-D-glucopyranoside	Organic oxygen compounds	Organooxygen compounds	Carbohydrates and carbohydrate conjugates	Aliphatic heteromonocyclic compounds	O-glycosyl compounds	how_often_alcohol	0.353764	1.97944e-32	2.68605e-29
meta_422	Ethyl beta-D-glucopyranoside	Organic oxygen compounds	Organooxygen compounds	Carbohydrates and carbohydrate conjugates	Aliphatic heteromonocyclic compounds	O-glycosyl compounds	alcohol.g_log	0.352996	2.74946e-32	3.67686e-29
meta_810	[4-(5-hydroxy-7-methoxy-8-methyl-4-oxo-4H-chromen-3-yl)-2-methoxyphenyl]oxidanesulfonic acid	Phenylpropanoids and polyketides	Isoflavonoids	O-methylated isoflavonoids	Aromatic heteropolycyclic compounds	7-O-methylisoflavones	how_often_coffee	0.351678	4.81935e-32	6.35287e-29
meta_790	Pteroside Z	Benzenoids	Indanes	Indanones	Aromatic heteropolycyclic compounds	Indanones	alcohol.g_log	0.350793	7.01811e-32	9.12098e-29
meta_422	Ethyl beta-D-glucopyranoside	Organic oxygen compounds	Organooxygen compounds	Carbohydrates and carbohydrate conjugates	Aliphatic heteromonocyclic compounds	O-glycosyl compounds	alcohol_products_log	0.347664	2.6214e-31	3.35954e-28
meta_1124	PG(18:0/22:4(7Z,10Z,13Z,16Z))	Lipids and lipid-like molecules	Glycerophospholipids	Glycerophosphoglycerols	Aliphatic acyclic compounds	Phosphatidylglycerols	fish_log	0.34561	6.17667e-31	7.80749e-28
meta_514	Dillapional	Phenylpropanoids and polyketides	Cinnamaldehydes	Not classified	Aromatic heteropolycyclic compounds	Cinnamaldehydes	how_often_coffee	0.345151	7.47454e-31	9.32035e-28
meta_596	3-Oxohexadecanoic acid	Lipids and lipid-like molecules	Fatty Acyls	Fatty acids and conjugates	Aliphatic acyclic compounds	Long-chain fatty acids	how_often_crisps_savory_crackers	0.344913	8.25309e-31	1.01539e-27
meta_457	Tyrosol 4-sulfate	Organic acids and derivatives	Organic sulfuric acids and derivatives	Arylsulfates	Aromatic homomonocyclic compounds	Phenylsulfates	coffee_log	0.344482	9.86396e-31	1.19761e-27
meta_601	5-(Hydroxyphenyl)-gamma-valerolactone-O-sulphate	Organic acids and derivatives	Organic sulfuric acids and derivatives	Arylsulfates	Aromatic heteromonocyclic compounds	Phenylsulfates	coffee_log	0.344074	1.16793e-30	1.39961e-27
meta_530	L-Gizzerosine	Organic acids and derivatives	Carboxylic acids and derivatives	Amino acids, peptides, and analogues	Aromatic heteromonocyclic compounds	Alpha amino acids	fish_log	0.343247	1.64291e-30	1.94356e-27
meta_697	13,14-dihydroxy-9-oxo-8,17-dioxatetracyclo[8.7.0.0虏,伔0鹿鹿,鹿伓輍eptadeca-1(10),2(7),3,5,11(16),12,14-heptaen-5-yl acetate	Phenylpropanoids and polyketides	Isoflavonoids	Coumestans	Aromatic heteropolycyclic compounds	Coumestans	coffee_log	0.341639	3.18154e-30	3.71612e-27
meta_992	Asparagoside B	Lipids and lipid-like molecules	Steroids and steroid derivatives	Steroidal glycosides	Aliphatic heteropolycyclic compounds	Steroidal saponins	how_often_crisps_savory_crackers	0.338985	9.38983e-30	1.08305e-26
meta_698	1,5-Dihydroxy-3-methoxy-2-prenylxanthone	Organoheterocyclic compounds	Benzopyrans	1-benzopyrans	Aromatic heteropolycyclic compounds	2-prenylated xanthones	coffee_log	0.337004	2.09236e-29	2.38359e-26
meta_344	(+/-)-3-[(2-methyl-3-furyl)thio]-2-butanone	Organosulfur compounds	Thioethers	Alkylarylthioethers	Aromatic heteromonocyclic compounds	Alkylarylthioethers	how_often_coffee	0.336405	2.66261e-29	2.99622e-26
meta_453	(5-ethenyl-2-hydroxyphenyl)oxidanesulfonic acid	Organic acids and derivatives	Organic sulfuric acids and derivatives	Arylsulfates	Aromatic homomonocyclic compounds	Phenylsulfates	coffee_log	0.335269	4.19993e-29	4.66921e-26
meta_790	Pteroside Z	Benzenoids	Indanes	Indanones	Aromatic heteropolycyclic compounds	Indanones	how_often_alcohol	0.333032	1.02454e-28	1.12546e-25
meta_367	Tocainide	Benzenoids	Benzene and substituted derivatives	Xylenes	Aromatic homomonocyclic compounds	m-Xylenes	coffee_log	0.331794	1.6726e-28	1.81573e-25
meta_811	{3-[(E)-2-[3,5-dihydroxy-4-(3-methylbut-2-en-1-yl)phenyl]ethenyl]-2,6-dihydroxyphenyl}oxidanesulfonic acid	Phenylpropanoids and polyketides	Stilbenes	Not classified	Aromatic homomonocyclic compounds	Stilbenes	coffee_log	0.331633	1.78229e-28	1.91231e-25
meta_522	2,2,4,4,-Tetramethyl-6-(1-oxopropyl)-1,3,5-cyclohexanetrione	Lipids and lipid-like molecules	Prenol lipids	Monoterpenoids	Aliphatic homomonocyclic compounds	Monocyclic monoterpenoids	alcohol_products_log	0.3274	9.36245e-28	9.93e-25
meta_382	Pyrimethanil	Benzenoids	Benzene and substituted derivatives	Aniline and substituted anilines	Aromatic heteromonocyclic compounds	Aniline and substituted anilines	coffee_log	0.325618	1.8677e-27	1.95841e-24
meta_718	Dihydro-O-methylsterigmatocystin	Phenylpropanoids and polyketides	Sterigmatocystins	Not classified	Aromatic heteropolycyclic compounds	Sterigmatocystins	how_often_coffee	0.324903	2.46113e-27	2.55166e-24
meta_833	Taraxinic acid glucosyl ester	Lipids and lipid-like molecules	Prenol lipids	Terpene lactones	Aliphatic heteropolycyclic compounds	Germacranolides and derivatives	alcohol_products_log	0.324765	2.59558e-27	2.66116e-24
meta_370	trans-Ferulic acid	Phenylpropanoids and polyketides	Cinnamic acids and derivatives	Hydroxycinnamic acids and derivatives	Aromatic homomonocyclic compounds	Hydroxycinnamic acids	how_often_coffee	0.323639	3.99971e-27	4.0557e-24
meta_518	Tyrosol 4-sulfate	Organic acids and derivatives	Organic sulfuric acids and derivatives	Arylsulfates	Aromatic homomonocyclic compounds	Phenylsulfates	coffee_log	0.321156	1.03155e-26	1.03463e-23
meta_432	L,L-Cyclo(leucylprolyl)	Organic acids and derivatives	Carboxylic acids and derivatives	Amino acids, peptides, and analogues	Aliphatic heteropolycyclic compounds	Alpha amino acids and derivatives	coffee_log	0.319446	1.97052e-26	1.95514e-23
meta_1009	DG(14:1(9Z)/22:2(13Z,16Z)/0:0)	Lipids and lipid-like molecules	Glycerolipids	Diradylglycerols	Aliphatic acyclic compounds	1,2-diacylglycerols	how_often_crisps_savory_crackers	0.318843	2.47356e-26	2.42814e-23
meta_646	Deoxynivalenol	Lipids and lipid-like molecules	Prenol lipids	Sesquiterpenoids	Aliphatic heteropolycyclic compounds	Trichothecenes	alcohol_products_log	0.318462	2.85433e-26	2.77243e-23
meta_468	Ethyl glucuronide	Organic oxygen compounds	Organooxygen compounds	Carbohydrates and carbohydrate conjugates	Aliphatic heteromonocyclic compounds	O-glucuronides	how_often_alcohol	0.318258	3.08252e-26	2.96288e-23
meta_468	Ethyl glucuronide	Organic oxygen compounds	Organooxygen compounds	Carbohydrates and carbohydrate conjugates	Aliphatic heteromonocyclic compounds	O-glucuronides	alcohol.g_log	0.315763	7.83192e-26	7.45034e-23
meta_995	3'-N-Acetyl-4'-O-(9-octadecenoyl)fusarochromanone	Organoheterocyclic compounds	Benzopyrans	1-benzopyrans	Aromatic heteropolycyclic compounds	2,2-dimethyl-1-benzopyrans	how_often_crisps_savory_crackers	0.314069	1.46833e-25	1.38254e-22
meta_625	Luteolin	Phenylpropanoids and polyketides	Flavonoids	Flavones	Aromatic heteropolycyclic compounds	Flavones	how_often_coffee	0.313857	1.58786e-25	1.47998e-22
meta_646	Deoxynivalenol	Lipids and lipid-like molecules	Prenol lipids	Sesquiterpenoids	Aliphatic heteropolycyclic compounds	Trichothecenes	beer	0.313064	2.12752e-25	1.96315e-22
meta_427	Sedoheptulose	Organic oxygen compounds	Organooxygen compounds	Carbohydrates and carbohydrate conjugates	Aliphatic acyclic compounds	Heptoses	coffee_log	0.312064	3.07193e-25	2.80652e-22
meta_468	Ethyl glucuronide	Organic oxygen compounds	Organooxygen compounds	Carbohydrates and carbohydrate conjugates	Aliphatic heteromonocyclic compounds	O-glucuronides	alcohol_products_log	0.309843	6.91458e-25	6.25526e-22
meta_337	Amyl 2-furoate	Organoheterocyclic compounds	Furans	Furoic acid derivatives	Aromatic heteromonocyclic compounds	Furoic acid derivatives	how_often_coffee	0.30825	1.23225e-24	1.10393e-21
meta_331	2(N)-Methyl-norsalsolinol	Organoheterocyclic compounds	Tetrahydroisoquinolines	Not classified	Aromatic heteropolycyclic compounds	Tetrahydroisoquinolines	coffee_log	0.307448	1.64568e-24	1.46013e-21
meta_330	Hippuric acid	Benzenoids	Benzene and substituted derivatives	Benzoic acids and derivatives	Aromatic homomonocyclic compounds	Hippuric acids	coffee_log	0.307083	1.87702e-24	1.64953e-21
meta_152	N-Acetylarylamine	Benzenoids	Benzene and substituted derivatives	Not classified	Aromatic homomonocyclic compounds	Benzene and substituted derivatives	coffee_log	0.306492	2.3215e-24	2.02089e-21
meta_841	Tetrahymanol	Lipids and lipid-like molecules	Prenol lipids	Triterpenoids	Aliphatic homopolycyclic compounds	Triterpenoids	how_often_crisps_savory_crackers	0.304985	3.98118e-24	3.43326e-21
meta_154	Phenylacetic acid	Benzenoids	Benzene and substituted derivatives	Not classified	Aromatic homomonocyclic compounds	Benzene and substituted derivatives	coffee_log	0.304494	4.74332e-24	4.05264e-21
meta_163	Tyrosol	Benzenoids	Phenols	Tyrosols and derivatives	Aromatic homomonocyclic compounds	Tyrosols	how_often_coffee	0.303803	6.06636e-24	5.13548e-21
meta_13	3-Aminopropionaldehyde	Organic oxygen compounds	Organooxygen compounds	Carbonyl compounds	Aliphatic acyclic compounds	Alpha-hydrogen aldehydes	coffee_log	0.302906	8.33696e-24	6.99349e-21
meta_116	2-Hydroxyethanesulfonate	Organic acids and derivatives	Organic sulfonic acids and derivatives	Organosulfonic acids and derivatives	Aliphatic acyclic compounds	Organosulfonic acids	alcohol.g_log	0.302423	9.89124e-24	8.22256e-21
meta_265	Acesulfame	Organic acids and derivatives	Organic sulfuric acids and derivatives	Not classified	Aliphatic heteromonocyclic compounds	Organic sulfuric acids and derivatives	soda_no_sugar	0.302337	1.01965e-23	8.40065e-21
meta_955	TG(8:0/8:0/a-13:0)[rac]	Lipids and lipid-like molecules	Glycerolipids	Triradylcglycerols	Aliphatic acyclic compounds	Triacylglycerols	savoury_snacks_log	0.302164	1.084e-23	8.85178e-21
meta_419	N-Acetyl-L-phenylalanine	Organic acids and derivatives	Carboxylic acids and derivatives	Amino acids, peptides, and analogues	Aromatic homomonocyclic compounds	Phenylalanine and derivatives	coffee_log	0.302091	1.11208e-23	9.00141e-21
meta_994	Glycerol triundecanoate	Lipids and lipid-like molecules	Glycerolipids	Triradylcglycerols	Aliphatic acyclic compounds	Triacylglycerols	savoury_snacks_log	0.302041	1.13218e-23	9.08444e-21
meta_827	Artonol B	Organoheterocyclic compounds	Benzopyrans	1-benzopyrans	Aromatic heteropolycyclic compounds	Pyranoxanthones	coffee_log	0.298203	4.34151e-23	3.45352e-20
meta_601	5-(Hydroxyphenyl)-gamma-valerolactone-O-sulphate	Organic acids and derivatives	Organic sulfuric acids and derivatives	Arylsulfates	Aromatic heteromonocyclic compounds	Phenylsulfates	how_often_coffee	0.296849	6.94287e-23	5.47561e-20
meta_993	Muricatetrocin C	Lipids and lipid-like molecules	Fatty Acyls	Fatty alcohols	Aliphatic heteromonocyclic compounds	Annonaceous acetogenins	savoury_snacks_log	0.296275	8.46568e-23	6.62001e-20
meta_860	Glycinoeclepin A	Lipids and lipid-like molecules	Fatty Acyls	Fatty acids and conjugates	Aliphatic heteropolycyclic compounds	Heterocyclic fatty acids	alcohol.g_log	0.295865	9.7506e-23	7.56073e-20
meta_457	Tyrosol 4-sulfate	Organic acids and derivatives	Organic sulfuric acids and derivatives	Arylsulfates	Aromatic homomonocyclic compounds	Phenylsulfates	how_often_coffee	0.295805	9.95486e-23	7.64556e-20
meta_116	2-Hydroxyethanesulfonate	Organic acids and derivatives	Organic sulfonic acids and derivatives	Organosulfonic acids and derivatives	Aliphatic acyclic compounds	Organosulfonic acids	how_often_alcohol	0.295784	1.00257e-22	7.64556e-20
meta_116	2-Hydroxyethanesulfonate	Organic acids and derivatives	Organic sulfonic acids and derivatives	Organosulfonic acids and derivatives	Aliphatic acyclic compounds	Organosulfonic acids	alcohol_products_log	0.292836	2.75035e-22	2.08021e-19
meta_600	[(7-hydroxy-1-oxo-1H-isochromen-3-yl)methoxy]sulfonic acid	Phenylpropanoids and polyketides	Isocoumarins and derivatives	Not classified	Aromatic heteropolycyclic compounds	Isocoumarins and derivatives	coffee_log	0.292253	3.35253e-22	2.51505e-19
meta_679	(E)-1-O-Cinnamoyl-beta-D-glucose	Phenylpropanoids and polyketides	Cinnamic acids and derivatives	Cinnamic acid esters	Aromatic heteromonocyclic compounds	O-cinnamoyl glycosides	alcohol_products_log	0.291964	3.69875e-22	2.7524e-19
meta_656	D-4'-Phosphopantothenate	Organic acids and derivatives	Carboxylic acids and derivatives	Amino acids, peptides, and analogues	Aliphatic acyclic compounds	Beta amino acids and derivatives	coffee_log	0.291362	4.535e-22	3.3477e-19
meta_479	5-Acetylamino-6-formylamino-3-methyluracil	Organoheterocyclic compounds	Diazines	Pyrimidines and pyrimidine derivatives	Aromatic heteromonocyclic compounds	Hydroxypyrimidines	coffee_log	0.289256	9.21884e-22	6.69723e-19
meta_261	Glycyl-Serine	Organic acids and derivatives	Carboxylic acids and derivatives	Amino acids, peptides, and analogues	Aliphatic acyclic compounds	Dipeptides	coffee_log	0.289238	9.27365e-22	6.69723e-19
meta_981	Squamocin K	Lipids and lipid-like molecules	Fatty Acyls	Fatty alcohols	Aliphatic heteromonocyclic compounds	Annonaceous acetogenins	how_often_crisps_savory_crackers	0.289233	9.29021e-22	6.69723e-19
meta_469	Monoisobutyl phthalic acid	Benzenoids	Benzene and substituted derivatives	Benzoic acids and derivatives	Aromatic homomonocyclic compounds	Benzoic acid esters	coffee_log	0.286657	2.19494e-21	1.57004e-18
meta_358	Pyrocatechol sulfate	Organic acids and derivatives	Organic sulfuric acids and derivatives	Arylsulfates	Aromatic homomonocyclic compounds	Phenylsulfates	coffee_log	0.285389	3.33991e-21	2.37067e-18
meta_126	Pipecolic acid	Organic acids and derivatives	Carboxylic acids and derivatives	Amino acids, peptides, and analogues	Aliphatic heteromonocyclic compounds	Alpha amino acids	fruits_log	0.285343	3.39075e-21	2.38838e-18
meta_698	1,5-Dihydroxy-3-methoxy-2-prenylxanthone	Organoheterocyclic compounds	Benzopyrans	1-benzopyrans	Aromatic heteropolycyclic compounds	2-prenylated xanthones	how_often_coffee	0.284608	4.3206e-21	3.0203e-18
meta_833	Taraxinic acid glucosyl ester	Lipids and lipid-like molecules	Prenol lipids	Terpene lactones	Aliphatic heteropolycyclic compounds	Germacranolides and derivatives	beer	0.282467	8.71562e-21	6.04681e-18
meta_522	2,2,4,4,-Tetramethyl-6-(1-oxopropyl)-1,3,5-cyclohexanetrione	Lipids and lipid-like molecules	Prenol lipids	Monoterpenoids	Aliphatic homomonocyclic compounds	Monocyclic monoterpenoids	beer	0.281365	1.24786e-20	8.59294e-18
meta_1068	PE(18:4(6Z,9Z,12Z,15Z)/P-18:1(11Z))	Lipids and lipid-like molecules	Glycerophospholipids	Glycerophosphoethanolamines	Aliphatic acyclic compounds	Glycerophosphoethanolamines	how_often_fish	0.280203	1.81911e-20	1.24338e-17
meta_67	Pyrocatechol	Benzenoids	Phenols	Benzenediols	Aromatic homomonocyclic compounds	Catechols	coffee_log	0.27799	3.70812e-20	2.5159e-17
meta_793	1,26-Hexacosanediol	Lipids and lipid-like molecules	Fatty Acyls	Fatty alcohols	Aliphatic acyclic compounds	Fatty alcohols	how_often_crisps_savory_crackers	0.277306	4.61549e-20	3.10868e-17
meta_679	(E)-1-O-Cinnamoyl-beta-D-glucose	Phenylpropanoids and polyketides	Cinnamic acids and derivatives	Cinnamic acid esters	Aromatic heteromonocyclic compounds	O-cinnamoyl glycosides	beer	0.276626	5.73435e-20	3.83428e-17
meta_833	Taraxinic acid glucosyl ester	Lipids and lipid-like molecules	Prenol lipids	Terpene lactones	Aliphatic heteropolycyclic compounds	Germacranolides and derivatives	alcohol.g_log	0.276269	6.42488e-20	4.26511e-17
meta_225	Gentisic acid	Benzenoids	Benzene and substituted derivatives	Benzoic acids and derivatives	Aromatic homomonocyclic compounds	Hydroxybenzoic acid derivatives	how_often_muesli	0.276077	6.83016e-20	4.50176e-17
meta_731	Pirenzepine	Organoheterocyclic compounds	Benzodiazepines	1,4-benzodiazepines	Aromatic heteropolycyclic compounds	1,4-benzodiazepines	alcohol_products_log	0.275124	9.24177e-20	6.04805e-17
meta_1009	DG(14:1(9Z)/22:2(13Z,16Z)/0:0)	Lipids and lipid-like molecules	Glycerolipids	Diradylglycerols	Aliphatic acyclic compounds	1,2-diacylglycerols	savoury_snacks_log	0.274984	9.6603e-20	6.27743e-17
meta_440	L-prolyl-L-proline	Organic acids and derivatives	Carboxylic acids and derivatives	Amino acids, peptides, and analogues	Aliphatic heteromonocyclic compounds	Dipeptides	coffee_log	0.273828	1.39138e-19	8.97817e-17
meta_697	13,14-dihydroxy-9-oxo-8,17-dioxatetracyclo[8.7.0.0虏,伔0鹿鹿,鹿伓輍eptadeca-1(10),2(7),3,5,11(16),12,14-heptaen-5-yl acetate	Phenylpropanoids and polyketides	Isoflavonoids	Coumestans	Aromatic heteropolycyclic compounds	Coumestans	how_often_coffee	0.273561	1.51334e-19	9.69735e-17
meta_522	2,2,4,4,-Tetramethyl-6-(1-oxopropyl)-1,3,5-cyclohexanetrione	Lipids and lipid-like molecules	Prenol lipids	Monoterpenoids	Aliphatic homomonocyclic compounds	Monocyclic monoterpenoids	alcohol.g_log	0.273071	1.76523e-19	1.12158e-16
meta_992	Asparagoside B	Lipids and lipid-like molecules	Steroids and steroid derivatives	Steroidal glycosides	Aliphatic heteropolycyclic compounds	Steroidal saponins	savoury_snacks_log	0.273033	1.78636e-19	1.12158e-16
meta_745	Metolazone	Organoheterocyclic compounds	Diazanaphthalenes	Benzodiazines	Aromatic heteropolycyclic compounds	Quinazolines	coffee_log	0.273033	1.78676e-19	1.12158e-16
meta_521	3,4,5-Trimethoxycinnamic acid	Phenylpropanoids and polyketides	Cinnamic acids and derivatives	Hydroxycinnamic acids and derivatives	Aromatic homomonocyclic compounds	Coumaric acids and derivatives	coffee_log	0.272348	2.21473e-19	1.38083e-16
meta_152	N-Acetylarylamine	Benzenoids	Benzene and substituted derivatives	Not classified	Aromatic homomonocyclic compounds	Benzene and substituted derivatives	how_often_coffee	0.271739	2.67889e-19	1.65901e-16
meta_330	Hippuric acid	Benzenoids	Benzene and substituted derivatives	Benzoic acids and derivatives	Aromatic homomonocyclic compounds	Hippuric acids	how_often_coffee	0.271072	3.29818e-19	2.02891e-16
meta_907	18-Hydroxy-16-tritriacontanone	Lipids and lipid-like molecules	Fatty Acyls	Fatty alcohols	Aliphatic acyclic compounds	Long-chain fatty alcohols	savoury_snacks_log	0.271043	3.32795e-19	2.03366e-16
meta_503	N2-Succinyl-L-ornithine	Organic acids and derivatives	Carboxylic acids and derivatives	Amino acids, peptides, and analogues	Aliphatic acyclic compounds	N-acyl-alpha amino acids	coffee_log	0.269967	4.64933e-19	2.82245e-16
meta_147	2,3-Dihydroxyvaleric acid	Lipids and lipid-like molecules	Fatty Acyls	Fatty acids and conjugates	Aliphatic acyclic compounds	Hydroxy fatty acids	how_often_alcohol	0.269663	5.10872e-19	3.08106e-16
meta_655	3-Oxooctadecanoic acid	Lipids and lipid-like molecules	Fatty Acyls	Fatty acids and conjugates	Aliphatic acyclic compounds	Long-chain fatty acids	savoury_snacks_log	0.269035	6.20355e-19	3.71705e-16
meta_907	18-Hydroxy-16-tritriacontanone	Lipids and lipid-like molecules	Fatty Acyls	Fatty alcohols	Aliphatic acyclic compounds	Long-chain fatty alcohols	how_often_crisps_savory_crackers	0.268537	7.23191e-19	4.30527e-16
meta_126	Pipecolic acid	Organic acids and derivatives	Carboxylic acids and derivatives	Amino acids, peptides, and analogues	Aliphatic heteromonocyclic compounds	Alpha amino acids	how_often_fruits	0.268257	7.88406e-19	4.66342e-16
meta_180	6-Methylquinoline	Organoheterocyclic compounds	Quinolines and derivatives	Not classified	Aromatic heteropolycyclic compounds	Quinolines and derivatives	nuts_log	0.268133	8.18962e-19	4.8133e-16
meta_427	Sedoheptulose	Organic oxygen compounds	Organooxygen compounds	Carbohydrates and carbohydrate conjugates	Aliphatic acyclic compounds	Heptoses	how_often_coffee	0.267892	8.82178e-19	5.15203e-16
meta_811	{3-[(E)-2-[3,5-dihydroxy-4-(3-methylbut-2-en-1-yl)phenyl]ethenyl]-2,6-dihydroxyphenyl}oxidanesulfonic acid	Phenylpropanoids and polyketides	Stilbenes	Not classified	Aromatic homomonocyclic compounds	Stilbenes	how_often_coffee	0.267389	1.02935e-18	5.97371e-16
meta_833	Taraxinic acid glucosyl ester	Lipids and lipid-like molecules	Prenol lipids	Terpene lactones	Aliphatic heteropolycyclic compounds	Germacranolides and derivatives	how_often_alcohol	0.26721	1.08747e-18	6.27156e-16
meta_981	Squamocin K	Lipids and lipid-like molecules	Fatty Acyls	Fatty alcohols	Aliphatic heteromonocyclic compounds	Annonaceous acetogenins	savoury_snacks_log	0.266857	1.21137e-18	6.94271e-16
meta_518	Tyrosol 4-sulfate	Organic acids and derivatives	Organic sulfuric acids and derivatives	Arylsulfates	Aromatic homomonocyclic compounds	Phenylsulfates	how_often_coffee	0.265552	1.80406e-18	1.02758e-15
meta_983	TG(8:0/14:0/10:0)	Lipids and lipid-like molecules	Glycerolipids	Triradylcglycerols	Aliphatic acyclic compounds	Triacylglycerols	how_often_crisps_savory_crackers	0.265049	2.10201e-18	1.18994e-15
meta_432	L,L-Cyclo(leucylprolyl)	Organic acids and derivatives	Carboxylic acids and derivatives	Amino acids, peptides, and analogues	Aliphatic heteropolycyclic compounds	Alpha amino acids and derivatives	how_often_coffee	0.265027	2.1159e-18	1.19051e-15
meta_667	Ascorbigen	Organoheterocyclic compounds	Furofurans	Isosorbides	Aromatic heteropolycyclic compounds	Isosorbides	coffee_log	0.26479	2.27358e-18	1.27147e-15
meta_336	Homovanillic acid	Benzenoids	Phenols	Methoxyphenols	Aromatic homomonocyclic compounds	Methoxyphenols	coffee_log	0.264763	2.29251e-18	1.27433e-15
meta_957	6-{[3,7-dihydroxy-2-(1-hydroxy-3-methoxy-4-oxocyclohexyl)-6-methoxy-4-oxo-4H-chromen-5-yl]oxy}-3,4,5-trihydroxyoxane-2-carboxylic acid	Organic oxygen compounds	Organooxygen compounds	Carbohydrates and carbohydrate conjugates	Aromatic heteropolycyclic compounds	Phenolic glycosides	how_often_crisps_savory_crackers	0.264298	2.63936e-18	1.45835e-15
meta_331	2(N)-Methyl-norsalsolinol	Organoheterocyclic compounds	Tetrahydroisoquinolines	Not classified	Aromatic heteropolycyclic compounds	Tetrahydroisoquinolines	how_often_coffee	0.263931	2.9488e-18	1.61963e-15
meta_860	Glycinoeclepin A	Lipids and lipid-like molecules	Fatty Acyls	Fatty acids and conjugates	Aliphatic heteropolycyclic compounds	Heterocyclic fatty acids	how_often_alcohol	0.260651	7.88834e-18	4.30704e-15
meta_249	Tricholomic acid	Organic acids and derivatives	Carboxylic acids and derivatives	Amino acids, peptides, and analogues	Aliphatic heteromonocyclic compounds	Alpha amino acids	coffee_log	0.259499	1.11113e-17	6.03107e-15
meta_823	2-[4-(3-Hydroxypropyl)-2-methoxyphenoxy]-1,3-propanediol 1-glucoside	Organic oxygen compounds	Organooxygen compounds	Carbohydrates and carbohydrate conjugates	Aromatic heteromonocyclic compounds	O-glycosyl compounds	alcohol_products_log	0.258845	1.34813e-17	7.27467e-15
meta_841	Tetrahymanol	Lipids and lipid-like molecules	Prenol lipids	Triterpenoids	Aliphatic homopolycyclic compounds	Triterpenoids	savoury_snacks_log	0.258479	1.50206e-17	8.05818e-15
meta_731	Pirenzepine	Organoheterocyclic compounds	Benzodiazepines	1,4-benzodiazepines	Aromatic heteropolycyclic compounds	1,4-benzodiazepines	beer	0.258224	1.61977e-17	8.63943e-15
meta_885	Lansiol	Lipids and lipid-like molecules	Steroids and steroid derivatives	Ergostane steroids	Aliphatic homopolycyclic compounds	Ergosterols and derivatives	how_often_crisps_savory_crackers	0.257481	2.01538e-17	1.06459e-14
meta_382	Pyrimethanil	Benzenoids	Benzene and substituted derivatives	Aniline and substituted anilines	Aromatic heteromonocyclic compounds	Aniline and substituted anilines	how_often_coffee	0.257475	2.01902e-17	1.06459e-14
meta_478	4-(Dimethylamino)azobenzene	Organoheterocyclic compounds	Azobenzenes	Not classified	Aromatic homomonocyclic compounds	Azobenzenes	alcohol.g_log	0.257372	2.0814e-17	1.09124e-14
meta_453	(5-ethenyl-2-hydroxyphenyl)oxidanesulfonic acid	Organic acids and derivatives	Organic sulfuric acids and derivatives	Arylsulfates	Aromatic homomonocyclic compounds	Phenylsulfates	how_often_coffee	0.257263	2.14872e-17	1.12017e-14
meta_479	5-Acetylamino-6-formylamino-3-methyluracil	Organoheterocyclic compounds	Diazines	Pyrimidines and pyrimidine derivatives	Aromatic heteromonocyclic compounds	Hydroxypyrimidines	how_often_coffee	0.256688	2.54357e-17	1.31857e-14
meta_651	4',5-Dihydroxy-7-methoxy-6-methylflavone	Phenylpropanoids and polyketides	Flavonoids	O-methylated flavonoids	Aromatic heteropolycyclic compounds	7-O-methylated flavonoids	coffee_log	0.256555	2.64476e-17	1.36337e-14
meta_646	Deoxynivalenol	Lipids and lipid-like molecules	Prenol lipids	Sesquiterpenoids	Aliphatic heteropolycyclic compounds	Trichothecenes	alcohol.g_log	0.256407	2.76168e-17	1.41573e-14
meta_332	4-Hydroxyphenylpyruvic acid	Benzenoids	Benzene and substituted derivatives	Phenylpyruvic acid derivatives	Aromatic homomonocyclic compounds	Phenylpyruvic acid derivatives	coffee_log	0.255418	3.68579e-17	1.87902e-14
meta_656	D-4'-Phosphopantothenate	Organic acids and derivatives	Carboxylic acids and derivatives	Amino acids, peptides, and analogues	Aliphatic acyclic compounds	Beta amino acids and derivatives	how_often_coffee	0.255103	4.03962e-17	2.04809e-14
meta_227	1-(2-Thienyl)-1-butanone	Organic oxygen compounds	Organooxygen compounds	Carbonyl compounds	Aromatic heteromonocyclic compounds	Aryl alkyl ketones	how_often_muesli	0.254398	4.95702e-17	2.49947e-14
meta_440	L-prolyl-L-proline	Organic acids and derivatives	Carboxylic acids and derivatives	Amino acids, peptides, and analogues	Aliphatic heteromonocyclic compounds	Dipeptides	how_often_coffee	0.253715	6.04106e-17	3.02952e-14
meta_379	(Z)-4-Dodecenal	Lipids and lipid-like molecules	Fatty Acyls	Fatty aldehydes	Aliphatic acyclic compounds	Fatty aldehydes	how_often_fish	0.25311	7.19494e-17	3.58868e-14
meta_1068	PE(18:4(6Z,9Z,12Z,15Z)/P-18:1(11Z))	Lipids and lipid-like molecules	Glycerophospholipids	Glycerophosphoethanolamines	Aliphatic acyclic compounds	Glycerophosphoethanolamines	fish_log	0.252839	7.77855e-17	3.85891e-14
meta_522	2,2,4,4,-Tetramethyl-6-(1-oxopropyl)-1,3,5-cyclohexanetrione	Lipids and lipid-like molecules	Prenol lipids	Monoterpenoids	Aliphatic homomonocyclic compounds	Monocyclic monoterpenoids	how_often_alcohol	0.252772	7.93038e-17	3.9132e-14
meta_667	Ascorbigen	Organoheterocyclic compounds	Furofurans	Isosorbides	Aromatic heteropolycyclic compounds	Isosorbides	how_often_coffee	0.251702	1.07847e-16	5.29334e-14
meta_885	Lansiol	Lipids and lipid-like molecules	Steroids and steroid derivatives	Ergostane steroids	Aliphatic homopolycyclic compounds	Ergosterols and derivatives	savoury_snacks_log	0.251113	1.27644e-16	6.23185e-14
meta_225	Gentisic acid	Benzenoids	Benzene and substituted derivatives	Benzoic acids and derivatives	Aromatic homomonocyclic compounds	Hydroxybenzoic acid derivatives	cereals_log	0.250314	1.60299e-16	7.78496e-14
meta_473	N-Acetyl-L-tyrosine	Organic acids and derivatives	Carboxylic acids and derivatives	Amino acids, peptides, and analogues	Aromatic homomonocyclic compounds	Tyrosine and derivatives	coffee_log	0.249963	1.77155e-16	8.55852e-14
meta_750	Cefaclor	Organic acids and derivatives	Carboxylic acids and derivatives	Amino acids, peptides, and analogues	Aromatic heteropolycyclic compounds	N-acyl-alpha amino acids and derivatives	coffee_log	0.249936	1.78545e-16	8.58076e-14
meta_646	Deoxynivalenol	Lipids and lipid-like molecules	Prenol lipids	Sesquiterpenoids	Aliphatic heteropolycyclic compounds	Trichothecenes	how_often_alcohol	0.249195	2.20329e-16	1.0534e-13
meta_147	2,3-Dihydroxyvaleric acid	Lipids and lipid-like molecules	Fatty Acyls	Fatty acids and conjugates	Aliphatic acyclic compounds	Hydroxy fatty acids	alcohol_products_log	0.247228	3.83797e-16	1.82153e-13
meta_678	De-O-methylsterigmatocystin	Phenylpropanoids and polyketides	Sterigmatocystins	Not classified	Aromatic heteropolycyclic compounds	Sterigmatocystins	coffee_log	0.247218	3.84939e-16	1.82153e-13
meta_983	TG(8:0/14:0/10:0)	Lipids and lipid-like molecules	Glycerolipids	Triradylcglycerols	Aliphatic acyclic compounds	Triacylglycerols	savoury_snacks_log	0.246795	4.33444e-16	2.04059e-13
meta_358	Pyrocatechol sulfate	Organic acids and derivatives	Organic sulfuric acids and derivatives	Arylsulfates	Aromatic homomonocyclic compounds	Phenylsulfates	how_often_coffee	0.246037	5.3589e-16	2.51009e-13
meta_329	1-(Isothiocyanatomethyl)-4-methoxybenzene	Benzenoids	Benzene and substituted derivatives	Phenylmethylamines	Aromatic homomonocyclic compounds	Phenylmethylamines	coffee_log	0.245767	5.77783e-16	2.69006e-13
meta_257	Tryptophanol	Organoheterocyclic compounds	Indoles and derivatives	Indoles	Aromatic heteropolycyclic compounds	3-alkylindoles	coffee_log	0.245752	5.80289e-16	2.69006e-13
meta_977	(3R,3'R,6'R,9-cis)-beta,epsilon-Carotene-3,3'-diol	Lipids and lipid-like molecules	Prenol lipids	Tetraterpenoids	Aliphatic homomonocyclic compounds	Xanthophylls	how_often_crisps_savory_crackers	0.245735	5.8306e-16	2.69006e-13
meta_886	erythro-8,10-Hentriacontanediol	Lipids and lipid-like molecules	Fatty Acyls	Fatty alcohols	Aliphatic acyclic compounds	Fatty alcohols	savoury_snacks_log	0.24567	5.93656e-16	2.72532e-13
meta_367	Tocainide	Benzenoids	Benzene and substituted derivatives	Xylenes	Aromatic homomonocyclic compounds	m-Xylenes	how_often_coffee	0.245204	6.76055e-16	3.08823e-13
meta_147	2,3-Dihydroxyvaleric acid	Lipids and lipid-like molecules	Fatty Acyls	Fatty acids and conjugates	Aliphatic acyclic compounds	Hydroxy fatty acids	alcohol.g_log	0.245056	7.04437e-16	3.20203e-13
meta_226	5-(2-carboxylatoethyl)-4-oxo-4,5-dihydro-1H-imidazol-5-ide	Organoheterocyclic compounds	Azoles	Imidazoles	Aromatic heteromonocyclic compounds	Imidazolyl carboxylic acids and derivatives	how_often_muesli	0.245038	7.07932e-16	3.20214e-13
meta_651	4',5-Dihydroxy-7-methoxy-6-methylflavone	Phenylpropanoids and polyketides	Flavonoids	O-methylated flavonoids	Aromatic heteropolycyclic compounds	7-O-methylated flavonoids	how_often_coffee	0.244738	7.69471e-16	3.46352e-13
meta_349	Pseudoecgonine	Alkaloids and derivatives	Tropane alkaloids	Not classified	Aliphatic heteropolycyclic compounds	Tropane alkaloids	dairy_log	0.244216	8.89406e-16	3.98394e-13
meta_688	Isopulegone caffeate	Phenylpropanoids and polyketides	Cinnamic acids and derivatives	Hydroxycinnamic acids and derivatives	Aromatic homomonocyclic compounds	Coumaric acids and derivatives	alcohol_products_log	0.243868	9.79418e-16	4.36593e-13
meta_812	3-(4-Hydroxybenzoyl)epicatechin	Phenylpropanoids and polyketides	Flavonoids	Flavans	Aromatic heteropolycyclic compounds	Catechins	coffee_log	0.243363	1.12617e-15	4.99599e-13
meta_469	Monoisobutyl phthalic acid	Benzenoids	Benzene and substituted derivatives	Benzoic acids and derivatives	Aromatic homomonocyclic compounds	Benzoic acid esters	how_often_coffee	0.243074	1.2197e-15	5.385e-13
meta_478	4-(Dimethylamino)azobenzene	Organoheterocyclic compounds	Azobenzenes	Not classified	Aromatic homomonocyclic compounds	Azobenzenes	how_often_alcohol	0.24234	1.49301e-15	6.5603e-13
meta_596	3-Oxohexadecanoic acid	Lipids and lipid-like molecules	Fatty Acyls	Fatty acids and conjugates	Aliphatic acyclic compounds	Long-chain fatty acids	savoury_snacks_log	0.24224	1.53432e-15	6.70986e-13
meta_1137	PC(DiMe(11,3)/MonoMe(11,3))	Lipids and lipid-like molecules	Glycerophospholipids	Glycerophosphocholines	Aromatic heteromonocyclic compounds	Phosphatidylcholines	how_often_fish	0.241099	2.09767e-15	9.13019e-13
meta_990	Hericenone E	Lipids and lipid-like molecules	Fatty Acyls	Lineolic acids and derivatives	Aromatic homomonocyclic compounds	Lineolic acids and derivatives	how_often_crisps_savory_crackers	0.240509	2.46426e-15	1.06754e-12
meta_995	3'-N-Acetyl-4'-O-(9-octadecenoyl)fusarochromanone	Organoheterocyclic compounds	Benzopyrans	1-benzopyrans	Aromatic heteropolycyclic compounds	2,2-dimethyl-1-benzopyrans	savoury_snacks_log	0.240052	2.79074e-15	1.20333e-12
meta_478	4-(Dimethylamino)azobenzene	Organoheterocyclic compounds	Azobenzenes	Not classified	Aromatic homomonocyclic compounds	Azobenzenes	alcohol_products_log	0.239484	3.25643e-15	1.3976e-12
meta_227	1-(2-Thienyl)-1-butanone	Organic oxygen compounds	Organooxygen compounds	Carbonyl compounds	Aromatic heteromonocyclic compounds	Aryl alkyl ketones	cereals_log	0.239309	3.41436e-15	1.4586e-12
meta_342	Epinephrine	Benzenoids	Phenols	Benzenediols	Aromatic homomonocyclic compounds	Catechols	coffee_log	0.238524	4.22335e-15	1.79588e-12
meta_679	(E)-1-O-Cinnamoyl-beta-D-glucose	Phenylpropanoids and polyketides	Cinnamic acids and derivatives	Cinnamic acid esters	Aromatic heteromonocyclic compounds	O-cinnamoyl glycosides	alcohol.g_log	0.238505	4.24429e-15	1.7965e-12
meta_477	Nnal-N-oxide	Organoheterocyclic compounds	Pyridines and derivatives	Pyridinium derivatives	Aromatic heteromonocyclic compounds	Pyridinium derivatives	alcohol.g_log	0.237881	5.02273e-15	2.11629e-12
meta_67	Pyrocatechol	Benzenoids	Phenols	Benzenediols	Aromatic homomonocyclic compounds	Catechols	how_often_coffee	0.237234	5.978e-15	2.50734e-12
meta_990	Hericenone E	Lipids and lipid-like molecules	Fatty Acyls	Lineolic acids and derivatives	Aromatic homomonocyclic compounds	Lineolic acids and derivatives	savoury_snacks_log	0.236954	6.44362e-15	2.6904e-12
meta_614	Artabsinolide A	Organoheterocyclic compounds	Lactones	Gamma butyrolactones	Aliphatic heteropolycyclic compounds	Gamma butyrolactones	beer	0.236815	6.68865e-15	2.78013e-12
meta_956	LysoPC(20:5(5Z,8Z,11Z,14Z,17Z))	Lipids and lipid-like molecules	Glycerophospholipids	Glycerophosphocholines	Aliphatic acyclic compounds	1-acyl-sn-glycero-3-phosphocholines	how_often_crisps_savory_crackers	0.236575	7.13183e-15	2.95104e-12
meta_226	5-(2-carboxylatoethyl)-4-oxo-4,5-dihydro-1H-imidazol-5-ide	Organoheterocyclic compounds	Azoles	Imidazoles	Aromatic heteromonocyclic compounds	Imidazolyl carboxylic acids and derivatives	cereals_log	0.235385	9.80141e-15	4.03757e-12
meta_600	[(7-hydroxy-1-oxo-1H-isochromen-3-yl)methoxy]sulfonic acid	Phenylpropanoids and polyketides	Isocoumarins and derivatives	Not classified	Aromatic heteropolycyclic compounds	Isocoumarins and derivatives	how_often_coffee	0.235294	1.00415e-14	4.1181e-12
meta_419	N-Acetyl-L-phenylalanine	Organic acids and derivatives	Carboxylic acids and derivatives	Amino acids, peptides, and analogues	Aromatic homomonocyclic compounds	Phenylalanine and derivatives	how_often_coffee	0.233403	1.65701e-14	6.76545e-12
meta_261	Glycyl-Serine	Organic acids and derivatives	Carboxylic acids and derivatives	Amino acids, peptides, and analogues	Aliphatic acyclic compounds	Dipeptides	how_often_coffee	0.233283	1.7104e-14	6.95265e-12
meta_636	[6]-Dehydrogingerdione	Phenylpropanoids and polyketides	Cinnamic acids and derivatives	Hydroxycinnamic acids and derivatives	Aromatic homomonocyclic compounds	Hydroxycinnamic acids and derivatives	alcohol_products_log	0.232657	2.01723e-14	8.16394e-12
meta_442	2,6-Diisopropylnaphthalene	Benzenoids	Naphthalenes	Not classified	Aromatic homopolycyclic compounds	Naphthalenes	coffee_log	0.231897	2.46255e-14	9.92266e-12
meta_154	Phenylacetic acid	Benzenoids	Benzene and substituted derivatives	Not classified	Aromatic homomonocyclic compounds	Benzene and substituted derivatives	how_often_coffee	0.231025	3.0931e-14	1.24093e-11
meta_665	Cardanolmonoene	Benzenoids	Phenols	1-hydroxy-4-unsubstituted benzenoids	Aromatic homomonocyclic compounds	1-hydroxy-4-unsubstituted benzenoids	how_often_fish	0.230334	3.70263e-14	1.47903e-11
meta_548	5,6-Dihydrouridine	Organic oxygen compounds	Organooxygen compounds	Carbohydrates and carbohydrate conjugates	Aliphatic heteromonocyclic compounds	Glycosylamines	coffee_log	0.2301	3.93527e-14	1.56519e-11
meta_886	erythro-8,10-Hentriacontanediol	Lipids and lipid-like molecules	Fatty Acyls	Fatty alcohols	Aliphatic acyclic compounds	Fatty alcohols	how_often_crisps_savory_crackers	0.229415	4.69954e-14	1.86114e-11
meta_477	Nnal-N-oxide	Organoheterocyclic compounds	Pyridines and derivatives	Pyridinium derivatives	Aromatic heteromonocyclic compounds	Pyridinium derivatives	how_often_alcohol	0.229272	4.87697e-14	1.92315e-11
meta_95	3-Hydroxy-2-methyl-[R-(R,S)]-butanoic acid	Lipids and lipid-like molecules	Fatty Acyls	Fatty acids and conjugates	Aliphatic acyclic compounds	Hydroxy fatty acids	alcohol.g_log	0.227786	7.15449e-14	2.80925e-11
meta_827	Artonol B	Organoheterocyclic compounds	Benzopyrans	1-benzopyrans	Aromatic heteropolycyclic compounds	Pyranoxanthones	how_often_coffee	0.22682	9.16555e-14	3.58365e-11
meta_678	De-O-methylsterigmatocystin	Phenylpropanoids and polyketides	Sterigmatocystins	Not classified	Aromatic heteropolycyclic compounds	Sterigmatocystins	how_often_coffee	0.225872	1.16752e-13	4.54565e-11
meta_1073	PC(14:0/18:2(9Z,12Z))	Lipids and lipid-like molecules	Glycerophospholipids	Glycerophosphocholines	Aliphatic acyclic compounds	Phosphatidylcholines	cheese_log	0.225688	1.2235e-13	4.7436e-11
meta_521	3,4,5-Trimethoxycinnamic acid	Phenylpropanoids and polyketides	Cinnamic acids and derivatives	Hydroxycinnamic acids and derivatives	Aromatic homomonocyclic compounds	Coumaric acids and derivatives	how_often_coffee	0.225573	1.25971e-13	4.86354e-11
meta_379	(Z)-4-Dodecenal	Lipids and lipid-like molecules	Fatty Acyls	Fatty aldehydes	Aliphatic acyclic compounds	Fatty aldehydes	fish_log	0.223365	2.20222e-13	8.46697e-11
meta_13	3-Aminopropionaldehyde	Organic oxygen compounds	Organooxygen compounds	Carbonyl compounds	Aliphatic acyclic compounds	Alpha-hydrogen aldehydes	how_often_coffee	0.223188	2.30293e-13	8.81746e-11
meta_257	Tryptophanol	Organoheterocyclic compounds	Indoles and derivatives	Indoles	Aromatic heteropolycyclic compounds	3-alkylindoles	how_often_coffee	0.223124	2.34025e-13	8.9233e-11
meta_565	Tetradecanedioic acid	Lipids and lipid-like molecules	Fatty Acyls	Fatty acids and conjugates	Aliphatic acyclic compounds	Long-chain fatty acids	how_often_fruits	0.223001	2.41326e-13	9.16382e-11
meta_823	2-[4-(3-Hydroxypropyl)-2-methoxyphenoxy]-1,3-propanediol 1-glucoside	Organic oxygen compounds	Organooxygen compounds	Carbohydrates and carbohydrate conjugates	Aromatic heteromonocyclic compounds	O-glycosyl compounds	alcohol.g_log	0.222743	2.57465e-13	9.7366e-11
meta_477	Nnal-N-oxide	Organoheterocyclic compounds	Pyridines and derivatives	Pyridinium derivatives	Aromatic heteromonocyclic compounds	Pyridinium derivatives	alcohol_products_log	0.222154	2.98464e-13	1.1241e-10
meta_473	N-Acetyl-L-tyrosine	Organic acids and derivatives	Carboxylic acids and derivatives	Amino acids, peptides, and analogues	Aromatic homomonocyclic compounds	Tyrosine and derivatives	how_often_coffee	0.221603	3.4252e-13	1.28479e-10
meta_716	15-Acetyl-4-deoxynivalenol	Lipids and lipid-like molecules	Prenol lipids	Sesquiterpenoids	Aliphatic heteropolycyclic compounds	Trichothecenes	alcohol_products_log	0.221386	3.61531e-13	1.3506e-10
meta_415	Ethyl trans-p-methoxycinnamate	Phenylpropanoids and polyketides	Cinnamic acids and derivatives	Cinnamic acid esters	Aromatic homomonocyclic compounds	Cinnamic acid esters	coffee_log	0.220681	4.30854e-13	1.60309e-10
meta_614	Artabsinolide A	Organoheterocyclic compounds	Lactones	Gamma butyrolactones	Aliphatic heteropolycyclic compounds	Gamma butyrolactones	alcohol_products_log	0.220156	4.90845e-13	1.81897e-10
meta_571	Homovanillic acid sulfate	Organic acids and derivatives	Organic sulfuric acids and derivatives	Arylsulfates	Aromatic homomonocyclic compounds	Phenylsulfates	coffee_log	0.21933	6.02013e-13	2.22201e-10
meta_383	4-Vinylphenol sulfate	Organic acids and derivatives	Organic sulfuric acids and derivatives	Arylsulfates	Aromatic homomonocyclic compounds	Phenylsulfates	nuts_log	0.219074	6.41288e-13	2.35754e-10
meta_423	Pilocarpine	Alkaloids and derivatives	Not classified	Not classified	Aromatic heteromonocyclic compounds	Alkaloids and derivatives	coffee_log	0.218475	7.43204e-13	2.72136e-10
meta_731	Pirenzepine	Organoheterocyclic compounds	Benzodiazepines	1,4-benzodiazepines	Aromatic heteropolycyclic compounds	1,4-benzodiazepines	alcohol.g_log	0.217955	8.44254e-13	3.07916e-10
meta_326	2-O-Methyl-L-fucose	Organic oxygen compounds	Organooxygen compounds	Carbohydrates and carbohydrate conjugates	Aliphatic heteromonocyclic compounds	Hexoses	coffee_log	0.217868	8.62423e-13	3.13304e-10
meta_823	2-[4-(3-Hydroxypropyl)-2-methoxyphenoxy]-1,3-propanediol 1-glucoside	Organic oxygen compounds	Organooxygen compounds	Carbohydrates and carbohydrate conjugates	Aromatic heteromonocyclic compounds	O-glycosyl compounds	how_often_alcohol	0.217253	1.00254e-12	3.62778e-10
meta_954	Ciclesonide	Lipids and lipid-like molecules	Steroids and steroid derivatives	Pregnane steroids	Aliphatic heteropolycyclic compounds	Gluco/mineralocorticoids, progestogins and derivatives	how_often_crisps_savory_crackers	0.217035	1.05732e-12	3.81108e-10
meta_95	3-Hydroxy-2-methyl-[R-(R,S)]-butanoic acid	Lipids and lipid-like molecules	Fatty Acyls	Fatty acids and conjugates	Aliphatic acyclic compounds	Hydroxy fatty acids	alcohol_products_log	0.216824	1.11307e-12	3.99641e-10
meta_332	4-Hydroxyphenylpyruvic acid	Benzenoids	Benzene and substituted derivatives	Phenylpyruvic acid derivatives	Aromatic homomonocyclic compounds	Phenylpyruvic acid derivatives	how_often_coffee	0.215639	1.48477e-12	5.31031e-10
meta_126	Pipecolic acid	Organic acids and derivatives	Carboxylic acids and derivatives	Amino acids, peptides, and analogues	Aliphatic heteromonocyclic compounds	Alpha amino acids	meat_log	-0.215429	1.56248e-12	5.56666e-10
meta_793	1,26-Hexacosanediol	Lipids and lipid-like molecules	Fatty Acyls	Fatty alcohols	Aliphatic acyclic compounds	Fatty alcohols	savoury_snacks_log	0.215123	1.68228e-12	5.97042e-10
meta_503	N2-Succinyl-L-ornithine	Organic acids and derivatives	Carboxylic acids and derivatives	Amino acids, peptides, and analogues	Aliphatic acyclic compounds	N-acyl-alpha amino acids	how_often_coffee	0.214964	1.74844e-12	6.18144e-10
meta_543	Valyl-Glutamate	Organic acids and derivatives	Carboxylic acids and derivatives	Amino acids, peptides, and analogues	Aliphatic acyclic compounds	Dipeptides	coffee_log	0.214885	1.78209e-12	6.27638e-10
meta_429	Aprobarbital	Organoheterocyclic compounds	Diazines	Pyrimidines and pyrimidine derivatives	Aliphatic heteromonocyclic compounds	Barbituric acid derivatives	coffee_log	0.214803	1.81759e-12	6.37704e-10
meta_377	2,6-Dimethoxy-4-propylphenol	Benzenoids	Phenols	Methoxyphenols	Aromatic homomonocyclic compounds	Methoxyphenols	red_wine	0.21379	2.31983e-12	8.10834e-10
meta_826	Bismurrayaquinone A	Organoheterocyclic compounds	Indoles and derivatives	Carbazoles	Aromatic heteropolycyclic compounds	Carbazoles	coffee_log	0.21355	2.45704e-12	8.55551e-10
meta_688	Isopulegone caffeate	Phenylpropanoids and polyketides	Cinnamic acids and derivatives	Hydroxycinnamic acids and derivatives	Aromatic homomonocyclic compounds	Coumaric acids and derivatives	beer	0.213071	2.75582e-12	9.5598e-10
[truncated: 2,588 more rows]

## Sheet: S6_GWAS_metaQTLs
meta_abbreviation	HMDB_id	name	metabolite clinical relevance	super_class	class	sub_class	molecular_framework	direct_parent	SNP	SNP clinical relevance	within_genes	representative_genes	chromosome	position	SNP_type	allele_assessed	Pval_LLD_base_discovery	r_LLD_base_discovery	Pval_LLD_fup_replication	r_LLD_fup_replication	Pval_LLD_subset_replication	r_LLD_subset_replication	Pval_GoNL_replication	r_GoNL_replication	extra_metaQTL_adj_diet_microbiome	novel_mQTL	cs_description	description
[truncated: 73 more rows]

[truncated: 12 more sheets: S7_MWAS_species, S8_MWAS_pathway, S9_variance_single_meta, S10_stability_asso, S11_MR_microbioe_to_meta, S12_MR_exp_microbioe_out_meta, S13_MR_exp_meta_out_microbioe, S14_MWAS_gutSMASH_pathway, S15_MWAS_vSV, S16_MWAS_dSV, S17_media_diet_microbe_meta, S18_100PCs_phenotype_asso]
